# Supplementary material for: An experimental, computational, and uncertainty analysis study of the rates of iodoalkane trapping by DABCO in solution phase organic media
Source: Royal Society of Chemistry journal article supplement (doi:10.1039/d2cp05286e), 2023-01-01
Supplement: d2cp05286e2.xlsx [file d2cp05286e2.xlsx]

## Sheet: DABCO+MeI METHANOL
Eyring plot and error propagation for the activation parameters for the DABCO + CH3I in CD3OD reaction at three temperatures.
The uncertainties in the plot are from the linear least squares fit of the data. The error propagation is from the equation given in Morse, Spencer, Wilson and Girolami, Organometallics, 13, 1646-1655 (1994). See the equations below.
Gas Constant	0.00831446	kJ/(K mol)
Planck's Constant	6.6207e-34	J sec
Boltzmann's Constant	1.38065e-23	J/K
Temperature (°C)	Temperature (K)	Rate (M-1s-1)
30	303.15	0.00933
45	318.15	0.02081
55	328.15	0.03309
sT (K)	1	Estimate of temperature uncertainty.
sk (M-1s-1)	0.00118	Average of the three k MCMC uncertainties.
Tmax (K)	328.15
Tmin (K)	303.15
kmax (M-1s-1)	0.03309
kmin (M-1s-1)	0.00933
DT (K)	25
DL	1.18675
DH‡ (kJ/mol)	39.4
(sDH‡)2 (kJ/mol)2	12.572
sDH‡ (kJ/mol)	3.54571
DS‡ (kJ/mol K)	-0.154
(sDS‡)2 (kJ/mol K)	0.000126449
sDS‡ (kJ/mol K)	0.011245
Using the error propagation formulas at right from the Girolami paper,
we get DH‡ = 39(4) kJ/mol and DS‡ = -0.154(11) kJ/(mol K).
We used sT = 1.0 K and sk = 0.00118 M-1s-1 and calculate the
uncertainties for the T = 318.15 K datum.
Arrhenius plot and error propagation for the activation energy for the DABCO + CH3I in CD3OD reaction at three temperatures.
The uncertainties in the plot are from the linear least squares fit of the data. The error propagation is from the equation given in Steigel, Sauer, Kleier and Binsch, JACS, 94, 2770-2779 (1972). See the equation below.
DT (K)	25
D (lnk)	1.266
sT (K)	1
sk	0.00118
T (K)	318.15
k (M-1s-1)	0.02081
DE‡ (kJ/mol)	41.981
(sE‡/DE‡)2	0.00721222
sE‡/DE‡	0.0849248
DE‡ (kJ/mol) * sE‡/DE‡	3.56523
DE‡ = 42(4) kJ/mol. The uncertainty is calculated for the T = 318.15 K datum.

## Sheet: DABCO + BuI AcN
Eyring plot and error propagation for the activation parameters for the DABCO + BuI in CD3CN reaction at three temperatures.
The uncertainties in the plot are from the linear least squares fit of the data. The error propagation is from the equation given in Morse, Spencer, Wilson and Girolami, Organometallics, 13, 1646-1655 (1994). See the equations below.
Gas Constant	0.00831446	kJ/(K mol)
Planck's Constant	6.6207e-34	J sec
Boltzmann's Constant	1.38065e-23	J/K
Temperature (°C)	Temperature (K)	Rate (M-1s-1)
29.6	302.75	0.01468
50.9	324.05	0.03073
77.7	350.85	0.07181
sT (K)	1	Estimate of temperature uncertainty.
sk (M-1s-1)	0.00204	Average of the three k MCMC uncertainties.
Tmax (K)	350.85
Tmin (K)	302.75
kmax (M-1s-1)	0.07181
kmin (M-1s-1)	0.01468
DT (K)	48.1
DL	1.44009
DH‡ (kJ/mol)	26.45
(sDH‡)2 (kJ/mol)2	3.72143
sDH‡ (kJ/mol)	1.9291
DS‡ (kJ/mol K)	-0.1928
(sDS‡)2 (kJ/mol K)	3.52778e-05
sDS‡ (kJ/mol K)	0.00593951
Using the error propagation formulas at right from the Girolami paper,
we get DH‡ = 26(4) kJ/mol and DS‡ = -0.193(6) kJ/(mol K).
We used sT = 1.0 K and sk = 0.00204 M-1s-1, which is the average of of the MCMC reaction
rate uncertaties, and calculate the uncertainties for the T = 324.05 K datum.
Arrhenius plot and error propagation for the activation energy for the DABCO + BuI in CD3CN reaction at three temperatures.
The uncertainties in the plot are from the linear least squares fit of the data. The error propagation is from the equation given in Steigel, Sauer, Kleier and Binsch, JACS, 94, 2770-2779 (1972). See the equation below.
DT (K)	48.1
D (lnk)	1.58754
sT (K)	1	Estimate of temperature uncertainty.
sk	0.00204	Average of the three k MCMC uncertainties.
T (K)	324.05
k (M-1s-1)	0.03073
DE‡ (kJ/mol)	29.16
(sE‡/DE‡)2	0.00436162
sE‡/DE‡	0.0660426
DE‡ (kJ/mol) * sE‡/DE‡	1.9258
DE‡ = 29(2) kJ/mol. The uncertainty is calculated for the T = 324.05 K datum.

## Sheet: MeDABCOI + MeI DMSO
Eyring plot and error propagation for the activation parameters for the MeDABCOI + CH3I in DMSO-d6 reaction at three temperatures.
The uncertainties in the plot are from the linear least squares fit of the data. The error propagation is from the equation given in Morse, Spencer, Wilson and Girolami, Organometallics, 13, 1646-1655 (1994). See the equations below.
Gas Constant	0.00831446	kJ/(K mol)
Planck's Constant	6.6207e-34	J sec
Boltzmann's Constant	1.38065e-23	J/K
Temperature (°C)	Temperature (K)	Rate (M-1s-1)
30	303.15	0.05098
50	323.15	0.1094
70	343.15	0.1996
sT (K)	1	Estimate of temperature uncertainty.
sk (M-1s-1)	0.00629	Average of the three k MCMC uncertainties.
Tmax (K)	343.15
Tmin (K)	303.15
kmax (M-1s-1)	0.1996
kmin (M-1s-1)	0.05098
DT (K)	40
DL	1.24094
DH‡ (kJ/mol)	26.87
(sDH‡)2 (kJ/mol)2	4.18316
sDH‡ (kJ/mol)	2.04528
DS‡ (kJ/mol K)	-0.1811
(sDS‡)2 (kJ/mol K)	4.03756e-05
sDS‡ (kJ/mol K)	0.00635418
Using the error propagation formulas at right from the Girolami paper,
we get DH‡ = 27(2) kJ/mol and DS‡ = -0.1811(64) kJ/(mol K).
We used sT = 1.0 K and sk = 0.00629 M-1s-1 and calculate the
uncertainties for the T = 323.15 K datum.
Arrhenius plot and error propagation for the activation energy for the MeDABCOI + CH3I in DMSO-d6 reaction at three temperatures.
The uncertainties in the plot are from the linear least squares fit of the data. The error propagation is from the equation given in Steigel, Sauer, Kleier and Binsch, JACS, 94, 2770-2779 (1972). See the equation below.
DT (K)	40
D (lnk)	1.36488
sT (K)	1	Estimate of temperature uncertainty.
sk (M-1s-1)	0.00629	Average of the three k MCMC uncertainties.
T (K)	323.15
k (M-1s-1)	0.1094
DE‡ (kJ/mol)	29.55
(sE‡/DE‡)2	0.004799
sE‡/DE‡	0.0692748
DE‡ (kJ/mol) * sE‡/DE‡	2.04707
DE‡ =30(2) kJ/mol. The uncertainty is calculated for the T = 323.15 K datum.

## Sheet: MeDABCOI + MeI AcN
Eyring plot and error propagation for the activation parameters for the MeDABCOI + CH3I in AcN-d3 reaction at three temperatures.
The uncertainties in the plot are from the linear least squares fit of the data. The error propagation is from the equation given in Morse, Spencer, Wilson and Girolami, Organometallics, 13, 1646-1655 (1994). See the equations below.
Gas Constant	0.00831446	kJ/(K mol)
Planck's Constant	6.6207e-34	J sec
Boltzmann's Constant	1.38065e-23	J/K
Temperature (°C)	Temperature (K)	Rate (M-1s-1)
29.6	302.75	0.00102
50.9	324.05	0.00193
77.7	350.85	0.00428
sT (K)	1	Estimate of temperature uncertainty.
sk (M-1s-1)	0.000153	Average of the three k MCMC uncertainties.
Tmax (K)	350.85
Tmin (K)	302.75
kmax (M-1s-1)	0.00428
kmin (M-1s-1)	0.00102
DT (K)	48.1
DL	1.2867
DH‡ (kJ/mol)	23.65
(sDH‡)2 (kJ/mol)2	4.84934
sDH‡ (kJ/mol)	2.20212
DS‡ (kJ/mol K)	-0.22435
(sDS‡)2 (kJ/mol K)	4.60388e-05
sDS‡ (kJ/mol K)	0.00678519
Using the error propagation formulas at right from the Girolami paper,
we get DH‡ = 24(2) kJ/mol and DS‡ = -0.224(7) kJ/(mol K).
We used sT = 1.0 K and sk = 0.000153 M-1s-1 and calculate the
uncertainties for the T = 324.05 K datum.
Arrhenius plot and error propagation for the activation energy for the MeDABCOI + CH3I in AcN-d3 reaction at three temperatures.
The uncertainties in the plot are from the linear least squares fit of the data. The error propagation is from the equation given in Steigel, Sauer, Kleier and Binsch, JACS, 94, 2770-2779 (1972). See the equation below.
DT (K)	48.1
D (lnk)	1.43415
sT (K)	1	Estimate of temperature uncertainty.
sk (M-1s-1)	0.000153	Average of the three k MCMC uncertainties.
T (K)	324.05
k (M-1s-1)	0.00193
DE‡ (kJ/mol)	26.36
(sE‡/DE‡)2	0.0069754
sE‡/DE‡	0.0835189
DE‡ (kJ/mol) * sE‡/DE‡	2.20156
DE‡ =26(2) kJ/mol. The uncertainty is calculated for the T = 324.05 K datum.

## Sheet: MeDABCOI + MeI METHANOL
Eyring plot and error propagation for the activation parameters for the MeDABCOI + CH3I in methanol-d4 reaction at three temperatures.
The uncertainties in the plot are from the linear least squares fit of the data. The error propagation is from the equation given in Morse, Spencer, Wilson and Girolami, Organometallics, 13, 1646-1655 (1994). See the equations below.
Gas Constant	0.00831446	kJ/(K mol)
Planck's Constant	6.6207e-34	J sec
Boltzmann's Constant	1.38065e-23	J/K
Temperature (°C)	Temperature (K)	Rate (M-1s-1)
30	303.15	5.2e-05
45	318.15	0.000131
55	328.15	0.000237
sT (K)	1	Estimate of temperature uncertainty.
sk (M-1s-1)	6.3e-06	Average of the three k MCMC uncertainties.
Tmax (K)	328.15
Tmin (K)	303.15
kmax (M-1s-1)	0.000237
kmin (M-1s-1)	5.2e-05
DT (K)	25
DL	1.43757
DH‡ (kJ/mol)	47.49
(sDH‡)2 (kJ/mol)2	13.0064
sDH‡ (kJ/mol)	3.60644
DS‡ (kJ/mol K)	-0.17046
(sDS‡)2 (kJ/mol K)	0.000130681
sDS‡ (kJ/mol K)	0.0114316
Using the error propagation formulas at right from the Girolami paper,
we get DH‡ = 47(4) kJ/mol and DS‡ = -0.171(11) kJ/(mol K).
We used sT = 1.0 K and sk = 0.0000063 M-1s-1 and calculate the
uncertainties for the T = 318.15 K datum.
Arrhenius plot and error propagation for the activation energy for the MeDABCOI + CH3I in methanol-d4 reaction at three temperatures.
The uncertainties in the plot are from the linear least squares fit of the data. The error propagation is from the equation given in Steigel, Sauer, Kleier and Binsch, JACS, 94, 2770-2779 (1972). See the equation below.
DT (K)	25
D (lnk)	1.51682
sT (K)	1	Estimate of temperature uncertainty.
sk (M-1s-1)	6.3e-06	Average of the three k MCMC uncertainties.
T (K)	318.15
k (M-1s-1)	0.000131
DE‡ (kJ/mol)	50.11
(sE‡/DE‡)2	0.00521049
sE‡/DE‡	0.0721837
DE‡ (kJ/mol) * sE‡/DE‡	3.61713
DE‡ =50(4) kJ/mol. The uncertainty is calculated for the T = 318.15 K datum.

## Sheet: BuDABCOI + BuI DMSO
Eyring plot and error propagation for the activation parameters for the BuDABCOI + BuI in DMSO-d6 reaction at three temperatures.
The uncertainties in the plot are from the linear least squares fit of the data. The error propagation is from the equation given in Morse, Spencer, Wilson and Girolami, Organometallics, 13, 1646-1655 (1994). See the equations below.
Gas Constant	0.00831446	kJ/(K mol)
Planck's Constant	6.6207e-34	J sec
Boltzmann's Constant	1.38065e-23	J/K
Temperature (°C)	Temperature (K)	Rate (M-1s-1)
30	303.15	0.00024
50	323.15	0.00083
70	343.15	0.00216
sT (K)	1	Estimate of temperature uncertainty.
sk (M-1s-1)	4e-05	Average of the three k MCMC uncertainties.
Tmax (K)	343.15
Tmin (K)	303.15
kmax (M-1s-1)	0.00216
kmin (M-1s-1)	0.00024
DT (K)	40
DL	2.07328
DH‡ (kJ/mol)	44.9
(sDH‡)2 (kJ/mol)2	5.00261
sDH‡ (kJ/mol)	2.23665
DS‡ (kJ/mol K)	-0.1661
(sDS‡)2 (kJ/mol K)	4.80663e-05
sDS‡ (kJ/mol K)	0.00693298
Using the error propagation formulas at right from the Girolami paper,
we get DH‡ = 45(2) kJ/mol and DS‡ = -0.166(7) kJ/(mol K).
We used sT = 1.0 K and sk = 0.00004 M-1s-1 and calculate the
uncertainties for the T = 323.15 K datum.
Arrhenius plot and error propagation for the activation energy for the BuDABCOI + BuI in DMSO-d6 reaction at three temperatures.
The uncertainties in the plot are from the linear least squares fit of the data. The error propagation is from the equation given in Steigel, Sauer, Kleier and Binsch, JACS, 94, 2770-2779 (1972). See the equation below.
DT (K)	40
D (lnk)	2.19722
sT (K)	1	Estimate of temperature uncertainty.
sk (M-1s-1)	4e-05	Average of the three k MCMC uncertainties.
T (K)	323.15
k (M-1s-1)	0.00083
DE‡ (kJ/mol)	47.58
(sE‡/DE‡)2	0.00221215
sE‡/DE‡	0.0470335
DE‡ (kJ/mol) * sE‡/DE‡	2.23786
DE‡ =48(2) kJ/mol. The uncertainty is calculated for the T = 323.15 K datum.
