# Supplementary material for: An experimental, computational, and uncertainty analysis study of the rates of iodoalkane trapping by DABCO in solution phase organic media
Source: Royal Society of Chemistry journal article supplement (doi:10.1039/d2cp05286e), 2023-01-01
Supplement: d2cp05286e3.xlsx [file d2cp05286e3.xlsx]

## Sheet: CAL 125mM DABCO 50 mM BuI AcN
Calorimetry results using Seteram C80 Calvet calorimeter.
Data recorded by Katherine Koh and analyzed by Tom Autrey. Data recorded May 2021.
Starting DABCO concentration 0.125 M in acetonitrile. Starting butyl iodide concentration 0.05 M in acetonitrile.
Experiment set temperature 30.0 C.
Data analyzed using Berkeley Madonna numerical differential equation solver.
The fit enthalpy change is -121.7 kJ/mol and the fit kinetic rate is 0.0164 M-1 sec-1.
Below, the total number of points in this data sheet has been reduced by 1/16 from the				All experimental and fit data points are given below.
original to make the number of measured heat flow points on the plot less crowed.
TIME (sec)	MEAS. HEAT (mW)	FIT HEAT (mW)		TIME (sec)	MEAS. HEAT (mW)	FIT HEAT (mW)
186	0.0565882	0		186	0.0565882	0
186.066	0.0565865	2e-08		186	0.0565882	0
199.049	0.0635577	0.0934521		186	0.0565882	0
215.049	0.590393	0.622346		186	0.0565882	0
231.049	1.62779	1.48097		186	0.0565882	0
247.049	2.69638	2.46802		186	0.0565882	0
263.049	3.71189	3.46158		186	0.0565882	0
279.049	4.61895	4.40331		186	0.0565882	0
295.049	5.44792	5.2696		186	0.0565882	0
311.049	6.17038	6.05359		186.001	0.0565882	0
327.049	6.82591	6.75605		186.001	0.0565882	0
343.049	7.40613	7.38095		186.002	0.0565882	0
359.049	7.93361	7.93347		186.004	0.0565881	0
375.049	8.38607	8.41905		186.008	0.056588	0
391.049	8.79234	8.84304		186.016	0.0565878	0
407.049	9.13452	9.21051		186.033	0.0565874	0
423.049	9.43803	9.52619		186.066	0.0565865	2e-08
439.049	9.69009	9.79449		186.131	0.0565847	1.5e-07
455.049	9.91181	10.0195		186.262	0.0565812	1.18e-06
471.049	10.0891	10.2049		186.524	0.0565741	9.39e-06
487.049	10.2412	10.3542		187.049	0.05656	7.369e-05
503.049	10.3582	10.4706		188.049	0.0565331	0.00052998
519.049	10.4521	10.5571		189.049	0.0564351	0.00168489
535.049	10.5126	10.6163		190.049	0.0562786	0.00380777
551.049	10.5566	10.6508		191.049	0.056122	0.00712627
567.049	10.5708	10.6629		192.049	0.0559442	0.0118308
583.049	10.5743	10.6547		193.049	0.0557549	0.0180785
599.049	10.5501	10.6281		194.049	0.0555656	0.0259971
615.049	10.5185	10.585		195.049	0.0556027	0.0356882
631.049	10.4657	10.5271		196.049	0.0557158	0.0472301
647.049	10.4049	10.4558		197.049	0.0558289	0.0606808
663.049	10.3283	10.3726		198.049	0.059386	0.07608
679.049	10.2457	10.2788		199.049	0.0635577	0.0934521
695.049	10.1493	10.1755		200.049	0.0677295	0.112807
711.049	10.0473	10.0639		201.049	0.0801689	0.134143
727.049	9.9322	9.94495		202.049	0.0930566	0.157449
743.049	9.81661	9.81957		203.049	0.10658	0.182702
759.049	9.68883	9.68861		204.049	0.132551	0.209874
775.049	9.56248	9.55285		205.049	0.158521	0.238929
791.049	9.42827	9.41301		206.049	0.186225	0.269828
807.049	9.29275	9.26973		207.049	0.223858	0.302523
823.049	9.14762	9.1236		208.049	0.261491	0.336965
839.049	9.00671	8.97517		209.049	0.300506	0.373103
855.049	8.85932	8.82493		210.049	0.343697	0.41088
871.049	8.71593	8.67334		211.049	0.386888	0.450242
887.049	8.56591	8.5208		212.049	0.432837	0.491128
903.049	8.41803	8.36769		213.049	0.48394	0.533481
919.049	8.26613	8.21435		214.049	0.535043	0.57724
935.049	8.11657	8.06107		215.049	0.590393	0.622346
951.049	7.96514	7.90815		216.049	0.650963	0.668739
967.049	7.81633	7.75583		217.049	0.711532	0.71636
983.049	7.66581	7.60433		218.049	0.773748	0.76515
999.049	7.51674	7.45386		219.049	0.837317	0.815051
1015.05	7.36902	7.30459		220.049	0.900886	0.866006
1031.05	7.22263	7.15669		221.049	0.962564	0.917959
1047.05	7.07449	7.01031		222.049	1.02322	0.970855
1063.05	6.9328	6.86555		223.049	1.08387	1.02464
1079.05	6.7894	6.72255		224.049	1.14855	1.07926
1095.05	6.64989	6.5814		225.049	1.21458	1.13467
1111.05	6.50851	6.44217		226.049	1.28061	1.19082
1127.05	6.37155	6.30494		227.049	1.35013	1.24765
1143.05	6.2351	6.16978		228.049	1.42026	1.30513
1159.05	6.10281	6.03673		229.049	1.4904	1.3632
1175.05	5.96979	5.90585		230.049	1.55913	1.42183
1191.05	5.83999	5.77715		231.049	1.62779	1.48097
1207.05	5.71167	5.65068		232.049	1.69623	1.54058
1223.05	5.58714	5.52644		233.049	1.76026	1.60062
1239.05	5.46361	5.40446		234.049	1.82428	1.66106
1255.05	5.34291	5.28474		235.049	1.8891	1.72185
1271.05	5.2234	5.16729		236.049	1.95843	1.78297
1287.05	5.10674	5.0521		237.049	2.02777	1.84438
1303.05	4.99224	4.93918		238.049	2.09729	1.90605
1319.05	4.8792	4.8285		239.049	2.16737	1.96794
1335.05	4.76892	4.72005		240.049	2.23746	2.03004
1351.05	4.661	4.61383		241.049	2.30622	2.0923
1367.05	4.55495	4.50981		242.049	2.37251	2.1547
1383.05	4.45117	4.40796		243.049	2.43879	2.21723
1399.05	4.34882	4.30828		244.049	2.5038	2.27984
1415.05	4.24797	4.21072		245.049	2.56724	2.34253
1431.05	4.1497	4.11528		246.049	2.63067	2.40526
1447.05	4.05379	4.0219		247.049	2.69638	2.46802
1463.05	3.9612	3.93058		248.049	2.76396	2.53078
1479.05	3.8691	3.84127		249.049	2.83154	2.59353
1495.05	3.77991	3.75395		250.049	2.89867	2.65624
1511.05	3.69134	3.66858		251.049	2.96556	2.71891
1527.05	3.60683	3.58513		252.049	3.03245	2.7815
1543.05	3.52086	3.50356		253.049	3.09481	2.84402
1559.05	3.43954	3.42385		254.049	3.15565	2.90643
1575.05	3.35944	3.34595		255.049	3.21649	2.96873
1591.05	3.28158	3.26984		256.049	3.27747	3.03091
1607.05	3.2034	3.19548		257.049	3.33848	3.09294
1623.05	3.12914	3.12283		258.049	3.39948	3.15482
1639.05	3.05538	3.05186		259.049	3.46256	3.21654
1655.05	2.98534	2.98254		260.049	3.52575	3.27809
1671.05	2.91401	2.91483		261.049	3.58886	3.33945
1687.05	2.84728	2.8487		262.049	3.65038	3.40061
1703.05	2.77919	2.78412		263.049	3.71189	3.46158
1719.05	2.71482	2.72104		264.049	3.77251	3.52232
1735.05	2.65007	2.65945		265.049	3.82796	3.58285
1751.05	2.58892	2.5993		266.049	3.88341	3.64315
1767.05	2.52887	2.54056		267.049	3.9397	3.70321
1783.05	2.47018	2.48321		268.049	3.99851	3.76302
1799.05	2.41143	2.4272		269.049	4.05732	3.82259
1815.05	2.35635	2.37252		270.049	4.11625	3.8819
1831.05	2.30008	2.31912		271.049	4.17538	3.94095
1847.05	2.24662	2.26699		272.049	4.23452	3.99973
1863.05	2.19426	2.21608		273.049	4.29262	4.05823
1879.05	2.14343	2.16638		274.049	4.34946	4.11646
1895.05	2.09249	2.11784		275.049	4.4063	4.17441
1911.05	2.04475	2.07046		276.049	4.46048	4.23208
1927.05	1.99624	2.02419		277.049	4.51246	4.28945
1943.05	1.95015	1.97902		278.049	4.56445	4.34653
1959.05	1.90527	1.93491		279.049	4.61895	4.40331
1975.05	1.85974	1.89184		280.049	4.67481	4.45979
1991.05	1.81819	1.84978		281.049	4.73066	4.51597
2007.05	1.77465	1.80871		282.049	4.78608	4.57185
2023.05	1.73433	1.76861		283.049	4.84135	4.62742
2039.05	1.69327	1.72946		284.049	4.89662	4.68267
2055.05	1.65496	1.69122		285.049	4.94773	4.73762
2071.05	1.61634	1.65388		286.049	4.9981	4.79225
2087.05	1.58001	1.61742		287.049	5.04847	4.84657
2103.05	1.54366	1.58181		288.049	5.09716	4.90057
2119.05	1.5075	1.54703		289.049	5.14576	4.95425
2135.05	1.4731	1.51307		290.049	5.19448	5.00761
2151.05	1.43974	1.4799		291.049	5.2456	5.06065
2167.05	1.4062	1.4475		292.049	5.29672	5.11337
2183.05	1.37382	1.41586		293.049	5.34769	5.16577
2199.05	1.34289	1.38495		294.049	5.39781	5.21784
2215.05	1.31227	1.35476		295.049	5.44792	5.2696
2231.05	1.28085	1.32527		296.049	5.49667	5.32102
2247.05	1.25152	1.29647		297.049	5.54132	5.37213
2263.05	1.22319	1.26833		298.049	5.58597	5.42291
2279.05	1.19518	1.24084		299.049	5.6313	5.47336
2295.05	1.16883	1.21398		300.049	5.67791	5.5235
2311.05	1.14291	1.18774		301.049	5.72452	5.5733
2327.05	1.11706	1.16211		302.049	5.77156	5.62278
2343.05	1.0919	1.13706		303.049	5.81913	5.67194
2359.05	1.06725	1.11259		304.049	5.86669	5.72078
2375.05	1.04275	1.08867		305.049	5.91305	5.76929
2391.05	1.01891	1.06531		306.049	5.95842	5.81748
2407.05	0.995446	1.04247		307.049	6.00378	5.86534
2423.05	0.973534	1.02016		308.049	6.0461	5.91289
2439.05	0.952098	0.998349		309.049	6.08676	5.96011
2455.05	0.931579	0.977036		310.049	6.12742	6.00701
2471.05	0.910942	0.956206		311.049	6.17038	6.05359
2487.05	0.890241	0.935847		312.049	6.21411	6.09985
2503.05	0.870249	0.915947		313.049	6.25784	6.14579
2519.05	0.851423	0.896496		314.049	6.30131	6.19142
2535.05	0.832171	0.877482		315.049	6.34474	6.23673
2551.05	0.813443	0.858896		316.049	6.38817	6.28172
2567.05	0.79518	0.840725		317.049	6.4285	6.3264
2583.05	0.778757	0.822962		318.049	6.46865	6.37076
2599.05	0.760338	0.805595		319.049	6.5087	6.41481
2615.05	0.744202	0.788616		320.049	6.54667	6.45854
2631.05	0.727861	0.772015		321.049	6.58464	6.50197
2647.05	0.712011	0.755783		322.049	6.62304	6.54508
2663.05	0.696421	0.73991		323.049	6.66391	6.58789
2679.05	0.680812	0.72439		324.049	6.70478	6.63039
2695.05	0.664982	0.709213		325.049	6.74549	6.67258
2711.05	0.650905	0.69437		326.049	6.7857	6.71447
2727.05	0.636007	0.679855		327.049	6.82591	6.75605
2743.05	0.622432	0.66566		328.049	6.86454	6.79733
2759.05	0.607644	0.651776		329.049	6.90021	6.8383
2775.05	0.594773	0.638196		330.049	6.93588	6.87898
2791.05	0.581842	0.624914		331.049	6.9721	6.91935
2807.05	0.569002	0.611922		332.049	7.009	6.95943
2823.05	0.557776	0.599214		333.049	7.0459	6.99921
2839.05	0.545304	0.586783		334.049	7.08345	7.0387
2855.05	0.533194	0.574622		335.049	7.12156	7.07789
2871.05	0.520571	0.562725		336.049	7.15966	7.11678
2887.05	0.508554	0.551086		337.049	7.19725	7.15539
2903.05	0.496969	0.539699		338.049	7.23454	7.1937
2919.05	0.48722	0.528559		339.049	7.27184	7.23172
2935.05	0.476178	0.517659		340.049	7.30568	7.26946
2951.05	0.465719	0.506993		341.049	7.33835	7.30691
2967.05	0.455064	0.496558		342.049	7.37102	7.34407
2983.05	0.445655	0.486346		343.049	7.40613	7.38095
2999.05	0.435653	0.476354		344.049	7.44167	7.41755
3015.05	0.426561	0.466575		345.049	7.47721	7.45386
3031.05	0.416349	0.457006		346.049	7.51241	7.4899
3047.05	0.407737	0.447641		347.049	7.54758	7.52565
3063.05	0.398825	0.438476		348.049	7.58264	7.56113
3079.05	0.389593	0.429507		349.049	7.61541	7.59633
3095.05	0.381332	0.420728		350.049	7.64818	7.63126
3111.05	0.372443	0.412135		351.049	7.68054	7.66592
3127.05	0.364752	0.403725		352.049	7.71052	7.7003
3143.05	0.356156	0.395493		353.049	7.7405	7.73441
3159.05	0.348755	0.387435		354.049	7.77113	7.76825
3175.05	0.340888	0.379548		355.049	7.80376	7.80182
3191.05	0.333114	0.371827		356.049	7.83638	7.83513
3207.05	0.32574	0.364268		357.049	7.86891	7.86817
3223.05	0.319003	0.356869		358.049	7.90126	7.90095
3239.05	0.310887	0.349625		359.049	7.93361	7.93347
3255.05	0.304352	0.342534		360.049	7.96425	7.96572
3271.05	0.296865	0.335591		361.049	7.99277	7.99771
3287.05	0.291417	0.328793		362.049	8.02129	8.02945
3303.05	0.284282	0.322138		363.049	8.04979	8.06092
3319.05	0.277842	0.315622		364.049	8.07826	8.09214
3335.05	0.271151	0.309241		365.049	8.10674	8.12311
3351.05	0.265302	0.302994		366.049	8.13623	8.15382
3367.05	0.258057	0.296877		367.049	8.16627	8.18428
3383.05	0.253201	0.290887		368.049	8.19632	8.21449
3399.05	0.247061	0.285022		369.049	8.22584	8.24445
3415.05	0.241985	0.279278		370.049	8.25519	8.27417
3431.05	0.236725	0.273654		371.049	8.28454	8.30363
3447.05	0.230082	0.268145		372.049	8.30986	8.33285
3463.05	0.224325	0.262751		373.049	8.33447	8.36182
3479.05	0.219857	0.257469		374.049	8.35907	8.39056
3495.05	0.214856	0.252295		375.049	8.38607	8.41905
3511.05	0.209053	0.247228		376.049	8.41319	8.4473
3527.05	0.205045	0.242266		377.049	8.44032	8.47531
3543.05	0.199654	0.237406		378.049	8.46762	8.50308
3559.05	0.19421	0.232646		379.049	8.49491	8.53062
3575.05	0.189648	0.227983		380.049	8.52196	8.55792
3591.05	0.184832	0.223416		381.049	8.54761	8.58498
				382.049	8.57326	8.61182
				383.049	8.59815	8.63842
				384.049	8.62071	8.66479
				385.049	8.64328	8.69093
				386.049	8.66677	8.71684
				387.049	8.69199	8.74253
				388.049	8.71722	8.76799
				389.049	8.74234	8.79323
				390.049	8.76734	8.81825
				391.049	8.79234	8.84304
				392.049	8.81558	8.86761
				393.049	8.83736	8.89196
				394.049	8.85915	8.9161
				395.049	8.88066	8.94001
				396.049	8.90203	8.96371
				397.049	8.92339	8.9872
				398.049	8.94624	9.01047
				399.049	8.96958	9.03353
				400.049	8.99293	9.05638
				401.049	9.01537	9.07902
				402.049	9.03764	9.10145
				403.049	9.05992	9.12367
				404.049	9.07817	9.14569
				405.049	9.09621	9.1675
				406.049	9.11435	9.1891
				407.049	9.13452	9.21051
				408.049	9.15469	9.23171
				409.049	9.17498	9.25271
				410.049	9.19594	9.2735
				411.049	9.2169	9.2941
				412.049	9.23749	9.31451
				413.049	9.25694	9.33471
				414.049	9.27638	9.35472
				415.049	9.29467	9.37454
				416.049	9.31081	9.39416
				417.049	9.32694	9.41359
				418.049	9.34438	9.43283
				419.049	9.36343	9.45188
				420.049	9.38248	9.47074
				421.049	9.40119	9.48941
				422.049	9.41961	9.50789
				423.049	9.43803	9.52619
				424.049	9.45481	9.5443
				425.049	9.47068	9.56223
				426.049	9.48655	9.57998
				427.049	9.50176	9.59754
				428.049	9.51674	9.61493
				429.049	9.53172	9.63213
				430.049	9.54863	9.64915
				431.049	9.56588	9.666
				432.049	9.58312	9.68267
				433.049	9.60027	9.69916
				434.049	9.6174	9.71548
				435.049	9.63436	9.73163
				436.049	9.64782	9.7476
				437.049	9.66127	9.7634
				438.049	9.67497	9.77903
				439.049	9.69009	9.79449
				440.049	9.70521	9.80978
				441.049	9.72045	9.8249
				442.049	9.73607	9.83985
				443.049	9.75169	9.85464
				444.049	9.76684	9.86926
				445.049	9.78114	9.88372
				446.049	9.79544	9.89801
				447.049	9.80823	9.91215
				448.049	9.81915	9.92612
				449.049	9.83008	9.93993
				450.049	9.84253	9.95358
				451.049	9.85625	9.96707
				452.049	9.86997	9.9804
				453.049	9.88385	9.99358
				454.049	9.89783	10.0066
				455.049	9.91181	10.0195
				456.049	9.92411	10.0322
				457.049	9.93586	10.0447
				458.049	9.9476	10.0571
				459.049	9.95823	10.0694
				460.049	9.96865	10.0815
				461.049	9.97908	10.0934
				462.049	9.99152	10.1052
				463.049	10.0041	10.1169
				464.049	10.0166	10.1284
				465.049	10.0289	10.1398
				466.049	10.0412	10.151
				467.049	10.0529	10.162
				468.049	10.0615	10.173
				469.049	10.0701	10.1837
				470.049	10.079	10.1944
				471.049	10.0891	10.2049
				472.049	10.0991	10.2152
				473.049	10.1095	10.2254
				474.049	10.1203	10.2355
				475.049	10.131	10.2455
				476.049	10.1415	10.2553
				477.049	10.1514	10.2649
				478.049	10.1614	10.2744
				479.049	10.1696	10.2838
				480.049	10.1765	10.2931
				481.049	10.1833	10.3022
				482.049	10.1921	10.3112
				483.049	10.2021	10.3201
				484.049	10.212	10.3288
				485.049	10.2218	10.3374
				486.049	10.2315	10.3459
				487.049	10.2412	10.3542
				488.049	10.2492	10.3624
				489.049	10.257	10.3705
				490.049	10.2647	10.3784
				491.049	10.2712	10.3863
				492.049	10.2777	10.394
				493.049	10.2842	10.4015
				494.049	10.2929	10.409
				495.049	10.3016	10.4163
				496.049	10.3102	10.4235
				497.049	10.3185	10.4306
				498.049	10.3269	10.4376
				499.049	10.3345	10.4444
				500.049	10.3401	10.4511
				501.049	10.3458	10.4577
				502.049	10.3517	10.4642
				503.049	10.3582	10.4706
				504.049	10.3647	10.4769
				505.049	10.3715	10.483
				506.049	10.3788	10.489
				507.049	10.386	10.4949
				508.049	10.3929	10.5007
				509.049	10.3994	10.5064
				510.049	10.4059	10.5119
				511.049	10.4104	10.5174
				512.049	10.4139	10.5227
				513.049	10.4173	10.528
				514.049	10.4226	10.5331
				515.049	10.4285	10.5381
				516.049	10.4344	10.543
				517.049	10.4403	10.5478
				518.049	10.4462	10.5525
				519.049	10.4521	10.5571
				520.049	10.4565	10.5615
				521.049	10.4608	10.5659
				522.049	10.4651	10.5702
				523.049	10.4684	10.5743
				524.049	10.4717	10.5784
				525.049	10.4752	10.5823
				526.049	10.4806	10.5862
				527.049	10.4859	10.5899
				528.049	10.491	10.5936
				529.049	10.4958	10.5971
				530.049	10.5005	10.6006
				531.049	10.5042	10.6039
				532.049	10.506	10.6071
				533.049	10.5078	10.6103
				534.049	10.51	10.6133
				535.049	10.5126	10.6163
				536.049	10.5151	10.6191
				537.049	10.5183	10.6219
				538.049	10.522	10.6246
				539.049	10.5257	10.6271
				540.049	10.5293	10.6296
				541.049	10.5329	10.632
				542.049	10.5365	10.6343
				543.049	10.5378	10.6365
				544.049	10.5383	10.6386
				545.049	10.5389	10.6406
				546.049	10.5415	10.6425
				547.049	10.5446	10.6444
				548.049	10.5476	10.6461
				549.049	10.5506	10.6477
				550.049	10.5537	10.6493
				551.049	10.5566	10.6508
				552.049	10.5581	10.6522
				553.049	10.5595	10.6535
				554.049	10.5608	10.6547
				555.049	10.5613	10.6558
				556.049	10.5617	10.6569
				557.049	10.5626	10.6578
				558.049	10.5648	10.6587
				559.049	10.567	10.6595
				560.049	10.569	10.6602
				561.049	10.5706	10.6608
				562.049	10.5722	10.6614
				563.049	10.5727	10.6618
				564.049	10.5717	10.6622
				565.049	10.5708	10.6625
				566.049	10.5705	10.6627
				567.049	10.5708	10.6629
				568.049	10.5711	10.6629
				569.049	10.5719	10.6629
				570.049	10.5729	10.6628
				571.049	10.574	10.6626
				572.049	10.5746	10.6624
				573.049	10.5752	10.6621
				574.049	10.5757	10.6617
				575.049	10.5744	10.6612
				576.049	10.5727	10.6606
				577.049	10.5711	10.66
				578.049	10.5717	10.6593
				579.049	10.5725	10.6585
				580.049	10.5732	10.6576
				581.049	10.5737	10.6567
				582.049	10.5741	10.6557
				583.049	10.5743	10.6547
				584.049	10.573	10.6535
				585.049	10.5717	10.6523
				586.049	10.5702	10.651
				587.049	10.568	10.6497
				588.049	10.5659	10.6482
				589.049	10.5643	10.6467
				590.049	10.5638	10.6452
				591.049	10.5632	10.6436
				592.049	10.5627	10.6419
				593.049	10.5623	10.6401
				594.049	10.5619	10.6383
				595.049	10.5601	10.6364
				596.049	10.557	10.6344
				597.049	10.5539	10.6324
				598.049	10.5518	10.6303
				599.049	10.5501	10.6281
				600.049	10.5485	10.6259
				601.049	10.5472	10.6236
				602.049	10.546	10.6212
				603.049	10.5448	10.6188
				604.049	10.5434	10.6163
				605.049	10.5419	10.6138
				606.049	10.5404	10.6112
				607.049	10.5369	10.6085
				608.049	10.5332	10.6058
				609.049	10.5296	10.603
				610.049	10.5279	10.6002
				611.049	10.5263	10.5973
				612.049	10.5246	10.5943
				613.049	10.5227	10.5913
				614.049	10.5208	10.5882
				615.049	10.5185	10.585
				616.049	10.5151	10.5818
				617.049	10.5117	10.5786
				618.049	10.5081	10.5753
				619.049	10.504	10.5719
				620.049	10.5	10.5685
				621.049	10.4968	10.565
				622.049	10.4946	10.5614
				623.049	10.4924	10.5578
				624.049	10.4901	10.5542
				625.049	10.4878	10.5505
				626.049	10.4854	10.5467
				627.049	10.4817	10.5429
				628.049	10.4772	10.539
				629.049	10.4728	10.5351
				630.049	10.4691	10.5311
				631.049	10.4657	10.5271
				632.049	10.4623	10.523
				633.049	10.4594	10.5189
				634.049	10.4566	10.5147
				635.049	10.4538	10.5105
				636.049	10.4503	10.5062
				637.049	10.4467	10.5019
				638.049	10.4431	10.4975
				639.049	10.4374	10.493
				640.049	10.4317	10.4886
				641.049	10.4264	10.484
				642.049	10.4229	10.4794
				643.049	10.4194	10.4748
				644.049	10.4159	10.4701
				645.049	10.4124	10.4654
				646.049	10.4089	10.4606
				647.049	10.4049	10.4558
				648.049	10.4002	10.451
				649.049	10.3955	10.4461
				650.049	10.3905	10.4411
				651.049	10.3851	10.4361
				652.049	10.3796	10.431
				653.049	10.3749	10.426
				654.049	10.3708	10.4208
				655.049	10.3667	10.4156
				656.049	10.3627	10.4104
				657.049	10.3586	10.4051
				658.049	10.3546	10.3998
				659.049	10.3492	10.3945
				660.049	10.3434	10.3891
				661.049	10.3376	10.3836
				662.049	10.3329	10.3782
				663.049	10.3283	10.3726
				664.049	10.3237	10.3671
				665.049	10.3192	10.3615
				666.049	10.3146	10.3558
				667.049	10.31	10.3501
				668.049	10.3052	10.3444
				669.049	10.3004	10.3386
				670.049	10.2953	10.3328
				671.049	10.2885	10.327
				672.049	10.2817	10.3211
				673.049	10.2755	10.3152
				674.049	10.2706	10.3092
				675.049	10.2658	10.3032
				676.049	10.261	10.2971
				677.049	10.256	10.2911
				678.049	10.2511	10.285
				679.049	10.2457	10.2788
				680.049	10.2397	10.2726
				681.049	10.2337	10.2664
				682.049	10.2274	10.2601
				683.049	10.2208	10.2538
				684.049	10.2143	10.2475
				685.049	10.2087	10.2411
				686.049	10.2035	10.2347
				687.049	10.1984	10.2283
				688.049	10.1931	10.2218
				689.049	10.1878	10.2153
				690.049	10.1824	10.2087
				691.049	10.1755	10.2022
				692.049	10.1682	10.1956
				693.049	10.161	10.1889
				694.049	10.1551	10.1822
				695.049	10.1493	10.1755
				696.049	10.1436	10.1688
				697.049	10.1379	10.162
				698.049	10.1323	10.1552
				699.049	10.1266	10.1484
				700.049	10.1203	10.1415
				701.049	10.1141	10.1346
				702.049	10.1075	10.1277
				703.049	10.0995	10.1207
				704.049	10.0915	10.1137
				705.049	10.0842	10.1067
				706.049	10.0782	10.0996
				707.049	10.0721	10.0925
				708.049	10.0661	10.0854
				709.049	10.06	10.0783
				710.049	10.054	10.0711
				711.049	10.0473	10.0639
				712.049	10.04	10.0567
				713.049	10.0328	10.0494
				714.049	10.0254	10.0421
				715.049	10.0179	10.0348
				716.049	10.0104	10.0275
				717.049	10.0039	10.0201
				718.049	9.99772	10.0127
				719.049	9.99152	10.0053
				720.049	9.98484	9.99783
				721.049	9.97808	9.99036
				722.049	9.97131	9.98285
				723.049	9.963	9.97532
				724.049	9.95461	9.96777
				725.049	9.94629	9.96019
				726.049	9.93925	9.95258
				727.049	9.9322	9.94495
				728.049	9.9252	9.93729
				729.049	9.91845	9.92961
				730.049	9.91169	9.9219
				731.049	9.90488	9.91417
				732.049	9.89791	9.90641
				733.049	9.89094	9.89863
				734.049	9.88342	9.89083
				735.049	9.87485	9.883
				736.049	9.86629	9.87515
				737.049	9.85854	9.86728
				738.049	9.85181	9.85938
				739.049	9.84508	9.85146
				740.049	9.83822	9.84352
				741.049	9.83125	9.83556
				742.049	9.82428	9.82757
				743.049	9.81661	9.81957
				744.049	9.80857	9.81154
				745.049	9.80052	9.80348
				746.049	9.79245	9.79541
				747.049	9.78436	9.78732
				748.049	9.77628	9.7792
				749.049	9.76886	9.77107
				750.049	9.76157	9.76291
				751.049	9.75427	9.75473
				752.049	9.74682	9.74654
				753.049	9.73936	9.73832
				754.049	9.73183	9.73008
				755.049	9.72277	9.72183
				756.049	9.7137	9.71355
				757.049	9.7048	9.70526
				758.049	9.69682	9.69694
				759.049	9.68883	9.68861
				760.049	9.68094	9.68026
				761.049	9.67333	9.67189
				762.049	9.66572	9.6635
				763.049	9.65803	9.65509
				764.049	9.65019	9.64667
				765.049	9.64235	9.63822
				766.049	9.63391	9.62976
				767.049	9.62473	9.62129
				768.049	9.61556	9.61279
				769.049	9.60743	9.60428
				770.049	9.60017	9.59575
				771.049	9.59291	9.5872
				772.049	9.58554	9.57864
				773.049	9.57813	9.57006
				774.049	9.57071	9.56147
				775.049	9.56248	9.55285
				776.049	9.55397	9.54423
				777.049	9.54546	9.53558
				778.049	9.53684	9.52692
				779.049	9.52819	9.51825
				780.049	9.51954	9.50956
				781.049	9.51177	9.50086
				782.049	9.50405	9.49214
				783.049	9.49632	9.4834
				784.049	9.48845	9.47465
				785.049	9.48057	9.46589
				786.049	9.47249	9.45711
				787.049	9.46321	9.44832
				788.049	9.45394	9.43951
				789.049	9.4449	9.43069
				790.049	9.43659	9.42186
				791.049	9.42827	9.41301
				792.049	9.42011	9.40415
				793.049	9.41222	9.39528
				794.049	9.40433	9.38639
				795.049	9.39622	9.37749
				796.049	9.38784	9.36858
				797.049	9.37947	9.35965
				798.049	9.37042	9.35071
				799.049	9.36083	9.34176
				800.049	9.35124	9.3328
				801.049	9.34268	9.32382
				802.049	9.33468	9.31484
				803.049	9.32667	9.30584
				804.049	9.31845	9.29683
				805.049	9.31016	9.28781
				806.049	9.30186	9.27877
				807.049	9.29275	9.26973
				808.049	9.28348	9.26067
				809.049	9.27422	9.25161
				810.049	9.26463	9.24253
				811.049	9.25502	9.23344
				812.049	9.24547	9.22434
				813.049	9.23706	9.21523
				814.049	9.22865	9.20611
				815.049	9.22023	9.19698
				816.049	9.21172	9.18785
				817.049	9.20322	9.1787
				818.049	9.19437	9.16954
				819.049	9.1845	9.16037
				820.049	9.17463	9.15119
				821.049	9.16515	9.142
				822.049	9.15639	9.13281
				823.049	9.14762	9.1236
				824.049	9.13905	9.11439
				825.049	9.13072	9.10516
				826.049	9.1224	9.09593
				827.049	9.11398	9.08669
				828.049	9.1055	9.07744
				829.049	9.09701	9.06818
				830.049	9.08747	9.05892
				831.049	9.07737	9.04964
				832.049	9.06727	9.04036
				833.049	9.05844	9.03107
				834.049	9.05005	9.02177
				835.049	9.04165	9.01247
				836.049	9.03312	9.00315
				837.049	9.02457	8.99383
				838.049	9.01602	8.98451
				839.049	9.00671	8.97517
				840.049	8.99735	8.96583
				841.049	8.98797	8.95648
				842.049	8.97804	8.94712
				843.049	8.96812	8.93776
				844.049	8.95839	8.92839
				845.049	8.94979	8.91902
				846.049	8.94119	8.90964
				847.049	8.93259	8.90025
				848.049	8.92402	8.89085
				849.049	8.91545	8.88145
				850.049	8.90642	8.87205
				851.049	8.89654	8.86264
				852.049	8.88665	8.85322
				853.049	8.87719	8.8438
				854.049	8.86826	8.83437
				855.049	8.85932	8.82493
				856.049	8.85049	8.81549
				857.049	8.84174	8.80605
				858.049	8.833	8.7966
				859.049	8.82416	8.78715
				860.049	8.81526	8.77769
				861.049	8.80637	8.76822
				862.049	8.79662	8.75875
				863.049	8.78659	8.74928
				864.049	8.77656	8.7398
				865.049	8.76804	8.73032
				866.049	8.7598	8.72083
				867.049	8.75156	8.71134
				868.049	8.74289	8.70185
				869.049	8.73419	8.69235
				870.049	8.72545	8.68285
				871.049	8.71593	8.67334
				872.049	8.70641	8.66383
				873.049	8.69685	8.65432
				874.049	8.68711	8.6448
				875.049	8.67736	8.63528
				876.049	8.66789	8.62576
				877.049	8.65926	8.61623
				878.049	8.65063	8.6067
				879.049	8.6419	8.59716
				880.049	8.63297	8.58763
				881.049	8.62405	8.57809
				882.049	8.61458	8.56855
				883.049	8.60444	8.559
				884.049	8.59429	8.54946
				885.049	8.58459	8.53991
				886.049	8.57525	8.53036
				887.049	8.56591	8.5208
				888.049	8.55685	8.51125
				889.049	8.54794	8.50169
				890.049	8.53904	8.49213
				891.049	8.52995	8.48256
				892.049	8.52079	8.473
				893.049	8.51164	8.46343
				894.049	8.50138	8.45387
				895.049	8.49092	8.4443
				896.049	8.48046	8.43472
				897.049	8.4716	8.42515
				898.049	8.46282	8.41558
				899.049	8.45405	8.406
				900.049	8.44522	8.39643
				901.049	8.4364	8.38685
				902.049	8.42749	8.37727
				903.049	8.41803	8.36769
				904.049	8.40858	8.35811
				905.049	8.39898	8.34853
				906.049	8.38898	8.33895
				907.049	8.37898	8.32936
				908.049	8.36936	8.31978
				909.049	8.36046	8.3102
				910.049	8.35155	8.30061
				911.049	8.34261	8.29103
				912.049	8.33361	8.28144
				913.049	8.32461	8.27186
				914.049	8.31504	8.26227
				915.049	8.30499	8.25269
				916.049	8.29494	8.2431
				917.049	8.28522	8.23352
				918.049	8.27568	8.22393
				919.049	8.26613	8.21435
				920.049	8.25707	8.20476
				921.049	8.24816	8.19518
				922.049	8.23926	8.18559
				923.049	8.23013	8.17601
				924.049	8.22096	8.16643
				925.049	8.21179	8.15684
				926.049	8.20136	8.14726
				927.049	8.19086	8.13768
				928.049	8.18043	8.1281
				929.049	8.17138	8.11852
				930.049	8.16233	8.10895
				931.049	8.15329	8.09937
				932.049	8.14426	8.08979
				933.049	8.13524	8.08022
				934.049	8.12609	8.07064
				935.049	8.11657	8.06107
				936.049	8.10705	8.0515
				937.049	8.09744	8.04193
				938.049	8.08766	8.03237
				939.049	8.07787	8.0228
				940.049	8.06856	8.01323
				941.049	8.05982	8.00367
				942.049	8.05108	7.99411
				943.049	8.04222	7.98455
				944.049	8.03326	7.97499
				945.049	8.0243	7.96544
				946.049	8.01454	7.95589
				947.049	8.00435	7.94633
				948.049	7.99415	7.93678
				949.049	7.98438	7.92724
				950.049	7.97476	7.91769
				951.049	7.96514	7.90815
				952.049	7.95592	7.89861
				953.049	7.94678	7.88907
				954.049	7.93764	7.87954
				955.049	7.92852	7.87
				956.049	7.9194	7.86047
				957.049	7.91023	7.85095
				958.049	7.8999	7.84142
				959.049	7.88957	7.8319
				960.049	7.87945	7.82238
				961.049	7.87054	7.81286
				962.049	7.86163	7.80335
				963.049	7.85271	7.79384
				964.049	7.84377	7.78433
				965.049	7.83482	7.77483
				966.049	7.82572	7.76533
				967.049	7.81633	7.75583
				968.049	7.80694	7.74633
				969.049	7.79735	7.73684
				970.049	7.78749	7.72735
				971.049	7.77764	7.71787
				972.049	7.76826	7.70839
				973.049	7.75927	7.69891
				974.049	7.75027	7.68943
				975.049	7.74132	7.67996
				976.049	7.73238	7.67049
				977.049	7.72344	7.66103
				978.049	7.71384	7.65157
				979.049	7.70401	7.64211
				980.049	7.69419	7.63266
				981.049	7.68469	7.62321
				982.049	7.67525	7.61377
				983.049	7.66581	7.60433
				984.049	7.65679	7.59489
				985.049	7.6478	7.58546
				986.049	7.6388	7.57603
				987.049	7.62964	7.56661
				988.049	7.62048	7.55719
				989.049	7.61115	7.54777
				990.049	7.60079	7.53836
				991.049	7.59043	7.52895
				992.049	7.58038	7.51955
				993.049	7.57128	7.51015
				994.049	7.56217	7.50076
				995.049	7.55313	7.49137
				996.049	7.54421	7.48198
				997.049	7.53529	7.4726
				998.049	7.52615	7.46323
				999.049	7.51674	7.45386
				1000.05	7.50733	7.44449
				1001.05	7.49773	7.43513
				1002.05	7.48797	7.42577
				1003.05	7.47822	7.41642
				1004.05	7.46922	7.40707
				1005.05	7.46063	7.39773
				1006.05	7.45204	7.38839
				1007.05	7.44318	7.37906
				1008.05	7.43422	7.36974
				1009.05	7.42527	7.36041
				1010.05	7.41572	7.3511
				1011.05	7.40607	7.34178
				1012.05	7.39642	7.33248
				1013.05	7.38726	7.32318
				1014.05	7.37813	7.31388
				1015.05	7.36902	7.30459
				1016.05	7.3604	7.29531
				1017.05	7.35178	7.28603
				1018.05	7.34311	7.27675
				1019.05	7.33415	7.26748
				1020.05	7.32519	7.25822
				1021.05	7.31596	7.24896
				1022.05	7.30592	7.23971
				1023.05	7.29588	7.23046
				1024.05	7.28624	7.22122
				1025.05	7.27733	7.21198
				1026.05	7.26842	7.20275
				1027.05	7.25946	7.19353
				1028.05	7.25043	7.18431
				1029.05	7.24139	7.1751
				1030.05	7.23212	7.16589
				1031.05	7.22263	7.15669
				1032.05	7.21315	7.1475
				1033.05	7.20344	7.13831
				1034.05	7.19361	7.12913
				1035.05	7.18377	7.11995
				1036.05	7.17484	7.11078
				1037.05	7.16622	7.10161
				1038.05	7.15759	7.09245
				1039.05	7.14885	7.0833
				1040.05	7.14009	7.07416
				1041.05	7.13133	7.06502
				1042.05	7.12173	7.05588
				1043.05	7.11209	7.04675
				1044.05	7.10246	7.03763
				1045.05	7.0931	7.02852
				1046.05	7.08374	7.01941
				1047.05	7.07449	7.01031
				1048.05	7.06579	7.00121
				1049.05	7.05709	6.99212
				1050.05	7.04841	6.98304
				1051.05	7.03978	6.97396
				1052.05	7.03114	6.96489
				1053.05	7.02219	6.95583
				1054.05	7.01263	6.94677
				1055.05	7.00307	6.93772
				1056.05	6.99393	6.92867
				1057.05	6.98531	6.91964
				1058.05	6.97668	6.91061
				1059.05	6.968	6.90158
				1060.05	6.95928	6.89257
				1061.05	6.95055	6.88356
				1062.05	6.94171	6.87455
				1063.05	6.9328	6.86555
				1064.05	6.92389	6.85656
				1065.05	6.91468	6.84758
				1066.05	6.90538	6.83861
				1067.05	6.89607	6.82964
				1068.05	6.8874	6.82067
				1069.05	6.87885	6.81172
				1070.05	6.87029	6.80277
				1071.05	6.86151	6.79383
				1072.05	6.85272	6.78489
				1073.05	6.8439	6.77597
				1074.05	6.83461	6.76705
				1075.05	6.82533	6.75813
				1076.05	6.81609	6.74923
				1077.05	6.80716	6.74033
				1078.05	6.79822	6.73144
				1079.05	6.7894	6.72255
				1080.05	6.78092	6.71368
				1081.05	6.77245	6.70481
				1082.05	6.76388	6.69594
				1083.05	6.75516	6.68709
				1084.05	6.74643	6.67824
				1085.05	6.73745	6.6694
				1086.05	6.72818	6.66056
				1087.05	6.71891	6.65174
				1088.05	6.71011	6.64292
				1089.05	6.7017	6.63411
				1090.05	6.6933	6.6253
				1091.05	6.68475	6.61651
				1092.05	6.67612	6.60772
				1093.05	6.66749	6.59894
				1094.05	6.65872	6.59016
				1095.05	6.64989	6.5814
				1096.05	6.64106	6.57264
				1097.05	6.63189	6.56388
				1098.05	6.62266	6.55514
				1099.05	6.61342	6.5464
				1100.05	6.60493	6.53768
				1101.05	6.59647	6.52895
				1102.05	6.58801	6.52024
				1103.05	6.57957	6.51154
				1104.05	6.57113	6.50284
				1105.05	6.56256	6.49415
				1106.05	6.55332	6.48546
				1107.05	6.54407	6.47679
				1108.05	6.53491	6.46812
				1109.05	6.52603	6.45946
				1110.05	6.51715	6.45081
				1111.05	6.50851	6.44217
				1112.05	6.5003	6.43353
				1113.05	6.49209	6.4249
				1114.05	6.48372	6.41628
				1115.05	6.47514	6.40767
				1116.05	6.46657	6.39907
				1117.05	6.45761	6.39047
				1118.05	6.44833	6.38188
				1119.05	6.43906	6.3733
				1120.05	6.43044	6.36473
				1121.05	6.42218	6.35616
				1122.05	6.41392	6.34761
				1123.05	6.40561	6.33906
				1124.05	6.39729	6.33052
				1125.05	6.38896	6.32198
				1126.05	6.38029	6.31346
				1127.05	6.37155	6.30494
				1128.05	6.36282	6.29643
				1129.05	6.35371	6.28793
				1130.05	6.34457	6.27944
				1131.05	6.33549	6.27096
				1132.05	6.32736	6.26248
				1133.05	6.31923	6.25401
				1134.05	6.3111	6.24555
				1135.05	6.30291	6.2371
				1136.05	6.29472	6.22866
				1137.05	6.28638	6.22022
				1138.05	6.27761	6.21179
				1139.05	6.26884	6.20337
				1140.05	6.26019	6.19496
				1141.05	6.25177	6.18656
				1142.05	6.24334	6.17817
				1143.05	6.2351	6.16978
				1144.05	6.2271	6.1614
				1145.05	6.2191	6.15303
				1146.05	6.21094	6.14467
				1147.05	6.20264	6.13632
				1148.05	6.19434	6.12797
				1149.05	6.18572	6.11964
				1150.05	6.17692	6.11131
				1151.05	6.16812	6.10299
				1152.05	6.16002	6.09468
				1153.05	6.15214	6.08638
				1154.05	6.14427	6.07808
				1155.05	6.13624	6.06979
				1156.05	6.12818	6.06152
				1157.05	6.12013	6.05325
				1158.05	6.11148	6.04499
				1159.05	6.10281	6.03673
				1160.05	6.09412	6.02849
				1161.05	6.08516	6.02025
				1162.05	6.07621	6.01203
				1163.05	6.06744	6.00381
				1164.05	6.05979	5.9956
				1165.05	6.05213	5.9874
				1166.05	6.0444	5.9792
				1167.05	6.03643	5.97102
				1168.05	6.02846	5.96284
				1169.05	6.02022	5.95467
				1170.05	6.01147	5.94651
				1171.05	6.00272	5.93836
				1172.05	5.99422	5.93022
				1173.05	5.98602	5.92209
				1174.05	5.97782	5.91396
				1175.05	5.96979	5.90585
				1176.05	5.9619	5.89774
				1177.05	5.95401	5.88964
				1178.05	5.94605	5.88155
				1179.05	5.93805	5.87347
				1180.05	5.93004	5.86539
				1181.05	5.9213	5.85733
				1182.05	5.91232	5.84927
				1183.05	5.90333	5.84122
				1184.05	5.8955	5.83318
				1185.05	5.88787	5.82515
				1186.05	5.88023	5.81713
				1187.05	5.8724	5.80912
				1188.05	5.86456	5.80111
				1189.05	5.85669	5.79312
				1190.05	5.84834	5.78513
				1191.05	5.83999	5.77715
				1192.05	5.83163	5.76918
				1193.05	5.82323	5.76122
				1194.05	5.81483	5.75327
				1195.05	5.80659	5.74532
				1196.05	5.79883	5.73739
				1197.05	5.79106	5.72946
				1198.05	5.78329	5.72154
				1199.05	5.77549	5.71363
				1200.05	5.76769	5.70573
				1201.05	5.75969	5.69784
				1202.05	5.75143	5.68996
				1203.05	5.74318	5.68209
				1204.05	5.73513	5.67422
				1205.05	5.72726	5.66636
				1206.05	5.71938	5.65852
				1207.05	5.71167	5.65068
				1208.05	5.70405	5.64285
				1209.05	5.69643	5.63502
				1210.05	5.68876	5.62721
				1211.05	5.68106	5.61941
				1212.05	5.67336	5.61161
				1213.05	5.66483	5.60382
				1214.05	5.65615	5.59605
				1215.05	5.64747	5.58828
				1216.05	5.64005	5.58052
				1217.05	5.6327	5.57277
				1218.05	5.62534	5.56502
				1219.05	5.61796	5.55729
				1220.05	5.61058	5.54956
				1221.05	5.60312	5.54185
				1222.05	5.59513	5.53414
				1223.05	5.58714	5.52644
				1224.05	5.5791	5.51875
				1225.05	5.57087	5.51107
				1226.05	5.56264	5.5034
				1227.05	5.55481	5.49573
				1228.05	5.5477	5.48808
				1229.05	5.54059	5.48043
				1230.05	5.53333	5.4728
				1231.05	5.52587	5.46517
				1232.05	5.51841	5.45755
				1233.05	5.51049	5.44994
				1234.05	5.50217	5.44234
				1235.05	5.49385	5.43474
				1236.05	5.48605	5.42716
				1237.05	5.47853	5.41959
				1238.05	5.471	5.41202
				1239.05	5.46361	5.40446
				1240.05	5.45627	5.39691
				1241.05	5.44892	5.38937
				1242.05	5.44142	5.38184
				1243.05	5.43389	5.37432
				1244.05	5.42636	5.36681
				1245.05	5.41834	5.3593
				1246.05	5.4103	5.35181
				1247.05	5.4023	5.34432
				1248.05	5.3951	5.33684
				1249.05	5.3879	5.32937
				1250.05	5.38067	5.32191
				1251.05	5.37323	5.31446
				1252.05	5.36579	5.30702
				1253.05	5.35829	5.29958
				1254.05	5.3506	5.29216
				1255.05	5.34291	5.28474
				1256.05	5.33514	5.27734
				1257.05	5.32722	5.26994
				1258.05	5.31929	5.26255
				1259.05	5.31178	5.25517
				1260.05	5.30478	5.2478
				1261.05	5.29777	5.24043
				1262.05	5.29066	5.23308
				1263.05	5.28345	5.22573
				1264.05	5.27625	5.2184
				1265.05	5.26856	5.21107
				1266.05	5.26062	5.20375
				1267.05	5.25267	5.19644
				1268.05	5.24523	5.18914
				1269.05	5.23795	5.18185
				1270.05	5.23067	5.17457
				1271.05	5.2234	5.16729
				1272.05	5.21612	5.16003
				1273.05	5.20885	5.15277
				1274.05	5.20164	5.14552
				1275.05	5.19444	5.13828
				1276.05	5.18721	5.13105
				1277.05	5.17941	5.12383
				1278.05	5.17161	5.11662
				1279.05	5.16392	5.10942
				1280.05	5.15691	5.10222
				1281.05	5.14989	5.09503
				1282.05	5.14291	5.08786
				1283.05	5.13602	5.08069
				1284.05	5.12913	5.07353
				1285.05	5.12199	5.06638
				1286.05	5.11437	5.05924
				1287.05	5.10674	5.0521
				1288.05	5.09921	5.04498
				1289.05	5.09177	5.03787
				1290.05	5.08434	5.03076
				1291.05	5.07718	5.02366
				1292.05	5.07025	5.01657
				1293.05	5.06332	5.00949
				1294.05	5.05643	5.00242
				1295.05	5.04954	4.99536
				1296.05	5.04266	4.9883
				1297.05	5.03526	4.98126
				1298.05	5.02769	4.97422
				1299.05	5.02011	4.9672
				1300.05	5.01313	4.96018
				1301.05	5.00625	4.95317
				1302.05	4.99937	4.94617
				1303.05	4.99224	4.93918
				1304.05	4.9851	4.93219
				1305.05	4.97797	4.92522
				1306.05	4.97086	4.91825
				1307.05	4.96376	4.9113
				1308.05	4.95661	4.90435
				1309.05	4.94916	4.89741
				1310.05	4.9417	4.89048
				1311.05	4.93448	4.88356
				1312.05	4.92795	4.87664
				1313.05	4.92143	4.86974
				1314.05	4.91475	4.86284
				1315.05	4.90777	4.85596
				1316.05	4.9008	4.84908
				1317.05	4.89371	4.84221
				1318.05	4.88645	4.83535
				1319.05	4.8792	4.8285
				1320.05	4.872	4.82165
				1321.05	4.86485	4.81482
				1322.05	4.8577	4.80799
				1323.05	4.85082	4.80118
				1324.05	4.8441	4.79437
				1325.05	4.83738	4.78757
				1326.05	4.83069	4.78078
				1327.05	4.82401	4.77399
				1328.05	4.81733	4.76722
				1329.05	4.8102	4.76046
				1330.05	4.803	4.7537
				1331.05	4.79579	4.74695
				1332.05	4.78906	4.74022
				1333.05	4.78237	4.73349
				1334.05	4.77567	4.72676
				1335.05	4.76892	4.72005
				1336.05	4.76218	4.71335
				1337.05	4.75543	4.70665
				1338.05	4.74868	4.69997
				1339.05	4.74194	4.69329
				1340.05	4.7351	4.68662
				1341.05	4.72801	4.67996
				1342.05	4.72092	4.67331
				1343.05	4.71399	4.66666
				1344.05	4.70737	4.66003
				1345.05	4.70075	4.6534
				1346.05	4.69422	4.64679
				1347.05	4.6878	4.64018
				1348.05	4.68139	4.63358
				1349.05	4.67473	4.62698
				1350.05	4.66787	4.6204
				1351.05	4.661	4.61383
				1352.05	4.65405	4.60726
				1353.05	4.64705	4.6007
				1354.05	4.64005	4.59416
				1355.05	4.63356	4.58762
				1356.05	4.62723	4.58109
				1357.05	4.6209	4.57456
				1358.05	4.6144	4.56805
				1359.05	4.60787	4.56154
				1360.05	4.60133	4.55505
				1361.05	4.59445	4.54856
				1362.05	4.58754	4.54208
				1363.05	4.58066	4.53561
				1364.05	4.57421	4.52914
				1365.05	4.56775	4.52269
				1366.05	4.56132	4.51624
				1367.05	4.55495	4.50981
				1368.05	4.54859	4.50338
				1369.05	4.54222	4.49696
				1370.05	4.53583	4.49054
				1371.05	4.52944	4.48414
				1372.05	4.52281	4.47775
				1373.05	4.51576	4.47136
				1374.05	4.5087	4.46498
				1375.05	4.50204	4.45861
				1376.05	4.49588	4.45225
				1377.05	4.48971	4.4459
				1378.05	4.48348	4.43956
				1379.05	4.4772	4.43322
				1380.05	4.47092	4.42689
				1381.05	4.46442	4.42057
				1382.05	4.4578	4.41426
				1383.05	4.45117	4.40796
				1384.05	4.44449	4.40167
				1385.05	4.43779	4.39539
				1386.05	4.4311	4.38911
				1387.05	4.42475	4.38284
				1388.05	4.41847	4.37658
				1389.05	4.41219	4.37033
				1390.05	4.40599	4.36409
				1391.05	4.39981	4.35785
				1392.05	4.3936	4.35163
				1393.05	4.38691	4.34541
				1394.05	4.38021	4.3392
				1395.05	4.37361	4.333
				1396.05	4.36747	4.32681
				1397.05	4.36133	4.32062
				1398.05	4.35515	4.31445
				1399.05	4.34882	4.30828
				1400.05	4.34249	4.30212
				1401.05	4.33619	4.29597
				1402.05	4.32995	4.28983
				1403.05	4.3237	4.28369
				1404.05	4.31723	4.27756
				1405.05	4.31047	4.27145
				1406.05	4.30371	4.26534
				1407.05	4.29736	4.25924
				1408.05	4.29135	4.25314
				1409.05	4.28534	4.24706
				1410.05	4.27931	4.24098
				1411.05	4.27327	4.23491
				1412.05	4.26723	4.22885
				1413.05	4.26088	4.2228
				1414.05	4.25442	4.21676
				1415.05	4.24797	4.21072
				1416.05	4.24157	4.2047
				1417.05	4.23519	4.19868
				1418.05	4.2288	4.19267
				1419.05	4.22276	4.18667
				1420.05	4.21674	4.18067
				1421.05	4.21073	4.17469
				1422.05	4.20487	4.16871
				1423.05	4.19901	4.16274
				1424.05	4.19306	4.15678
				1425.05	4.18663	4.15082
				1426.05	4.1802	4.14488
				1427.05	4.17387	4.13894
				1428.05	4.16783	4.13301
				1429.05	4.16179	4.12709
				1430.05	4.15575	4.12118
				1431.05	4.1497	4.11528
				1432.05	4.14365	4.10938
				1433.05	4.13761	4.10349
				1434.05	4.13159	4.09761
				1435.05	4.12556	4.09174
				1436.05	4.11949	4.08588
				1437.05	4.11338	4.08002
				1438.05	4.10727	4.07417
				1439.05	4.1014	4.06833
				1440.05	4.09564	4.0625
				1441.05	4.08989	4.05668
				1442.05	4.08413	4.05086
				1443.05	4.07836	4.04505
				1444.05	4.07259	4.03926
				1445.05	4.06638	4.03346
				1446.05	4.06008	4.02768
				1447.05	4.05379	4.0219
				1448.05	4.04785	4.01614
				1449.05	4.04193	4.01038
				1450.05	4.03603	4.00463
				1451.05	4.03034	3.99888
				1452.05	4.02464	3.99315
				1453.05	4.01895	3.98742
				1454.05	4.01327	3.9817
				1455.05	4.00759	3.97599
				1456.05	4.00182	3.97028
				1457.05	3.99578	3.96459
				1458.05	3.98974	3.9589
				1459.05	3.98382	3.95322
				1460.05	3.97813	3.94755
				1461.05	3.97244	3.94188
				1462.05	3.9668	3.93623
				1463.05	3.9612	3.93058
				1464.05	3.9556	3.92494
				1465.05	3.9499	3.91931
				1466.05	3.94412	3.91368
				1467.05	3.93834	3.90807
				1468.05	3.93231	3.90246
				1469.05	3.92614	3.89685
				1470.05	3.91997	3.89126
				1471.05	3.91439	3.88568
				1472.05	3.909	3.8801
				1473.05	3.90362	3.87453
				1474.05	3.89801	3.86897
				1475.05	3.89237	3.86341
				1476.05	3.88673	3.85786
				1477.05	3.88086	3.85233
				1478.05	3.87497	3.84679
				1479.05	3.8691	3.84127
				1480.05	3.86357	3.83576
				1481.05	3.85804	3.83025
				1482.05	3.85254	3.82475
				1483.05	3.84718	3.81926
				1484.05	3.84182	3.81377
				1485.05	3.83639	3.80829
				1486.05	3.83073	3.80283
				1487.05	3.82508	3.79736
				1488.05	3.8193	3.79191
				1489.05	3.81329	3.78646
				1490.05	3.80729	3.78103
				1491.05	3.80157	3.77559
				1492.05	3.79621	3.77017
				1493.05	3.79085	3.76476
				1494.05	3.78541	3.75935
				1495.05	3.77991	3.75395
				1496.05	3.77442	3.74856
				1497.05	3.76875	3.74317
				1498.05	3.763	3.73779
				1499.05	3.75725	3.73242
				1500.05	3.75149	3.72706
				1501.05	3.74572	3.72171
				1502.05	3.73995	3.71636
				1503.05	3.73467	3.71102
				1504.05	3.72948	3.70569
				1505.05	3.72428	3.70036
				1506.05	3.71898	3.69505
				1507.05	3.71368	3.68974
				1508.05	3.70836	3.68444
				1509.05	3.70266	3.67914
				1510.05	3.69696	3.67386
				1511.05	3.69134	3.66858
				1512.05	3.68609	3.66331
				1513.05	3.68085	3.65804
				1514.05	3.67557	3.65278
				1515.05	3.6702	3.64754
				1516.05	3.66482	3.64229
				1517.05	3.65953	3.63706
				1518.05	3.65439	3.63183
				1519.05	3.64924	3.62661
				1520.05	3.64387	3.6214
				1521.05	3.6382	3.6162
				1522.05	3.63254	3.611
				1523.05	3.62729	3.60581
				1524.05	3.62239	3.60063
				1525.05	3.61748	3.59545
				1526.05	3.61225	3.59029
				1527.05	3.60683	3.58513
				1528.05	3.60141	3.57997
				1529.05	3.59592	3.57483
				1530.05	3.5904	3.56969
				1531.05	3.58488	3.56456
				1532.05	3.57945	3.55944
				1533.05	3.57404	3.55432
				1534.05	3.56863	3.54921
				1535.05	3.56356	3.54411
				1536.05	3.5585	3.53902
				1537.05	3.55344	3.53393
				1538.05	3.54825	3.52885
				1539.05	3.54305	3.52378
				1540.05	3.53778	3.51871
				1541.05	3.53209	3.51365
				1542.05	3.5264	3.5086
				1543.05	3.52086	3.50356
				1544.05	3.51577	3.49852
				1545.05	3.51067	3.4935
				1546.05	3.5056	3.48847
				1547.05	3.50055	3.48346
				1548.05	3.49551	3.47845
				1549.05	3.49042	3.47345
				1550.05	3.48528	3.46846
				1551.05	3.48013	3.46347
				1552.05	3.47482	3.4585
				1553.05	3.46936	3.45352
				1554.05	3.4639	3.44856
				1555.05	3.45887	3.4436
				1556.05	3.45409	3.43865
				1557.05	3.4493	3.43371
				1558.05	3.44443	3.42878
				1559.05	3.43954	3.42385
				1560.05	3.43465	3.41893
				1561.05	3.4295	3.41401
				1562.05	3.42429	3.4091
				1563.05	3.41908	3.4042
				1564.05	3.414	3.39931
				1565.05	3.40893	3.39443
				1566.05	3.40386	3.38955
				1567.05	3.39909	3.38467
				1568.05	3.39431	3.37981
				1569.05	3.38952	3.37495
				1570.05	3.3846	3.3701
				1571.05	3.37968	3.36526
				1572.05	3.37471	3.36042
				1573.05	3.36957	3.35559
				1574.05	3.36443	3.35077
				1575.05	3.35944	3.34595
				1576.05	3.3547	3.34114
				1577.05	3.34997	3.33634
				1578.05	3.34512	3.33155
				1579.05	3.34015	3.32676
				1580.05	3.33518	3.32198
				1581.05	3.33025	3.3172
				1582.05	3.32535	3.31244
				1583.05	3.32044	3.30768
				1584.05	3.31539	3.30292
				1585.05	3.31027	3.29818
				1586.05	3.30514	3.29344
				1587.05	3.30034	3.2887
				1588.05	3.29565	3.28398
				1589.05	3.29095	3.27926
				1590.05	3.28627	3.27455
				1591.05	3.28158	3.26984
				1592.05	3.27689	3.26514
				1593.05	3.27184	3.26045
				1594.05	3.26678	3.25577
				1595.05	3.26172	3.25109
				1596.05	3.25681	3.24642
				1597.05	3.25189	3.24175
				1598.05	3.24702	3.23709
				1599.05	3.24235	3.23244
				1600.05	3.23768	3.2278
				1601.05	3.23301	3.22316
				1602.05	3.22835	3.21853
				1603.05	3.22368	3.21391
				1604.05	3.21881	3.20929
				1605.05	3.21356	3.20468
				1606.05	3.20831	3.20008
				1607.05	3.2034	3.19548
				1608.05	3.19892	3.19089
				1609.05	3.19443	3.1863
				1610.05	3.18977	3.18173
				1611.05	3.18497	3.17716
				1612.05	3.18017	3.17259
				1613.05	3.1754	3.16804
				1614.05	3.17064	3.16349
				1615.05	3.16589	3.15894
				1616.05	3.16105	3.15441
				1617.05	3.1562	3.14987
				1618.05	3.15134	3.14535
				1619.05	3.14692	3.14083
				1620.05	3.14257	3.13632
				1621.05	3.13823	3.13182
				1622.05	3.13369	3.12732
				1623.05	3.12914	3.12283
				1624.05	3.12457	3.11835
				1625.05	3.11959	3.11387
				1626.05	3.11461	3.1094
				1627.05	3.10968	3.10493
				1628.05	3.10504	3.10047
				1629.05	3.1004	3.09602
				1630.05	3.09578	3.09158
				1631.05	3.09124	3.08714
				1632.05	3.08671	3.08271
				1633.05	3.08221	3.07828
				1634.05	3.07777	3.07386
				1635.05	3.07333	3.06945
				1636.05	3.06884	3.06504
				1637.05	3.06427	3.06064
				1638.05	3.05971	3.05625
				1639.05	3.05538	3.05186
				1640.05	3.05124	3.04748
				1641.05	3.0471	3.04311
				1642.05	3.0428	3.03874
				1643.05	3.03842	3.03438
				1644.05	3.03404	3.03003
				1645.05	3.02957	3.02568
				1646.05	3.02508	3.02134
				1647.05	3.02058	3.017
				1648.05	3.01586	3.01267
				1649.05	3.01111	3.00835
				1650.05	3.00635	3.00403
				1651.05	3.00205	2.99972
				1652.05	2.99778	2.99542
				1653.05	2.99351	2.99112
				1654.05	2.98943	2.98683
				1655.05	2.98534	2.98254
				1656.05	2.98116	2.97826
				1657.05	2.97644	2.97399
				1658.05	2.97172	2.96973
				1659.05	2.96706	2.96547
				1660.05	2.96263	2.96121
				1661.05	2.95819	2.95697
				1662.05	2.95379	2.95272
				1663.05	2.94946	2.94849
				1664.05	2.94512	2.94426
				1665.05	2.94077	2.94004
				1666.05	2.93639	2.93582
				1667.05	2.93201	2.93161
				1668.05	2.92748	2.92741
				1669.05	2.92282	2.92321
				1670.05	2.91815	2.91902
				1671.05	2.91401	2.91483
				1672.05	2.91015	2.91066
				1673.05	2.90628	2.90648
				1674.05	2.90228	2.90232
				1675.05	2.89824	2.89816
				1676.05	2.89419	2.894
				1677.05	2.88996	2.88985
				1678.05	2.8857	2.88571
				1679.05	2.88143	2.88157
				1680.05	2.87697	2.87744
				1681.05	2.8725	2.87332
				1682.05	2.86804	2.8692
				1683.05	2.8639	2.86509
				1684.05	2.85976	2.86099
				1685.05	2.85562	2.85689
				1686.05	2.85145	2.85279
				1687.05	2.84728	2.8487
				1688.05	2.84303	2.84462
				1689.05	2.83856	2.84055
				1690.05	2.83409	2.83648
				1691.05	2.82975	2.83241
				1692.05	2.82567	2.82836
				1693.05	2.82159	2.82431
				1694.05	2.81761	2.82026
				1695.05	2.81375	2.81622
				1696.05	2.8099	2.81219
				1697.05	2.8058	2.80816
				1698.05	2.8015	2.80414
				1699.05	2.7972	2.80012
				1700.05	2.79265	2.79611
				1701.05	2.78798	2.79211
				1702.05	2.7833	2.78811
				1703.05	2.77919	2.78412
				1704.05	2.77528	2.78013
				1705.05	2.77136	2.77615
				1706.05	2.76745	2.77218
				1707.05	2.76354	2.76821
				1708.05	2.75963	2.76425
				1709.05	2.7554	2.76029
				1710.05	2.75114	2.75634
				1711.05	2.74689	2.75239
				1712.05	2.74266	2.74846
				1713.05	2.73844	2.74452
				1714.05	2.73428	2.74059
				1715.05	2.7305	2.73667
				1716.05	2.72672	2.73276
				1717.05	2.72288	2.72885
				1718.05	2.71885	2.72494
				1719.05	2.71482	2.72104
				1720.05	2.71062	2.71715
				1721.05	2.70611	2.71326
				1722.05	2.70159	2.70938
				1723.05	2.69747	2.70551
				1724.05	2.69382	2.70164
				1725.05	2.69017	2.69777
				1726.05	2.68638	2.69392
				1727.05	2.68248	2.69006
				1728.05	2.67859	2.68622
				1729.05	2.67462	2.68238
				1730.05	2.67061	2.67854
				1731.05	2.6666	2.67471
				1732.05	2.66242	2.67089
				1733.05	2.65818	2.66707
				1734.05	2.65395	2.66326
				1735.05	2.65007	2.65945
				1736.05	2.64624	2.65565
				1737.05	2.64242	2.65185
				1738.05	2.63857	2.64806
				1739.05	2.63472	2.64428
				1740.05	2.63086	2.6405
				1741.05	2.6268	2.63672
				1742.05	2.62275	2.63296
				1743.05	2.61872	2.62919
				1744.05	2.61487	2.62544
				1745.05	2.61101	2.62169
				1746.05	2.60717	2.61794
				1747.05	2.60338	2.6142
				1748.05	2.5996	2.61047
				1749.05	2.59591	2.60674
				1750.05	2.59242	2.60302
				1751.05	2.58892	2.5993
				1752.05	2.58513	2.59559
				1753.05	2.58098	2.59188
				1754.05	2.57682	2.58818
				1755.05	2.57304	2.58448
				1756.05	2.56957	2.58079
				1757.05	2.5661	2.57711
				1758.05	2.56249	2.57343
				1759.05	2.5588	2.56975
				1760.05	2.55511	2.56609
				1761.05	2.55144	2.56242
				1762.05	2.54778	2.55877
				1763.05	2.54411	2.55511
				1764.05	2.54023	2.55147
				1765.05	2.5363	2.54783
				1766.05	2.53238	2.54419
				1767.05	2.52887	2.54056
				1768.05	2.52538	2.53694
				1769.05	2.5219	2.53332
				1770.05	2.51842	2.5297
				1771.05	2.51495	2.52609
				1772.05	2.51139	2.52249
				1773.05	2.50729	2.51889
				1774.05	2.50319	2.5153
				1775.05	2.49917	2.51171
				1776.05	2.49536	2.50813
				1777.05	2.49156	2.50455
				1778.05	2.48783	2.50098
				1779.05	2.48423	2.49742
				1780.05	2.48064	2.49386
				1781.05	2.4771	2.4903
				1782.05	2.47364	2.48675
				1783.05	2.47018	2.48321
				1784.05	2.46644	2.47967
				1785.05	2.46248	2.47613
				1786.05	2.45852	2.4726
				1787.05	2.4549	2.46908
				1788.05	2.45148	2.46556
				1789.05	2.44806	2.46205
				1790.05	2.44458	2.45854
				1791.05	2.44109	2.45504
				1792.05	2.4376	2.45154
				1793.05	2.434	2.44805
				1794.05	2.43037	2.44456
				1795.05	2.42674	2.44108
				1796.05	2.42284	2.4376
				1797.05	2.41893	2.43413
				1798.05	2.41503	2.43066
				1799.05	2.41143	2.4272
				1800.05	2.40782	2.42375
				1801.05	2.40426	2.42029
				1802.05	2.40095	2.41685
				1803.05	2.39763	2.41341
				1804.05	2.39423	2.40997
				1805.05	2.39053	2.40654
				1806.05	2.38684	2.40312
				1807.05	2.38328	2.3997
				1808.05	2.37999	2.39628
				1809.05	2.37669	2.39287
				1810.05	2.37334	2.38947
				1811.05	2.36991	2.38607
				1812.05	2.36648	2.38267
				1813.05	2.36309	2.37928
				1814.05	2.35972	2.3759
				1815.05	2.35635	2.37252
				1816.05	2.35265	2.36914
				1817.05	2.34878	2.36577
				1818.05	2.34491	2.36241
				1819.05	2.34157	2.35905
				1820.05	2.3384	2.35569
				1821.05	2.33524	2.35234
				1822.05	2.33187	2.349
				1823.05	2.32846	2.34566
				1824.05	2.32505	2.34233
				1825.05	2.32152	2.339
				1826.05	2.31797	2.33567
				1827.05	2.31442	2.33235
				1828.05	2.31077	2.32904
				1829.05	2.30711	2.32573
				1830.05	2.30349	2.32242
				1831.05	2.30008	2.31912
				1832.05	2.29668	2.31583
				1833.05	2.29331	2.31254
				1834.05	2.29006	2.30925
				1835.05	2.2868	2.30597
				1836.05	2.28345	2.3027
				1837.05	2.2799	2.29942
				1838.05	2.27636	2.29616
				1839.05	2.273	2.2929
				1840.05	2.26985	2.28964
				1841.05	2.26671	2.28639
				1842.05	2.26339	2.28314
				1843.05	2.25994	2.2799
				1844.05	2.25648	2.27667
				1845.05	2.25315	2.27343
				1846.05	2.24988	2.27021
				1847.05	2.24662	2.26699
				1848.05	2.24318	2.26377
				1849.05	2.23967	2.26056
				1850.05	2.23617	2.25735
				1851.05	2.23315	2.25415
				1852.05	2.23021	2.25095
				1853.05	2.22727	2.24775
				1854.05	2.22393	2.24456
				1855.05	2.22057	2.24138
				1856.05	2.2172	2.2382
				1857.05	2.21384	2.23503
				1858.05	2.21048	2.23186
				1859.05	2.20714	2.22869
				1860.05	2.20389	2.22553
				1861.05	2.20065	2.22238
				1862.05	2.19743	2.21923
				1863.05	2.19426	2.21608
				1864.05	2.1911	2.21294
				1865.05	2.18794	2.2098
				1866.05	2.18481	2.20667
				1867.05	2.18168	2.20354
				1868.05	2.17843	2.20042
				1869.05	2.17502	2.1973
				1870.05	2.1716	2.19419
				1871.05	2.16846	2.19108
				1872.05	2.16554	2.18798
				1873.05	2.16261	2.18488
				1874.05	2.15943	2.18178
				1875.05	2.15612	2.17869
				1876.05	2.15281	2.17561
				1877.05	2.14965	2.17252
				1878.05	2.14654	2.16945
				1879.05	2.14343	2.16638
				1880.05	2.14006	2.16331
				1881.05	2.13664	2.16025
				1882.05	2.13323	2.15719
				1883.05	2.1302	2.15413
				1884.05	2.12719	2.15109
				1885.05	2.12418	2.14804
				1886.05	2.12111	2.145
				1887.05	2.11804	2.14197
				1888.05	2.11491	2.13893
				1889.05	2.11146	2.13591
				1890.05	2.10802	2.13289
				1891.05	2.10468	2.12987
				1892.05	2.10167	2.12686
				1893.05	2.09866	2.12385
				1894.05	2.09561	2.12084
				1895.05	2.09249	2.11784
				1896.05	2.08937	2.11485
				1897.05	2.08635	2.11186
				1898.05	2.08345	2.10887
				1899.05	2.08055	2.10589
				1900.05	2.07735	2.10292
				1901.05	2.0739	2.09994
				1902.05	2.07046	2.09697
				1903.05	2.0676	2.09401
				1904.05	2.06507	2.09105
				1905.05	2.06253	2.0881
				1906.05	2.0597	2.08515
				1907.05	2.05677	2.0822
				1908.05	2.05384	2.07926
				1909.05	2.05082	2.07632
				1910.05	2.04778	2.07339
				1911.05	2.04475	2.07046
				1912.05	2.04145	2.06754
				1913.05	2.03814	2.06462
				1914.05	2.03485	2.0617
				1915.05	2.03199	2.05879
				1916.05	2.02913	2.05588
				1917.05	2.02626	2.05298
				1918.05	2.02333	2.05008
				1919.05	2.02039	2.04719
				1920.05	2.0174	2.0443
				1921.05	2.01422	2.04141
				1922.05	2.01104	2.03853
				1923.05	2.00796	2.03566
				1924.05	2.00508	2.03278
				1925.05	2.00219	2.02992
				1926.05	1.99925	2.02705
				1927.05	1.99624	2.02419
				1928.05	1.99323	2.02134
				1929.05	1.99044	2.01849
				1930.05	1.98783	2.01564
				1931.05	1.98522	2.0128
				1932.05	1.98223	2.00996
				1933.05	1.97904	2.00712
				1934.05	1.97584	2.00429
				1935.05	1.97305	2.00147
				1936.05	1.97038	1.99865
				1937.05	1.96771	1.99583
				1938.05	1.96484	1.99302
				1939.05	1.96193	1.99021
				1940.05	1.95902	1.9874
				1941.05	1.95607	1.9846
				1942.05	1.95311	1.98181
				1943.05	1.95015	1.97902
				1944.05	1.94712	1.97623
				1945.05	1.9441	1.97344
				1946.05	1.94113	1.97067
				1947.05	1.93849	1.96789
				1948.05	1.93585	1.96512
				1949.05	1.93316	1.96235
				1950.05	1.93032	1.95959
				1951.05	1.92748	1.95683
				1952.05	1.92459	1.95407
				1953.05	1.92161	1.95132
				1954.05	1.91862	1.94858
				1955.05	1.91586	1.94583
				1956.05	1.91337	1.9431
				1957.05	1.91088	1.94036
				1958.05	1.90817	1.93763
				1959.05	1.90527	1.93491
				1960.05	1.90237	1.93218
				1961.05	1.89956	1.92947
				1962.05	1.89679	1.92675
				1963.05	1.89402	1.92404
				1964.05	1.89094	1.92134
				1965.05	1.88775	1.91863
				1966.05	1.88456	1.91594
				1967.05	1.88193	1.91324
				1968.05	1.87939	1.91055
				1969.05	1.87686	1.90787
				1970.05	1.87407	1.90518
				1971.05	1.87127	1.90251
				1972.05	1.86846	1.89983
				1973.05	1.86554	1.89716
				1974.05	1.86262	1.8945
				1975.05	1.85974	1.89184
				1976.05	1.85706	1.88918
				1977.05	1.85438	1.88652
				1978.05	1.85176	1.88387
				1979.05	1.84928	1.88123
				1980.05	1.84681	1.87858
				1981.05	1.84432	1.87595
				1982.05	1.84178	1.87331
				1983.05	1.83924	1.87068
				1984.05	1.83659	1.86806
				1985.05	1.83381	1.86543
				1986.05	1.83103	1.86281
				1987.05	1.82843	1.8602
				1988.05	1.82598	1.85759
				1989.05	1.82354	1.85498
				1990.05	1.82091	1.85238
				1991.05	1.81819	1.84978
				1992.05	1.81546	1.84718
				1993.05	1.81271	1.84459
				1994.05	1.80994	1.842
				1995.05	1.80718	1.83942
				1996.05	1.80436	1.83684
				1997.05	1.80154	1.83426
				1998.05	1.79871	1.83169
				1999.05	1.79632	1.82912
				2000.05	1.79395	1.82656
				2001.05	1.79156	1.824
				2002.05	1.78878	1.82144
				2003.05	1.78599	1.81889
				2004.05	1.78319	1.81634
				2005.05	1.78033	1.81379
				2006.05	1.77746	1.81125
				2007.05	1.77465	1.80871
				2008.05	1.77198	1.80618
				2009.05	1.76931	1.80365
				2010.05	1.76673	1.80112
				2011.05	1.76434	1.7986
				2012.05	1.76195	1.79608
				2013.05	1.75954	1.79356
				2014.05	1.75711	1.79105
				2015.05	1.75467	1.78854
				2016.05	1.75199	1.78604
				2017.05	1.74909	1.78354
				2018.05	1.74619	1.78104
				2019.05	1.74379	1.77855
				2020.05	1.74165	1.77606
				2021.05	1.73951	1.77357
				2022.05	1.73699	1.77109
				2023.05	1.73433	1.76861
				2024.05	1.73168	1.76614
				2025.05	1.72914	1.76367
				2026.05	1.72662	1.7612
				2027.05	1.7241	1.75874
				2028.05	1.7214	1.75628
				2029.05	1.71868	1.75382
				2030.05	1.71599	1.75137
				2031.05	1.71364	1.74892
				2032.05	1.71129	1.74647
				2033.05	1.70892	1.74403
				2034.05	1.70641	1.74159
				2035.05	1.70391	1.73916
				2036.05	1.70134	1.73673
				2037.05	1.69858	1.7343
				2038.05	1.69583	1.73188
				2039.05	1.69327	1.72946
				2040.05	1.69108	1.72704
				2041.05	1.68888	1.72463
				2042.05	1.68662	1.72222
				2043.05	1.68427	1.71981
				2044.05	1.68193	1.71741
				2045.05	1.67958	1.71501
				2046.05	1.67724	1.71262
				2047.05	1.67489	1.71023
				2048.05	1.67229	1.70784
				2049.05	1.66954	1.70545
				2050.05	1.66679	1.70307
				2051.05	1.66432	1.7007
				2052.05	1.66193	1.69832
				2053.05	1.65955	1.69595
				2054.05	1.65725	1.69358
				2055.05	1.65496	1.69122
				2056.05	1.65267	1.68886
				2057.05	1.65021	1.68651
				2058.05	1.64773	1.68415
				2059.05	1.64524	1.6818
				2060.05	1.64258	1.67946
				2061.05	1.63991	1.67712
				2062.05	1.63732	1.67478
				2063.05	1.63514	1.67244
				2064.05	1.63295	1.67011
				2065.05	1.63071	1.66778
				2066.05	1.62832	1.66546
				2067.05	1.62592	1.66313
				2068.05	1.62351	1.66082
				2069.05	1.62107	1.6585
				2070.05	1.61863	1.65619
				2071.05	1.61634	1.65388
				2072.05	1.61421	1.65158
				2073.05	1.61208	1.64928
				2074.05	1.60985	1.64698
				2075.05	1.60754	1.64468
				2076.05	1.60522	1.64239
				2077.05	1.60304	1.64011
				2078.05	1.60093	1.63782
				2079.05	1.59882	1.63554
				2080.05	1.59633	1.63326
				2081.05	1.59371	1.63099
				2082.05	1.59109	1.62872
				2083.05	1.58887	1.62645
				2084.05	1.58673	1.62419
				2085.05	1.58459	1.62193
				2086.05	1.5823	1.61967
				2087.05	1.58001	1.61742
				2088.05	1.57771	1.61517
				2089.05	1.5753	1.61292
				2090.05	1.57289	1.61068
				2091.05	1.57049	1.60844
				2092.05	1.56815	1.6062
				2093.05	1.56581	1.60397
				2094.05	1.56352	1.60174
				2095.05	1.56139	1.59951
				2096.05	1.55926	1.59728
				2097.05	1.55713	1.59506
				2098.05	1.555	1.59285
				2099.05	1.55287	1.59063
				2100.05	1.55062	1.58842
				2101.05	1.54823	1.58621
				2102.05	1.54584	1.58401
				2103.05	1.54366	1.58181
				2104.05	1.54163	1.57961
				2105.05	1.53961	1.57742
				2106.05	1.53729	1.57523
				2107.05	1.53482	1.57304
				2108.05	1.53235	1.57085
				2109.05	1.53003	1.56867
				2110.05	1.52777	1.56649
				2111.05	1.5255	1.56432
				2112.05	1.52304	1.56215
				2113.05	1.52054	1.55998
				2114.05	1.51805	1.55781
				2115.05	1.51601	1.55565
				2116.05	1.51401	1.55349
				2117.05	1.51199	1.55133
				2118.05	1.50975	1.54918
				2119.05	1.5075	1.54703
				2120.05	1.50528	1.54489
				2121.05	1.50319	1.54274
				2122.05	1.5011	1.5406
				2123.05	1.499	1.53847
				2124.05	1.49691	1.53633
				2125.05	1.49483	1.5342
				2126.05	1.49277	1.53207
				2127.05	1.49078	1.52995
				2128.05	1.48879	1.52783
				2129.05	1.48672	1.52571
				2130.05	1.48455	1.5236
				2131.05	1.48238	1.52148
				2132.05	1.48006	1.51938
				2133.05	1.47762	1.51727
				2134.05	1.47518	1.51517
				2135.05	1.4731	1.51307
				2136.05	1.47122	1.51097
				2137.05	1.46934	1.50888
				2138.05	1.46725	1.50679
				2139.05	1.4651	1.5047
				2140.05	1.46295	1.50262
				2141.05	1.46069	1.50054
				2142.05	1.45842	1.49846
				2143.05	1.45614	1.49639
				2144.05	1.45374	1.49431
				2145.05	1.45133	1.49225
				2146.05	1.44895	1.49018
				2147.05	1.44718	1.48812
				2148.05	1.44541	1.48606
				2149.05	1.44362	1.484
				2150.05	1.44168	1.48195
				2151.05	1.43974	1.4799
				2152.05	1.43773	1.47785
				2153.05	1.43549	1.47581
				2154.05	1.43326	1.47377
				2155.05	1.43109	1.47173
				2156.05	1.42904	1.46969
				2157.05	1.42699	1.46766
[truncated: 1,443 more rows]

## Sheet: CAL 250 mM DABCO 50 mM BuI AcN
Calorimetry results using Seteram C80 Calvet calorimeter.
Data recorded by Katherine Koh and analyzed by Tom Autrey. Data recorded May 2021.
Starting DABCO concentration 0.250 M in acetonitrile. Starting butyl iodide concentration 0.05 M in acetonitrile.
Experiment set temperature 30.0 C.
Data analyzed using Berkeley Madonna numerical differential equation solver.
The fit enthalpy change is -126.0 kJ/mol and the fit kinetic rate is 0.0151 M-1 sec-1.
Below, the total number of points in this data sheet has been reduced by 1/16 from the				All experimental and fit data points are given below.
original to make the number of measured heat flow points on the plot less crowed.
TIME (SEC)	MEAS. HEAT (mW)	FIT HEAT (mW)		TIME (SEC)	MEAS. HEAT (mW)	FIT HEAT (mW)
2	0.197666	0		2	0.197666	0
15.5	0.337308	0.363074		2.1	0.197659	3e-07
31.5	1.83323	1.88053		2.3	0.197643	7.88e-06
47.5	3.86857	3.84088		2.7	0.197612	9.788e-05
63.5	5.87184	5.77096		3.5	0.197145	0.0009217
79.5	7.65461	7.52065		4.5	0.196393	0.00404093
95.5	9.23819	9.05989		5.5	0.195642	0.0105066
111.5	10.5793	10.3953		6.5	0.196042	0.0211714
127.5	11.742	11.5431		7.5	0.196936	0.0366695
143.5	12.6984	12.5211		8.5	0.19783	0.0574532
159.5	13.5236	13.3463		9.5	0.202212	0.0838234
175.5	14.1874	14.0342		10.5	0.207466	0.115956
191.5	14.7472	14.599		11.5	0.212721	0.153926
207.5	15.1769	15.0536		12.5	0.235364	0.197723
223.5	15.532	15.4094		13.5	0.259939	0.247273
239.5	15.7815	15.6769		14.5	0.284515	0.302447
255.5	15.9711	15.8658		15.5	0.337308	0.363074
271.5	16.0779	15.9845		16.5	0.390101	0.428955
287.5	16.1315	16.0408		17.5	0.445059	0.499863
303.5	16.1227	16.0418		18.5	0.519511	0.575559
319.5	16.0809	15.9937		19.5	0.593963	0.65579
335.5	15.986	15.9025		20.5	0.669773	0.740298
351.5	15.8605	15.7733		21.5	0.751017	0.828822
367.5	15.6928	15.6109		22.5	0.832262	0.921102
383.5	15.4047	15.4194		23.5	0.919274	1.01688
399.5	15.0696	15.2028		24.5	1.01974	1.11591
415.5	14.7758	14.9646		25.5	1.12021	1.21794
431.5	14.4889	14.708		26.5	1.22764	1.32274
447.5	14.2082	14.4357		27.5	1.34549	1.43007
463.5	13.9182	14.1504		28.5	1.46334	1.53972
479.5	13.6302	13.8543		29.5	1.58446	1.65148
495.5	13.3286	13.5496		30.5	1.70885	1.76515
511.5	13.0322	13.2381		31.5	1.83323	1.88053
527.5	12.7249	12.9215		32.5	1.95375	1.99745
543.5	12.4194	12.6013		33.5	2.0717	2.11574
559.5	12.1051	12.2789		34.5	2.18965	2.23523
575.5	11.7971	11.9555		35.5	2.31457	2.35578
591.5	11.4803	11.6321		36.5	2.44249	2.47725
607.5	11.1719	11.3097		37.5	2.57041	2.59949
623.5	10.8571	10.9891		38.5	2.70461	2.72238
639.5	10.5533	10.6711		39.5	2.84039	2.84582
655.5	10.2468	10.3563		40.5	2.97617	2.96967
671.5	9.95107	10.0453		41.5	3.10812	3.09386
687.5	9.64993	9.73858		42.5	3.23965	3.21827
703.5	9.3606	9.4366		43.5	3.37118	3.34283
719.5	9.06842	9.13972		44.5	3.4943	3.46744
735.5	8.79037	8.84824		45.5	3.61742	3.59203
751.5	8.50892	8.56243		46.5	3.74098	3.71653
767.5	8.23783	8.28251		47.5	3.86857	3.84088
783.5	7.97003	8.00865		48.5	3.99615	3.96501
799.5	7.71276	7.74098		49.5	4.12475	4.08886
815.5	7.45474	7.47963		50.5	4.25741	4.21239
831.5	7.20889	7.22466		51.5	4.39007	4.33554
847.5	6.96249	6.97612		52.5	4.51942	4.45827
863.5	6.7294	6.73405		53.5	4.64106	4.58054
879.5	6.49606	6.49844		54.5	4.7627	4.70232
895.5	6.27365	6.26927		55.5	4.88344	4.82356
911.5	6.05403	6.04653		56.5	5.00284	4.94423
927.5	5.84546	5.83015		57.5	5.12224	5.06431
943.5	5.63748	5.62009		58.5	5.24391	5.18377
959.5	5.44011	5.41626		59.5	5.36786	5.30258
975.5	5.24544	5.21859		60.5	5.4918	5.42073
991.5	5.05906	5.02698		61.5	5.61764	5.53819
1007.5	4.87643	4.84134		62.5	5.74474	5.65494
1023.5	4.70162	4.66156		63.5	5.87184	5.77096
1039.5	4.52943	4.48753		64.5	5.98938	5.88626
1055.5	4.366	4.31914		65.5	6.10283	6.00079
1071.5	4.20492	4.15627		66.5	6.21627	6.11457
1087.5	4.05303	3.99879		67.5	6.32956	6.22757
1103.5	3.90279	3.84658		68.5	6.44282	6.33979
1119.5	3.76007	3.69952		69.5	6.55607	6.45121
1135.5	3.61972	3.55748		70.5	6.67186	6.56184
1151.5	3.486	3.42032		71.5	6.78793	6.67165
1167.5	3.35557	3.28793		72.5	6.904	6.78066
1183.5	3.23168	3.16017		73.5	7.01756	6.88885
1199.5	3.10891	3.03692		74.5	7.13111	6.99622
1215.5	2.9935	2.91804		75.5	7.2435	7.10276
1231.5	2.88109	2.80342		76.5	7.34546	7.20848
1247.5	2.77193	2.69293		77.5	7.44742	7.31337
1263.5	2.66679	2.58645		78.5	7.54993	7.41743
1279.5	2.56444	2.48384		79.5	7.65461	7.52065
1295.5	2.46682	2.38501		80.5	7.75928	7.62305
1311.5	2.37508	2.28982		81.5	7.86483	7.72461
1327.5	2.28568	2.19816		82.5	7.9724	7.82534
1343.5	2.19979	2.10993		83.5	8.07997	7.92524
1359.5	2.11656	2.025		84.5	8.18406	8.02431
1375.5	2.03721	1.94327		85.5	8.28292	8.12256
1391.5	1.95972	1.86463		86.5	8.38178	8.21997
1407.5	1.88553	1.78899		87.5	8.47742	8.31656
1423.5	1.81416	1.71623		88.5	8.56983	8.41233
1439.5	1.74531	1.64627		89.5	8.66224	8.50728
1455.5	1.67916	1.579		90.5	8.75616	8.60141
1471.5	1.61584	1.51433		91.5	8.85109	8.69472
1487.5	1.55416	1.45217		92.5	8.94601	8.78722
1503.5	1.49598	1.39243		93.5	9.04286	8.87892
1519.5	1.44053	1.33503		94.5	9.14052	8.9698
1535.5	1.38558	1.27988		95.5	9.23819	9.05989
1551.5	1.33356	1.22691		96.5	9.32679	9.14918
1567.5	1.2839	1.17602		97.5	9.41312	9.23767
1583.5	1.2365	1.12715		98.5	9.49945	9.32537
1599.5	1.19015	1.08023		99.5	9.58474	9.41228
1615.5	1.14511	1.03517		100.5	9.66992	9.49841
1631.5	1.10222	0.991918		101.5	9.75511	9.58376
1647.5	1.0641	0.950398		102.5	9.84193	9.66833
1663.5	1.0249	0.910548		103.5	9.92876	9.75214
1679.5	0.988449	0.872305		104.5	10.0156	9.83517
1695.5	0.952658	0.835608		105.5	10.1024	9.91744
1711.5	0.918899	0.800397		106.5	10.1892	9.99896
1727.5	0.887421	0.766617		107.5	10.2739	10.0797
1743.5	0.855786	0.734213		108.5	10.3501	10.1597
1759.5	0.826683	0.703132		109.5	10.4264	10.239
1775.5	0.798167	0.673322		110.5	10.5027	10.3175
1791.5	0.770477	0.644734		111.5	10.5793	10.3953
1807.5	0.744856	0.617322		112.5	10.6559	10.4723
1823.5	0.719056	0.591038		113.5	10.7336	10.5487
1839.5	0.694624	0.565839		114.5	10.8128	10.6243
1855.5	0.671509	0.541682		115.5	10.8921	10.6991
1871.5	0.648988	0.518526		116.5	10.9688	10.7733
1887.5	0.628413	0.496331		117.5	11.0432	10.8467
1903.5	0.608134	0.475059		118.5	11.1175	10.9195
1919.5	0.593485	0.454674		119.5	11.1875	10.9915
1935.5	0.628561	0.435139		120.5	11.2547	11.0629
1951.5	0.658097	0.416422		121.5	11.3219	11.1335
1967.5	0.658641	0.398489		122.5	11.3899	11.2035
1983.5	0.648232	0.381308		123.5	11.4582	11.2728
1999.5	0.630706	0.364849		124.5	11.5265	11.3414
2015.5	0.608718	0.349084		125.5	11.5978	11.4093
2031.5	0.588743	0.333983		126.5	11.6699	11.4765
2047.5	0.569867	0.319519		127.5	11.742	11.5431
2063.5	0.548872	0.305668		128.5	11.8057	11.609
2079.5	0.529776	0.292403		129.5	11.8684	11.6743
2095.5	0.510701	0.279701		130.5	11.9312	11.7389
2111.5	0.491554	0.267539		131.5	11.9913	11.8029
2127.5	0.474108	0.255894		132.5	12.0514	11.8662
2143.5	0.457906	0.244745		133.5	12.1116	11.9288
2159.5	0.441737	0.234072		134.5	12.1728	11.9909
2175.5	0.427834	0.223855		135.5	12.2339	12.0523
2191.5	0.412692	0.214075		136.5	12.2955	12.113
2207.5	0.398549	0.204713		137.5	12.3588	12.1732
2223.5	0.385631	0.195753		138.5	12.4221	12.2327
2239.5	0.372344	0.187178		139.5	12.4825	12.2916
2255.5	0.359053	0.178971		140.5	12.5364	12.3499
2271.5	0.348037	0.171118		141.5	12.5902	12.4076
2287.5	0.337152	0.163602		142.5	12.6442	12.4647
2303.5	0.326835	0.156411		143.5	12.6984	12.5211
2319.5	0.316108	0.149531		144.5	12.7526	12.577
2335.5	0.30671	0.142948		145.5	12.8082	12.6323
2351.5	0.297728	0.13665		146.5	12.8653	12.687
2367.5	0.288502	0.130624		147.5	12.9224	12.7411
2383.5	0.281039	0.12486		148.5	12.9774	12.7947
2399.5	0.273081	0.119346		149.5	13.0309	12.8476
2415.5	0.266064	0.114072		150.5	13.0844	12.9
2431.5	0.25795	0.109028		151.5	13.1334	12.9518
2447.5	0.251712	0.104202		152.5	13.1804	13.0031
2463.5	0.245963	0.0995876		153.5	13.2274	13.0538
2479.5	0.239376	0.0951741		154.5	13.2747	13.1039
2495.5	0.232818	0.0909534		155.5	13.3221	13.1535
				156.5	13.3696	13.2025
				157.5	13.4206	13.251
				158.5	13.4721	13.2989
				159.5	13.5236	13.3463
				160.5	13.5671	13.3932
				161.5	13.6107	13.4395
				162.5	13.6541	13.4853
				163.5	13.6958	13.5306
				164.5	13.7376	13.5753
				165.5	13.7796	13.6196
				166.5	13.8225	13.6633
				167.5	13.8655	13.7065
				168.5	13.9091	13.7492
				169.5	13.9542	13.7914
				170.5	13.9993	13.8331
				171.5	14.041	13.8743
				172.5	14.0776	13.915
				173.5	14.1142	13.9553
				174.5	14.1508	13.995
				175.5	14.1874	14.0342
				176.5	14.224	14.073
				177.5	14.2621	14.1113
				178.5	14.3013	14.1491
				179.5	14.3405	14.1865
				180.5	14.3778	14.2233
				181.5	14.4143	14.2597
				182.5	14.4508	14.2957
				183.5	14.4831	14.3312
				184.5	14.5144	14.3662
				185.5	14.5456	14.4008
				186.5	14.5773	14.435
				187.5	14.609	14.4687
				188.5	14.6407	14.5019
				189.5	14.6764	14.5347
				190.5	14.7121	14.5671
				191.5	14.7472	14.599
				192.5	14.7759	14.6306
				193.5	14.8046	14.6616
				194.5	14.833	14.6923
				195.5	14.8602	14.7225
				196.5	14.8873	14.7524
				197.5	14.9146	14.7818
				198.5	14.9422	14.8108
				199.5	14.9697	14.8393
				200.5	14.9983	14.8675
				201.5	15.0282	14.8953
				202.5	15.0582	14.9226
				203.5	15.0847	14.9496
				204.5	15.1077	14.9762
				205.5	15.1307	15.0024
				206.5	15.1538	15.0282
				207.5	15.1769	15.0536
				208.5	15.2	15.0786
				209.5	15.2249	15.1032
				210.5	15.2506	15.1275
				211.5	15.2762	15.1513
				212.5	15.3001	15.1748
				213.5	15.3235	15.198
				214.5	15.347	15.2207
				215.5	15.3664	15.2431
				216.5	15.3854	15.2652
				217.5	15.4045	15.2868
				218.5	15.4241	15.3081
				219.5	15.4437	15.3291
				220.5	15.4637	15.3497
				221.5	15.4869	15.3699
				222.5	15.5101	15.3898
				223.5	15.532	15.4094
				224.5	15.5491	15.4286
				225.5	15.5661	15.4474
				226.5	15.5827	15.466
				227.5	15.5984	15.4841
				228.5	15.614	15.502
				229.5	15.6299	15.5195
				230.5	15.6462	15.5367
				231.5	15.6624	15.5536
				232.5	15.6799	15.5701
				233.5	15.6985	15.5863
				234.5	15.7172	15.6022
				235.5	15.7321	15.6178
				236.5	15.7444	15.633
				237.5	15.7568	15.648
				238.5	15.7691	15.6626
				239.5	15.7815	15.6769
				240.5	15.7938	15.691
				241.5	15.8078	15.7047
				242.5	15.8223	15.7181
				243.5	15.8368	15.7312
				244.5	15.8502	15.744
				245.5	15.8634	15.7565
				246.5	15.8767	15.7687
				247.5	15.8863	15.7807
				248.5	15.8959	15.7923
				249.5	15.9055	15.8036
				250.5	15.9149	15.8147
				251.5	15.9243	15.8255
				252.5	15.9343	15.836
				253.5	15.9471	15.8462
				254.5	15.9599	15.8561
				255.5	15.9711	15.8658
				256.5	15.9787	15.8752
				257.5	15.9864	15.8843
				258.5	15.9937	15.8931
				259.5	16.0006	15.9017
				260.5	16.0075	15.91
				261.5	16.0145	15.9181
				262.5	16.0217	15.9259
				263.5	16.0289	15.9334
				264.5	16.0376	15.9407
				265.5	16.0472	15.9477
				266.5	16.0568	15.9544
				267.5	16.0625	15.9609
				268.5	16.0665	15.9672
				269.5	16.0706	15.9732
				270.5	16.0743	15.979
				271.5	16.0779	15.9845
				272.5	16.0815	15.9898
				273.5	16.0871	15.9948
				274.5	16.0929	15.9996
				275.5	16.0988	16.0041
				276.5	16.1033	16.0084
				277.5	16.1079	16.0125
				278.5	16.1121	16.0164
				279.5	16.1132	16.02
				280.5	16.1143	16.0234
				281.5	16.1153	16.0265
				282.5	16.1161	16.0295
				283.5	16.1169	16.0322
				284.5	16.1189	16.0347
				285.5	16.1237	16.0369
				286.5	16.1285	16.039
				287.5	16.1315	16.0408
				288.5	16.1319	16.0424
				289.5	16.1323	16.0438
				290.5	16.1322	16.045
				291.5	16.1317	16.046
				292.5	16.1312	16.0467
				293.5	16.1307	16.0473
				294.5	16.1303	16.0476
				295.5	16.1298	16.0478
				296.5	16.1312	16.0477
				297.5	16.1333	16.0475
				298.5	16.1355	16.047
				299.5	16.1336	16.0463
				300.5	16.1308	16.0455
				301.5	16.128	16.0444
				302.5	16.1253	16.0432
				303.5	16.1227	16.0418
				304.5	16.1201	16.0401
				305.5	16.1198	16.0383
				306.5	16.1195	16.0363
				307.5	16.1191	16.0341
				308.5	16.1174	16.0317
				309.5	16.1157	16.0292
				310.5	16.1135	16.0264
				311.5	16.1089	16.0235
				312.5	16.1043	16.0204
				313.5	16.0996	16.0171
				314.5	16.0947	16.0136
				315.5	16.0898	16.01
				316.5	16.0864	16.0062
				317.5	16.0853	16.0022
				318.5	16.0842	15.9981
				319.5	16.0809	15.9937
				320.5	16.0755	15.9893
				321.5	16.0701	15.9846
				322.5	16.0643	15.9798
				323.5	16.0582	15.9748
				324.5	16.0521	15.9696
				325.5	16.0463	15.9643
				326.5	16.0405	15.9588
				327.5	16.0347	15.9532
				328.5	16.0307	15.9474
				329.5	16.0271	15.9415
				330.5	16.0236	15.9353
				331.5	16.0165	15.9291
				332.5	16.0091	15.9227
				333.5	16.0016	15.9161
				334.5	15.9938	15.9094
				335.5	15.986	15.9025
				336.5	15.9784	15.8955
				337.5	15.9727	15.8883
				338.5	15.967	15.881
				339.5	15.9611	15.8736
				340.5	15.9538	15.866
				341.5	15.9466	15.8583
				342.5	15.9387	15.8504
				343.5	15.9293	15.8424
				344.5	15.9198	15.8342
				345.5	15.9101	15.8259
				346.5	15.9002	15.8175
				347.5	15.8903	15.8089
				348.5	15.8821	15.8002
				349.5	15.8756	15.7914
				350.5	15.8691	15.7824
				351.5	15.8605	15.7733
				352.5	15.8503	15.7641
				353.5	15.8402	15.7547
				354.5	15.8298	15.7453
				355.5	15.8192	15.7356
				356.5	15.8087	15.7259
				357.5	15.7983	15.7161
				358.5	15.788	15.7061
				359.5	15.7777	15.696
				360.5	15.7692	15.6857
				361.5	15.761	15.6754
				362.5	15.7527	15.6649
				363.5	15.7409	15.6543
				364.5	15.7291	15.6436
				365.5	15.7173	15.6328
				366.5	15.705	15.6219
				367.5	15.6928	15.6109
				368.5	15.6805	15.5997
				369.5	15.6683	15.5884
				370.5	15.6562	15.577
				371.5	15.6427	15.5655
				372.5	15.6261	15.5539
				373.5	15.6095	15.5422
				374.5	15.5914	15.5304
				375.5	15.5708	15.5185
				376.5	15.5502	15.5065
				377.5	15.5288	15.4943
				378.5	15.5064	15.4821
				379.5	15.4841	15.4698
				380.5	15.4638	15.4573
				381.5	15.4448	15.4448
				382.5	15.4259	15.4321
				383.5	15.4047	15.4194
				384.5	15.3825	15.4066
				385.5	15.3603	15.3936
				386.5	15.3383	15.3806
				387.5	15.3162	15.3675
				388.5	15.2942	15.3542
				389.5	15.2728	15.3409
				390.5	15.2514	15.3275
				391.5	15.2301	15.314
				392.5	15.2116	15.3004
				393.5	15.1931	15.2868
				394.5	15.1743	15.273
				395.5	15.1532	15.2591
				396.5	15.1321	15.2452
				397.5	15.1111	15.2312
				398.5	15.0904	15.217
				399.5	15.0696	15.2028
				400.5	15.0497	15.1885
				401.5	15.0318	15.1742
				402.5	15.0139	15.1597
				403.5	14.9958	15.1452
				404.5	14.9777	15.1306
				405.5	14.9595	15.1159
				406.5	14.9407	15.1011
				407.5	14.9215	15.0862
				408.5	14.9022	15.0713
				409.5	14.8824	15.0563
				410.5	14.8624	15.0412
				411.5	14.8424	15.026
				412.5	14.8252	15.0108
				413.5	14.8094	14.9955
				414.5	14.7935	14.9801
				415.5	14.7758	14.9646
				416.5	14.7576	14.9491
				417.5	14.7393	14.9335
				418.5	14.7208	14.9178
				419.5	14.7022	14.9021
				420.5	14.6836	14.8863
				421.5	14.6654	14.8704
				422.5	14.6473	14.8544
				423.5	14.6295	14.8384
				424.5	14.6138	14.8223
				425.5	14.5982	14.8062
				426.5	14.582	14.79
				427.5	14.5639	14.7737
				428.5	14.5457	14.7574
				429.5	14.5273	14.741
				430.5	14.5081	14.7245
				431.5	14.4889	14.708
				432.5	14.4708	14.6914
				433.5	14.4542	14.6747
				434.5	14.4376	14.658
				435.5	14.4208	14.6413
				436.5	14.4039	14.6244
				437.5	14.387	14.6075
				438.5	14.3693	14.5906
				439.5	14.3511	14.5736
				440.5	14.3329	14.5566
				441.5	14.3138	14.5395
				442.5	14.2943	14.5223
				443.5	14.2748	14.5051
				444.5	14.2581	14.4878
				445.5	14.2422	14.4705
				446.5	14.2262	14.4531
				447.5	14.2082	14.4357
				448.5	14.19	14.4182
				449.5	14.1717	14.4007
				450.5	14.1531	14.3831
				451.5	14.1344	14.3655
				452.5	14.1158	14.3478
				453.5	14.0975	14.3301
				454.5	14.0793	14.3123
				455.5	14.0615	14.2945
				456.5	14.0455	14.2766
				457.5	14.0295	14.2587
				458.5	14.0128	14.2408
				459.5	13.9944	14.2228
				460.5	13.976	14.2047
				461.5	13.9572	14.1867
				462.5	13.9377	14.1685
				463.5	13.9182	14.1504
				464.5	13.8999	14.1321
				465.5	13.8829	14.1139
				466.5	13.8658	14.0956
				467.5	13.8484	14.0773
				468.5	13.8309	14.0589
				469.5	13.8133	14.0405
				470.5	13.7951	14.022
				471.5	13.7765	14.0035
				472.5	13.7579	13.985
				473.5	13.7385	13.9664
				474.5	13.7189	13.9478
				475.5	13.6992	13.9292
				476.5	13.6824	13.9105
				477.5	13.6659	13.8918
				478.5	13.6493	13.8731
				479.5	13.6302	13.8543
				480.5	13.6111	13.8355
				481.5	13.592	13.8166
				482.5	13.573	13.7978
				483.5	13.554	13.7788
				484.5	13.535	13.7599
				485.5	13.5162	13.7409
				486.5	13.4974	13.7219
				487.5	13.4791	13.7029
				488.5	13.4619	13.6838
				489.5	13.4447	13.6647
				490.5	13.4267	13.6456
				491.5	13.4075	13.6265
				492.5	13.3883	13.6073
				493.5	13.3687	13.5881
				494.5	13.3487	13.5688
				495.5	13.3286	13.5496
				496.5	13.3102	13.5303
				497.5	13.2928	13.511
				498.5	13.2755	13.4916
				499.5	13.2572	13.4723
				500.5	13.2385	13.4529
				501.5	13.2198	13.4335
				502.5	13.2009	13.414
				503.5	13.1818	13.3946
				504.5	13.1628	13.3751
				505.5	13.1428	13.3556
				506.5	13.1228	13.3361
				507.5	13.1027	13.3165
				508.5	13.0858	13.2969
				509.5	13.0688	13.2773
				510.5	13.0516	13.2577
				511.5	13.0322	13.2381
				512.5	13.0129	13.2184
				513.5	12.9935	13.1988
				514.5	12.9739	13.1791
				515.5	12.9543	13.1594
				516.5	12.9349	13.1396
				517.5	12.9161	13.1199
				518.5	12.8972	13.1001
				519.5	12.8787	13.0803
				520.5	12.8609	13.0605
				521.5	12.843	13.0407
				522.5	12.8244	13.0209
				523.5	12.8049	13.001
				524.5	12.7854	12.9812
				525.5	12.7655	12.9613
				526.5	12.7452	12.9414
				527.5	12.7249	12.9215
				528.5	12.7062	12.9016
				529.5	12.6883	12.8817
				530.5	12.6703	12.8617
				531.5	12.6512	12.8417
				532.5	12.6318	12.8218
				533.5	12.6124	12.8018
				534.5	12.5927	12.7818
				535.5	12.5731	12.7618
				536.5	12.5534	12.7418
				537.5	12.5331	12.7217
				538.5	12.5128	12.7017
				539.5	12.4928	12.6816
				540.5	12.4751	12.6616
				541.5	12.4574	12.6415
				542.5	12.4393	12.6214
				543.5	12.4194	12.6013
				544.5	12.3995	12.5812
				545.5	12.3796	12.5611
				546.5	12.3598	12.541
				547.5	12.34	12.5209
				548.5	12.3205	12.5008
				549.5	12.3016	12.4806
				550.5	12.2826	12.4605
				551.5	12.2638	12.4403
				552.5	12.2453	12.4202
				553.5	12.2267	12.4
				554.5	12.2072	12.3799
				555.5	12.1871	12.3597
				556.5	12.1669	12.3395
				557.5	12.1464	12.3193
				558.5	12.1258	12.2991
				559.5	12.1051	12.2789
				560.5	12.0865	12.2587
				561.5	12.0683	12.2385
				562.5	12.0502	12.2183
				563.5	12.0309	12.1981
				564.5	12.0115	12.1779
				565.5	11.9921	12.1577
				566.5	11.9725	12.1375
				567.5	11.9529	12.1173
				568.5	11.9332	12.0971
				569.5	11.9129	12.0768
				570.5	11.8927	12.0566
				571.5	11.8728	12.0364
				572.5	11.8545	12.0162
				573.5	11.8363	11.9959
				574.5	11.8174	11.9757
				575.5	11.7971	11.9555
				576.5	11.7769	11.9353
				577.5	11.7566	11.915
				578.5	11.7364	11.8948
				579.5	11.7162	11.8746
				580.5	11.6965	11.8544
				581.5	11.6773	11.8342
				582.5	11.6581	11.8139
				583.5	11.6391	11.7937
				584.5	11.6203	11.7735
				585.5	11.6015	11.7533
				586.5	11.5821	11.7331
				587.5	11.5623	11.7129
				588.5	11.5425	11.6927
				589.5	11.5219	11.6725
				590.5	11.5011	11.6523
				591.5	11.4803	11.6321
				592.5	11.4618	11.6119
				593.5	11.4436	11.5917
				594.5	11.4254	11.5715
				595.5	11.4057	11.5514
				596.5	11.3861	11.5312
				597.5	11.3664	11.511
				598.5	11.3467	11.4909
				599.5	11.327	11.4707
				600.5	11.3071	11.4505
				601.5	11.2868	11.4304
				602.5	11.2665	11.4103
				603.5	11.2468	11.3901
				604.5	11.2287	11.37
				605.5	11.2105	11.3499
				606.5	11.1917	11.3298
				607.5	11.1719	11.3097
				608.5	11.1521	11.2896
				609.5	11.132	11.2695
				610.5	11.1117	11.2494
				611.5	11.0913	11.2293
				612.5	11.0717	11.2092
				613.5	11.0527	11.1892
				614.5	11.0336	11.1691
				615.5	11.0147	11.1491
				616.5	10.9959	11.1291
				617.5	10.977	11.109
				618.5	10.9576	11.089
				619.5	10.9381	11.069
				620.5	10.9186	11.049
				621.5	10.8982	11.029
				622.5	10.8776	11.009
				623.5	10.8571	10.9891
				624.5	10.839	10.9691
				625.5	10.821	10.9492
				626.5	10.8028	10.9292
				627.5	10.7833	10.9093
				628.5	10.7639	10.8894
				629.5	10.7444	10.8695
				630.5	10.7251	10.8496
				631.5	10.7057	10.8297
				632.5	10.6861	10.8098
				633.5	10.666	10.79
				634.5	10.6459	10.7701
				635.5	10.6267	10.7503
				636.5	10.6089	10.7305
				637.5	10.5911	10.7106
				638.5	10.5726	10.6908
				639.5	10.5533	10.6711
				640.5	10.534	10.6513
				641.5	10.5143	10.6315
				642.5	10.4943	10.6118
				643.5	10.4743	10.592
				644.5	10.4554	10.5723
				645.5	10.4369	10.5526
				646.5	10.4185	10.5329
				647.5	10.4	10.5132
				648.5	10.3816	10.4936
				649.5	10.3632	10.4739
				650.5	10.3443	10.4543
				651.5	10.3255	10.4346
				652.5	10.3066	10.415
				653.5	10.2865	10.3954
				654.5	10.2665	10.3758
				655.5	10.2468	10.3563
				656.5	10.2293	10.3367
				657.5	10.2119	10.3172
				658.5	10.1942	10.2977
				659.5	10.1753	10.2781
				660.5	10.1563	10.2587
				661.5	10.1374	10.2392
				662.5	10.1185	10.2197
				663.5	10.0997	10.2003
				664.5	10.0805	10.1808
				665.5	10.061	10.1614
				666.5	10.0415	10.142
				667.5	10.023	10.1226
				668.5	10.0055	10.1033
				669.5	9.98807	10.0839
				670.5	9.96983	10.0646
				671.5	9.95107	10.0453
				672.5	9.93231	10.026
				673.5	9.91295	10.0067
				674.5	9.89333	9.98743
				675.5	9.87372	9.96818
				676.5	9.85544	9.94895
				677.5	9.8375	9.92974
				678.5	9.81956	9.91054
				679.5	9.80149	9.89136
				680.5	9.78341	9.8722
				681.5	9.76533	9.85306
				682.5	9.74662	9.83393
				683.5	9.72791	9.81483
				684.5	9.70909	9.79574
				685.5	9.6892	9.77667
				686.5	9.66932	9.75761
				687.5	9.64993	9.73858
				688.5	9.63251	9.71956
				689.5	9.61509	9.70056
				690.5	9.59738	9.68159
				691.5	9.57898	9.66263
				692.5	9.56058	9.64368
				693.5	9.54213	9.62476
				694.5	9.52359	9.60586
				695.5	9.50505	9.58698
				696.5	9.48629	9.56811
				697.5	9.46731	9.54927
				698.5	9.44834	9.53044
				699.5	9.43059	9.51163
				700.5	9.41366	9.49285
				701.5	9.39672	9.47408
				702.5	9.37886	9.45533
				703.5	9.3606	9.4366
				704.5	9.34235	9.4179
				705.5	9.3236	9.39921
				706.5	9.30473	9.38054
				707.5	9.28586	9.36189
				708.5	9.26807	9.34326
				709.5	9.2504	9.32466
				710.5	9.23273	9.30607
				711.5	9.21501	9.2875
				712.5	9.19729	9.26896
				713.5	9.17954	9.25043
				714.5	9.16151	9.23193
				715.5	9.14348	9.21345
				716.5	9.12522	9.19498
				717.5	9.10602	9.17654
				718.5	9.08682	9.15812
				719.5	9.06842	9.13972
				720.5	9.05189	9.12134
				721.5	9.03536	9.10298
				722.5	9.01826	9.08465
				723.5	9.00029	9.06633
				724.5	8.98233	9.04804
				725.5	8.96452	9.02977
				726.5	8.94686	9.01152
				727.5	8.92921	8.99329
				728.5	8.91123	8.97508
				729.5	8.89304	8.9569
				730.5	8.87485	8.93873
				731.5	8.85799	8.92059
				732.5	8.8417	8.90247
				733.5	8.82541	8.88437
				734.5	8.80803	8.8663
				735.5	8.79037	8.84824
				736.5	8.77271	8.83021
				737.5	8.75421	8.8122
				738.5	8.73563	8.79421
				739.5	8.71704	8.77625
				740.5	8.70003	8.75831
				741.5	8.68302	8.74039
				742.5	8.66601	8.72249
				743.5	8.64913	8.70461
				744.5	8.63224	8.68676
				745.5	8.61533	8.66893
				746.5	8.59834	8.65113
				747.5	8.58135	8.63334
				748.5	8.56387	8.61558
				749.5	8.54522	8.59784
				750.5	8.52658	8.58013
				751.5	8.50892	8.56243
				752.5	8.49275	8.54476
				753.5	8.47657	8.52712
				754.5	8.45989	8.50949
				755.5	8.44268	8.49189
				756.5	8.42548	8.47431
				757.5	8.40836	8.45676
				758.5	8.39131	8.43923
				759.5	8.37425	8.42172
				760.5	8.35656	8.40424
				761.5	8.33859	8.38678
				762.5	8.32063	8.36934
				763.5	8.30418	8.35193
				764.5	8.28812	8.33454
				765.5	8.27205	8.31717
				766.5	8.255	8.29983
				767.5	8.23783	8.28251
				768.5	8.22066	8.26521
				769.5	8.20317	8.24794
				770.5	8.18567	8.23069
				771.5	8.16831	8.21347
				772.5	8.15206	8.19627
				773.5	8.13581	8.17909
				774.5	8.11959	8.16194
				775.5	8.10347	8.14481
				776.5	8.08735	8.1277
				777.5	8.07117	8.11062
				778.5	8.05484	8.09357
				779.5	8.03851	8.07653
				780.5	8.02167	8.05953
				781.5	8.00407	8.04254
				782.5	7.98647	8.02558
				783.5	7.97003	8.00865
				784.5	7.95474	7.99173
				785.5	7.93945	7.97485
				786.5	7.92345	7.95798
				787.5	7.90698	7.94114
				788.5	7.89052	7.92433
				789.5	7.87434	7.90754
				790.5	7.85828	7.89077
				791.5	7.84222	7.87403
				792.5	7.82534	7.85731
				793.5	7.80825	7.84062
				794.5	7.79116	7.82395
				795.5	7.77575	7.80731
				796.5	7.76052	7.79069
				797.5	7.74529	7.7741
				798.5	7.72903	7.75753
				799.5	7.71276	7.74098
				800.5	7.69645	7.72446
				801.5	7.67973	7.70797
				802.5	7.66301	7.6915
				803.5	7.64647	7.67505
				804.5	7.63058	7.65863
				805.5	7.6147	7.64223
				806.5	7.5989	7.62586
				807.5	7.58331	7.60951
				808.5	7.56771	7.59319
				809.5	7.55206	7.57689
				810.5	7.53633	7.56062
				811.5	7.5206	7.54437
				812.5	7.50428	7.52815
				813.5	7.48737	7.51195
				814.5	7.47046	7.49578
				815.5	7.45474	7.47963
				816.5	7.43983	7.46351
				817.5	7.42491	7.44741
				818.5	7.40937	7.43133
				819.5	7.39356	7.41529
				820.5	7.37775	7.39926
				821.5	7.36229	7.38326
				822.5	7.34693	7.36729
				823.5	7.33156	7.35134
				824.5	7.31532	7.33542
				825.5	7.29898	7.31952
				826.5	7.28264	7.30365
				827.5	7.26836	7.2878
				828.5	7.25408	7.27198
				829.5	7.23969	7.25618
				830.5	7.22429	7.24041
				831.5	7.20889	7.22466
				832.5	7.19336	7.20894
				833.5	7.17731	7.19324
				834.5	7.16126	7.17757
				835.5	7.14546	7.16192
				836.5	7.13024	7.1463
				837.5	7.11502	7.1307
				838.5	7.1	7.11513
				839.5	7.08529	7.09959
				840.5	7.07059	7.08407
				841.5	7.05577	7.06857
				842.5	7.04085	7.0531
				843.5	7.02593	7.03765
				844.5	7.01011	7.02223
				845.5	6.99369	7.00684
				846.5	6.97728	6.99147
				847.5	6.96249	6.97612
				848.5	6.9484	6.96081
				849.5	6.93431	6.94551
				850.5	6.91963	6.93024
				851.5	6.9048	6.915
				852.5	6.88997	6.89978
				853.5	6.87549	6.88459
				854.5	6.86106	6.86942
				855.5	6.84662	6.85428
				856.5	6.83101	6.83916
				857.5	6.8154	6.82407
				858.5	6.79999	6.809
				859.5	6.78638	6.79396
				860.5	6.77276	6.77895
				861.5	6.75892	6.76395
				862.5	6.74416	6.74899
				863.5	6.7294	6.73405
				864.5	6.71455	6.71913
				865.5	6.69946	6.70424
				866.5	6.68438	6.68938
				867.5	6.66938	6.67454
				868.5	6.6545	6.65973
				869.5	6.63962	6.64494
				870.5	6.62518	6.63017
				871.5	6.6112	6.61544
				872.5	6.59722	6.60072
				873.5	6.58332	6.58603
				874.5	6.56948	6.57137
				875.5	6.55564	6.55673
				876.5	6.54072	6.54212
				877.5	6.52534	6.52754
				878.5	6.50996	6.51297
				879.5	6.49606	6.49844
				880.5	6.48254	6.48393
				881.5	6.46901	6.46944
				882.5	6.45488	6.45498
				883.5	6.44069	6.44054
				884.5	6.42649	6.42613
				885.5	6.41292	6.41175
				886.5	6.39934	6.39739
				887.5	6.38562	6.38305
				888.5	6.37061	6.36874
				889.5	6.35559	6.35446
				890.5	6.341	6.3402
				891.5	6.3281	6.32596
				892.5	6.3152	6.31175
				893.5	6.30193	6.29757
				894.5	6.28779	6.28341
				895.5	6.27365	6.26927
				896.5	6.25954	6.25516
				897.5	6.24547	6.24108
				898.5	6.23139	6.22702
				899.5	6.2174	6.21299
				900.5	6.2035	6.19898
				901.5	6.18959	6.18499
				902.5	6.17612	6.17104
				903.5	6.16293	6.1571
				904.5	6.14974	6.14319
				905.5	6.13649	6.12931
				906.5	6.12322	6.11545
				907.5	6.10995	6.10161
				908.5	6.09569	6.08781
				909.5	6.08118	6.07402
				910.5	6.06668	6.06026
				911.5	6.05403	6.04653
				912.5	6.04158	6.03282
				913.5	6.02914	6.01913
				914.5	6.01582	6.00547
				915.5	6.0025	5.99184
				916.5	5.98924	5.97823
				917.5	5.97654	5.96464
				918.5	5.96384	5.95108
				919.5	5.95083	5.93755
				920.5	5.93661	5.92404
				921.5	5.92239	5.91055
				922.5	5.90876	5.89709
				923.5	5.89652	5.88365
				924.5	5.88428	5.87024
				925.5	5.87169	5.85685
				926.5	5.85858	5.84349
				927.5	5.84546	5.83015
				928.5	5.83214	5.81684
				929.5	5.81861	5.80355
				930.5	5.80507	5.79029
				931.5	5.79165	5.77705
				932.5	5.77831	5.76383
				933.5	5.76496	5.75064
				934.5	5.7523	5.73748
				935.5	5.73994	5.72433
				936.5	5.72757	5.71122
				937.5	5.71522	5.69813
				938.5	5.70286	5.68506
				939.5	5.69051	5.67201
				940.5	5.67691	5.659
				941.5	5.66317	5.646
				942.5	5.64943	5.63303
				943.5	5.63748	5.62009
				944.5	5.62553	5.60716
				945.5	5.61354	5.59427
				946.5	5.60116	5.58139
				947.5	5.58879	5.56855
				948.5	5.57649	5.55572
				949.5	5.56451	5.54292
				950.5	5.55253	5.53015
				951.5	5.54009	5.5174
				952.5	5.52657	5.50467
				953.5	5.51305	5.49197
				954.5	5.50033	5.47929
				955.5	5.48879	5.46663
				956.5	5.47724	5.454
				957.5	5.4652	5.4414
				958.5	5.45266	5.42882
				959.5	5.44011	5.41626
				960.5	5.42774	5.40372
				961.5	5.41549	5.39121
				962.5	5.40324	5.37873
				963.5	5.39099	5.36627
				964.5	5.37875	5.35383
				965.5	5.36651	5.34141
				966.5	5.35468	5.32902
				967.5	5.34294	5.31666
				968.5	5.33121	5.30431
				969.5	5.31941	5.292
				970.5	5.30759	5.2797
				971.5	5.29578	5.26743
				972.5	5.28269	5.25518
				973.5	5.2696	5.24296
				974.5	5.2567	5.23076
				975.5	5.24544	5.21859
				976.5	5.23417	5.20643
				977.5	5.22278	5.1943
				978.5	5.21086	5.1822
				979.5	5.19894	5.17012
				980.5	5.18717	5.15806
				981.5	5.17577	5.14603
				982.5	5.16436	5.13402
				983.5	5.15247	5.12203
				984.5	5.13983	5.11007
				985.5	5.12719	5.09813
				986.5	5.11545	5.08621
				987.5	5.10461	5.07432
				988.5	5.09377	5.06245
				989.5	5.08243	5.0506
				990.5	5.07075	5.03878
				991.5	5.05906	5.02698
				992.5	5.04735	5.0152
				993.5	5.03564	5.00345
				994.5	5.02392	4.99172
				995.5	5.01249	4.98001
				996.5	5.00113	4.96833
				997.5	4.98977	4.95667
				998.5	4.97882	4.94503
				999.5	4.9679	4.93342
				1000.5	4.95699	4.92183
				1001.5	4.94581	4.91026
				1002.5	4.93464	4.89872
				1003.5	4.92335	4.88719
				1004.5	4.91113	4.8757
				1005.5	4.89891	4.86422
				1006.5	4.88702	4.85277
				1007.5	4.87643	4.84134
				1008.5	4.86584	4.82993
				1009.5	4.8551	4.81855
				1010.5	4.844	4.80719
				1011.5	4.83291	4.79585
				1012.5	4.82202	4.78453
				1013.5	4.81145	4.77324
				1014.5	4.80088	4.76197
				1015.5	4.7896	4.75072
				1016.5	4.77763	4.7395
				1017.5	4.76566	4.7283
				1018.5	4.75466	4.71712
				1019.5	4.7443	4.70596
				1020.5	4.73395	4.69483
				1021.5	4.72327	4.68372
				1022.5	4.71244	4.67263
				1023.5	4.70162	4.66156
				1024.5	4.69062	4.65052
				1025.5	4.67957	4.63949
				1026.5	4.66853	4.6285
				1027.5	4.65775	4.61752
				1028.5	4.647	4.60656
				1029.5	4.63625	4.59563
				1030.5	4.62589	4.58472
				1031.5	4.61552	4.57383
				1032.5	4.60517	4.56297
				1033.5	4.59491	4.55213
				1034.5	4.58465	4.54131
				1035.5	4.57409	4.53051
				1036.5	4.56231	4.51973
				1037.5	4.55053	4.50898
				1038.5	4.53931	4.49824
				1039.5	4.52943	4.48753
				1040.5	4.51955	4.47684
				1041.5	4.50936	4.46618
				1042.5	4.49873	4.45553
				1043.5	4.4881	4.44491
				1044.5	4.4779	4.43431
				1045.5	4.46813	4.42373
				1046.5	4.45836	4.41318
				1047.5	4.44781	4.40264
				1048.5	4.43673	4.39213
				1049.5	4.42566	4.38164
				1050.5	4.41566	4.37117
				1051.5	4.40612	4.36072
				1052.5	4.39658	4.35029
				1053.5	4.38648	4.33989
				1054.5	4.37624	4.3295
				1055.5	4.366	4.31914
				1056.5	4.35583	4.3088
				1057.5	4.34567	4.29848
				1058.5	4.33551	4.28819
				1059.5	4.32542	4.27791
				1060.5	4.31533	4.26766
				1061.5	4.30525	4.25742
				1062.5	4.2953	4.24721
				1063.5	4.28535	4.23702
				1064.5	4.27548	4.22685
				1065.5	4.26595	4.21671
				1066.5	4.25643	4.20658
				1067.5	4.24643	4.19648
				1068.5	4.23534	4.18639
				1069.5	4.22425	4.17633
				1070.5	4.21398	4.16629
				1071.5	4.20492	4.15627
				1072.5	4.19586	4.14627
				1073.5	4.18648	4.13629
				1074.5	4.17676	4.12633
				1075.5	4.16705	4.1164
				1076.5	4.1576	4.10648
				1077.5	4.14833	4.09659
				1078.5	4.13907	4.08671
				1079.5	4.12899	4.07686
				1080.5	4.11856	4.06703
				1081.5	4.10814	4.05722
				1082.5	4.09904	4.04743
				1083.5	4.09028	4.03766
				1084.5	4.08151	4.02791
				1085.5	4.07207	4.01818
				1086.5	4.06255	4.00848
				1087.5	4.05303	3.99879
				1088.5	4.04327	3.98912
				1089.5	4.0335	3.97948
				1090.5	4.02376	3.96985
				1091.5	4.01421	3.96025
				1092.5	4.00467	3.95066
				1093.5	3.99521	3.9411
				1094.5	3.98613	3.93156
				1095.5	3.97704	3.92204
				1096.5	3.96806	3.91253
				1097.5	3.9593	3.90305
				1098.5	3.95054	3.89359
				1099.5	3.94119	3.88415
				1100.5	3.93096	3.87473
				1101.5	3.92073	3.86532
				1102.5	3.91134	3.85594
				1103.5	3.90279	3.84658
				1104.5	3.89424	3.83724
				1105.5	3.88534	3.82792
				1106.5	3.87619	3.81862
				1107.5	3.86705	3.80934
				1108.5	3.85838	3.80008
				1109.5	3.8499	3.79084
				1110.5	3.84142	3.78162
				1111.5	3.83175	3.77242
				1112.5	3.82177	3.76324
				1113.5	3.81179	3.75407
				1114.5	3.80344	3.74493
				1115.5	3.79528	3.73581
				1116.5	3.78712	3.72671
				1117.5	3.77811	3.71763
				1118.5	3.76911	3.70856
				1119.5	3.76007	3.69952
				1120.5	3.75079	3.6905
				1121.5	3.74152	3.68149
				1122.5	3.73234	3.67251
				1123.5	3.72359	3.66354
				1124.5	3.71483	3.6546
				1125.5	3.70617	3.64567
				1126.5	3.69772	3.63677
				1127.5	3.68926	3.62788
				1128.5	3.68089	3.61901
				1129.5	3.67265	3.61016
				1130.5	3.6644	3.60133
				1131.5	3.65548	3.59252
				1132.5	3.64588	3.58373
				1133.5	3.63628	3.57496
				1134.5	3.62767	3.56621
				1135.5	3.61972	3.55748
				1136.5	3.61177	3.54876
				1137.5	3.60344	3.54007
				1138.5	3.59494	3.53139
				1139.5	3.58644	3.52273
				1140.5	3.57828	3.5141
				1141.5	3.57021	3.50548
				1142.5	3.56214	3.49688
				1143.5	3.55306	3.4883
				1144.5	3.54387	3.47973
				1145.5	3.53467	3.47119
				1146.5	3.52688	3.46267
				1147.5	3.51909	3.45416
				1148.5	3.51124	3.44567
				1149.5	3.50284	3.4372
				1150.5	3.49444	3.42875
				1151.5	3.486	3.42032
				1152.5	3.47743	3.41191
				1153.5	3.46886	3.40352
				1154.5	3.46042	3.39514
				1155.5	3.45226	3.38678
				1156.5	3.4441	3.37844
				1157.5	3.436	3.37012
				1158.5	3.42798	3.36182
				1159.5	3.41997	3.35354
				1160.5	3.41215	3.34527
				1161.5	3.40455	3.33703
				1162.5	3.39694	3.3288
				1163.5	3.38853	3.32059
				1164.5	3.37959	3.3124
				1165.5	3.37064	3.30422
				1166.5	3.36286	3.29607
				1167.5	3.35557	3.28793
				1168.5	3.34829	3.27981
				1169.5	3.34029	3.27171
				1170.5	3.33213	3.26363
				1171.5	3.32396	3.25556
				1172.5	3.31639	3.24751
				1173.5	3.30889	3.23948
				1174.5	3.30139	3.23147
				1175.5	3.29294	3.22348
				1176.5	3.2845	3.2155
				1177.5	3.27619	3.20755
				1178.5	3.26906	3.19961
				1179.5	3.26193	3.19168
				1180.5	3.25471	3.18378
				1181.5	3.24709	3.17589
				1182.5	3.23948	3.16802
				1183.5	3.23168	3.16017
				1184.5	3.22343	3.15234
				1185.5	3.21518	3.14452
				1186.5	3.20723	3.13672
				1187.5	3.19975	3.12894
				1188.5	3.19227	3.12118
				1189.5	3.18477	3.11343
				1190.5	3.17725	3.1057
				1191.5	3.16974	3.09799
				1192.5	3.16245	3.09029
				1193.5	3.15532	3.08262
				1194.5	3.1482	3.07496
				1195.5	3.14005	3.06732
				1196.5	3.13147	3.05969
				1197.5	3.12289	3.05208
				1198.5	3.11572	3.04449
				1199.5	3.10891	3.03692
				1200.5	3.1021	3.02936
				1201.5	3.09467	3.02182
				1202.5	3.08718	3.0143
				1203.5	3.07969	3.00679
				1204.5	3.07257	2.99931
				1205.5	3.06545	2.99183
				1206.5	3.05826	2.98438
				1207.5	3.05041	2.97694
				1208.5	3.04256	2.96952
				1209.5	3.03495	2.96212
				1210.5	3.0283	2.95473
				1211.5	3.02164	2.94736
				1212.5	3.01487	2.94
				1213.5	3.00782	2.93267
				1214.5	3.00078	2.92535
				1215.5	2.9935	2.91804
				1216.5	2.98587	2.91076
				1217.5	2.97824	2.90349
				1218.5	2.97103	2.89623
				1219.5	2.96426	2.88899
				1220.5	2.95748	2.88177
				1221.5	2.9506	2.87457
				1222.5	2.94367	2.86738
				1223.5	2.93674	2.86021
				1224.5	2.93022	2.85305
				1225.5	2.92388	2.84592
				1226.5	2.91754	2.83879
				1227.5	2.90993	2.83169
				1228.5	2.902	2.8246
				1229.5	2.89407	2.81752
				1230.5	2.88751	2.81046
				1231.5	2.88109	2.80342
				1232.5	2.87467	2.7964
				1233.5	2.86765	2.78939
				1234.5	2.86063	2.7824
				1235.5	2.85366	2.77542
				1236.5	2.84706	2.76846
				1237.5	2.84046	2.76151
				1238.5	2.83366	2.75458
				1239.5	2.82603	2.74767
				1240.5	2.8184	2.74077
				1241.5	2.81113	2.73389
				1242.5	2.80472	2.72702
				1243.5	2.7983	2.72017
				1244.5	2.79184	2.71334
				1245.5	2.7853	2.70652
				1246.5	2.77877	2.69972
				1247.5	2.77193	2.69293
				1248.5	2.76479	2.68616
				1249.5	2.75765	2.6794
				1250.5	2.75086	2.67266
				1251.5	2.74431	2.66594
				1252.5	2.73775	2.65923
				1253.5	2.73116	2.65254
				1254.5	2.72457	2.64586
				1255.5	2.71797	2.6392
				1256.5	2.71203	2.63255
				1257.5	2.70625	2.62592
				1258.5	2.70048	2.6193
				1259.5	2.69324	2.6127
				1260.5	2.68584	2.60611
				1261.5	2.67844	2.59954
				1262.5	2.67262	2.59299
				1263.5	2.66679	2.58645
				1264.5	2.66091	2.57992
				1265.5	2.65449	2.57341
				1266.5	2.64808	2.56692
				1267.5	2.64172	2.56044
				1268.5	2.63559	2.55397
				1269.5	2.62947	2.54752
				1270.5	2.62301	2.54109
				1271.5	2.6158	2.53467
				1272.5	2.60859	2.52826
				1273.5	2.60177	2.52187
				1274.5	2.59555	2.5155
				1275.5	2.58932	2.50914
				1276.5	2.58314	2.50279
				1277.5	2.57699	2.49646
				1278.5	2.57085	2.49015
				1279.5	2.56444	2.48384
				1280.5	2.55787	2.47756
				1281.5	2.55129	2.47129
				1282.5	2.54517	2.46503
				1283.5	2.53923	2.45879
				1284.5	2.53329	2.45256
				1285.5	2.52698	2.44635
				1286.5	2.52058	2.44015
				1287.5	2.51418	2.43396
				1288.5	2.50859	2.42779
				1289.5	2.50308	2.42164
				1290.5	2.49758	2.4155
				1291.5	2.49085	2.40937
				1292.5	2.48413	2.40326
				1293.5	2.47754	2.39716
				1294.5	2.47218	2.39108
				1295.5	2.46682	2.38501
				1296.5	2.46133	2.37895
				1297.5	2.45533	2.37291
				1298.5	2.44933	2.36689
				1299.5	2.44349	2.36087
				1300.5	2.438	2.35487
				1301.5	2.4325	2.34889
				1302.5	2.42674	2.34292
				1303.5	2.42057	2.33696
				1304.5	2.41441	2.33102
				1305.5	2.40852	2.32509
				1306.5	2.4029	2.31918
				1307.5	2.39728	2.31328
				1308.5	2.39178	2.30739
				1309.5	2.38635	2.30152
				1310.5	2.38092	2.29566
				1311.5	2.37508	2.28982
				1312.5	2.36907	2.28399
				1313.5	2.36306	2.27817
				1314.5	2.3575	2.27237
				1315.5	2.35206	2.26658
				1316.5	2.34662	2.2608
				1317.5	2.34089	2.25504
				1318.5	2.33512	2.24929
				1319.5	2.32936	2.24356
				1320.5	2.32426	2.23784
				1321.5	2.31916	2.23213
				1322.5	2.31396	2.22643
				1323.5	2.3078	2.22075
				1324.5	2.30165	2.21508
				1325.5	2.29572	2.20943
				1326.5	2.2907	2.20379
				1327.5	2.28568	2.19816
				1328.5	2.28053	2.19255
				1329.5	2.27511	2.18695
				1330.5	2.26969	2.18136
				1331.5	2.26438	2.17579
				1332.5	2.25921	2.17023
				1333.5	2.25405	2.16468
				1334.5	2.24849	2.15914
				1335.5	2.24255	2.15362
				1336.5	2.23661	2.14812
				1337.5	2.23109	2.14262
				1338.5	2.22585	2.13714
				1339.5	2.22061	2.13167
				1340.5	2.21555	2.12621
				1341.5	2.21056	2.12077
				1342.5	2.20557	2.11534
				1343.5	2.19979	2.10993
				1344.5	2.1938	2.10452
				1345.5	2.18781	2.09913
				1346.5	2.18275	2.09375
				1347.5	2.17779	2.08839
				1348.5	2.17283	2.08303
				1349.5	2.1674	2.0777
				1350.5	2.16198	2.07237
				1351.5	2.15663	2.06705
				1352.5	2.15194	2.06175
				1353.5	2.14726	2.05646
				1354.5	2.14235	2.05119
				1355.5	2.13657	2.04592
				1356.5	2.13079	2.04067
				1357.5	2.12541	2.03544
				1358.5	2.12098	2.03021
				1359.5	2.11656	2.025
				1360.5	2.11183	2.0198
				1361.5	2.10666	2.01461
				1362.5	2.10148	2.00943
				1363.5	2.09642	2.00427
				1364.5	2.09149	1.99912
				1365.5	2.08655	1.99398
				1366.5	2.08139	1.98885
				1367.5	2.07608	1.98374
				1368.5	2.07077	1.97864
				1369.5	2.06588	1.97355
				1370.5	2.06118	1.96847
				1371.5	2.05648	1.96341
				1372.5	2.05186	1.95835
				1373.5	2.04725	1.95331
				1374.5	2.04264	1.94828
				1375.5	2.03721	1.94327
				1376.5	2.03169	1.93826
				1377.5	2.02617	1.93327
				1378.5	2.02148	1.92829
				1379.5	2.01678	1.92332
				1380.5	2.01206	1.91837
				1381.5	2.00713	1.91342
				1382.5	2.00221	1.90849
				1383.5	1.99741	1.90357
				1384.5	1.99314	1.89866
				1385.5	1.98886	1.89376
				1386.5	1.98419	1.88888
				1387.5	1.97859	1.88401
				1388.5	1.97298	1.87915
				1389.5	1.96797	1.8743
				1390.5	1.96384	1.86946
				1391.5	1.95972	1.86463
				1392.5	1.95532	1.85982
				1393.5	1.95063	1.85502
				1394.5	1.94595	1.85022
				1395.5	1.9413	1.84545
				1396.5	1.93666	1.84068
				1397.5	1.93202	1.83592
				1398.5	1.9273	1.83118
				1399.5	1.92253	1.82644
				1400.5	1.91777	1.82172
				1401.5	1.91304	1.81701
				1402.5	1.90831	1.81231
				1403.5	1.90358	1.80762
				1404.5	1.89915	1.80295
				1405.5	1.89475	1.79828
				1406.5	1.89034	1.79363
				1407.5	1.88553	1.78899
				1408.5	1.88071	1.78436
				1409.5	1.87599	1.77974
				1410.5	1.87205	1.77513
				1411.5	1.86811	1.77053
				1412.5	1.86403	1.76595
				1413.5	1.85943	1.76137
				1414.5	1.85482	1.75681
				1415.5	1.8504	1.75226
				1416.5	1.84641	1.74771
				1417.5	1.84242	1.74318
				1418.5	1.83789	1.73866
				1419.5	1.83255	1.73416
				1420.5	1.82722	1.72966
				1421.5	1.82247	1.72517
				1422.5	1.81832	1.7207
				1423.5	1.81416	1.71623
				1424.5	1.80977	1.71178
				1425.5	1.80521	1.70734
				1426.5	1.80065	1.7029
				1427.5	1.79619	1.69848
				1428.5	1.79176	1.69407
				1429.5	1.78734	1.68967
				1430.5	1.78305	1.68529
				1431.5	1.77881	1.68091
				1432.5	1.77456	1.67654
				1433.5	1.77035	1.67218
				1434.5	1.76614	1.66784
				1435.5	1.76193	1.6635
				1436.5	1.7581	1.65918
				1437.5	1.75426	1.65486
				1438.5	1.7503	1.65056
				1439.5	1.74531	1.64627
				1440.5	1.74031	1.64199
				1441.5	1.73556	1.63771
				1442.5	1.7318	1.63345
				1443.5	1.72803	1.6292
				1444.5	1.72408	1.62496
				1445.5	1.71969	1.62073
				1446.5	1.71531	1.61651
				1447.5	1.71123	1.6123
				1448.5	1.7076	1.6081
				1449.5	1.70398	1.60391
				1450.5	1.69982	1.59974
				1451.5	1.69514	1.59557
				1452.5	1.69045	1.59141
				1453.5	1.6864	1.58726
				1454.5	1.68278	1.58312
				1455.5	1.67916	1.579
				1456.5	1.67512	1.57488
				1457.5	1.6709	1.57077
				1458.5	1.66668	1.56668
				1459.5	1.66257	1.56259
				1460.5	1.65849	1.55851
				1461.5	1.65442	1.55445
				1462.5	1.65058	1.55039
				1463.5	1.64677	1.54634
				1464.5	1.64296	1.54231
				1465.5	1.63903	1.53828
				1466.5	1.63511	1.53426
				1467.5	1.63122	1.53026
				1468.5	1.62774	1.52626
				1469.5	1.62425	1.52227
				1470.5	1.62053	1.5183
				1471.5	1.61584	1.51433
				1472.5	1.61116	1.51037
				1473.5	1.60684	1.50642
				1474.5	1.60336	1.50249
				1475.5	1.59989	1.49856
				1476.5	1.59616	1.49464
				1477.5	1.59207	1.49073
				1478.5	1.58798	1.48683
				1479.5	1.58422	1.48294
				1480.5	1.58079	1.47906
				1481.5	1.57737	1.47519
				1482.5	1.57344	1.47133
				1483.5	1.56917	1.46748
				1484.5	1.5649	1.46364
				1485.5	1.56117	1.45981
				1486.5	1.55766	1.45598
				1487.5	1.55416	1.45217
				1488.5	1.55057	1.44837
				1489.5	1.54695	1.44457
				1490.5	1.54333	1.44079
				1491.5	1.53946	1.43701
				1492.5	1.53555	1.43325
				1493.5	1.53165	1.42949
				1494.5	1.52807	1.42574
				1495.5	1.52449	1.422
				1496.5	1.52088	1.41828
				1497.5	1.51699	1.41456
				1498.5	1.51311	1.41085
				1499.5	1.5094	1.40715
				1500.5	1.50638	1.40345
				1501.5	1.50336	1.39977
				1502.5	1.50003	1.3961
				1503.5	1.49598	1.39243
				1504.5	1.49193	1.38878
				1505.5	1.48833	1.38513
				1506.5	1.48538	1.3815
				1507.5	1.48243	1.37787
				1508.5	1.4791	1.37425
				1509.5	1.47537	1.37064
				1510.5	1.47164	1.36704
				1511.5	1.46817	1.36345
				1512.5	1.46487	1.35986
				1513.5	1.46156	1.35629
				1514.5	1.45781	1.35272
				1515.5	1.45387	1.34917
				1516.5	1.44993	1.34562
				1517.5	1.44668	1.34208
				1518.5	1.4436	1.33855
				1519.5	1.44053	1.33503
				1520.5	1.43733	1.33152
				1521.5	1.43412	1.32802
				1522.5	1.43091	1.32452
				1523.5	1.42698	1.32104
				1524.5	1.42305	1.31756
				1525.5	1.41918	1.31409
				1526.5	1.41579	1.31063
				1527.5	1.41239	1.30718
				1528.5	1.40899	1.30374
				1529.5	1.40555	1.30031
				1530.5	1.40211	1.29688
				1531.5	1.39881	1.29346
				1532.5	1.39586	1.29006
				1533.5	1.39289	1.28666
				1534.5	1.38954	1.28327
				1535.5	1.38558	1.27988
				1536.5	1.38162	1.27651
				1537.5	1.37814	1.27314
				1538.5	1.37512	1.26979
				1539.5	1.37211	1.26644
				1540.5	1.36872	1.2631
				1541.5	1.36508	1.25977
				1542.5	1.36144	1.25644
				1543.5	1.3583	1.25313
				1544.5	1.35537	1.24982
				1545.5	1.35244	1.24652
				1546.5	1.34917	1.24323
				1547.5	1.3458	1.23995
				1548.5	1.34243	1.23668
				1549.5	1.33945	1.23341
				1550.5	1.33651	1.23016
				1551.5	1.33356	1.22691
				1552.5	1.33062	1.22367
				1553.5	1.32768	1.22043
				1554.5	1.32468	1.21721
				1555.5	1.32116	1.21399
				1556.5	1.31764	1.21078
				1557.5	1.31426	1.20758
				1558.5	1.31142	1.20439
				1559.5	1.30858	1.20121
				1560.5	1.30566	1.19803
				1561.5	1.30253	1.19486
				1562.5	1.29939	1.1917
				1563.5	1.29643	1.18855
				1564.5	1.29373	1.18541
				1565.5	1.29103	1.18227
				1566.5	1.28775	1.17914
				1567.5	1.2839	1.17602
				1568.5	1.28004	1.17291
				1569.5	1.2769	1.1698
				1570.5	1.27425	1.16671
				1571.5	1.27159	1.16362
				1572.5	1.26849	1.16054
				1573.5	1.26519	1.15746
				1574.5	1.26189	1.1544
				1575.5	1.25903	1.15134
				1576.5	1.25629	1.14829
				1577.5	1.25355	1.14525
				1578.5	1.25043	1.14221
				1579.5	1.24727	1.13918
				1580.5	1.2441	1.13617
				1581.5	1.24158	1.13315
				1582.5	1.23905	1.13015
				1583.5	1.2365	1.12715
				1584.5	1.23367	1.12416
				1585.5	1.23085	1.12118
				1586.5	1.22794	1.11821
				1587.5	1.22472	1.11524
				1588.5	1.22149	1.11228
				1589.5	1.21849	1.10933
				1590.5	1.216	1.10639
				1591.5	1.21351	1.10345
				1592.5	1.21074	1.10052
				1593.5	1.20753	1.0976
				1594.5	1.20432	1.09469
				1595.5	1.20147	1.09178
				1596.5	1.19897	1.08888
				1597.5	1.19647	1.08599
				1598.5	1.19348	1.0831
				1599.5	1.19015	1.08023
				1600.5	1.18683	1.07736
				1601.5	1.18407	1.07449
				1602.5	1.18154	1.07164
				1603.5	1.17902	1.06879
				1604.5	1.17616	1.06595
				1605.5	1.17322	1.06312
				1606.5	1.17027	1.06029
				1607.5	1.16734	1.05747
				1608.5	1.16441	1.05466
				1609.5	1.16147	1.05185
				1610.5	1.15866	1.04905
				1611.5	1.15585	1.04626
				1612.5	1.15305	1.04348
				1613.5	1.15039	1.0407
				1614.5	1.14772	1.03793
				1615.5	1.14511	1.03517
				1616.5	1.1427	1.03242
				1617.5	1.1403	1.02967
				1618.5	1.13767	1.02693
				1619.5	1.13448	1.02419
				1620.5	1.1313	1.02146
				1621.5	1.12843	1.01874
				1622.5	1.12603	1.01603
				1623.5	1.12362	1.01332
				1624.5	1.12095	1.01062
				1625.5	1.11801	1.00793
				1626.5	1.11508	1.00524
				1627.5	1.11252	1.00257
				1628.5	1.11022	0.999894
				1629.5	1.10792	0.997228
				1630.5	1.10517	0.994569
				1631.5	1.10222	0.991918
				1632.5	1.09926	0.989272
				1633.5	1.09702	0.986634
				1634.5	1.09496	0.984003
				1635.5	1.09291	0.981378
				1636.5	1.09042	0.97876
				1637.5	1.08788	0.976148
				1638.5	1.08535	0.973543
				1639.5	1.08294	0.970945
				1640.5	1.08054	0.968354
				1641.5	1.07816	0.965769
				1642.5	1.07594	0.963191
				1643.5	1.07372	0.960619
				1644.5	1.07146	0.958054
				1645.5	1.06898	0.955496
				1646.5	1.0665	0.952944
				1647.5	1.0641	0.950398
				1648.5	1.0619	0.947859
				1649.5	1.05969	0.945327
				1650.5	1.05713	0.942801
				1651.5	1.05404	0.940282
				1652.5	1.05096	0.937769
				1653.5	1.04835	0.935262
				1654.5	1.04624	0.932762
				1655.5	1.04412	0.930269
				1656.5	1.04165	0.927781
				1657.5	1.03894	0.9253
				1658.5	1.03623	0.922826
				1659.5	1.03406	0.920358
				1660.5	1.03213	0.917896
				1661.5	1.0302	0.91544
				1662.5	1.02763	0.912991
				1663.5	1.0249	0.910548
				1664.5	1.02217	0.908112
				1665.5	1.01994	0.905681
				1666.5	1.01777	0.903257
				1667.5	1.01559	0.900839
				1668.5	1.01324	0.898428
				1669.5	1.01089	0.896022
				1670.5	1.00854	0.893623
				1671.5	1.00616	0.89123
				1672.5	1.00379	0.888843
				1673.5	1.00146	0.886462
				1674.5	0.999325	0.884087
				1675.5	0.997188	0.881719
				1676.5	0.99502	0.879356
				1677.5	0.992777	0.877
				1678.5	0.990533	0.874649
				1679.5	0.988449	0.872305
				1680.5	0.986603	0.869967
				1681.5	0.984758	0.867634
				1682.5	0.98242	0.865308
				1683.5	0.979589	0.862988
				1684.5	0.976758	0.860674
				1685.5	0.974609	0.858365
				1686.5	0.972913	0.856063
				1687.5	0.971218	0.853767
				1688.5	0.968977	0.851476
				1689.5	0.966504	0.849192
				1690.5	0.96403	0.846913
				1691.5	0.961885	0.84464
				1692.5	0.959823	0.842373
				1693.5	0.957761	0.840112
				1694.5	0.955235	0.837857
				1695.5	0.952658	0.835608
				1696.5	0.950081	0.833364
				1697.5	0.94806	0.831126
				1698.5	0.946039	0.828894
				1699.5	0.944016	0.826668
				1700.5	0.941979	0.824447
				1701.5	0.939942	0.822232
				1702.5	0.937815	0.820023
				1703.5	0.935328	0.81782
				1704.5	0.932842	0.815622
				1705.5	0.930578	0.81343
				1706.5	0.928835	0.811244
				1707.5	0.927093	0.809064
				1708.5	0.925167	0.806889
				1709.5	0.922967	0.804719
				1710.5	0.920767	0.802555
				1711.5	0.918899	0.800397
				1712.5	0.917362	0.798245
				1713.5	0.915825	0.796098
				1714.5	0.913645	0.793956
				1715.5	0.911037	0.79182
				1716.5	0.908429	0.78969
				1717.5	0.906557	0.787565
				1718.5	0.905	0.785446
				1719.5	0.903442	0.783332
				1720.5	0.901302	0.781224
				1721.5	0.899015	0.779121
				1722.5	0.896729	0.777023
				1723.5	0.894981	0.774931
				1724.5	0.893294	0.772845
				1725.5	0.891607	0.770764
				1726.5	0.889514	0.768688
				1727.5	0.887421	0.766617
				1728.5	0.885351	0.764552
				1729.5	0.883491	0.762493
				1730.5	0.881631	0.760438
				1731.5	0.879813	0.758389
				1732.5	0.878161	0.756346
				1733.5	0.876508	0.754307
				1734.5	0.874599	0.752274
				1735.5	0.87209	0.750247
				1736.5	0.869581	0.748224
				1737.5	0.86742	0.746207
				1738.5	0.865782	0.744195
				1739.5	0.864145	0.742188
				1740.5	0.862187	0.740187
				1741.5	0.859908	0.73819
				1742.5	0.857629	0.736199
				1743.5	0.855786	0.734213
				1744.5	0.854233	0.732232
				1745.5	0.85268	0.730257
				1746.5	0.850521	0.728286
				1747.5	0.848102	0.726321
				1748.5	0.845684	0.724361
				1749.5	0.8439	0.722405
				1750.5	0.842275	0.720455
				1751.5	0.84065	0.71851
				1752.5	0.838535	0.71657
				1753.5	0.836365	0.714636
				1754.5	0.834196	0.712706
				1755.5	0.832738	0.710781
				1756.5	0.831279	0.708861
				1757.5	0.829811	0.706946
				1758.5	0.828247	0.705037
				1759.5	0.826683	0.703132
				1760.5	0.825079	0.701232
				1761.5	0.823314	0.699337
				1762.5	0.821549	0.697447
				1763.5	0.819853	0.695562
				1764.5	0.818318	0.693682
				1765.5	0.816783	0.691807
				1766.5	0.814953	0.689936
				1767.5	0.812681	0.688071
				1768.5	0.810409	0.68621
				1769.5	0.808556	0.684355
				1770.5	0.807122	0.682504
				1771.5	0.805688	0.680658
				1772.5	0.803871	0.678817
				1773.5	0.801799	0.67698
				1774.5	0.799727	0.675149
				1775.5	0.798167	0.673322
				1776.5	0.796828	0.6715
				1777.5	0.795489	0.669683
				1778.5	0.793395	0.66787
				1779.5	0.791113	0.666062
				1780.5	0.78883	0.664259
				1781.5	0.787313	0.662461
				1782.5	0.785882	0.660667
				1783.5	0.78445	0.658878
				1784.5	0.782602	0.657094
				1785.5	0.780754	0.655315
				1786.5	0.778911	0.65354
				1787.5	0.777106	0.651769
				1788.5	0.775302	0.650004
				1789.5	0.773551	0.648243
				1790.5	0.772014	0.646486
				1791.5	0.770477	0.644734
				1792.5	0.76884	0.642987
				1793.5	0.76697	0.641245
				1794.5	0.765099	0.639506
				1795.5	0.763325	0.637773
				1796.5	0.761695	0.636044
				1797.5	0.760066	0.634319
				1798.5	0.758293	0.6326
				1799.5	0.756378	0.630884
				1800.5	0.754462	0.629173
				1801.5	0.753192	0.627467
				1802.5	0.752351	0.625765
				1803.5	0.75151	0.624067
				1804.5	0.749967	0.622374
				1805.5	0.748124	0.620686
				1806.5	0.74628	0.619001
				1807.5	0.744856	0.617322
				1808.5	0.743538	0.615646
				1809.5	0.74222	0.613975
				1810.5	0.740329	0.612309
				1811.5	0.738374	0.610647
				1812.5	0.736419	0.608989
				1813.5	0.734756	0.607335
				1814.5	0.733093	0.605686
				1815.5	0.731434	0.604042
				1816.5	0.7298	0.602401
				1817.5	0.728167	0.600765
				1818.5	0.726549	0.599133
				1819.5	0.724991	0.597506
				1820.5	0.723434	0.595882
				1821.5	0.721915	0.594263
				1822.5	0.720485	0.592648
				1823.5	0.719056	0.591038
				1824.5	0.717474	0.589432
				1825.5	0.715665	0.58783
				1826.5	0.713856	0.586232
				1827.5	0.712344	0.584638
				1828.5	0.711129	0.583049
				1829.5	0.709914	0.581464
				1830.5	0.708259	0.579882
				1831.5	0.70631	0.578306
				1832.5	0.704361	0.576733
				1833.5	0.703045	0.575164
				1834.5	0.702	0.5736
				1835.5	0.700956	0.572039
				1836.5	0.699364	0.570483
				1837.5	0.697636	0.568931
				1838.5	0.695908	0.567383
				1839.5	0.694624	0.565839
				1840.5	0.69339	0.564299
				1841.5	0.692156	0.562763
				1842.5	0.69037	0.561231
				1843.5	0.688584	0.559704
				1844.5	0.68685	0.55818
				1845.5	0.685579	0.55666
				1846.5	0.684308	0.555144
				1847.5	0.683029	0.553633
				1848.5	0.681716	0.552125
				1849.5	0.680404	0.550621
				1850.5	0.678956	0.549121
				1851.5	0.677193	0.547626
				1852.5	0.67543	0.546134
				1853.5	0.673895	0.544646
				1854.5	0.672702	0.543162
				1855.5	0.671509	0.541682
				1856.5	0.67008	0.540206
				1857.5	0.668413	0.538733
				1858.5	0.666746	0.537265
				1859.5	0.665381	0.5358
				1860.5	0.664217	0.53434
				1861.5	0.663053	0.532883
				1862.5	0.661206	0.53143
				1863.5	0.659065	0.529981
				1864.5	0.656925	0.528536
				1865.5	0.655895	0.527094
				1866.5	0.655143	0.525657
				1867.5	0.654391	0.524223
				1868.5	0.652957	0.522793
				1869.5	0.651448	0.521367
				1870.5	0.649938	0.519944
				1871.5	0.648988	0.518526
				1872.5	0.648038	0.517111
				1873.5	0.647041	0.515699
				1874.5	0.645617	0.514292
				1875.5	0.644194	0.512888
				1876.5	0.642839	0.511488
				1877.5	0.641757	0.510092
				1878.5	0.640676	0.508699
				1879.5	0.639577	0.50731
				1880.5	0.638438	0.505925
				1881.5	0.637299	0.504544
				1882.5	0.63588	0.503166
				1883.5	0.634042	0.501791
				1884.5	0.632205	0.500421
				1885.5	0.630711	0.499054
				1886.5	0.629562	0.497691
				1887.5	0.628413	0.496331
				1888.5	0.626953	0.494975
				1889.5	0.625287	0.493622
				1890.5	0.62362	0.492273
				1891.5	0.622488	0.490928
				1892.5	0.621586	0.489586
				1893.5	0.620683	0.488248
				1894.5	0.619244	0.486913
				1895.5	0.61767	0.485582
				1896.5	0.616096	0.484254
				1897.5	0.615023	0.48293
				1898.5	0.614006	0.48161
				1899.5	0.612988	0.480292
				1900.5	0.611746	0.478979
				1901.5	0.610503	0.477669
				1902.5	0.609271	0.476362
				1903.5	0.608134	0.475059
				1904.5	0.606998	0.473759
				1905.5	0.605857	0.472463
				1906.5	0.604701	0.47117
				1907.5	0.603545	0.469881
				1908.5	0.602371	0.468595
				1909.5	0.601153	0.467313
				1910.5	0.599936	0.466034
				1911.5	0.598836	0.464758
				1912.5	0.597913	0.463486
				1913.5	0.59699	0.462217
				1914.5	0.595875	0.460951
				1915.5	0.594567	0.459689
				1916.5	0.593258	0.45843
				1917.5	0.592908	0.457175
				1918.5	0.593197	0.455923
				1919.5	0.593485	0.454674
				1920.5	0.594052	0.453428
				1921.5	0.594738	0.452186
				1922.5	0.595424	0.450947
				1923.5	0.597532	0.449712
				1924.5	0.599996	0.448479
				1925.5	0.60246	0.447251
				1926.5	0.604694	0.446025
				1927.5	0.606902	0.444802
				1928.5	0.609111	0.443583
				1929.5	0.61197	0.442367
				1930.5	0.61483	0.441155
				1931.5	0.617669	0.439945
				1932.5	0.620331	0.438739
				1933.5	0.622993	0.437536
				1934.5	0.625695	0.436336
				1935.5	0.628561	0.435139
				1936.5	0.631426	0.433946
				1937.5	0.63419	0.432756
				1938.5	0.636715	0.431569
				1939.5	0.639241	0.430385
				1940.5	0.641383	0.429204
				1941.5	0.642951	0.428026
				1942.5	0.644519	0.426852
				1943.5	0.646393	0.425681
				1944.5	0.648572	0.424513
				1945.5	0.650752	0.423347
				1946.5	0.652304	0.422185
				1947.5	0.653436	0.421027
				1948.5	0.654569	0.419871
				1949.5	0.655735	0.418718
				1950.5	0.656916	0.417569
				1951.5	0.658097	0.416422
				1952.5	0.6586	0.415279
				1953.5	0.658934	0.414138
				1954.5	0.659268	0.413001
				1955.5	0.660052	0.411866
				1956.5	0.660886	0.410735
				1957.5	0.66172	0.409607
				1958.5	0.661691	0.408482
				1959.5	0.661663	0.407359
				1960.5	0.661606	0.40624
				1961.5	0.661292	0.405124
				1962.5	0.660979	0.404011
				1963.5	0.660623	0.4029
				1964.5	0.6601	0.401793
				1965.5	0.659577	0.400689
				1966.5	0.659079	0.399587
				1967.5	0.658641	0.398489
				1968.5	0.658202	0.397393
				1969.5	0.657809	0.396301
				1970.5	0.657483	0.395211
				1971.5	0.657158	0.394124
				1972.5	0.656483	0.39304
				1973.5	0.655459	0.391959
				1974.5	0.654436	0.390881
				1975.5	0.653815	0.389806
				1976.5	0.653462	0.388734
				1977.5	0.65311	0.387664
				1978.5	0.652227	0.386598
				1979.5	0.651116	0.385534
				1980.5	0.650006	0.384473
				1981.5	0.649341	0.383415
				1982.5	0.648787	0.38236
				1983.5	0.648232	0.381308
				1984.5	0.647148	0.380258
				1985.5	0.646004	0.379212
				1986.5	0.644861	0.378168
				1987.5	0.644247	0.377127
				1988.5	0.643633	0.376088
				1989.5	0.642966	0.375053
[truncated: 511 more rows]

## Sheet: CAL 250 mM DABCO 50 mM BuI DMSO
Calorimetry results using Seteram C80 Calvet calorimeter.
Data recorded by Katherine Koh and analyzed by Tom Autrey. Data recorded May 2021.
Starting DABCO concentration 0.250 M in DMSO. Starting butyl iodide concentration 0.05 M in DMSO.
Experiment set temperature 30.0 C.
Data analyzed using Berkeley Madonna numerical differential equation solver.
The fit enthalpy change is -122.7 kJ/mol and the fit kinetic rate is 0.067 M-1 sec-1.
The total number of points in this data sheet has been reduced by 1/16 from the				All experimental and fit data points are given below.
original to make the number of measured heat flow points on the plot less crowded.
TIME (sec)	MEAS. HEAT (mW)	FIT HEAT (mW)		TIME (sec)	MEAS. HEAT (mW)	FIT HEAT (mW)
50	0.0618927	0		50	0.0618927	0
63.5	0.831257	1.51492		50.1	0.0619004	1.27e-06
79.5	5.93498	7.249		50.3	0.0619158	3.391e-05
95.5	12.4321	13.5127		50.7	0.0619465	0.00042135
111.5	18.229	18.5329		51.5	0.0620078	0.00396605
127.5	22.4131	22.1301		52.5	0.0620846	0.0173732
143.5	25.1659	24.5401		53.5	0.0621613	0.0451154
159.5	26.7618	26.0358		54.5	0.076768	0.0907646
175.5	27.5254	26.8437		55.5	0.101061	0.156903
191.5	27.6479	27.1383		56.5	0.125354	0.245281
207.5	27.3639	27.0519		57.5	0.149648	0.356952
223.5	26.795	26.6845		58.5	0.173941	0.492397
239.5	26.0459	26.1123		59.5	0.278042	0.651626
255.5	25.1706	25.3935		60.5	0.416346	0.834274
271.5	24.2314	24.5729		61.5	0.554649	1.03967
287.5	23.2579	23.6846		62.5	0.692953	1.26691
303.5	22.2747	22.755		63.5	0.831257	1.51492
319.5	21.296	21.8044		64.5	1.06538	1.7825
335.5	20.3334	20.8482		65.5	1.32347	2.06833
351.5	19.3958	19.898		66.5	1.58155	2.37107
367.5	18.4873	18.9626		67.5	1.83963	2.68935
383.5	17.6118	18.0484		68.5	2.09771	3.02177
399.5	16.7684	17.1603		69.5	2.39865	3.36695
415.5	15.9602	16.3013		70.5	2.70435	3.72357
431.5	15.186	15.4737		71.5	3.01005	4.09029
447.5	14.4475	14.6789		72.5	3.31574	4.46588
463.5	13.7406	13.9173		73.5	3.62144	4.84911
479.5	13.0667	13.1893		74.5	4.00796	5.23883
495.5	12.4254	12.4946		75.5	4.39447	5.63397
511.5	11.8149	11.8325		76.5	4.78099	6.03349
527.5	11.2315	11.2024		77.5	5.1675	6.43642
543.5	10.6755	10.6034		78.5	5.55351	6.84187
559.5	10.1476	10.0343		79.5	5.93498	7.249
575.5	9.64593	9.49413		80.5	6.31644	7.65702
591.5	9.16919	8.98173		81.5	6.6979	8.06522
607.5	8.71459	8.49591		82.5	7.07937	8.47294
623.5	8.28398	8.03551		83.5	7.47048	8.87955
639.5	7.87314	7.59937		84.5	7.90021	9.2845
655.5	7.48273	7.18634		85.5	8.32993	9.68728
671.5	7.11127	6.79531		86.5	8.75965	10.0874
687.5	6.75939	6.42519		87.5	9.18937	10.4845
703.5	6.42419	6.07494		88.5	9.61045	10.8782
719.5	6.10601	5.74354		89.5	10.0114	11.268
735.5	5.80145	5.43003		90.5	10.4123	11.6538
751.5	5.51434	5.13347		91.5	10.8133	12.0352
767.5	5.241	4.85299		92.5	11.2142	12.412
783.5	4.98145	4.58773		93.5	11.6176	12.784
799.5	4.73362	4.33689		94.5	12.0249	13.1509
815.5	4.49858	4.0997		95.5	12.4321	13.5127
831.5	4.2752	3.87543		96.5	12.8393	13.8692
847.5	4.06336	3.66338		97.5	13.2466	14.2202
863.5	3.86142	3.4629		98.5	13.6396	14.5657
879.5	3.66945	3.27337		99.5	14.0184	14.9055
895.5	3.48686	3.09418		100.5	14.3971	15.2397
911.5	3.31357	2.92479		101.5	14.7759	15.5681
927.5	3.14895	2.76466		102.5	15.1547	15.8907
943.5	2.99277	2.61328		103.5	15.5151	16.2076
959.5	2.84409	2.47018		104.5	15.8631	16.5186
975.5	2.70314	2.3349		105.5	16.2111	16.8237
991.5	2.56832	2.20703		106.5	16.5591	17.1231
1007.5	2.44104	2.08616		107.5	16.9071	17.4166
1023.5	2.31939	1.9719		108.5	17.2418	17.7043
1039.5	2.20401	1.8639		109.5	17.5709	17.9862
1055.5	2.0948	1.76181		110.5	17.9	18.2624
1071.5	1.99006	1.66531		111.5	18.229	18.5329
1087.5	1.89075	1.5741		112.5	18.5581	18.7978
1103.5	1.79777	1.48787		113.5	18.8479	19.057
1119.5	1.70801	1.40637		114.5	19.1279	19.3107
1135.5	1.62323	1.32934		115.5	19.4079	19.5588
1151.5	1.54086	1.25652		116.5	19.6879	19.8015
1167.5	1.46509	1.18769		117.5	19.9678	20.0389
1183.5	1.39225	1.12263		118.5	20.2388	20.2709
1199.5	1.3227	1.06114		119.5	20.5087	20.4976
1215.5	1.25531	1.00301		120.5	20.7787	20.7191
1231.5	1.19325	0.948064		121.5	21.0486	20.9355
1247.5	1.13403	0.89613		122.5	21.3186	21.1469
1263.5	1.07764	0.847041		123.5	21.5377	21.3532
1279.5	1.02274	0.80064		124.5	21.7568	21.5546
1295.5	0.972318	0.756782		125.5	21.9759	21.7512
1311.5	0.923108	0.715325		126.5	22.195	21.943
1327.5	0.876809	0.67614		127.5	22.4131	22.1301
1343.5	0.832625	0.639101		128.5	22.6225	22.3125
1359.5	0.789807	0.604091		129.5	22.8319	22.4904
1375.5	0.749612	0.570999		130.5	23.0412	22.6638
1391.5	0.712489	0.539719		131.5	23.2506	22.8327
1407.5	0.676029	0.510153		132.5	23.4512	22.9973
1423.5	0.641392	0.482207		133.5	23.6168	23.1576
1439.5	0.608195	0.455792		134.5	23.7823	23.3137
1455.5	0.577889	0.430823		135.5	23.9478	23.4657
1471.5	0.547319	0.407223		136.5	24.1134	23.6136
1487.5	0.519065	0.384915		137.5	24.2758	23.7574
1503.5	0.491494	0.363829		138.5	24.431	23.8974
1519.5	0.46826	0.343898		139.5	24.5862	24.0334
1535.5	0.443659	0.32506		140.5	24.7414	24.1656
1551.5	0.421031	0.307253		141.5	24.8966	24.2941
1567.5	0.3986	0.290421		142.5	25.0401	24.4189
1583.5	0.379232	0.274512		143.5	25.1659	24.5401
1599.5	0.358598	0.259474		144.5	25.2917	24.6578
1615.5	0.339478	0.24526		145.5	25.4176	24.7719
1631.5	0.321731	0.231825		146.5	25.5434	24.8826
1647.5	0.304703	0.219125		147.5	25.6606	24.99
1663.5	0.288316	0.207121		148.5	25.769	25.094
1679.5	0.272662	0.195775		149.5	25.8774	25.1948
1695.5	0.258466	0.18505		150.5	25.9858	25.2924
1711.5	0.243767	0.174913		151.5	26.0942	25.3868
1727.5	0.229319	0.165332		152.5	26.1914	25.4782
1743.5	0.216382	0.156275		153.5	26.2811	25.5665
1759.5	0.20492	0.147714		154.5	26.3708	25.6519
1775.5	0.193082	0.139622		155.5	26.4605	25.7343
1791.5	0.181459	0.131973		156.5	26.5503	25.8139
1807.5	0.171402	0.124744		157.5	26.625	25.8906
1823.5	0.162739	0.11791		158.5	26.6934	25.9646
1839.5	0.153142	0.111451		159.5	26.7618	26.0358
1855.5	0.143647	0.105346		160.5	26.8302	26.1044
1871.5	0.134054	0.0995749		161.5	26.8986	26.1704
1887.5	0.126038	0.0941202		162.5	26.96	26.2338
1903.5	0.117683	0.0889642		163.5	27.0196	26.2946
1919.5	0.110771	0.0840907		164.5	27.0793	26.353
1935.5	0.104133	0.0794842		165.5	27.1389	26.409
1951.5	0.0985009	0.07513		166.5	27.1985	26.4625
1967.5	0.09152	0.0710144		167.5	27.2388	26.5137
1983.5	0.0853915	0.0671242		168.5	27.2769	26.5626
1999.5	0.0790516	0.0634471		169.5	27.315	26.6092
2015.5	0.0738001	0.0599714		170.5	27.3531	26.6536
2031.5	0.0677926	0.0566862		171.5	27.3912	26.6959
2047.5	0.0624451	0.0535809		172.5	27.4248	26.7359
2063.5	0.0571595	0.0506457		173.5	27.4583	26.7739
2079.5	0.05291	0.0478713		174.5	27.4919	26.8098
2095.5	0.0487622	0.0452489		175.5	27.5254	26.8437
2111.5	0.0440593	0.0427701		176.5	27.557	26.8756
2127.5	0.0387226	0.0404272		177.5	27.5707	26.9055
2143.5	0.0354535	0.0382125		178.5	27.5845	26.9335
2159.5	0.0323269	0.0361192		179.5	27.5982	26.9597
2175.5	0.0289616	0.0341406		180.5	27.612	26.984
2191.5	0.0251822	0.0322704		181.5	27.625	27.0064
2207.5	0.0225318	0.0305026		182.5	27.6351	27.0271
2223.5	0.01951	0.0288317		183.5	27.6451	27.046
2239.5	0.0163307	0.0272522		184.5	27.6552	27.0633
2255.5	0.012733	0.0257594		185.5	27.6653	27.0788
2271.5	0.0103861	0.0243482		186.5	27.671	27.0927
2287.5	0.00712137	0.0230144		187.5	27.6667	27.1049
2303.5	0.00499145	0.0217537		188.5	27.6623	27.1156
2319.5	0.00211953	0.020562		189.5	27.658	27.1247
2335.5	-0.00037643	0.0194356		190.5	27.6536	27.1323
2351.5	-0.00217282	0.0183709		191.5	27.6479	27.1383
2367.5	-0.00488996	0.0173646		192.5	27.64	27.1429
2383.5	-0.00732586	0.0164133		193.5	27.6321	27.146
2399.5	-0.0102107	0.0155142		194.5	27.6243	27.1477
2415.5	-0.0109176	0.0146643		195.5	27.6164	27.148
2431.5	-0.0139017	0.013861		196.5	27.6035	27.147
2447.5	-0.0152636	0.0131017		197.5	27.5855	27.1446
2463.5	-0.0175106	0.012384		198.5	27.5675	27.1409
2479.5	-0.0180988	0.0117056		199.5	27.5495	27.1358
2495.5	-0.0195299	0.0110643		200.5	27.5315	27.1295
				201.5	27.5106	27.122
				202.5	27.4878	27.1132
				203.5	27.4649	27.1033
				204.5	27.4421	27.0921
				205.5	27.4192	27.0798
				206.5	27.3924	27.0664
				207.5	27.3639	27.0519
				208.5	27.3353	27.0362
				209.5	27.3068	27.0195
				210.5	27.2783	27.0018
				211.5	27.2451	26.983
				212.5	27.2107	26.9632
				213.5	27.1764	26.9425
				214.5	27.1421	26.9207
				215.5	27.1077	26.898
				216.5	27.0714	26.8744
				217.5	27.0348	26.8499
				218.5	26.9982	26.8245
				219.5	26.9616	26.7981
				220.5	26.925	26.771
				221.5	26.8817	26.743
				222.5	26.8383	26.7141
				223.5	26.795	26.6845
				224.5	26.7517	26.654
				225.5	26.7083	26.6228
				226.5	26.6648	26.5908
				227.5	26.6212	26.5581
				228.5	26.5776	26.5246
				229.5	26.534	26.4904
				230.5	26.4893	26.4555
				231.5	26.4401	26.42
				232.5	26.391	26.3837
				233.5	26.3418	26.3468
				234.5	26.2927	26.3093
				235.5	26.2434	26.2711
				236.5	26.194	26.2323
				237.5	26.1446	26.1929
				238.5	26.0952	26.1529
				239.5	26.0459	26.1123
				240.5	25.9947	26.0711
				241.5	25.9409	26.0294
				242.5	25.8871	25.9872
				243.5	25.8333	25.9444
				244.5	25.7795	25.9011
				245.5	25.7257	25.8573
				246.5	25.6719	25.813
				247.5	25.618	25.7682
				248.5	25.5642	25.7229
				249.5	25.5103	25.6772
				250.5	25.4547	25.631
				251.5	25.3979	25.5843
				252.5	25.3411	25.5373
				253.5	25.2843	25.4898
				254.5	25.2276	25.4419
				255.5	25.1706	25.3935
				256.5	25.1136	25.3448
				257.5	25.0567	25.2957
				258.5	24.9997	25.2463
				259.5	24.9427	25.1964
				260.5	24.8843	25.1462
				261.5	24.8255	25.0957
				262.5	24.7667	25.0448
				263.5	24.708	24.9936
				264.5	24.6492	24.942
				265.5	24.5896	24.8902
				266.5	24.5299	24.838
				267.5	24.4702	24.7856
				268.5	24.4105	24.7328
				269.5	24.3507	24.6798
				270.5	24.2911	24.6265
				271.5	24.2314	24.5729
				272.5	24.1718	24.519
				273.5	24.1121	24.4649
				274.5	24.0523	24.4106
				275.5	23.9912	24.356
				276.5	23.9301	24.3012
				277.5	23.869	24.2461
				278.5	23.8079	24.1908
				279.5	23.7469	24.1354
				280.5	23.6864	24.0797
				281.5	23.6259	24.0238
				282.5	23.5654	23.9677
				283.5	23.505	23.9114
				284.5	23.444	23.855
				285.5	23.382	23.7983
				286.5	23.3199	23.7415
				287.5	23.2579	23.6846
				288.5	23.1959	23.6275
				289.5	23.1342	23.5702
				290.5	23.0732	23.5127
				291.5	23.0122	23.4552
				292.5	22.9512	23.3975
				293.5	22.8902	23.3396
				294.5	22.8288	23.2817
				295.5	22.7669	23.2236
				296.5	22.7051	23.1654
				297.5	22.6432	23.107
				298.5	22.5814	23.0486
				299.5	22.5199	22.9901
				300.5	22.4586	22.9315
				301.5	22.3973	22.8727
				302.5	22.336	22.8139
				303.5	22.2747	22.755
				304.5	22.2133	22.6961
				305.5	22.1518	22.637
				306.5	22.0904	22.5779
				307.5	22.0289	22.5187
				308.5	21.9674	22.4594
				309.5	21.9061	22.4001
				310.5	21.8449	22.3407
				311.5	21.7836	22.2813
				312.5	21.7224	22.2218
				313.5	21.6611	22.1623
				314.5	21.6002	22.1027
				315.5	21.5394	22.0431
				316.5	21.4786	21.9835
				317.5	21.4177	21.9238
				318.5	21.3569	21.8641
				319.5	21.296	21.8044
				320.5	21.235	21.7447
				321.5	21.1741	21.6849
				322.5	21.1132	21.6252
				323.5	21.0523	21.5654
				324.5	20.9921	21.5056
				325.5	20.9319	21.4458
				326.5	20.8717	21.386
				327.5	20.8115	21.3262
				328.5	20.7514	21.2664
				329.5	20.6913	21.2066
				330.5	20.6313	21.1468
				331.5	20.5713	21.0871
				332.5	20.5113	21.0273
				333.5	20.4516	20.9676
				334.5	20.3925	20.9079
				335.5	20.3334	20.8482
				336.5	20.2743	20.7885
				337.5	20.2153	20.7289
				338.5	20.1561	20.6693
				339.5	20.0968	20.6097
				340.5	20.0374	20.5501
				341.5	19.9781	20.4906
				342.5	19.9188	20.4311
				343.5	19.8601	20.3717
				344.5	19.8021	20.3123
				345.5	19.744	20.253
				346.5	19.686	20.1937
				347.5	19.628	20.1344
				348.5	19.57	20.0752
				349.5	19.5119	20.0161
				350.5	19.4539	19.957
				351.5	19.3958	19.898
				352.5	19.3378	19.839
				353.5	19.2804	19.7801
				354.5	19.2234	19.7212
				355.5	19.1664	19.6624
				356.5	19.1093	19.6037
				357.5	19.0523	19.5451
				358.5	18.9955	19.4865
				359.5	18.9387	19.428
				360.5	18.882	19.3695
				361.5	18.8252	19.3112
				362.5	18.7685	19.2529
				363.5	18.7122	19.1946
				364.5	18.656	19.1365
				365.5	18.5997	19.0784
				366.5	18.5435	19.0205
				367.5	18.4873	18.9626
				368.5	18.4321	18.9048
				369.5	18.3769	18.847
				370.5	18.3217	18.7894
				371.5	18.2665	18.7318
				372.5	18.2113	18.6744
				373.5	18.1562	18.617
				374.5	18.1012	18.5597
				375.5	18.0461	18.5025
				376.5	17.9911	18.4454
				377.5	17.9362	18.3884
				378.5	17.8821	18.3315
				379.5	17.8279	18.2747
				380.5	17.7738	18.218
				381.5	17.7196	18.1614
				382.5	17.6656	18.1048
				383.5	17.6118	18.0484
				384.5	17.558	17.9921
				385.5	17.5042	17.9359
				386.5	17.4504	17.8798
				387.5	17.397	17.8238
				388.5	17.3443	17.7679
				389.5	17.2916	17.7121
				390.5	17.2389	17.6564
				391.5	17.1862	17.6009
				392.5	17.1335	17.5454
				393.5	17.081	17.49
				394.5	17.0284	17.4348
				395.5	16.9758	17.3797
				396.5	16.9233	17.3246
				397.5	16.8714	17.2697
				398.5	16.8199	17.2149
				399.5	16.7684	17.1603
				400.5	16.717	17.1057
				401.5	16.6655	17.0512
				402.5	16.6143	16.9969
				403.5	16.5632	16.9427
				404.5	16.5121	16.8886
				405.5	16.461	16.8346
				406.5	16.4098	16.7807
				407.5	16.3597	16.727
				408.5	16.3098	16.6733
				409.5	16.2599	16.6198
				410.5	16.21	16.5664
				411.5	16.1601	16.5132
				412.5	16.1101	16.46
				413.5	16.0602	16.407
				414.5	16.0102	16.3541
				415.5	15.9602	16.3013
				416.5	15.9102	16.2486
				417.5	15.8613	16.1961
				418.5	15.8124	16.1437
				419.5	15.7636	16.0914
				420.5	15.7147	16.0392
				421.5	15.6659	15.9872
				422.5	15.6177	15.9353
				423.5	15.5695	15.8835
				424.5	15.5212	15.8318
				425.5	15.473	15.7803
				426.5	15.4249	15.7289
				427.5	15.3771	15.6776
				428.5	15.3292	15.6264
				429.5	15.2814	15.5754
				430.5	15.2336	15.5245
				431.5	15.186	15.4737
				432.5	15.1392	15.4231
				433.5	15.0924	15.3726
				434.5	15.0456	15.3222
				435.5	14.9987	15.2719
				436.5	14.952	15.2218
				437.5	14.9053	15.1718
				438.5	14.8587	15.1219
				439.5	14.812	15.0721
				440.5	14.7654	15.0225
				441.5	14.7194	14.973
				442.5	14.6741	14.9237
				443.5	14.6289	14.8745
				444.5	14.5836	14.8254
				445.5	14.5383	14.7764
				446.5	14.493	14.7276
				447.5	14.4475	14.6789
				448.5	14.402	14.6303
				449.5	14.3566	14.5818
				450.5	14.3111	14.5335
				451.5	14.2665	14.4853
				452.5	14.2223	14.4373
				453.5	14.1781	14.3894
				454.5	14.1339	14.3416
				455.5	14.0897	14.2939
				456.5	14.0456	14.2464
				457.5	14.0015	14.199
				458.5	13.9574	14.1517
				459.5	13.9133	14.1046
				460.5	13.8692	14.0576
				461.5	13.8262	14.0107
				462.5	13.7834	13.964
				463.5	13.7406	13.9173
				464.5	13.6978	13.8709
				465.5	13.655	13.8245
				466.5	13.6121	13.7783
				467.5	13.5692	13.7322
				468.5	13.5263	13.6862
				469.5	13.4834	13.6404
				470.5	13.4407	13.5947
				471.5	13.399	13.5492
				472.5	13.3573	13.5037
				473.5	13.3156	13.4584
				474.5	13.2739	13.4132
				475.5	13.2323	13.3682
				476.5	13.1909	13.3233
				477.5	13.1495	13.2785
				478.5	13.1081	13.2339
				479.5	13.0667	13.1893
				480.5	13.0256	13.1449
				481.5	12.9851	13.1007
				482.5	12.9446	13.0565
				483.5	12.904	13.0125
				484.5	12.8635	12.9687
				485.5	12.8232	12.9249
				486.5	12.7832	12.8813
				487.5	12.7432	12.8378
				488.5	12.7031	12.7945
				489.5	12.6631	12.7512
				490.5	12.6232	12.7081
				491.5	12.5836	12.6652
				492.5	12.5439	12.6223
				493.5	12.5042	12.5796
				494.5	12.4645	12.537
				495.5	12.4254	12.4946
				496.5	12.3867	12.4522
				497.5	12.348	12.41
				498.5	12.3092	12.368
				499.5	12.2705	12.326
				500.5	12.2319	12.2842
				501.5	12.1934	12.2425
				502.5	12.1549	12.2009
				503.5	12.1163	12.1595
				504.5	12.0778	12.1182
				505.5	12.04	12.077
				506.5	12.0025	12.0359
				507.5	11.965	11.995
				508.5	11.9274	11.9542
				509.5	11.8899	11.9135
				510.5	11.8524	11.873
				511.5	11.8149	11.8325
				512.5	11.7775	11.7922
				513.5	11.74	11.752
				514.5	11.7026	11.712
				515.5	11.666	11.672
				516.5	11.6295	11.6322
				517.5	11.5929	11.5925
				518.5	11.5564	11.553
				519.5	11.5199	11.5135
				520.5	11.4834	11.4742
				521.5	11.447	11.435
				522.5	11.4105	11.3959
				523.5	11.3741	11.357
				524.5	11.3378	11.3182
				525.5	11.3024	11.2795
				526.5	11.267	11.2409
				527.5	11.2315	11.2024
				528.5	11.1961	11.1641
				529.5	11.1607	11.1259
				530.5	11.1253	11.0878
				531.5	11.0899	11.0498
				532.5	11.0545	11.0119
				533.5	11.0191	10.9742
				534.5	10.9841	10.9366
				535.5	10.9497	10.8991
				536.5	10.9154	10.8617
				537.5	10.881	10.8244
				538.5	10.8466	10.7873
				539.5	10.8123	10.7503
				540.5	10.7781	10.7134
				541.5	10.7439	10.6766
				542.5	10.7097	10.6399
				543.5	10.6755	10.6034
				544.5	10.6417	10.5669
				545.5	10.6082	10.5306
				546.5	10.5748	10.4944
				547.5	10.5413	10.4583
				548.5	10.5078	10.4224
				549.5	10.4747	10.3865
				550.5	10.4417	10.3508
				551.5	10.4087	10.3151
				552.5	10.3758	10.2796
				553.5	10.3428	10.2442
				554.5	10.3101	10.209
				555.5	10.2774	10.1738
				556.5	10.2447	10.1388
				557.5	10.212	10.1038
				558.5	10.1793	10.069
				559.5	10.1476	10.0343
				560.5	10.1159	9.9997
				561.5	10.0842	9.96521
				562.5	10.0525	9.93084
				563.5	10.0208	9.89659
				564.5	9.98907	9.86244
				565.5	9.95734	9.8284
				566.5	9.92562	9.79448
				567.5	9.89389	9.76067
				568.5	9.86225	9.72697
				569.5	9.83136	9.69338
				570.5	9.80047	9.65989
				571.5	9.76959	9.62652
				572.5	9.7387	9.59326
				573.5	9.7078	9.56011
				574.5	9.67686	9.52706
				575.5	9.64593	9.49413
				576.5	9.61499	9.4613
				577.5	9.58405	9.42858
				578.5	9.55348	9.39597
				579.5	9.52374	9.36347
				580.5	9.494	9.33108
				581.5	9.46426	9.29879
				582.5	9.43452	9.26661
				583.5	9.40471	9.23453
				584.5	9.37479	9.20256
				585.5	9.34487	9.1707
				586.5	9.31495	9.13894
				587.5	9.28502	9.10729
				588.5	9.25565	9.07574
				589.5	9.22683	9.0443
				590.5	9.19801	9.01296
				591.5	9.16919	8.98173
				592.5	9.14037	8.95059
				593.5	9.1115	8.91957
				594.5	9.08259	8.88864
				595.5	9.05367	8.85782
				596.5	9.02476	8.82711
				597.5	8.99585	8.79649
				598.5	8.9675	8.76598
				599.5	8.93939	8.73557
				600.5	8.91128	8.70526
				601.5	8.88316	8.67505
				602.5	8.85505	8.64494
				603.5	8.82696	8.61494
				604.5	8.79886	8.58503
				605.5	8.77077	8.55522
				606.5	8.74268	8.52552
				607.5	8.71459	8.49591
				608.5	8.68717	8.4664
				609.5	8.65983	8.43699
				610.5	8.63249	8.40768
				611.5	8.60515	8.37847
				612.5	8.57781	8.34936
				613.5	8.55091	8.32034
				614.5	8.52402	8.29143
				615.5	8.49712	8.26261
				616.5	8.47022	8.23388
				617.5	8.44334	8.20526
				618.5	8.41663	8.17673
				619.5	8.38993	8.14829
				620.5	8.36322	8.11995
				621.5	8.33652	8.09171
				622.5	8.30996	8.06356
				623.5	8.28398	8.03551
				624.5	8.258	8.00756
				625.5	8.23203	7.97969
				626.5	8.20605	7.95192
				627.5	8.18	7.92425
				628.5	8.15378	7.89667
				629.5	8.12755	7.86918
				630.5	8.10133	7.84178
				631.5	8.0751	7.81448
				632.5	8.04933	7.78727
				633.5	8.02423	7.76015
				634.5	7.99913	7.73313
				635.5	7.97403	7.7062
				636.5	7.94893	7.67935
				637.5	7.92373	7.6526
				638.5	7.89843	7.62594
				639.5	7.87314	7.59937
				640.5	7.84784	7.57289
				641.5	7.82254	7.5465
				642.5	7.79773	7.5202
				643.5	7.77325	7.49399
				644.5	7.74876	7.46787
				645.5	7.72427	7.44184
				646.5	7.69979	7.41589
				647.5	7.67538	7.39004
				648.5	7.65101	7.36427
				649.5	7.62664	7.33859
				650.5	7.60227	7.313
				651.5	7.5779	7.28749
				652.5	7.55402	7.26208
				653.5	7.53025	7.23675
				654.5	7.50649	7.2115
				655.5	7.48273	7.18634
				656.5	7.45897	7.16127
				657.5	7.43534	7.13628
				658.5	7.41171	7.11138
				659.5	7.38809	7.08657
				660.5	7.36447	7.06183
				661.5	7.34085	7.03719
				662.5	7.31764	7.01262
				663.5	7.29443	6.98815
				664.5	7.27122	6.96375
				665.5	7.24801	6.93944
				666.5	7.22485	6.91521
				667.5	7.20212	6.89107
				668.5	7.1794	6.867
				669.5	7.15668	6.84302
				670.5	7.13395	6.81913
				671.5	7.11127	6.79531
				672.5	7.08875	6.77158
				673.5	7.06623	6.74792
				674.5	7.04372	6.72435
				675.5	7.0212	6.70086
				676.5	6.99887	6.67745
				677.5	6.97698	6.65412
				678.5	6.95509	6.63087
				679.5	6.93319	6.6077
				680.5	6.9113	6.58461
				681.5	6.88944	6.5616
				682.5	6.86761	6.53867
				683.5	6.84579	6.51582
				684.5	6.82396	6.49304
				685.5	6.80213	6.47035
				686.5	6.78061	6.44773
				687.5	6.75939	6.42519
				688.5	6.73818	6.40273
				689.5	6.71696	6.38034
				690.5	6.69574	6.35804
				691.5	6.67435	6.33581
				692.5	6.65285	6.31365
				693.5	6.63134	6.29157
				694.5	6.60984	6.26957
				695.5	6.58834	6.24765
				696.5	6.56762	6.22579
				697.5	6.54725	6.20402
				698.5	6.52687	6.18232
				699.5	6.5065	6.16069
				700.5	6.48612	6.13914
				701.5	6.46552	6.11767
				702.5	6.44485	6.09627
				703.5	6.42419	6.07494
				704.5	6.40352	6.05368
				705.5	6.38286	6.0325
				706.5	6.36284	6.01139
				707.5	6.34289	5.99036
				708.5	6.32294	5.9694
				709.5	6.30299	5.94851
				710.5	6.28304	5.92769
				711.5	6.26304	5.90694
				712.5	6.24303	5.88627
				713.5	6.22303	5.86567
				714.5	6.20303	5.84514
				715.5	6.1831	5.82467
				716.5	6.16383	5.80429
				717.5	6.14456	5.78397
				718.5	6.12529	5.76372
				719.5	6.10601	5.74354
				720.5	6.08671	5.72343
				721.5	6.0673	5.70339
				722.5	6.04788	5.68342
				723.5	6.02847	5.66352
				724.5	6.00905	5.64369
				725.5	5.98977	5.62393
				726.5	5.97081	5.60423
				727.5	5.95185	5.58461
				728.5	5.93289	5.56505
				729.5	5.91393	5.54556
				730.5	5.89506	5.52614
				731.5	5.8763	5.50678
				732.5	5.85754	5.48749
				733.5	5.83878	5.46827
				734.5	5.82002	5.44912
				735.5	5.80145	5.43003
				736.5	5.78308	5.41101
				737.5	5.7647	5.39205
				738.5	5.74632	5.37316
				739.5	5.72795	5.35433
				740.5	5.70988	5.33558
				741.5	5.69203	5.31688
				742.5	5.67417	5.29825
				743.5	5.65631	5.27969
				744.5	5.63846	5.26119
				745.5	5.62057	5.24275
				746.5	5.60267	5.22438
				747.5	5.58477	5.20607
				748.5	5.56687	5.18783
				749.5	5.54897	5.16965
				750.5	5.53159	5.15153
				751.5	5.51434	5.13347
				752.5	5.49709	5.11548
				753.5	5.47985	5.09755
				754.5	5.4626	5.07969
				755.5	5.44514	5.06188
				756.5	5.42767	5.04414
				757.5	5.4102	5.02646
				758.5	5.39272	5.00884
				759.5	5.37525	4.99128
				760.5	5.35854	4.97378
				761.5	5.34183	4.95634
				762.5	5.32512	4.93897
				763.5	5.30841	4.92165
				764.5	5.29168	4.9044
				765.5	5.27479	4.8872
				766.5	5.2579	4.87007
				767.5	5.241	4.85299
				768.5	5.22411	4.83598
				769.5	5.20734	4.81902
				770.5	5.19104	4.80212
				771.5	5.17474	4.78528
				772.5	5.15845	4.7685
				773.5	5.14215	4.75178
				774.5	5.12582	4.73512
				775.5	5.10944	4.71851
				776.5	5.09306	4.70196
				777.5	5.07667	4.68547
				778.5	5.06029	4.66904
				779.5	5.04418	4.65267
				780.5	5.0285	4.63635
				781.5	5.01282	4.62009
				782.5	4.99714	4.60388
				783.5	4.98145	4.58773
				784.5	4.96572	4.57164
				785.5	4.94992	4.55561
				786.5	4.93413	4.53963
				787.5	4.91834	4.5237
				788.5	4.90255	4.50783
				789.5	4.88696	4.49202
				790.5	4.87151	4.47626
				791.5	4.85605	4.46056
				792.5	4.8406	4.44491
				793.5	4.82515	4.42932
				794.5	4.80982	4.41378
				795.5	4.79454	4.39829
				796.5	4.77926	4.38286
				797.5	4.76398	4.36749
				798.5	4.7487	4.35216
				799.5	4.73362	4.33689
				800.5	4.7186	4.32168
				801.5	4.70358	4.30651
				802.5	4.68855	4.2914
				803.5	4.67353	4.27634
				804.5	4.65878	4.26134
				805.5	4.64407	4.24639
				806.5	4.62935	4.23149
				807.5	4.61464	4.21664
				808.5	4.59993	4.20184
				809.5	4.58523	4.1871
				810.5	4.57054	4.1724
				811.5	4.55585	4.15776
				812.5	4.54116	4.14317
				813.5	4.52654	4.12863
				814.5	4.51256	4.11414
				815.5	4.49858	4.0997
				816.5	4.4846	4.08531
				817.5	4.47062	4.07098
				818.5	4.45658	4.05669
				819.5	4.44229	4.04245
				820.5	4.428	4.02826
				821.5	4.41372	4.01412
				822.5	4.39943	4.00003
				823.5	4.38535	3.98599
				824.5	4.37176	3.972
				825.5	4.35816	3.95806
				826.5	4.34457	3.94417
				827.5	4.33098	3.93032
				828.5	4.31722	3.91653
				829.5	4.30321	3.90278
				830.5	4.28921	3.88908
				831.5	4.2752	3.87543
				832.5	4.2612	3.86183
				833.5	4.2476	3.84827
				834.5	4.23441	3.83476
				835.5	4.22123	3.8213
				836.5	4.20804	3.80788
				837.5	4.19485	3.79452
				838.5	4.18156	3.78119
				839.5	4.16819	3.76792
				840.5	4.15482	3.75469
				841.5	4.14146	3.74151
				842.5	4.12809	3.72837
				843.5	4.11504	3.71528
				844.5	4.10212	3.70224
				845.5	4.0892	3.68924
				846.5	4.07628	3.67629
				847.5	4.06336	3.66338
				848.5	4.05046	3.65052
				849.5	4.03757	3.6377
				850.5	4.02468	3.62493
				851.5	4.01179	3.6122
				852.5	3.9989	3.59952
				853.5	3.98627	3.58688
				854.5	3.97366	3.57429
				855.5	3.96105	3.56174
				856.5	3.94844	3.54923
				857.5	3.93583	3.53677
				858.5	3.92346	3.52435
				859.5	3.91108	3.51197
				860.5	3.89871	3.49964
				861.5	3.88634	3.48735
				862.5	3.87395	3.47511
				863.5	3.86142	3.4629
				864.5	3.84888	3.45074
				865.5	3.83635	3.43863
				866.5	3.82382	3.42655
				867.5	3.81141	3.41452
				868.5	3.79954	3.40253
				869.5	3.78767	3.39058
				870.5	3.7758	3.37867
				871.5	3.76393	3.36681
				872.5	3.75202	3.35498
				873.5	3.74004	3.3432
				874.5	3.72805	3.33146
				875.5	3.71606	3.31976
				876.5	3.70407	3.3081
				877.5	3.69231	3.29648
				878.5	3.68088	3.28491
				879.5	3.66945	3.27337
				880.5	3.65802	3.26187
				881.5	3.64659	3.25042
				882.5	3.63497	3.239
				883.5	3.62314	3.22762
				884.5	3.61131	3.21629
				885.5	3.59949	3.20499
				886.5	3.58766	3.19374
				887.5	3.57632	3.18252
				888.5	3.56529	3.17134
				889.5	3.55427	3.1602
				890.5	3.54325	3.1491
				891.5	3.53222	3.13804
				892.5	3.52096	3.12702
				893.5	3.5096	3.11604
				894.5	3.49823	3.10509
				895.5	3.48686	3.09418
				896.5	3.4755	3.08332
				897.5	3.46457	3.07249
				898.5	3.45376	3.06169
				899.5	3.44295	3.05094
				900.5	3.43213	3.04022
				901.5	3.42132	3.02954
				902.5	3.41023	3.0189
				903.5	3.39912	3.0083
				904.5	3.38801	2.99773
				905.5	3.3769	2.9872
				906.5	3.36578	2.97671
				907.5	3.35534	2.96625
				908.5	3.3449	2.95583
				909.5	3.33445	2.94545
				910.5	3.32401	2.9351
				911.5	3.31357	2.92479
				912.5	3.30314	2.91452
				913.5	3.2927	2.90428
				914.5	3.28227	2.89408
				915.5	3.27184	2.88391
				916.5	3.26144	2.87378
				917.5	3.25117	2.86368
				918.5	3.2409	2.85362
				919.5	3.23063	2.8436
				920.5	3.22036	2.83361
				921.5	3.21009	2.82365
				922.5	3.19985	2.81373
				923.5	3.18961	2.80385
				924.5	3.17936	2.794
				925.5	3.16912	2.78418
				926.5	3.15896	2.7744
				927.5	3.14895	2.76466
				928.5	3.13893	2.75494
				929.5	3.12891	2.74526
				930.5	3.11889	2.73562
				931.5	3.10901	2.72601
				932.5	3.09928	2.71643
				933.5	3.08954	2.70689
				934.5	3.07981	2.69738
				935.5	3.07007	2.6879
				936.5	3.06024	2.67846
				937.5	3.05035	2.66905
				938.5	3.04046	2.65967
				939.5	3.03057	2.65033
				940.5	3.02068	2.64101
				941.5	3.01125	2.63174
				942.5	3.00201	2.62249
				943.5	2.99277	2.61328
				944.5	2.98354	2.60409
				945.5	2.9743	2.59495
				946.5	2.96474	2.58583
				947.5	2.95508	2.57674
				948.5	2.94543	2.56769
				949.5	2.93578	2.55867
				950.5	2.92613	2.54968
				951.5	2.91703	2.54072
				952.5	2.90798	2.53179
				953.5	2.89894	2.5229
				954.5	2.8899	2.51403
				955.5	2.88085	2.5052
				956.5	2.87166	2.4964
				957.5	2.86247	2.48763
				958.5	2.85328	2.47889
				959.5	2.84409	2.47018
				960.5	2.83494	2.4615
				961.5	2.82609	2.45285
				962.5	2.81723	2.44423
				963.5	2.80838	2.43564
				964.5	2.79953	2.42708
				965.5	2.79067	2.41855
				966.5	2.78179	2.41006
				967.5	2.77291	2.40159
				968.5	2.76404	2.39315
				969.5	2.75516	2.38474
				970.5	2.74635	2.37636
				971.5	2.73771	2.36801
				972.5	2.72906	2.35969
				973.5	2.72042	2.3514
				974.5	2.71178	2.34314
				975.5	2.70314	2.3349
				976.5	2.69449	2.3267
				977.5	2.68584	2.31852
				978.5	2.6772	2.31038
				979.5	2.66855	2.30226
				980.5	2.66004	2.29417
				981.5	2.65166	2.28611
				982.5	2.64327	2.27807
				983.5	2.63489	2.27007
				984.5	2.62651	2.26209
				985.5	2.61819	2.25414
				986.5	2.60992	2.24622
				987.5	2.60164	2.23833
				988.5	2.59336	2.23046
				989.5	2.58508	2.22263
				990.5	2.57672	2.21482
				991.5	2.56832	2.20703
				992.5	2.55993	2.19928
				993.5	2.55153	2.19155
				994.5	2.54313	2.18385
				995.5	2.53523	2.17617
				996.5	2.52744	2.16853
				997.5	2.51966	2.16091
				998.5	2.51188	2.15331
				999.5	2.50409	2.14575
				1000.5	2.49607	2.13821
				1001.5	2.48803	2.13069
				1002.5	2.47998	2.12321
				1003.5	2.47194	2.11574
				1004.5	2.4639	2.10831
				1005.5	2.45628	2.1009
				1006.5	2.44866	2.09352
				1007.5	2.44104	2.08616
				1008.5	2.43342	2.07883
				1009.5	2.42578	2.07152
				1010.5	2.41793	2.06424
				1011.5	2.41007	2.05699
				1012.5	2.40222	2.04976
				1013.5	2.39437	2.04256
				1014.5	2.38662	2.03538
				1015.5	2.3793	2.02823
				1016.5	2.37197	2.0211
				1017.5	2.36465	2.014
				1018.5	2.35732	2.00692
				1019.5	2.34991	1.99987
				1020.5	2.34228	1.99284
				1021.5	2.33465	1.98584
				1022.5	2.32702	1.97886
				1023.5	2.31939	1.9719
				1024.5	2.31192	1.96497
				1025.5	2.30468	1.95807
				1026.5	2.29744	1.95119
				1027.5	2.2902	1.94433
				1028.5	2.28296	1.9375
				1029.5	2.27567	1.93069
				1030.5	2.26833	1.9239
				1031.5	2.26098	1.91714
				1032.5	2.25363	1.91041
				1033.5	2.24629	1.90369
				1034.5	2.23912	1.897
				1035.5	2.23208	1.89033
				1036.5	2.22504	1.88369
				1037.5	2.21799	1.87707
				1038.5	2.21095	1.87048
				1039.5	2.20401	1.8639
				1040.5	2.1971	1.85735
				1041.5	2.1902	1.85082
				1042.5	2.1833	1.84432
				1043.5	2.1764	1.83784
				1044.5	2.1695	1.83138
				1045.5	2.1626	1.82494
				1046.5	2.1557	1.81853
				1047.5	2.14879	1.81214
				1048.5	2.14189	1.80577
				1049.5	2.13517	1.79942
				1050.5	2.12847	1.7931
				1051.5	2.12177	1.7868
				1052.5	2.11507	1.78052
				1053.5	2.10837	1.77426
				1054.5	2.10158	1.76803
				1055.5	2.0948	1.76181
				1056.5	2.08802	1.75562
				1057.5	2.08124	1.74945
				1058.5	2.07448	1.7433
				1059.5	2.06791	1.73717
				1060.5	2.06133	1.73107
				1061.5	2.05476	1.72499
				1062.5	2.04818	1.71892
				1063.5	2.04159	1.71288
				1064.5	2.03489	1.70686
				1065.5	2.0282	1.70086
				1066.5	2.02151	1.69489
				1067.5	2.01481	1.68893
				1068.5	2.0083	1.68299
				1069.5	2.00222	1.67708
				1070.5	1.99614	1.67118
				1071.5	1.99006	1.66531
				1072.5	1.98398	1.65946
				1073.5	1.97776	1.65363
				1074.5	1.97133	1.64781
				1075.5	1.9649	1.64202
				1076.5	1.95847	1.63625
				1077.5	1.95204	1.6305
				1078.5	1.94587	1.62477
				1079.5	1.93996	1.61906
				1080.5	1.93406	1.61337
				1081.5	1.92815	1.6077
				1082.5	1.92224	1.60205
				1083.5	1.91608	1.59642
				1084.5	1.90975	1.59081
				1085.5	1.90341	1.58522
				1086.5	1.89708	1.57965
				1087.5	1.89075	1.5741
				1088.5	1.88477	1.56856
				1089.5	1.87893	1.56305
				1090.5	1.87309	1.55756
				1091.5	1.86726	1.55208
				1092.5	1.86142	1.54663
				1093.5	1.85548	1.54119
				1094.5	1.84951	1.53578
				1095.5	1.84355	1.53038
				1096.5	1.83758	1.525
				1097.5	1.83161	1.51964
				1098.5	1.82598	1.5143
				1099.5	1.82038	1.50898
				1100.5	1.81478	1.50367
				1101.5	1.80918	1.49839
				1102.5	1.80358	1.49312
				1103.5	1.79777	1.48787
				1104.5	1.79197	1.48264
				1105.5	1.78616	1.47743
				1106.5	1.78036	1.47224
				1107.5	1.77457	1.46707
				1108.5	1.76901	1.46191
				1109.5	1.76344	1.45677
				1110.5	1.75788	1.45165
				1111.5	1.75231	1.44655
				1112.5	1.74676	1.44147
				1113.5	1.74128	1.4364
				1114.5	1.7358	1.43135
				1115.5	1.73032	1.42632
				1116.5	1.72483	1.42131
				1117.5	1.7193	1.41631
				1118.5	1.71365	1.41133
				1119.5	1.70801	1.40637
				1120.5	1.70236	1.40143
				1121.5	1.69671	1.39651
				1122.5	1.69126	1.3916
				1123.5	1.68612	1.38671
				1124.5	1.68098	1.38183
				1125.5	1.67583	1.37698
				1126.5	1.67069	1.37214
				1127.5	1.66539	1.36731
				1128.5	1.65994	1.36251
				1129.5	1.65448	1.35772
				1130.5	1.64902	1.35295
				1131.5	1.64356	1.34819
				1132.5	1.63836	1.34345
				1133.5	1.63331	1.33873
				1134.5	1.62827	1.33403
				1135.5	1.62323	1.32934
				1136.5	1.61818	1.32467
				1137.5	1.61284	1.32001
				1138.5	1.60736	1.31537
				1139.5	1.60188	1.31075
				1140.5	1.5964	1.30614
				1141.5	1.59092	1.30155
				1142.5	1.586	1.29697
				1143.5	1.58122	1.29242
				1144.5	1.57644	1.28787
				1145.5	1.57165	1.28335
				1146.5	1.56687	1.27884
				1147.5	1.5617	1.27434
				1148.5	1.55649	1.26986
				1149.5	1.55128	1.2654
				1150.5	1.54607	1.26095
				1151.5	1.54086	1.25652
				1152.5	1.53621	1.2521
				1153.5	1.53157	1.2477
				1154.5	1.52693	1.24332
				1155.5	1.52229	1.23895
				1156.5	1.51762	1.23459
				1157.5	1.51265	1.23025
				1158.5	1.50768	1.22593
				1159.5	1.5027	1.22162
				1160.5	1.49773	1.21733
				1161.5	1.49283	1.21305
				1162.5	1.48823	1.20879
				1163.5	1.48362	1.20454
				1164.5	1.47901	1.2003
				1165.5	1.47441	1.19608
				1166.5	1.46978	1.19188
				1167.5	1.46509	1.18769
				1168.5	1.4604	1.18352
				1169.5	1.45571	1.17936
				1170.5	1.45102	1.17521
				1171.5	1.44641	1.17108
				1172.5	1.44193	1.16697
				1173.5	1.43744	1.16286
				1174.5	1.43296	1.15878
				1175.5	1.42847	1.1547
				1176.5	1.42399	1.15064
				1177.5	1.41952	1.1466
				1178.5	1.41504	1.14257
				1179.5	1.41056	1.13855
				1180.5	1.40609	1.13455
				1181.5	1.40152	1.13057
				1182.5	1.39689	1.12659
				1183.5	1.39225	1.12263
				1184.5	1.38762	1.11869
				1185.5	1.38299	1.11475
				1186.5	1.37865	1.11084
				1187.5	1.37445	1.10693
				1188.5	1.37025	1.10304
				1189.5	1.36604	1.09916
				1190.5	1.36184	1.0953
				1191.5	1.35734	1.09145
				1192.5	1.35277	1.08761
				1193.5	1.3482	1.08379
				1194.5	1.34363	1.07998
				1195.5	1.33906	1.07619
				1196.5	1.33494	1.0724
				1197.5	1.33086	1.06863
				1198.5	1.32678	1.06488
				1199.5	1.3227	1.06114
				1200.5	1.31862	1.05741
				1201.5	1.31427	1.05369
				1202.5	1.30992	1.04999
				1203.5	1.30557	1.0463
				1204.5	1.30121	1.04262
				1205.5	1.29689	1.03895
				1206.5	1.29283	1.0353
				1207.5	1.28877	1.03166
				1208.5	1.28471	1.02804
				1209.5	1.28066	1.02442
				1210.5	1.27655	1.02082
				1211.5	1.27227	1.01723
				1212.5	1.26798	1.01366
				1213.5	1.2637	1.0101
				1214.5	1.25941	1.00655
				1215.5	1.25531	1.00301
				1216.5	1.2516	0.999483
				1217.5	1.2479	0.99597
				1218.5	1.2442	0.992469
				1219.5	1.2405	0.988981
				1220.5	1.23658	0.985505
				1221.5	1.23233	0.982041
				1222.5	1.22809	0.978589
				1223.5	1.22384	0.975149
				1224.5	1.2196	0.971722
				1225.5	1.21563	0.968306
				1226.5	1.21193	0.964903
				1227.5	1.20823	0.961512
				1228.5	1.20453	0.958132
				1229.5	1.20083	0.954764
				1230.5	1.19706	0.951408
				1231.5	1.19325	0.948064
				1232.5	1.18944	0.944732
				1233.5	1.18562	0.941411
				1234.5	1.18181	0.938103
				1235.5	1.17812	0.934805
				1236.5	1.17448	0.93152
				1237.5	1.17084	0.928245
				1238.5	1.1672	0.924983
				1239.5	1.16356	0.921732
				1240.5	1.15989	0.918492
				1241.5	1.15621	0.915263
				1242.5	1.15253	0.912046
				1243.5	1.14885	0.908841
				1244.5	1.14517	0.905646
				1245.5	1.14146	0.902463
				1246.5	1.13774	0.899291
				1247.5	1.13403	0.89613
				1248.5	1.13031	0.89298
				1249.5	1.1266	0.889842
				1250.5	1.12306	0.886714
				1251.5	1.11953	0.883597
				1252.5	1.116	0.880492
				1253.5	1.11246	0.877397
				1254.5	1.10892	0.874313
				1255.5	1.10529	0.87124
				1256.5	1.10166	0.868178
				1257.5	1.09803	0.865126
				1258.5	1.0944	0.862085
				1259.5	1.09084	0.859055
				1260.5	1.08754	0.856036
				1261.5	1.08424	0.853027
				1262.5	1.08094	0.850029
				1263.5	1.07764	0.847041
				1264.5	1.07425	0.844064
				1265.5	1.07062	0.841097
				1266.5	1.06699	0.83814
				1267.5	1.06336	0.835194
				1268.5	1.05973	0.832259
				1269.5	1.05627	0.829334
				1270.5	1.05308	0.826419
				1271.5	1.04989	0.823514
				1272.5	1.04669	0.820619
				1273.5	1.0435	0.817735
				1274.5	1.04014	0.814861
				1275.5	1.0366	0.811997
				1276.5	1.03307	0.809142
				1277.5	1.02953	0.806298
				1278.5	1.026	0.803464
				1279.5	1.02274	0.80064
				1280.5	1.01965	0.797826
				1281.5	1.01657	0.795022
				1282.5	1.01349	0.792227
				1283.5	1.01041	0.789443
				1284.5	1.0071	0.786668
				1285.5	1.0037	0.783903
				1286.5	1.0003	0.781148
				1287.5	0.996892	0.778402
				1288.5	0.99349	0.775666
				1289.5	0.990457	0.77294
				1290.5	0.987518	0.770223
				1291.5	0.984579	0.767516
				1292.5	0.981639	0.764818
				1293.5	0.9787	0.76213
				1294.5	0.975522	0.759451
				1295.5	0.972318	0.756782
				1296.5	0.969114	0.754122
				1297.5	0.96591	0.751471
				1298.5	0.962706	0.74883
				1299.5	0.959697	0.746197
				1300.5	0.956688	0.743575
				1301.5	0.953679	0.740961
				1302.5	0.95067	0.738357
				1303.5	0.94765	0.735761
				1304.5	0.944533	0.733175
				1305.5	0.941415	0.730598
				1306.5	0.938298	0.72803
				1307.5	0.93518	0.725471
				1308.5	0.932087	0.722921
				1309.5	0.929094	0.72038
				1310.5	0.926101	0.717848
				1311.5	0.923108	0.715325
				1312.5	0.920115	0.712811
				1313.5	0.917192	0.710305
				1314.5	0.91443	0.707809
				1315.5	0.911669	0.705321
				1316.5	0.908907	0.702842
				1317.5	0.906146	0.700371
				1318.5	0.903188	0.69791
				1319.5	0.899935	0.695457
				1320.5	0.896682	0.693012
				1321.5	0.893429	0.690576
				1322.5	0.890176	0.688149
				1323.5	0.887245	0.68573
				1324.5	0.884636	0.68332
				1325.5	0.882027	0.680918
				1326.5	0.879418	0.678525
				1327.5	0.876809	0.67614
				1328.5	0.873966	0.673763
				1329.5	0.870968	0.671395
				1330.5	0.86797	0.669035
				1331.5	0.864972	0.666684
				1332.5	0.861974	0.66434
				1333.5	0.859368	0.662005
				1334.5	0.85693	0.659678
				1335.5	0.854491	0.65736
				1336.5	0.852053	0.655049
				1337.5	0.849615	0.652747
				1338.5	0.846797	0.650452
				1339.5	0.843884	0.648166
				1340.5	0.840972	0.645888
				1341.5	0.838059	0.643617
				1342.5	0.835146	0.641355
				1343.5	0.832625	0.639101
				1344.5	0.830148	0.636855
				1345.5	0.82767	0.634616
				1346.5	0.825193	0.632385
				1347.5	0.822715	0.630163
				1348.5	0.819833	0.627948
				1349.5	0.816951	0.625741
				1350.5	0.814069	0.623541
				1351.5	0.811187	0.621349
				1352.5	0.808335	0.619165
				1353.5	0.80575	0.616989
				1354.5	0.803165	0.61482
				1355.5	0.80058	0.612659
				1356.5	0.797996	0.610506
				1357.5	0.795372	0.60836
				1358.5	0.792589	0.606222
				1359.5	0.789807	0.604091
				1360.5	0.787025	0.601968
				1361.5	0.784243	0.599852
				1362.5	0.781539	0.597743
				1363.5	0.77902	0.595642
				1364.5	0.776501	0.593549
				1365.5	0.773982	0.591462
				1366.5	0.771463	0.589383
				1367.5	0.769028	0.587312
				1368.5	0.766719	0.585248
				1369.5	0.76441	0.58319
				1370.5	0.762101	0.581141
				1371.5	0.759792	0.579098
				1372.5	0.757348	0.577062
				1373.5	0.754769	0.575034
				1374.5	0.752191	0.573013
				1375.5	0.749612	0.570999
				1376.5	0.747033	0.568992
				1377.5	0.744661	0.566992
				1378.5	0.742426	0.564999
				1379.5	0.740192	0.563013
				1380.5	0.737957	0.561034
				1381.5	0.735722	0.559062
				1382.5	0.733308	0.557097
				1383.5	0.730818	0.555139
				1384.5	0.728327	0.553188
				1385.5	0.725836	0.551243
				1386.5	0.723345	0.549306
				1387.5	0.721121	0.547375
				1388.5	0.718963	0.545451
				1389.5	0.716805	0.543534
				1390.5	0.714647	0.541623
				1391.5	0.712489	0.539719
				1392.5	0.709916	0.537822
				1393.5	0.707297	0.535932
				1394.5	0.704679	0.534048
				1395.5	0.70206	0.532171
				1396.5	0.699441	0.530301
				1397.5	0.697656	0.528437
				1398.5	0.695871	0.526579
				1399.5	0.694086	0.524728
				1400.5	0.692301	0.522884
				1401.5	0.690444	0.521046
				1402.5	0.687944	0.519215
				1403.5	0.685443	0.51739
				1404.5	0.682943	0.515571
				1405.5	0.680442	0.513759
				1406.5	0.67804	0.511953
				1407.5	0.676029	0.510153
				1408.5	0.674019	0.50836
				1409.5	0.672008	0.506574
				1410.5	0.669997	0.504793
				1411.5	0.66785	0.503019
				1412.5	0.665384	0.501251
				1413.5	0.662917	0.499489
				1414.5	0.660451	0.497733
				1415.5	0.657985	0.495984
				1416.5	0.655717	0.49424
				1417.5	0.653748	0.492503
				1418.5	0.651779	0.490772
				1419.5	0.64981	0.489047
				1420.5	0.647841	0.487328
				1421.5	0.645764	0.485615
				1422.5	0.643578	0.483908
				1423.5	0.641392	0.482207
				1424.5	0.639206	0.480512
				1425.5	0.637019	0.478823
				1426.5	0.635023	0.47714
				1427.5	0.633153	0.475463
				1428.5	0.631282	0.473792
				1429.5	0.629412	0.472127
				1430.5	0.627542	0.470467
				1431.5	0.625531	0.468813
				1432.5	0.62346	0.467166
				1433.5	0.621388	0.465524
				1434.5	0.619317	0.463887
				1435.5	0.617245	0.462257
				1436.5	0.615013	0.460632
				1437.5	0.61274	0.459013
				1438.5	0.610468	0.457399
				1439.5	0.608195	0.455792
				1440.5	0.605922	0.45419
				1441.5	0.604082	0.452593
				1442.5	0.60229	0.451002
				1443.5	0.600498	0.449417
				1444.5	0.598706	0.447838
				1445.5	0.596914	0.446263
				1446.5	0.594834	0.444695
				1447.5	0.592754	0.443132
				1448.5	0.590674	0.441574
				1449.5	0.588594	0.440022
				1450.5	0.586551	0.438475
				1451.5	0.584838	0.436934
				1452.5	0.583125	0.435398
				1453.5	0.581412	0.433868
				1454.5	0.579698	0.432343
				1455.5	0.577889	0.430823
				1456.5	0.575696	0.429309
				1457.5	0.573503	0.4278
				1458.5	0.57131	0.426296
				1459.5	0.569116	0.424798
				1460.5	0.56711	0.423305
				1461.5	0.565539	0.421817
				1462.5	0.563969	0.420334
				1463.5	0.562399	0.418857
				1464.5	0.560828	0.417385
				1465.5	0.55905	0.415918
				1466.5	0.556961	0.414456
				1467.5	0.554871	0.412999
				1468.5	0.552781	0.411547
				1469.5	0.550692	0.410101
				1470.5	0.548871	0.408659
				1471.5	0.547319	0.407223
				1472.5	0.545767	0.405791
				1473.5	0.544215	0.404365
				1474.5	0.542663	0.402944
				1475.5	0.54083	0.401527
				1476.5	0.53881	0.400116
				1477.5	0.536789	0.39871
				1478.5	0.534769	0.397308
				1479.5	0.532749	0.395912
				1480.5	0.531023	0.39452
				1481.5	0.529424	0.393133
				1482.5	0.527824	0.391752
				1483.5	0.526225	0.390375
				1484.5	0.524625	0.389002
				1485.5	0.522808	0.387635
				1486.5	0.520936	0.386273
				1487.5	0.519065	0.384915
				1488.5	0.517194	0.383562
				1489.5	0.515322	0.382214
				1490.5	0.513685	0.38087
				1491.5	0.512075	0.379532
				1492.5	0.510464	0.378198
				1493.5	0.508854	0.376868
				1494.5	0.507243	0.375544
				1495.5	0.505646	0.374224
				1496.5	0.504049	0.372908
				1497.5	0.502452	0.371597
				1498.5	0.500854	0.370291
				1499.5	0.499224	0.36899
				1500.5	0.497291	0.367693
				1501.5	0.495359	0.3664
				1502.5	0.493426	0.365113
				1503.5	0.491494	0.363829
				1504.5	0.489666	0.36255
				1505.5	0.488255	0.361276
				1506.5	0.486845	0.360006
				1507.5	0.485434	0.358741
				1508.5	0.484023	0.35748
				1509.5	0.482528	0.356223
				1510.5	0.480834	0.354971
				1511.5	0.479141	0.353723
				1512.5	0.477448	0.35248
				1513.5	0.475754	0.351241
				1514.5	0.474281	0.350007
				1515.5	0.473137	0.348776
				1516.5	0.471994	0.34755
				1517.5	0.47085	0.346329
				1518.5	0.469707	0.345112
				1519.5	0.46826	0.343898
				1520.5	0.466509	0.34269
				1521.5	0.464758	0.341485
				1522.5	0.463007	0.340285
				1523.5	0.461256	0.339089
				1524.5	0.459865	0.337897
				1525.5	0.458712	0.336709
				1526.5	0.45756	0.335526
				1527.5	0.456408	0.334346
				1528.5	0.455256	0.333171
				1529.5	0.453616	0.332
				1530.5	0.451768	0.330833
				1531.5	0.44992	0.32967
				1532.5	0.448072	0.328512
				1533.5	0.446224	0.327357
				1534.5	0.444879	0.326206
				1535.5	0.443659	0.32506
				1536.5	0.44244	0.323917
				1537.5	0.441221	0.322779
				1538.5	0.440002	0.321644
				1539.5	0.438406	0.320513
				1540.5	0.436769	0.319387
				1541.5	0.435132	0.318264
				1542.5	0.433494	0.317146
				1543.5	0.431857	0.316031
				1544.5	0.430601	0.31492
				1545.5	0.429345	0.313813
				1546.5	0.428089	0.31271
				1547.5	0.426833	0.311611
				1548.5	0.425552	0.310516
				1549.5	0.424045	0.309424
				1550.5	0.422538	0.308337
				1551.5	0.421031	0.307253
				1552.5	0.419525	0.306173
				1553.5	0.418074	0.305097
				1554.5	0.416847	0.304024
				1555.5	0.415621	0.302956
				1556.5	0.414394	0.301891
				1557.5	0.413168	0.30083
				1558.5	0.41186	0.299772
				1559.5	0.410363	0.298718
				1560.5	0.408866	0.297669
				1561.5	0.407368	0.296622
				1562.5	0.405871	0.29558
				1563.5	0.404394	0.294541
				1564.5	0.402945	0.293505
				1565.5	0.401497	0.292474
				1566.5	0.400049	0.291446
				1567.5	0.3986	0.290421
				1568.5	0.397281	0.289401
				1569.5	0.396091	0.288383
				1570.5	0.394902	0.28737
				1571.5	0.393712	0.28636
				1572.5	0.392522	0.285353
				1573.5	0.391159	0.28435
				1574.5	0.38968	0.283351
				1575.5	0.388201	0.282355
				1576.5	0.386722	0.281362
				1577.5	0.385243	0.280373
				1578.5	0.384181	0.279388
				1579.5	0.383298	0.278406
				1580.5	0.382416	0.277427
				1581.5	0.381533	0.276452
				1582.5	0.380651	0.27548
				1583.5	0.379232	0.274512
				1584.5	0.37768	0.273547
				1585.5	0.376128	0.272586
				1586.5	0.374576	0.271627
				1587.5	0.373024	0.270673
				1588.5	0.37197	0.269721
				1589.5	0.370972	0.268773
				1590.5	0.369973	0.267828
				1591.5	0.368975	0.266887
				1592.5	0.367976	0.265949
				1593.5	0.366429	0.265014
				1594.5	0.364882	0.264083
				1595.5	0.363335	0.263154
				1596.5	0.361787	0.26223
				1597.5	0.360309	0.261308
				1598.5	0.359453	0.260389
				1599.5	0.358598	0.259474
				1600.5	0.357742	0.258562
				1601.5	0.356886	0.257653
				1602.5	0.355895	0.256748
				1603.5	0.354368	0.255845
				1604.5	0.35284	0.254946
				1605.5	0.351313	0.25405
				1606.5	0.349785	0.253157
				1607.5	0.348433	0.252267
				1608.5	0.347489	0.25138
				1609.5	0.346546	0.250497
				1610.5	0.345602	0.249616
				1611.5	0.344658	0.248739
				1612.5	0.343549	0.247864
				1613.5	0.342192	0.246993
				1614.5	0.340835	0.246125
				1615.5	0.339478	0.24526
				1616.5	0.338121	0.244398
				1617.5	0.336907	0.243539
				1618.5	0.335834	0.242683
				1619.5	0.334761	0.24183
				1620.5	0.333688	0.24098
				1621.5	0.332615	0.240133
				1622.5	0.331525	0.239289
				1623.5	0.330424	0.238448
				1624.5	0.329323	0.23761
				1625.5	0.328222	0.236774
				1626.5	0.327121	0.235942
				1627.5	0.326037	0.235113
				1628.5	0.324961	0.234286
				1629.5	0.323884	0.233463
				1630.5	0.322808	0.232642
				1631.5	0.321731	0.231825
				1632.5	0.320719	0.23101
				1633.5	0.319723	0.230198
				1634.5	0.318727	0.229389
				1635.5	0.317731	0.228582
				1636.5	0.316735	0.227779
				1637.5	0.315469	0.226978
				1638.5	0.314173	0.22618
				1639.5	0.312877	0.225385
				1640.5	0.311581	0.224593
				1641.5	0.310285	0.223804
				1642.5	0.309434	0.223017
				1643.5	0.308583	0.222233
				1644.5	0.307732	0.221452
				1645.5	0.306881	0.220674
				1646.5	0.305987	0.219898
				1647.5	0.304703	0.219125
				1648.5	0.303419	0.218355
				1649.5	0.302135	0.217587
				1650.5	0.300851	0.216823
				1651.5	0.299674	0.21606
				1652.5	0.298923	0.215301
				1653.5	0.298172	0.214544
				1654.5	0.297421	0.21379
				1655.5	0.29667	0.213039
				1656.5	0.29578	0.21229
				1657.5	0.294565	0.211544
				1658.5	0.293351	0.2108
				1659.5	0.292137	0.210059
				1660.5	0.290923	0.209321
				1661.5	0.289881	0.208585
				1662.5	0.289098	0.207852
				1663.5	0.288316	0.207121
				1664.5	0.287533	0.206393
				1665.5	0.28675	0.205668
				1666.5	0.28579	0.204945
				1667.5	0.284653	0.204225
				1668.5	0.283515	0.203507
				1669.5	0.282378	0.202791
				1670.5	0.28124	0.202079
				1671.5	0.280303	0.201368
				1672.5	0.279499	0.200661
				1673.5	0.278696	0.199955
				1674.5	0.277893	0.199252
				1675.5	0.277089	0.198552
				1676.5	0.276056	0.197854
				1677.5	0.274925	0.197159
				1678.5	0.273793	0.196466
				1679.5	0.272662	0.195775
				1680.5	0.27153	0.195087
				1681.5	0.270767	0.194401
				1682.5	0.270095	0.193718
				1683.5	0.269423	0.193037
				1684.5	0.268752	0.192359
				1685.5	0.26808	0.191682
				1686.5	0.267073	0.191009
				1687.5	0.266028	0.190337
				1688.5	0.264983	0.189668
				1689.5	0.263938	0.189002
				1690.5	0.262893	0.188337
				1691.5	0.262009	0.187675
				1692.5	0.261125	0.187016
				1693.5	0.260241	0.186358
				1694.5	0.259357	0.185703
				1695.5	0.258466	0.18505
				1696.5	0.257508	0.1844
				1697.5	0.256549	0.183752
				1698.5	0.255591	0.183106
				1699.5	0.254633	0.182462
				1700.5	0.253648	0.181821
				1701.5	0.252561	0.181182
				1702.5	0.251473	0.180545
				1703.5	0.250386	0.179911
				1704.5	0.249298	0.179278
				1705.5	0.24833	0.178648
				1706.5	0.247642	0.17802
				1707.5	0.246953	0.177394
				1708.5	0.246264	0.176771
				1709.5	0.245575	0.176149
				1710.5	0.244764	0.17553
				1711.5	0.243767	0.174913
				1712.5	0.242771	0.174299
				1713.5	0.241775	0.173686
				1714.5	0.240779	0.173075
				1715.5	0.239948	0.172467
				1716.5	0.239281	0.171861
				1717.5	0.238614	0.171257
				1718.5	0.237947	0.170655
				1719.5	0.23728	0.170055
				1720.5	0.236268	0.169457
				1721.5	0.235027	0.168862
				1722.5	0.233786	0.168268
				1723.5	0.232545	0.167677
				1724.5	0.231304	0.167087
				1725.5	0.230514	0.1665
				1726.5	0.229916	0.165915
				1727.5	0.229319	0.165332
				1728.5	0.228721	0.16475
				1729.5	0.228124	0.164171
				1730.5	0.227198	0.163594
				1731.5	0.226192	0.163019
				1732.5	0.225185	0.162446
				1733.5	0.224178	0.161875
				1734.5	0.223171	0.161306
				1735.5	0.222541	0.160739
				1736.5	0.221953	0.160174
				1737.5	0.221366	0.159611
				1738.5	0.220778	0.15905
				1739.5	0.22019	0.158491
				1740.5	0.219238	0.157934
				1741.5	0.218286	0.157379
				1742.5	0.217334	0.156826
				1743.5	0.216382	0.156275
				1744.5	0.215462	0.155725
				1745.5	0.21483	0.155178
				1746.5	0.214199	0.154632
				1747.5	0.213567	0.154089
				1748.5	0.212935	0.153547
				1749.5	0.212259	0.153008
				1750.5	0.211401	0.15247
				1751.5	0.210544	0.151934
				1752.5	0.209687	0.1514
				1753.5	0.20883	0.150868
				1754.5	0.208047	0.150337
				1755.5	0.207438	0.149809
				1756.5	0.206828	0.149282
				1757.5	0.206218	0.148758
				1758.5	0.205609	0.148235
				1759.5	0.20492	0.147714
				1760.5	0.204112	0.147195
				1761.5	0.203303	0.146677
				1762.5	0.202495	0.146162
				1763.5	0.201687	0.145648
				1764.5	0.200895	0.145136
				1765.5	0.200118	0.144626
				1766.5	0.199341	0.144117
				1767.5	0.198564	0.143611
				1768.5	0.197788	0.143106
				1769.5	0.197138	0.142603
				1770.5	0.196574	0.142102
				1771.5	0.196009	0.141602
				1772.5	0.195445	0.141105
				1773.5	0.19488	0.140609
				1774.5	0.19404	0.140114
				1775.5	0.193082	0.139622
				1776.5	0.192124	0.139131
				1777.5	0.191166	0.138642
				1778.5	0.190208	0.138155
				1779.5	0.189687	0.137669
				1780.5	0.189276	0.137185
				1781.5	0.188865	0.136703
				1782.5	0.188454	0.136223
				1783.5	0.188043	0.135744
				1784.5	0.187054	0.135267
				1785.5	0.186001	0.134791
				1786.5	0.184948	0.134317
				1787.5	0.183894	0.133845
				1788.5	0.182841	0.133375
				1789.5	0.18238	0.132906
				1790.5	0.181919	0.132439
				1791.5	0.181459	0.131973
				1792.5	0.180998	0.13151
				1793.5	0.180496	0.131047
				1794.5	0.179627	0.130587
				1795.5	0.178757	0.130128
				1796.5	0.177888	0.12967
				1797.5	0.177019	0.129215
				1798.5	0.17625	0.12876
				1799.5	0.175887	0.128308
				1800.5	0.175524	0.127857
				1801.5	0.175161	0.127407
				1802.5	0.174797	0.12696
				1803.5	0.174324	0.126513
				1804.5	0.173593	0.126069
				1805.5	0.172863	0.125625
				1806.5	0.172133	0.125184
				1807.5	0.171402	0.124744
				1808.5	0.170771	0.124305
				1809.5	0.170288	0.123868
				1810.5	0.169806	0.123433
				1811.5	0.169323	0.122999
				1812.5	0.16884	0.122567
				1813.5	0.168258	0.122136
				1814.5	0.167577	0.121707
				1815.5	0.166895	0.121279
				1816.5	0.166213	0.120853
				1817.5	0.165532	0.120428
				1818.5	0.164998	0.120005
				1819.5	0.164563	0.119583
				1820.5	0.164127	0.119162
				1821.5	0.163692	0.118744
				1822.5	0.163257	0.118326
				1823.5	0.162739	0.11791
				1824.5	0.162187	0.117496
				1825.5	0.161635	0.117083
				1826.5	0.161083	0.116671
				1827.5	0.16053	0.116261
				1828.5	0.159896	0.115853
				1829.5	0.159242	0.115445
				1830.5	0.158587	0.11504
				1831.5	0.157932	0.114635
				1832.5	0.157277	0.114232
				1833.5	0.156724	0.113831
				1834.5	0.156181	0.113431
				1835.5	0.155639	0.113032
				1836.5	0.155096	0.112635
				1837.5	0.154554	0.112239
				1838.5	0.153848	0.111844
				1839.5	0.153142	0.111451
				1840.5	0.152436	0.111059
				1841.5	0.15173	0.110669
				1842.5	0.151053	0.11028
				1843.5	0.150628	0.109892
				1844.5	0.150204	0.109506
				1845.5	0.14978	0.109121
				1846.5	0.149355	0.108738
				1847.5	0.148855	0.108355
				1848.5	0.148049	0.107975
				1849.5	0.147243	0.107595
				1850.5	0.146437	0.107217
				1851.5	0.145631	0.10684
				1852.5	0.144938	0.106465
				1853.5	0.144507	0.10609
				1854.5	0.144077	0.105717
				1855.5	0.143647	0.105346
				1856.5	0.143216	0.104976
				1857.5	0.142635	0.104607
				1858.5	0.141826	0.104239
				1859.5	0.141018	0.103872
				1860.5	0.14021	0.103507
				1861.5	0.139401	0.103144
				1862.5	0.138814	0.102781
				1863.5	0.138448	0.10242
				1864.5	0.138083	0.10206
				1865.5	0.137717	0.101701
				1866.5	0.137351	0.101344
				1867.5	0.136794	0.100987
				1868.5	0.136109	0.100632
				1869.5	0.135424	0.100279
				1870.5	0.134739	0.0999262
				1871.5	0.134054	0.0995749
				1872.5	0.133559	0.0992249
				1873.5	0.133145	0.0988762
				1874.5	0.132732	0.0985286
				1875.5	0.132319	0.0981823
				1876.5	0.131906	0.0978372
				1877.5	0.131363	0.0974933
				1878.5	0.130787	0.0971506
				1879.5	0.130212	0.0968091
				1880.5	0.129636	0.0964689
				1881.5	0.129061	0.0961298
				1882.5	0.128559	0.0957919
				1883.5	0.128065	0.0954552
				1884.5	0.127571	0.0951197
				1885.5	0.127077	0.0947853
				1886.5	0.126583	0.0944522
				1887.5	0.126038	0.0941202
				1888.5	0.125493	0.0937893
				1889.5	0.124948	0.0934597
				1890.5	0.124403	0.0931312
				1891.5	0.123867	0.0928038
				1892.5	0.123403	0.0924776
				1893.5	0.12294	0.0921526
				1894.5	0.122477	0.0918287
				1895.5	0.122014	0.0915059
				1896.5	0.121533	0.0911843
				1897.5	0.12098	0.0908637
				1898.5	0.120428	0.0905444
				1899.5	0.119876	0.0902261
				1900.5	0.119324	0.089909
				1901.5	0.118773	0.089593
				1902.5	0.118228	0.089278
				1903.5	0.117683	0.0889642
				1904.5	0.117138	0.0886515
				1905.5	0.116593	0.0883399
				1906.5	0.116129	0.0880294
				1907.5	0.115787	0.08772
				1908.5	0.115444	0.0874117
				1909.5	0.115102	0.0871044
				1910.5	0.114759	0.0867982
				1911.5	0.114241	0.0864932
				1912.5	0.113547	0.0861892
				1913.5	0.112853	0.0858862
				1914.5	0.112159	0.0855843
				1915.5	0.111466	0.0852835
				1916.5	0.111119	0.0849837
				1917.5	0.111003	0.084685
				1918.5	0.110887	0.0843873
				1919.5	0.110771	0.0840907
				1920.5	0.110656	0.0837952
				1921.5	0.110083	0.0835006
				1922.5	0.109315	0.0832071
				1923.5	0.108547	0.0829147
				1924.5	0.107779	0.0826232
				1925.5	0.107011	0.0823328
				1926.5	0.106891	0.0820434
				1927.5	0.106934	0.081755
				1928.5	0.106976	0.0814677
				1929.5	0.107019	0.0811813
				1930.5	0.107062	0.080896
				1931.5	0.106527	0.0806116
				1932.5	0.105929	0.0803283
				1933.5	0.10533	0.0800459
				1934.5	0.104732	0.0797646
				1935.5	0.104133	0.0794842
				1936.5	0.103976	0.0792048
				1937.5	0.103818	0.0789264
				1938.5	0.103661	0.078649
				1939.5	0.103504	0.0783726
				1940.5	0.103298	0.0780971
				1941.5	0.102654	0.0778226
				1942.5	0.10201	0.077549
				1943.5	0.101367	0.0772765
				1944.5	0.100723	0.0770048
				1945.5	0.100168	0.0767342
				1946.5	0.0999665	0.0764645
				1947.5	0.0997653	0.0761957
				1948.5	0.0995641	0.0759279
				1949.5	0.0993629	0.075661
				1950.5	0.0990556	0.075395
				1951.5	0.0985009	0.07513
				1952.5	0.0979462	0.074866
				1953.5	0.0973915	0.0746028
				1954.5	0.0968368	0.0743406
				1955.5	0.0963577	0.0740793
				1956.5	0.095992	0.0738189
				1957.5	0.0956263	0.0735594
				1958.5	0.0952606	0.0733009
				1959.5	0.0948949	0.0730432
				1960.5	0.0945322	0.0727865
				1961.5	0.0941726	0.0725306
				1962.5	0.093813	0.0722757
				1963.5	0.0934534	0.0720217
				1964.5	0.0930938	0.0717685
				1965.5	0.09262	0.0715162
				1966.5	0.09207	0.0712649
				1967.5	0.09152	0.0710144
				1968.5	0.09097	0.0707648
				1969.5	0.09042	0.070516
				1970.5	0.0900477	0.0702682
				1971.5	0.0897516	0.0700212
				1972.5	0.0894555	0.0697751
				1973.5	0.0891593	0.0695298
				1974.5	0.0888632	0.0692854
				1975.5	0.0883904	0.0690419
				1976.5	0.0878735	0.0687992
				1977.5	0.0873566	0.0685574
				1978.5	0.0868396	0.0683164
				1979.5	0.0863227	0.0680763
				1980.5	0.086068	0.067837
				1981.5	0.0858425	0.0675985
				1982.5	0.085617	0.0673609
				1983.5	0.0853915	0.0671242
				1984.5	0.085166	0.0668882
				1985.5	0.0845709	0.0666531
				1986.5	0.0839758	0.0664189
				1987.5	0.0833807	0.0661854
				1988.5	0.0827856	0.0659528
				1989.5	0.0822385	0.0657209
				1990.5	0.0821241	0.0654899
				1991.5	0.0820096	0.0652597
				1992.5	0.0818951	0.0650304
				1993.5	0.0817806	0.0648018
				1994.5	0.0815841	0.064574
				1995.5	0.0810599	0.064347
				1996.5	0.0805356	0.0641208
				1997.5	0.0800113	0.0638955
				1998.5	0.079487	0.0636709
				1999.5	0.0790516	0.0634471
				2000.5	0.0788236	0.0632241
				2001.5	0.0785957	0.0630018
				2002.5	0.0783677	0.0627804
				2003.5	0.0781398	0.0625597
				2004.5	0.0777899	0.0623398
				2005.5	0.077257	0.0621207
				2006.5	0.0767241	0.0619024
				2007.5	0.0761913	0.0616848
				2008.5	0.0756584	0.061468
				2009.5	0.0753036	0.0612519
				2010.5	0.0751269	0.0610366
				2011.5	0.0749502	0.0608221
				2012.5	0.0747734	0.0606083
				2013.5	0.0745967	0.0603952
				2014.5	0.0742538	0.060183
				2015.5	0.0738001	0.0599714
				2016.5	0.0733464	0.0597606
				2017.5	0.0728928	0.0595506
				2018.5	0.0724391	0.0593413
				2019.5	0.0721324	0.0591327
				2020.5	0.0718888	0.0589248
				2021.5	0.0716451	0.0587177
				2022.5	0.0714014	0.0585113
				2023.5	0.0711577	0.0583057
				2024.5	0.0707315	0.0581007
				2025.5	0.0702597	0.0578965
				2026.5	0.0697879	0.057693
				2027.5	0.069316	0.0574902
				2028.5	0.0688442	0.0572881
				2029.5	0.0684853	0.0570868
				2030.5	0.068139	0.0568861
				2031.5	0.0677926	0.0566862
				2032.5	0.0674463	0.0564869
				2033.5	0.0671	0.0562884
				2034.5	0.0668196	0.0560905
				2035.5	0.0665392	0.0558934
				2036.5	0.0662588	0.0556969
				2037.5	0.0659784	0.0555011
[truncated: 463 more rows]
