# Supplementary material for: An experimental, computational, and uncertainty analysis study of the rates of iodoalkane trapping by DABCO in solution phase organic media
Source: Royal Society of Chemistry journal article supplement (doi:10.1039/d2cp05286e), 2023-01-01
Supplement: d2cp05286e5.xlsx [file d2cp05286e5.xlsx]

## Sheet: DABCO_1.5BuI_AcN_29.6C
Measured and fit concentrations (molar) vs. time (seconds) for the reaction 1 DABCO + 1.5 BuI ® Bu-DABCO-I in acetonitrile-d3 at 30 C.
The fit of the data was performed using a kinetic model of the reaction with the Berkeley-Madonna program.
									Berkeley-Madonna Model
TIME_MEAS	DABCO_MEAS	BuI_MEAS	BuDABCOI_MEAS	TIME_FIT	DABCO_FIT	BuI_FIT	BuDABCOI_FIT		METHOD STIFF
0	0.0353		0	0	0.042	0.0713695	0
1	0.0354		0.00075	1e-06	0.042	0.0713695	0		STARTTIME = 0
85.36	0.0326	0.0638	0.00375	3e-06	0.042	0.0713695	0		STOPTIME = 9000
169.72	0.0304	0.0608	0.006	7e-06	0.042	0.0713695	0		DT = 0.02
254.07	0.0285	0.0585	0.0075	1.5e-05	0.042	0.0713695	0
338.43	0.027	0.0578	0.0105	3.1e-05	0.042	0.0713695	0		{RXN1: DABCO + 1.5 BuI --> BuDABCOI + 0.5 BuI}
422.79	0.0249	0.0555	0.0128	6.3e-05	0.042	0.0713695	0		{RXN2: BuDABCOI + 0.5 BuI --> 0.5 Bu2DABCOI2 + 0.5 BuDABCOI}
507.15	0.0236	0.0548	0.015	0.000127	0.042	0.0713695	1e-08
591.5	0.0225	0.0533	0.0165	0.000255	0.042	0.0713695	1e-08		RXN1 = K1f*DABCO*BuI - K1r*BuDABCOI
675.86	0.021	0.0518	0.018	0.000511	0.042	0.0713695	2e-08
760.22	0.0195	0.0503	0.0195	0.001023	0.042	0.0713695	5e-08		K1f = 0.01468
844.58	0.0189	0.0503	0.021	0.002047	0.0419999	0.0713694	9e-08		K1r = 0
1168.94	0.0152	0.0465	0.0248	0.004095	0.0419998	0.0713693	1.8e-07
1493.29	0.0128	0.045	0.0293	0.008191	0.0419996	0.0713692	3.6e-07		d/dt(DABCO) = -RXN1
1817.65	0.0107	0.0413	0.0308	0.016383	0.0419993	0.0713688	7.2e-07		d/dt(BuI) = -RXN1
2142.01	0.009	0.0398	0.033	0.032767	0.0419986	0.0713681	1.44e-06		d/dt(BuDABCOI) = RXN1
2466.37	0.0075	0.0383	0.0345	0.065535	0.0419971	0.0713666	2.88e-06
2790.72	0.00638	0.0368	0.036	0.131071	0.0419942	0.0713638	5.77e-06		INIT BuI = 0.07137
3115.08	0.00544	0.036	0.0368	0.262143	0.0419885	0.071358	1.153e-05		INIT DABCO = 0.042
3439.44	0.00469	0.0353	0.0375	0.524287	0.0419769	0.0713465	2.306e-05		INIT BuDABCOI = 0
3763.8	0.00394	0.0345	0.0383	1.04858	0.0419539	0.0713234	4.609e-05
4088.16	0.00375	0.0338	0.039	2.04858	0.04191	0.0712795	8.998e-05
4712.51	0.00281	0.033	0.0405	3.04858	0.0418662	0.0712357	0.00013379		Name	Value
5336.87	0.00206	0.0323	0.0413	4.04857	0.0418225	0.071192	0.00017753		STARTTIME	0
5961.23	0.00169	0.0315	0.0413	5.04857	0.0417788	0.0711483	0.00022119		STOPTIME	9000
6585.59	0.00131	0.0308	0.042	6.04857	0.0417352	0.0711047	0.00026479		DTMIN	1e-06
7209.94	0.00113	0.0308	0.042	7.04857	0.0416917	0.0710612	0.00030831		DTMAX	1
7834.3	0.00075	0.0308	0.0428	8.04857	0.0416482	0.0710178	0.00035176		DTOUT	0
8458.66	0.000563	0.03	0.042	9.04857	0.0416049	0.0709744	0.00039513		TOLERANCE	0.01
9083.02	0.000563	0.03	0.0428	10.0486	0.0415616	0.0709311	0.00043844		K1f *	0.01468
				11.0486	0.0415183	0.0708878	0.00048167		K1r	0
				12.0486	0.0414752	0.0708447	0.00052484		INIT DABCO	0.042
				13.0486	0.0414321	0.0708016	0.00056793		INIT BuI *	0.07137
				14.0486	0.041389	0.0707586	0.00061095		INIT BuDABCOI	0
				15.0486	0.0413461	0.0707156	0.0006539
				16.0486	0.0413032	0.0706727	0.00069678
				17.0486	0.0412604	0.0706299	0.00073959
				18.0486	0.0412177	0.0705872	0.00078233
				19.0486	0.041175	0.0705445	0.000825
				20.0486	0.0411324	0.0705019	0.0008676
				21.0486	0.0410899	0.0704594	0.00091013
				22.0486	0.0410474	0.0704169	0.00095258
				23.0486	0.041005	0.0703745	0.00099498
				24.0486	0.0409627	0.0703322	0.0010373
				25.0486	0.0409204	0.07029	0.00107955
				26.0486	0.0408783	0.0702478	0.00112173
				27.0486	0.0408362	0.0702057	0.00116385
				28.0486	0.0407941	0.0701636	0.00120589
				29.0486	0.0407521	0.0701216	0.00124787
				30.0486	0.0407102	0.0700797	0.00128978
				31.0486	0.0406684	0.0700379	0.00133162
				32.0486	0.0406266	0.0699961	0.00137339
				33.0486	0.0405849	0.0699544	0.0014151
				34.0486	0.0405433	0.0699128	0.00145673
				35.0486	0.0405017	0.0698712	0.00149831
				36.0486	0.0404602	0.0698297	0.00153981
				37.0486	0.0404188	0.0697883	0.00158124
				38.0486	0.0403774	0.0697469	0.00162261
				39.0486	0.0403361	0.0697056	0.00166391
				40.0486	0.0402949	0.0696644	0.00170515
				41.0486	0.0402537	0.0696232	0.00174632
				42.0486	0.0402126	0.0695821	0.00178742
				43.0486	0.0401715	0.069541	0.00182846
				44.0486	0.0401306	0.0695001	0.00186943
				45.0486	0.0400897	0.0694592	0.00191033
				46.0486	0.0400488	0.0694183	0.00195117
				47.0486	0.0400081	0.0693776	0.00199194
				48.0486	0.0399673	0.0693369	0.00203265
				49.0486	0.0399267	0.0692962	0.00207329
				50.0486	0.0398861	0.0692556	0.00211387
				51.0486	0.0398456	0.0692151	0.00215438
				52.0486	0.0398052	0.0691747	0.00219483
				53.0486	0.0397648	0.0691343	0.00223522
				54.0486	0.0397245	0.069094	0.00227553
				55.0486	0.0396842	0.0690537	0.00231579
				56.0486	0.039644	0.0690135	0.00235598
				57.0486	0.0396039	0.0689734	0.0023961
				58.0486	0.0395638	0.0689334	0.00243617
				59.0486	0.0395238	0.0688934	0.00247616
				60.0486	0.0394839	0.0688534	0.0025161
				61.0486	0.039444	0.0688135	0.00255597
				62.0486	0.0394042	0.0687737	0.00259578
				63.0486	0.0393645	0.068734	0.00263552
				64.0486	0.0393248	0.0686943	0.0026752
				65.0486	0.0392852	0.0686547	0.00271482
				66.0486	0.0392456	0.0686151	0.00275438
				67.0486	0.0392061	0.0685756	0.00279387
				68.0486	0.0391667	0.0685362	0.0028333
				69.0486	0.0391273	0.0684968	0.00287267
				70.0486	0.039088	0.0684575	0.00291198
				71.0486	0.0390488	0.0684183	0.00295122
				72.0486	0.0390096	0.0683791	0.00299041
				73.0486	0.0389705	0.06834	0.00302953
				74.0486	0.0389314	0.0683009	0.00306859
				75.0486	0.0388924	0.0682619	0.00310759
				76.0486	0.0388535	0.068223	0.00314652
				77.0486	0.0388146	0.0681841	0.0031854
				78.0486	0.0387758	0.0681453	0.00322421
				79.0486	0.038737	0.0681066	0.00326297
				80.0486	0.0386983	0.0680678	0.00330166
				81.0486	0.0386597	0.0680292	0.00334029
				82.0486	0.0386211	0.0679906	0.00337886
				83.0486	0.0385826	0.0679521	0.00341738
				84.0486	0.0385442	0.0679137	0.00345583
				85.0486	0.0385058	0.0678753	0.00349422
				86.0486	0.0384675	0.067837	0.00353255
				87.0486	0.0384292	0.0677987	0.00357082
				88.0486	0.038391	0.0677605	0.00360904
				89.0486	0.0383528	0.0677223	0.00364719
				90.0486	0.0383147	0.0676842	0.00368528
				91.0486	0.0382767	0.0676462	0.00372332
				92.0486	0.0382387	0.0676082	0.00376129
				93.0486	0.0382008	0.0675703	0.00379921
				94.0486	0.0381629	0.0675324	0.00383706
				95.0486	0.0381251	0.0674947	0.00387486
				96.0486	0.0380874	0.0674569	0.0039126
				97.0486	0.0380497	0.0674192	0.00395029
				98.0486	0.0380121	0.0673816	0.00398791
				99.0486	0.0379745	0.067344	0.00402547
				100.049	0.037937	0.0673065	0.00406298
				101.049	0.0378996	0.0672691	0.00410043
				102.049	0.0378622	0.0672317	0.00413782
				103.049	0.0378248	0.0671944	0.00417516
				104.049	0.0377876	0.0671571	0.00421243
				105.049	0.0377504	0.0671199	0.00424965
				106.049	0.0377132	0.0670827	0.00428681
				107.049	0.0376761	0.0670456	0.00432392
				108.049	0.037639	0.0670086	0.00436097
				109.049	0.037602	0.0669716	0.00439796
				110.049	0.0375651	0.0669346	0.00443489
				111.049	0.0375282	0.0668977	0.00447177
				112.049	0.0374914	0.0668609	0.00450859
				113.049	0.0374546	0.0668242	0.00454535
				114.049	0.0374179	0.0667874	0.00458206
				115.049	0.0373813	0.0667508	0.00461871
				116.049	0.0373447	0.0667142	0.00465531
				117.049	0.0373081	0.0666777	0.00469185
				118.049	0.0372717	0.0666412	0.00472834
				119.049	0.0372352	0.0666048	0.00476477
				120.049	0.0371989	0.0665684	0.00480114
				121.049	0.0371625	0.066532	0.00483746
				122.049	0.0371263	0.0664958	0.00487372
				123.049	0.0370901	0.0664596	0.00490993
				124.049	0.0370539	0.0664234	0.00494608
				125.049	0.0370178	0.0663873	0.00498218
				126.049	0.0369818	0.0663513	0.00501822
				127.049	0.0369458	0.0663153	0.00505421
				128.049	0.0369099	0.0662794	0.00509015
				129.049	0.036874	0.0662435	0.00512603
				130.049	0.0368382	0.0662077	0.00516185
				131.049	0.0368024	0.0661719	0.00519762
				132.049	0.0367667	0.0661362	0.00523334
				133.049	0.036731	0.0661005	0.005269
				134.049	0.0366954	0.0660649	0.00530461
				135.049	0.0366598	0.0660293	0.00534017
				136.049	0.0366243	0.0659938	0.00537567
				137.049	0.0365889	0.0659584	0.00541112
				138.049	0.0365535	0.065923	0.00544652
				139.049	0.0365181	0.0658877	0.00548186
				140.049	0.0364828	0.0658524	0.00551715
				141.049	0.0364476	0.0658171	0.00555239
				142.049	0.0364124	0.0657819	0.00558757
				143.049	0.0363773	0.0657468	0.0056227
				144.049	0.0363422	0.0657117	0.00565778
				145.049	0.0363072	0.0656767	0.0056928
				146.049	0.0362722	0.0656417	0.00572778
				147.049	0.0362373	0.0656068	0.0057627
				148.049	0.0362024	0.0655719	0.00579757
				149.049	0.0361676	0.0655371	0.00583239
				150.049	0.0361329	0.0655024	0.00586715
				151.049	0.0360981	0.0654677	0.00590186
				152.049	0.0360635	0.065433	0.00593652
				153.049	0.0360289	0.0653984	0.00597113
				154.049	0.0359943	0.0653638	0.00600569
				155.049	0.0359598	0.0653293	0.0060402
				156.049	0.0359253	0.0652949	0.00607466
				157.049	0.0358909	0.0652604	0.00610906
				158.049	0.0358566	0.0652261	0.00614341
				159.049	0.0358223	0.0651918	0.00617772
				160.049	0.035788	0.0651575	0.00621197
				161.049	0.0357538	0.0651233	0.00624617
				162.049	0.0357197	0.0650892	0.00628032
				163.049	0.0356856	0.0650551	0.00631442
				164.049	0.0356515	0.065021	0.00634847
				165.049	0.0356175	0.064987	0.00638247
				166.049	0.0355836	0.0649531	0.00641642
				167.049	0.0355497	0.0649192	0.00645032
				168.049	0.0355158	0.0648853	0.00648417
				169.049	0.035482	0.0648515	0.00651797
				170.049	0.0354483	0.0648178	0.00655172
				171.049	0.0354146	0.0647841	0.00658542
				172.049	0.0353809	0.0647505	0.00661907
				173.049	0.0353473	0.0647169	0.00665267
				174.049	0.0353138	0.0646833	0.00668622
				175.049	0.0352803	0.0646498	0.00671972
				176.049	0.0352468	0.0646163	0.00675317
				177.049	0.0352134	0.0645829	0.00678658
				178.049	0.0351801	0.0645496	0.00681993
				179.049	0.0351468	0.0645163	0.00685324
				180.049	0.0351135	0.064483	0.0068865
				181.049	0.0350803	0.0644498	0.00691971
				182.049	0.0350471	0.0644166	0.00695287
				183.049	0.035014	0.0643835	0.00698598
				184.049	0.0349809	0.0643505	0.00701905
				185.049	0.0349479	0.0643174	0.00705206
				186.049	0.034915	0.0642845	0.00708503
				187.049	0.034882	0.0642516	0.00711795
				188.049	0.0348492	0.0642187	0.00715082
				189.049	0.0348164	0.0641859	0.00718365
				190.049	0.0347836	0.0641531	0.00721642
				191.049	0.0347508	0.0641204	0.00724915
				192.049	0.0347182	0.0640877	0.00728183
				193.049	0.0346855	0.064055	0.00731447
				194.049	0.0346529	0.0640225	0.00734706
				195.049	0.0346204	0.0639899	0.0073796
				196.049	0.0345879	0.0639574	0.00741209
				197.049	0.0345555	0.063925	0.00744453
				198.049	0.0345231	0.0638926	0.00747693
				199.049	0.0344907	0.0638602	0.00750929
				200.049	0.0344584	0.0638279	0.00754159
				201.049	0.0344262	0.0637957	0.00757385
				202.049	0.0343939	0.0637634	0.00760606
				203.049	0.0343618	0.0637313	0.00763823
				204.049	0.0343297	0.0636992	0.00767035
				205.049	0.0342976	0.0636671	0.00770242
				206.049	0.0342655	0.0636351	0.00773445
				207.049	0.0342336	0.0636031	0.00776643
				208.049	0.0342016	0.0635711	0.00779837
				209.049	0.0341697	0.0635393	0.00783026
				210.049	0.0341379	0.0635074	0.0078621
				211.049	0.0341061	0.0634756	0.0078939
				212.049	0.0340744	0.0634439	0.00792565
				213.049	0.0340426	0.0634122	0.00795736
				214.049	0.034011	0.0633805	0.00798902
				215.049	0.0339794	0.0633489	0.00802064
				216.049	0.0339478	0.0633173	0.00805221
				217.049	0.0339163	0.0632858	0.00808374
				218.049	0.0338848	0.0632543	0.00811522
				219.049	0.0338533	0.0632228	0.00814666
				220.049	0.033822	0.0631915	0.00817805
				221.049	0.0337906	0.0631601	0.0082094
				222.049	0.0337593	0.0631288	0.0082407
				223.049	0.033728	0.0630976	0.00827196
				224.049	0.0336968	0.0630663	0.00830318
				225.049	0.0336656	0.0630352	0.00833435
				226.049	0.0336345	0.063004	0.00836547
				227.049	0.0336034	0.062973	0.00839655
				228.049	0.0335724	0.0629419	0.00842759
				229.049	0.0335414	0.0629109	0.00845859
				230.049	0.0335105	0.06288	0.00848954
				231.049	0.0334796	0.0628491	0.00852044
				232.049	0.0334487	0.0628182	0.0085513
				233.049	0.0334179	0.0627874	0.00858212
				234.049	0.0333871	0.0627566	0.0086129
				235.049	0.0333564	0.0627259	0.00864363
				236.049	0.0333257	0.0626952	0.00867432
				237.049	0.033295	0.0626645	0.00870496
				238.049	0.0332644	0.0626339	0.00873557
				239.049	0.0332339	0.0626034	0.00876613
				240.049	0.0332034	0.0625729	0.00879664
				241.049	0.0331729	0.0625424	0.00882712
				242.049	0.0331424	0.062512	0.00885755
				243.049	0.0331121	0.0624816	0.00888793
				244.049	0.0330817	0.0624512	0.00891828
				245.049	0.0330514	0.0624209	0.00894858
				246.049	0.0330212	0.0623907	0.00897884
				247.049	0.0329909	0.0623604	0.00900906
				248.049	0.0329608	0.0623303	0.00903924
				249.049	0.0329306	0.0623001	0.00906937
				250.049	0.0329005	0.0622701	0.00909946
				251.049	0.0328705	0.06224	0.00912951
				252.049	0.0328405	0.06221	0.00915952
				253.049	0.0328105	0.06218	0.00918949
				254.049	0.0327806	0.0621501	0.00921941
				255.049	0.0327507	0.0621202	0.00924929
				256.049	0.0327209	0.0620904	0.00927913
				257.049	0.0326911	0.0620606	0.00930893
				258.049	0.0326613	0.0620308	0.00933869
				259.049	0.0326316	0.0620011	0.00936841
				260.049	0.0326019	0.0619714	0.00939808
				261.049	0.0325723	0.0619418	0.00942772
				262.049	0.0325427	0.0619122	0.00945731
				263.049	0.0325131	0.0618826	0.00948686
				264.049	0.0324836	0.0618531	0.00951637
				265.049	0.0324542	0.0618237	0.00954584
				266.049	0.0324247	0.0617942	0.00957527
				267.049	0.0323953	0.0617649	0.00960466
				268.049	0.032366	0.0617355	0.00963401
				269.049	0.0323367	0.0617062	0.00966332
				270.049	0.0323074	0.0616769	0.00969258
				271.049	0.0322782	0.0616477	0.00972181
				272.049	0.032249	0.0616185	0.009751
				273.049	0.0322199	0.0615894	0.00978014
				274.049	0.0321907	0.0615603	0.00980925
				275.049	0.0321617	0.0615312	0.00983832
				276.049	0.0321327	0.0615022	0.00986734
				277.049	0.0321037	0.0614732	0.00989633
				278.049	0.0320747	0.0614442	0.00992528
				279.049	0.0320458	0.0614153	0.00995418
				280.049	0.032017	0.0613865	0.00998305
				281.049	0.0319881	0.0613576	0.0100119
				282.049	0.0319593	0.0613288	0.0100407
				283.049	0.0319306	0.0613001	0.0100694
				284.049	0.0319019	0.0612714	0.0100981
				285.049	0.0318732	0.0612427	0.0101268
				286.049	0.0318446	0.0612141	0.0101554
				287.049	0.031816	0.0611855	0.010184
				288.049	0.0317874	0.0611569	0.0102126
				289.049	0.0317589	0.0611284	0.0102411
				290.049	0.0317304	0.0611	0.0102696
				291.049	0.031702	0.0610715	0.010298
				292.049	0.0316736	0.0610431	0.0103264
				293.049	0.0316452	0.0610147	0.0103548
				294.049	0.0316169	0.0609864	0.0103831
				295.049	0.0315886	0.0609582	0.0104114
				296.049	0.0315604	0.0609299	0.0104396
				297.049	0.0315322	0.0609017	0.0104678
				298.049	0.031504	0.0608735	0.010496
				299.049	0.0314759	0.0608454	0.0105241
				300.049	0.0314478	0.0608173	0.0105522
				301.049	0.0314198	0.0607893	0.0105802
				302.049	0.0313917	0.0607612	0.0106083
				303.049	0.0313638	0.0607333	0.0106362
				304.049	0.0313358	0.0607053	0.0106642
				305.049	0.0313079	0.0606774	0.0106921
				306.049	0.03128	0.0606496	0.01072
				307.049	0.0312522	0.0606217	0.0107478
				308.049	0.0312244	0.0605939	0.0107756
				309.049	0.0311967	0.0605662	0.0108033
				310.049	0.031169	0.0605385	0.010831
				311.049	0.0311413	0.0605108	0.0108587
				312.049	0.0311136	0.0604832	0.0108863
				313.049	0.0310861	0.0604556	0.010914
				314.049	0.0310585	0.060428	0.0109415
				315.049	0.031031	0.0604005	0.010969
				316.049	0.0310035	0.060373	0.0109965
				317.049	0.030976	0.0603455	0.011024
				318.049	0.0309486	0.0603181	0.0110514
				319.049	0.0309212	0.0602907	0.0110788
				320.049	0.0308939	0.0602634	0.0111061
				321.049	0.0308665	0.0602361	0.0111334
				322.049	0.0308393	0.0602088	0.0111607
				323.049	0.0308121	0.0601816	0.011188
				324.049	0.0307848	0.0601544	0.0112152
				325.049	0.0307577	0.0601272	0.0112423
				326.049	0.0307306	0.0601001	0.0112694
				327.049	0.0307035	0.060073	0.0112965
				328.049	0.0306764	0.0600459	0.0113236
				329.049	0.0306494	0.0600189	0.0113506
				330.049	0.0306224	0.0599919	0.0113776
				331.049	0.0305955	0.059965	0.0114045
				332.049	0.0305685	0.0599381	0.0114314
				333.049	0.0305417	0.0599112	0.0114583
				334.049	0.0305148	0.0598844	0.0114852
				335.049	0.030488	0.0598576	0.011512
				336.049	0.0304613	0.0598308	0.0115387
				337.049	0.0304345	0.059804	0.0115655
				338.049	0.0304078	0.0597773	0.0115922
				339.049	0.0303812	0.0597507	0.0116188
				340.049	0.0303546	0.0597241	0.0116454
				341.049	0.030328	0.0596975	0.011672
				342.049	0.0303014	0.0596709	0.0116986
				343.049	0.0302749	0.0596444	0.0117251
				344.049	0.0302484	0.0596179	0.0117516
				345.049	0.0302219	0.0595914	0.0117781
				346.049	0.0301955	0.059565	0.0118045
				347.049	0.0301691	0.0595386	0.0118309
				348.049	0.0301428	0.0595123	0.0118572
				349.049	0.0301165	0.059486	0.0118835
				350.049	0.0300902	0.0594597	0.0119098
				351.049	0.030064	0.0594335	0.011936
				352.049	0.0300377	0.0594073	0.0119623
				353.049	0.0300116	0.0593811	0.0119884
				354.049	0.0299854	0.0593549	0.0120146
				355.049	0.0299593	0.0593288	0.0120407
				356.049	0.0299333	0.0593028	0.0120667
				357.049	0.0299072	0.0592767	0.0120928
				358.049	0.0298812	0.0592507	0.0121188
				359.049	0.0298552	0.0592248	0.0121447
				360.049	0.0298293	0.0591988	0.0121707
				361.049	0.0298034	0.0591729	0.0121966
				362.049	0.0297775	0.059147	0.0122225
				363.049	0.0297517	0.0591212	0.0122483
				364.049	0.0297259	0.0590954	0.0122741
				365.049	0.0297001	0.0590697	0.0122999
				366.049	0.0296744	0.0590439	0.0123256
				367.049	0.0296487	0.0590182	0.0123513
				368.049	0.029623	0.0589925	0.012377
				369.049	0.0295974	0.0589669	0.0124026
				370.049	0.0295718	0.0589413	0.0124282
				371.049	0.0295462	0.0589158	0.0124538
				372.049	0.0295207	0.0588902	0.0124793
				373.049	0.0294952	0.0588647	0.0125048
				374.049	0.0294697	0.0588393	0.0125303
				375.049	0.0294443	0.0588138	0.0125557
				376.049	0.0294189	0.0587884	0.0125811
				377.049	0.0293935	0.058763	0.0126065
				378.049	0.0293682	0.0587377	0.0126318
				379.049	0.0293429	0.0587124	0.0126571
				380.049	0.0293176	0.0586871	0.0126824
				381.049	0.0292924	0.0586619	0.0127076
				382.049	0.0292672	0.0586367	0.0127328
				383.049	0.029242	0.0586115	0.012758
				384.049	0.0292169	0.0585864	0.0127831
				385.049	0.0291918	0.0585613	0.0128082
				386.049	0.0291667	0.0585362	0.0128333
				387.049	0.0291416	0.0585112	0.0128584
				388.049	0.0291166	0.0584861	0.0128834
				389.049	0.0290917	0.0584612	0.0129084
				390.049	0.0290667	0.0584362	0.0129333
				391.049	0.0290418	0.0584113	0.0129582
				392.049	0.0290169	0.0583864	0.0129831
				393.049	0.0289921	0.0583616	0.0130079
				394.049	0.0289672	0.0583367	0.0130328
				395.049	0.0289425	0.058312	0.0130575
				396.049	0.0289177	0.0582872	0.0130823
				397.049	0.028893	0.0582625	0.013107
				398.049	0.0288683	0.0582378	0.0131317
				399.049	0.0288436	0.0582131	0.0131564
				400.049	0.028819	0.0581885	0.013181
				401.049	0.0287944	0.0581639	0.0132056
				402.049	0.0287698	0.0581393	0.0132302
				403.049	0.0287453	0.0581148	0.0132547
				404.049	0.0287208	0.0580903	0.0132792
				405.049	0.0286963	0.0580658	0.0133037
				406.049	0.0286719	0.0580414	0.0133281
				407.049	0.0286475	0.058017	0.0133525
				408.049	0.0286231	0.0579926	0.0133769
				409.049	0.0285987	0.0579682	0.0134013
				410.049	0.0285744	0.0579439	0.0134256
				411.049	0.0285501	0.0579196	0.0134499
				412.049	0.0285259	0.0578954	0.0134741
				413.049	0.0285016	0.0578712	0.0134983
				414.049	0.0284775	0.057847	0.0135225
				415.049	0.0284533	0.0578228	0.0135467
				416.049	0.0284292	0.0577987	0.0135708
				417.049	0.0284051	0.0577746	0.0135949
				418.049	0.028381	0.0577505	0.013619
				419.049	0.0283569	0.0577264	0.0136431
				420.049	0.0283329	0.0577024	0.0136671
				421.049	0.0283089	0.0576785	0.013691
				422.049	0.028285	0.0576545	0.013715
				423.049	0.0282611	0.0576306	0.0137389
				424.049	0.0282372	0.0576067	0.0137628
				425.049	0.0282133	0.0575828	0.0137867
				426.049	0.0281895	0.057559	0.0138105
				427.049	0.0281657	0.0575352	0.0138343
				428.049	0.0281419	0.0575114	0.0138581
				429.049	0.0281182	0.0574877	0.0138818
				430.049	0.0280945	0.057464	0.0139055
				431.049	0.0280708	0.0574403	0.0139292
				432.049	0.0280471	0.0574166	0.0139529
				433.049	0.0280235	0.057393	0.0139765
				434.049	0.0279999	0.0573694	0.0140001
				435.049	0.0279764	0.0573459	0.0140236
				436.049	0.0279528	0.0573223	0.0140472
				437.049	0.0279293	0.0572988	0.0140707
				438.049	0.0279058	0.0572754	0.0140941
				439.049	0.0278824	0.0572519	0.0141176
				440.049	0.027859	0.0572285	0.014141
				441.049	0.0278356	0.0572051	0.0141644
				442.049	0.0278122	0.0571818	0.0141878
				443.049	0.0277889	0.0571584	0.0142111
				444.049	0.0277656	0.0571351	0.0142344
				445.049	0.0277423	0.0571119	0.0142577
				446.049	0.0277191	0.0570886	0.0142809
				447.049	0.0276959	0.0570654	0.0143041
				448.049	0.0276727	0.0570422	0.0143273
				449.049	0.0276496	0.0570191	0.0143504
				450.049	0.0276264	0.0569959	0.0143736
				451.049	0.0276033	0.0569728	0.0143967
				452.049	0.0275803	0.0569498	0.0144197
				453.049	0.0275572	0.0569267	0.0144428
				454.049	0.0275342	0.0569037	0.0144658
				455.049	0.0275112	0.0568807	0.0144888
				456.049	0.0274883	0.0568578	0.0145117
				457.049	0.0274653	0.0568349	0.0145346
				458.049	0.0274425	0.056812	0.0145576
				459.049	0.0274196	0.0567891	0.0145804
				460.049	0.0273967	0.0567662	0.0146033
				461.049	0.0273739	0.0567434	0.0146261
				462.049	0.0273511	0.0567207	0.0146489
				463.049	0.0273284	0.0566979	0.0146716
				464.049	0.0273057	0.0566752	0.0146943
				465.049	0.027283	0.0566525	0.014717
				466.049	0.0272603	0.0566298	0.0147397
				467.049	0.0272376	0.0566072	0.0147624
				468.049	0.027215	0.0565845	0.014785
				469.049	0.0271924	0.0565619	0.0148076
				470.049	0.0271699	0.0565394	0.0148301
				471.049	0.0271473	0.0565169	0.0148527
				472.049	0.0271248	0.0564943	0.0148752
				473.049	0.0271024	0.0564719	0.0148976
				474.049	0.0270799	0.0564494	0.0149201
				475.049	0.0270575	0.056427	0.0149425
				476.049	0.0270351	0.0564046	0.0149649
				477.049	0.0270127	0.0563822	0.0149873
				478.049	0.0269904	0.0563599	0.0150096
				479.049	0.0269681	0.0563376	0.0150319
				480.049	0.0269458	0.0563153	0.0150542
				481.049	0.0269235	0.056293	0.0150765
				482.049	0.0269013	0.0562708	0.0150987
				483.049	0.0268791	0.0562486	0.0151209
				484.049	0.0268569	0.0562264	0.0151431
				485.049	0.0268348	0.0562043	0.0151652
				486.049	0.0268126	0.0561821	0.0151874
				487.049	0.0267905	0.05616	0.0152095
				488.049	0.0267685	0.056138	0.0152315
				489.049	0.0267464	0.0561159	0.0152536
				490.049	0.0267244	0.0560939	0.0152756
				491.049	0.0267024	0.0560719	0.0152976
				492.049	0.0266805	0.05605	0.0153195
				493.049	0.0266585	0.056028	0.0153415
				494.049	0.0266366	0.0560061	0.0153634
				495.049	0.0266147	0.0559842	0.0153853
				496.049	0.0265929	0.0559624	0.0154071
				497.049	0.026571	0.0559405	0.015429
				498.049	0.0265492	0.0559187	0.0154508
				499.049	0.0265275	0.055897	0.0154725
				500.049	0.0265057	0.0558752	0.0154943
				501.049	0.026484	0.0558535	0.015516
				502.049	0.0264623	0.0558318	0.0155377
				503.049	0.0264406	0.0558101	0.0155594
				504.049	0.026419	0.0557885	0.015581
				505.049	0.0263973	0.0557668	0.0156027
				506.049	0.0263757	0.0557453	0.0156243
				507.049	0.0263542	0.0557237	0.0156458
				508.049	0.0263326	0.0557021	0.0156674
				509.049	0.0263111	0.0556806	0.0156889
				510.049	0.0262896	0.0556591	0.0157104
				511.049	0.0262682	0.0556377	0.0157318
				512.049	0.0262467	0.0556162	0.0157533
				513.049	0.0262253	0.0555948	0.0157747
				514.049	0.0262039	0.0555734	0.0157961
				515.049	0.0261826	0.0555521	0.0158174
				516.049	0.0261612	0.0555307	0.0158388
				517.049	0.0261399	0.0555094	0.0158601
				518.049	0.0261186	0.0554881	0.0158814
				519.049	0.0260974	0.0554669	0.0159026
				520.049	0.0260761	0.0554456	0.0159239
				521.049	0.0260549	0.0554244	0.0159451
				522.049	0.0260338	0.0554033	0.0159663
				523.049	0.0260126	0.0553821	0.0159874
				524.049	0.0259915	0.055361	0.0160085
				525.049	0.0259703	0.0553399	0.0160296
				526.049	0.0259493	0.0553188	0.0160507
				527.049	0.0259282	0.0552977	0.0160718
				528.049	0.0259072	0.0552767	0.0160928
				529.049	0.0258862	0.0552557	0.0161138
				530.049	0.0258652	0.0552347	0.0161348
				531.049	0.0258442	0.0552137	0.0161558
				532.049	0.0258233	0.0551928	0.0161767
				533.049	0.0258024	0.0551719	0.0161976
				534.049	0.0257815	0.055151	0.0162185
				535.049	0.0257606	0.0551302	0.0162393
				536.049	0.0257398	0.0551093	0.0162602
				537.049	0.025719	0.0550885	0.016281
				538.049	0.0256982	0.0550677	0.0163018
				539.049	0.0256775	0.055047	0.0163225
				540.049	0.0256567	0.0550262	0.0163433
				541.049	0.025636	0.0550055	0.016364
				542.049	0.0256153	0.0549849	0.0163847
				543.049	0.0255947	0.0549642	0.0164053
				544.049	0.025574	0.0549436	0.016426
				545.049	0.0255534	0.0549229	0.0164466
				546.049	0.0255328	0.0549024	0.0164672
				547.049	0.0255123	0.0548818	0.0164877
				548.049	0.0254917	0.0548613	0.0165083
				549.049	0.0254712	0.0548407	0.0165288
				550.049	0.0254507	0.0548203	0.0165493
				551.049	0.0254303	0.0547998	0.0165697
				552.049	0.0254098	0.0547793	0.0165902
				553.049	0.0253894	0.0547589	0.0166106
				554.049	0.025369	0.0547385	0.016631
				555.049	0.0253486	0.0547182	0.0166514
				556.049	0.0253283	0.0546978	0.0166717
				557.049	0.025308	0.0546775	0.016692
				558.049	0.0252877	0.0546572	0.0167123
				559.049	0.0252674	0.0546369	0.0167326
				560.049	0.0252471	0.0546167	0.0167528
				561.049	0.0252269	0.0545964	0.0167731
				562.049	0.0252067	0.0545762	0.0167933
				563.049	0.0251865	0.0545561	0.0168135
				564.049	0.0251664	0.0545359	0.0168336
				565.049	0.0251462	0.0545158	0.0168538
				566.049	0.0251261	0.0544956	0.0168739
				567.049	0.0251061	0.0544756	0.016894
				568.049	0.025086	0.0544555	0.016914
				569.049	0.025066	0.0544355	0.016934
				570.049	0.0250459	0.0544154	0.0169541
				571.049	0.0250259	0.0543955	0.0169741
				572.049	0.025006	0.0543755	0.016994
				573.049	0.024986	0.0543555	0.017014
				574.049	0.0249661	0.0543356	0.0170339
				575.049	0.0249462	0.0543157	0.0170538
				576.049	0.0249263	0.0542958	0.0170737
				577.049	0.0249065	0.054276	0.0170935
				578.049	0.0248866	0.0542562	0.0171133
				579.049	0.0248668	0.0542364	0.0171332
				580.049	0.0248471	0.0542166	0.0171529
				581.049	0.0248273	0.0541968	0.0171727
				582.049	0.0248076	0.0541771	0.0171924
				583.049	0.0247878	0.0541573	0.0172122
				584.049	0.0247681	0.0541377	0.0172318
				585.049	0.0247485	0.054118	0.0172515
				586.049	0.0247288	0.0540983	0.0172712
				587.049	0.0247092	0.0540787	0.0172908
				588.049	0.0246896	0.0540591	0.0173104
				589.049	0.02467	0.0540395	0.01733
				590.049	0.0246505	0.05402	0.0173495
				591.049	0.0246309	0.0540004	0.0173691
				592.049	0.0246114	0.0539809	0.0173886
				593.049	0.0245919	0.0539615	0.0174081
				594.049	0.0245725	0.053942	0.0174275
				595.049	0.024553	0.0539225	0.017447
				596.049	0.0245336	0.0539031	0.0174664
				597.049	0.0245142	0.0538837	0.0174858
				598.049	0.0244948	0.0538643	0.0175052
				599.049	0.0244755	0.053845	0.0175245
				600.049	0.0244561	0.0538257	0.0175439
				601.049	0.0244368	0.0538063	0.0175632
				602.049	0.0244175	0.0537871	0.0175825
				603.049	0.0243983	0.0537678	0.0176017
				604.049	0.024379	0.0537485	0.017621
				605.049	0.0243598	0.0537293	0.0176402
				606.049	0.0243406	0.0537101	0.0176594
				607.049	0.0243214	0.053691	0.0176786
				608.049	0.0243023	0.0536718	0.0176977
				609.049	0.0242831	0.0536527	0.0177169
				610.049	0.024264	0.0536335	0.017736
				611.049	0.0242449	0.0536145	0.0177551
				612.049	0.0242259	0.0535954	0.0177741
				613.049	0.0242068	0.0535763	0.0177932
				614.049	0.0241878	0.0535573	0.0178122
				615.049	0.0241688	0.0535383	0.0178312
				616.049	0.0241498	0.0535193	0.0178502
				617.049	0.0241309	0.0535004	0.0178691
				618.049	0.0241119	0.0534814	0.0178881
				619.049	0.024093	0.0534625	0.017907
				620.049	0.0240741	0.0534436	0.0179259
				621.049	0.0240552	0.0534248	0.0179448
				622.049	0.0240364	0.0534059	0.0179636
				623.049	0.0240175	0.0533871	0.0179825
				624.049	0.0239987	0.0533682	0.0180013
				625.049	0.0239799	0.0533495	0.01802
				626.049	0.0239612	0.0533307	0.0180388
				627.049	0.0239424	0.0533119	0.0180576
				628.049	0.0239237	0.0532932	0.0180763
				629.049	0.023905	0.0532745	0.018095
				630.049	0.0238863	0.0532558	0.0181137
				631.049	0.0238677	0.0532372	0.0181323
				632.049	0.023849	0.0532185	0.018151
				633.049	0.0238304	0.0531999	0.0181696
				634.049	0.0238118	0.0531813	0.0181882
				635.049	0.0237932	0.0531628	0.0182068
				636.049	0.0237747	0.0531442	0.0182253
				637.049	0.0237562	0.0531257	0.0182438
				638.049	0.0237376	0.0531071	0.0182624
				639.049	0.0237191	0.0530887	0.0182809
				640.049	0.0237007	0.0530702	0.0182993
				641.049	0.0236822	0.0530517	0.0183178
				642.049	0.0236638	0.0530333	0.0183362
				643.049	0.0236454	0.0530149	0.0183546
				644.049	0.023627	0.0529965	0.018373
				645.049	0.0236086	0.0529781	0.0183914
				646.049	0.0235903	0.0529598	0.0184097
				647.049	0.0235719	0.0529415	0.0184281
				648.049	0.0235536	0.0529232	0.0184464
				649.049	0.0235354	0.0529049	0.0184646
				650.049	0.0235171	0.0528866	0.0184829
				651.049	0.0234988	0.0528684	0.0185012
				652.049	0.0234806	0.0528501	0.0185194
				653.049	0.0234624	0.0528319	0.0185376
				654.049	0.0234442	0.0528137	0.0185558
				655.049	0.0234261	0.0527956	0.0185739
				656.049	0.0234079	0.0527774	0.0185921
				657.049	0.0233898	0.0527593	0.0186102
				658.049	0.0233717	0.0527412	0.0186283
				659.049	0.0233536	0.0527231	0.0186464
				660.049	0.0233356	0.0527051	0.0186644
				661.049	0.0233175	0.052687	0.0186825
				662.049	0.0232995	0.052669	0.0187005
				663.049	0.0232815	0.052651	0.0187185
				664.049	0.0232635	0.052633	0.0187365
				665.049	0.0232455	0.052615	0.0187545
				666.049	0.0232276	0.0525971	0.0187724
				667.049	0.0232097	0.0525792	0.0187903
				668.049	0.0231918	0.0525613	0.0188082
				669.049	0.0231739	0.0525434	0.0188261
				670.049	0.023156	0.0525255	0.018844
				671.049	0.0231382	0.0525077	0.0188618
				672.049	0.0231204	0.0524899	0.0188796
				673.049	0.0231026	0.0524721	0.0188974
				674.049	0.0230848	0.0524543	0.0189152
				675.049	0.023067	0.0524365	0.018933
				676.049	0.0230493	0.0524188	0.0189507
				677.049	0.0230316	0.0524011	0.0189685
				678.049	0.0230138	0.0523834	0.0189862
				679.049	0.0229962	0.0523657	0.0190038
				680.049	0.0229785	0.052348	0.0190215
				681.049	0.0229609	0.0523304	0.0190392
				682.049	0.0229432	0.0523127	0.0190568
				683.049	0.0229256	0.0522951	0.0190744
				684.049	0.022908	0.0522775	0.019092
				685.049	0.0228905	0.05226	0.0191095
				686.049	0.0228729	0.0522424	0.0191271
				687.049	0.0228554	0.0522249	0.0191446
				688.049	0.0228379	0.0522074	0.0191621
				689.049	0.0228204	0.0521899	0.0191796
				690.049	0.0228029	0.0521724	0.0191971
				691.049	0.0227855	0.052155	0.0192145
				692.049	0.022768	0.0521375	0.019232
				693.049	0.0227506	0.0521201	0.0192494
				694.049	0.0227332	0.0521027	0.0192668
				695.049	0.0227158	0.0520854	0.0192842
				696.049	0.0226985	0.052068	0.0193015
				697.049	0.0226812	0.0520507	0.0193188
				698.049	0.0226638	0.0520333	0.0193362
				699.049	0.0226465	0.052016	0.0193535
				700.049	0.0226293	0.0519988	0.0193707
				701.049	0.022612	0.0519815	0.019388
				702.049	0.0225947	0.0519643	0.0194053
				703.049	0.0225775	0.051947	0.0194225
				704.049	0.0225603	0.0519298	0.0194397
				705.049	0.0225431	0.0519126	0.0194569
				706.049	0.022526	0.0518955	0.019474
				707.049	0.0225088	0.0518783	0.0194912
				708.049	0.0224917	0.0518612	0.0195083
				709.049	0.0224746	0.0518441	0.0195254
				710.049	0.0224575	0.051827	0.0195425
				711.049	0.0224404	0.0518099	0.0195596
				712.049	0.0224234	0.0517929	0.0195767
				713.049	0.0224063	0.0517758	0.0195937
				714.049	0.0223893	0.0517588	0.0196107
				715.049	0.0223723	0.0517418	0.0196277
				716.049	0.0223553	0.0517248	0.0196447
				717.049	0.0223383	0.0517079	0.0196616
				718.049	0.0223214	0.0516909	0.0196786
				719.049	0.0223045	0.051674	0.0196955
				720.049	0.0222876	0.0516571	0.0197124
				721.049	0.0222707	0.0516402	0.0197293
				722.049	0.0222538	0.0516233	0.0197462
				723.049	0.022237	0.0516065	0.019763
				724.049	0.0222201	0.0515896	0.0197799
				725.049	0.0222033	0.0515728	0.0197967
				726.049	0.0221865	0.051556	0.0198135
				727.049	0.0221697	0.0515392	0.0198303
				728.049	0.022153	0.0515225	0.019847
				729.049	0.0221362	0.0515057	0.0198638
				730.049	0.0221195	0.051489	0.0198805
				731.049	0.0221028	0.0514723	0.0198972
				732.049	0.0220861	0.0514556	0.0199139
				733.049	0.0220694	0.0514389	0.0199306
				734.049	0.0220528	0.0514223	0.0199472
				735.049	0.0220361	0.0514056	0.0199639
				736.049	0.0220195	0.051389	0.0199805
				737.049	0.0220029	0.0513724	0.0199971
				738.049	0.0219863	0.0513559	0.0200137
				739.049	0.0219698	0.0513393	0.0200302
				740.049	0.0219532	0.0513227	0.0200468
				741.049	0.0219367	0.0513062	0.0200633
				742.049	0.0219202	0.0512897	0.0200798
				743.049	0.0219037	0.0512732	0.0200963
				744.049	0.0218872	0.0512567	0.0201128
				745.049	0.0218708	0.0512403	0.0201292
				746.049	0.0218543	0.0512238	0.0201457
				747.049	0.0218379	0.0512074	0.0201621
				748.049	0.0218215	0.051191	0.0201785
				749.049	0.0218051	0.0511746	0.0201949
				750.049	0.0217887	0.0511583	0.0202113
				751.049	0.0217724	0.0511419	0.0202276
				752.049	0.021756	0.0511256	0.020244
				753.049	0.0217397	0.0511093	0.0202603
				754.049	0.0217234	0.0510929	0.0202766
				755.049	0.0217072	0.0510767	0.0202929
				756.049	0.0216909	0.0510604	0.0203091
				757.049	0.0216746	0.0510442	0.0203254
				758.049	0.0216584	0.0510279	0.0203416
				759.049	0.0216422	0.0510117	0.0203578
				760.049	0.021626	0.0509955	0.020374
				761.049	0.0216098	0.0509793	0.0203902
				762.049	0.0215937	0.0509632	0.0204063
				763.049	0.0215775	0.050947	0.0204225
				764.049	0.0215614	0.0509309	0.0204386
				765.049	0.0215453	0.0509148	0.0204547
				766.049	0.0215292	0.0508987	0.0204708
				767.049	0.0215131	0.0508826	0.0204869
				768.049	0.0214971	0.0508666	0.0205029
				769.049	0.021481	0.0508505	0.020519
				770.049	0.021465	0.0508345	0.020535
				771.049	0.021449	0.0508185	0.020551
				772.049	0.021433	0.0508025	0.020567
				773.049	0.021417	0.0507865	0.020583
				774.049	0.0214011	0.0507706	0.0205989
				775.049	0.0213851	0.0507546	0.0206149
				776.049	0.0213692	0.0507387	0.0206308
				777.049	0.0213533	0.0507228	0.0206467
				778.049	0.0213374	0.0507069	0.0206626
				779.049	0.0213215	0.050691	0.0206785
				780.049	0.0213057	0.0506752	0.0206943
				781.049	0.0212898	0.0506593	0.0207102
				782.049	0.021274	0.0506435	0.020726
				783.049	0.0212582	0.0506277	0.0207418
				784.049	0.0212424	0.0506119	0.0207576
				785.049	0.0212266	0.0505962	0.0207733
				786.049	0.0212109	0.0505804	0.0207891
				787.049	0.0211952	0.0505647	0.0208048
				788.049	0.0211794	0.050549	0.0208206
				789.049	0.0211637	0.0505332	0.0208363
				790.049	0.021148	0.0505176	0.020852
				791.049	0.0211324	0.0505019	0.0208676
				792.049	0.0211167	0.0504862	0.0208833
				793.049	0.0211011	0.0504706	0.0208989
				794.049	0.0210854	0.050455	0.0209146
				795.049	0.0210698	0.0504394	0.0209302
				796.049	0.0210543	0.0504238	0.0209457
				797.049	0.0210387	0.0504082	0.0209613
				798.049	0.0210231	0.0503926	0.0209769
				799.049	0.0210076	0.0503771	0.0209924
				800.049	0.0209921	0.0503616	0.021008
				801.049	0.0209765	0.0503461	0.0210235
				802.049	0.020961	0.0503306	0.021039
				803.049	0.0209456	0.0503151	0.0210544
				804.049	0.0209301	0.0502996	0.0210699
				805.049	0.0209147	0.0502842	0.0210853
				806.049	0.0208992	0.0502688	0.0211008
				807.049	0.0208838	0.0502533	0.0211162
				808.049	0.0208684	0.0502379	0.0211316
				809.049	0.0208531	0.0502226	0.021147
				810.049	0.0208377	0.0502072	0.0211623
				811.049	0.0208223	0.0501919	0.0211777
				812.049	0.020807	0.0501765	0.021193
				813.049	0.0207917	0.0501612	0.0212083
				814.049	0.0207764	0.0501459	0.0212236
				815.049	0.0207611	0.0501306	0.0212389
				816.049	0.0207458	0.0501154	0.0212542
				817.049	0.0207306	0.0501001	0.0212694
				818.049	0.0207154	0.0500849	0.0212846
				819.049	0.0207001	0.0500696	0.0212999
				820.049	0.0206849	0.0500544	0.0213151
				821.049	0.0206697	0.0500393	0.0213303
				822.049	0.0206546	0.0500241	0.0213454
				823.049	0.0206394	0.0500089	0.0213606
				824.049	0.0206243	0.0499938	0.0213757
				825.049	0.0206091	0.0499786	0.0213909
				826.049	0.020594	0.0499635	0.021406
				827.049	0.0205789	0.0499484	0.0214211
				828.049	0.0205639	0.0499334	0.0214362
				829.049	0.0205488	0.0499183	0.0214512
				830.049	0.0205337	0.0499033	0.0214663
				831.049	0.0205187	0.0498882	0.0214813
				832.049	0.0205037	0.0498732	0.0214963
				833.049	0.0204887	0.0498582	0.0215113
				834.049	0.0204737	0.0498432	0.0215263
				835.049	0.0204587	0.0498282	0.0215413
				836.049	0.0204438	0.0498133	0.0215562
				837.049	0.0204288	0.0497983	0.0215712
				838.049	0.0204139	0.0497834	0.0215861
				839.049	0.020399	0.0497685	0.021601
				840.049	0.0203841	0.0497536	0.0216159
				841.049	0.0203692	0.0497387	0.0216308
				842.049	0.0203544	0.0497239	0.0216456
				843.049	0.0203395	0.049709	0.0216605
				844.049	0.0203247	0.0496942	0.0216753
				845.049	0.0203099	0.0496794	0.0216901
				846.049	0.0202951	0.0496646	0.0217049
				847.049	0.0202803	0.0496498	0.0217197
				848.049	0.0202655	0.049635	0.0217345
				849.049	0.0202508	0.0496203	0.0217492
				850.049	0.020236	0.0496055	0.021764
				851.049	0.0202213	0.0495908	0.0217787
				852.049	0.0202066	0.0495761	0.0217934
				853.049	0.0201919	0.0495614	0.0218081
				854.049	0.0201772	0.0495467	0.0218228
				855.049	0.0201625	0.0495321	0.0218375
				856.049	0.0201479	0.0495174	0.0218521
				857.049	0.0201332	0.0495028	0.0218668
				858.049	0.0201186	0.0494881	0.0218814
				859.049	0.020104	0.0494735	0.021896
				860.049	0.0200894	0.0494589	0.0219106
				861.049	0.0200749	0.0494444	0.0219252
				862.049	0.0200603	0.0494298	0.0219397
				863.049	0.0200457	0.0494153	0.0219543
				864.049	0.0200312	0.0494007	0.0219688
				865.049	0.0200167	0.0493862	0.0219833
				866.049	0.0200022	0.0493717	0.0219978
				867.049	0.0199877	0.0493572	0.0220123
				868.049	0.0199732	0.0493427	0.0220268
				869.049	0.0199588	0.0493283	0.0220412
				870.049	0.0199443	0.0493138	0.0220557
				871.049	0.0199299	0.0492994	0.0220701
				872.049	0.0199155	0.049285	0.0220845
				873.049	0.0199011	0.0492706	0.0220989
				874.049	0.0198867	0.0492562	0.0221133
				875.049	0.0198723	0.0492418	0.0221277
				876.049	0.019858	0.0492275	0.022142
				877.049	0.0198436	0.0492131	0.0221564
				878.049	0.0198293	0.0491988	0.0221707
				879.049	0.019815	0.0491845	0.022185
				880.049	0.0198007	0.0491702	0.0221993
				881.049	0.0197864	0.0491559	0.0222136
				882.049	0.0197721	0.0491417	0.0222279
				883.049	0.0197579	0.0491274	0.0222421
				884.049	0.0197437	0.0491132	0.0222563
				885.049	0.0197294	0.0490989	0.0222706
				886.049	0.0197152	0.0490847	0.0222848
				887.049	0.019701	0.0490705	0.022299
				888.049	0.0196868	0.0490563	0.0223132
				889.049	0.0196727	0.0490422	0.0223273
				890.049	0.0196585	0.049028	0.0223415
				891.049	0.0196444	0.0490139	0.0223556
				892.049	0.0196302	0.0489998	0.0223698
				893.049	0.0196161	0.0489857	0.0223839
				894.049	0.019602	0.0489716	0.0223979
				895.049	0.019588	0.0489575	0.022412
				896.049	0.0195739	0.0489434	0.0224261
				897.049	0.0195598	0.0489294	0.0224402
				898.049	0.0195458	0.0489153	0.0224542
				899.049	0.0195318	0.0489013	0.0224682
				900.049	0.0195178	0.0488873	0.0224822
				901.049	0.0195038	0.0488733	0.0224962
				902.049	0.0194898	0.0488593	0.0225102
				903.049	0.0194758	0.0488453	0.0225242
				904.049	0.0194618	0.0488314	0.0225381
				905.049	0.0194479	0.0488174	0.0225521
				906.049	0.019434	0.0488035	0.022566
				907.049	0.0194201	0.0487896	0.0225799
				908.049	0.0194062	0.0487757	0.0225938
				909.049	0.0193923	0.0487618	0.0226077
				910.049	0.0193784	0.0487479	0.0226216
				911.049	0.0193646	0.0487341	0.0226355
				912.049	0.0193507	0.0487202	0.0226493
				913.049	0.0193369	0.0487064	0.0226631
				914.049	0.0193231	0.0486926	0.0226769
				915.049	0.0193093	0.0486788	0.0226907
				916.049	0.0192955	0.048665	0.0227045
				917.049	0.0192817	0.0486512	0.0227183
				918.049	0.0192679	0.0486374	0.0227321
				919.049	0.0192542	0.0486237	0.0227458
				920.049	0.0192404	0.04861	0.0227595
				921.049	0.0192267	0.0485962	0.0227733
				922.049	0.019213	0.0485825	0.022787
				923.049	0.0191993	0.0485688	0.0228007
				924.049	0.0191856	0.0485552	0.0228144
				925.049	0.019172	0.0485415	0.022828
				926.049	0.0191583	0.0485278	0.0228417
				927.049	0.0191447	0.0485142	0.0228553
				928.049	0.0191311	0.0485006	0.0228689
				929.049	0.0191175	0.048487	0.0228826
				930.049	0.0191038	0.0484734	0.0228962
				931.049	0.0190903	0.0484598	0.0229097
				932.049	0.0190767	0.0484462	0.0229233
				933.049	0.0190631	0.0484327	0.0229369
				934.049	0.0190496	0.0484191	0.0229504
				935.049	0.0190361	0.0484056	0.0229639
				936.049	0.0190225	0.048392	0.0229775
				937.049	0.019009	0.0483785	0.022991
				938.049	0.0189955	0.0483651	0.0230045
				939.049	0.0189821	0.0483516	0.0230179
				940.049	0.0189686	0.0483381	0.0230314
				941.049	0.0189552	0.0483247	0.0230448
				942.049	0.0189417	0.0483112	0.0230583
				943.049	0.0189283	0.0482978	0.0230717
				944.049	0.0189149	0.0482844	0.0230851
				945.049	0.0189015	0.048271	0.0230985
				946.049	0.0188881	0.0482576	0.0231119
				947.049	0.0188747	0.0482442	0.0231253
				948.049	0.0188614	0.0482309	0.0231386
				949.049	0.018848	0.0482175	0.023152
				950.049	0.0188347	0.0482042	0.0231653
				951.049	0.0188214	0.0481909	0.0231786
				952.049	0.0188081	0.0481776	0.0231919
				953.049	0.0187948	0.0481643	0.0232052
				954.049	0.0187815	0.048151	0.0232185
				955.049	0.0187682	0.0481377	0.0232318
				956.049	0.018755	0.0481245	0.023245
				957.049	0.0187417	0.0481112	0.0232583
				958.049	0.0187285	0.048098	0.0232715
				959.049	0.0187153	0.0480848	0.0232847
				960.049	0.0187021	0.0480716	0.0232979
				961.049	0.0186889	0.0480584	0.0233111
				962.049	0.0186757	0.0480452	0.0233243
				963.049	0.0186625	0.0480321	0.0233375
				964.049	0.0186494	0.0480189	0.0233506
				965.049	0.0186363	0.0480058	0.0233637
				966.049	0.0186231	0.0479926	0.0233769
				967.049	0.01861	0.0479795	0.02339
				968.049	0.0185969	0.0479664	0.0234031
				969.049	0.0185838	0.0479533	0.0234162
				970.049	0.0185708	0.0479403	0.0234292
				971.049	0.0185577	0.0479272	0.0234423
				972.049	0.0185446	0.0479142	0.0234553
				973.049	0.0185316	0.0479011	0.0234684
				974.049	0.0185186	0.0478881	0.0234814
				975.049	0.0185056	0.0478751	0.0234944
				976.049	0.0184926	0.0478621	0.0235074
				977.049	0.0184796	0.0478491	0.0235204
				978.049	0.0184666	0.0478361	0.0235334
				979.049	0.0184537	0.0478232	0.0235463
				980.049	0.0184407	0.0478102	0.0235593
				981.049	0.0184278	0.0477973	0.0235722
				982.049	0.0184149	0.0477844	0.0235851
				983.049	0.018402	0.0477715	0.023598
				984.049	0.0183891	0.0477586	0.0236109
				985.049	0.0183762	0.0477457	0.0236238
				986.049	0.0183633	0.0477328	0.0236367
				987.049	0.0183504	0.0477199	0.0236496
				988.049	0.0183376	0.0477071	0.0236624
				989.049	0.0183248	0.0476943	0.0236752
				990.049	0.0183119	0.0476815	0.0236881
				991.049	0.0182991	0.0476686	0.0237009
				992.049	0.0182863	0.0476558	0.0237137
				993.049	0.0182735	0.0476431	0.0237264
				994.049	0.0182608	0.0476303	0.0237392
				995.049	0.018248	0.0476175	0.023752
				996.049	0.0182353	0.0476048	0.0237647
				997.049	0.0182225	0.047592	0.0237775
				998.049	0.0182098	0.0475793	0.0237902
				999.049	0.0181971	0.0475666	0.0238029
				1000.05	0.0181844	0.0475539	0.0238156
				1001.05	0.0181717	0.0475412	0.0238283
				1002.05	0.018159	0.0475286	0.023841
				1003.05	0.0181464	0.0475159	0.0238536
				1004.05	0.0181337	0.0475032	0.0238663
				1005.05	0.0181211	0.0474906	0.0238789
				1006.05	0.0181085	0.047478	0.0238915
				1007.05	0.0180959	0.0474654	0.0239041
				1008.05	0.0180832	0.0474528	0.0239168
				1009.05	0.0180707	0.0474402	0.0239293
				1010.05	0.0180581	0.0474276	0.0239419
				1011.05	0.0180455	0.047415	0.0239545
				1012.05	0.018033	0.0474025	0.023967
				1013.05	0.0180204	0.0473899	0.0239796
				1014.05	0.0180079	0.0473774	0.0239921
				1015.05	0.0179954	0.0473649	0.0240046
				1016.05	0.0179829	0.0473524	0.0240171
				1017.05	0.0179704	0.0473399	0.0240296
				1018.05	0.0179579	0.0473274	0.0240421
				1019.05	0.0179454	0.047315	0.0240546
				1020.05	0.017933	0.0473025	0.024067
				1021.05	0.0179205	0.0472901	0.0240795
				1022.05	0.0179081	0.0472776	0.0240919
				1023.05	0.0178957	0.0472652	0.0241043
				1024.05	0.0178833	0.0472528	0.0241167
				1025.05	0.0178709	0.0472404	0.0241291
				1026.05	0.0178585	0.047228	0.0241415
				1027.05	0.0178461	0.0472156	0.0241539
				1028.05	0.0178337	0.0472033	0.0241663
				1029.05	0.0178214	0.0471909	0.0241786
				1030.05	0.0178091	0.0471786	0.0241909
				1031.05	0.0177967	0.0471662	0.0242033
				1032.05	0.0177844	0.0471539	0.0242156
				1033.05	0.0177721	0.0471416	0.0242279
				1034.05	0.0177598	0.0471293	0.0242402
				1035.05	0.0177476	0.0471171	0.0242524
				1036.05	0.0177353	0.0471048	0.0242647
				1037.05	0.017723	0.0470925	0.024277
				1038.05	0.0177108	0.0470803	0.0242892
				1039.05	0.0176986	0.0470681	0.0243014
				1040.05	0.0176863	0.0470558	0.0243137
				1041.05	0.0176741	0.0470436	0.0243259
				1042.05	0.0176619	0.0470314	0.0243381
				1043.05	0.0176497	0.0470192	0.0243503
				1044.05	0.0176376	0.0470071	0.0243624
				1045.05	0.0176254	0.0469949	0.0243746
				1046.05	0.0176132	0.0469827	0.0243868
				1047.05	0.0176011	0.0469706	0.0243989
				1048.05	0.017589	0.0469585	0.024411
				1049.05	0.0175769	0.0469464	0.0244231
				1050.05	0.0175648	0.0469343	0.0244352
				1051.05	0.0175527	0.0469222	0.0244473
				1052.05	0.0175406	0.0469101	0.0244594
				1053.05	0.0175285	0.046898	0.0244715
				1054.05	0.0175164	0.046886	0.0244836
				1055.05	0.0175044	0.0468739	0.0244956
				1056.05	0.0174924	0.0468619	0.0245076
				1057.05	0.0174803	0.0468498	0.0245197
				1058.05	0.0174683	0.0468378	0.0245317
				1059.05	0.0174563	0.0468258	0.0245437
				1060.05	0.0174443	0.0468138	0.0245557
				1061.05	0.0174323	0.0468018	0.0245677
				1062.05	0.0174204	0.0467899	0.0245796
				1063.05	0.0174084	0.0467779	0.0245916
				1064.05	0.0173965	0.046766	0.0246035
				1065.05	0.0173845	0.046754	0.0246155
				1066.05	0.0173726	0.0467421	0.0246274
				1067.05	0.0173607	0.0467302	0.0246393
				1068.05	0.0173488	0.0467183	0.0246512
				1069.05	0.0173369	0.0467064	0.0246631
				1070.05	0.017325	0.0466945	0.024675
				1071.05	0.0173131	0.0466827	0.0246868
				1072.05	0.0173013	0.0466708	0.0246987
				1073.05	0.0172895	0.046659	0.0247106
				1074.05	0.0172776	0.0466471	0.0247224
				1075.05	0.0172658	0.0466353	0.0247342
				1076.05	0.017254	0.0466235	0.024746
				1077.05	0.0172422	0.0466117	0.0247578
				1078.05	0.0172304	0.0465999	0.0247696
				1079.05	0.0172186	0.0465881	0.0247814
				1080.05	0.0172068	0.0465764	0.0247932
				1081.05	0.0171951	0.0465646	0.0248049
				1082.05	0.0171833	0.0465528	0.0248167
				1083.05	0.0171716	0.0465411	0.0248284
				1084.05	0.0171599	0.0465294	0.0248401
				1085.05	0.0171482	0.0465177	0.0248519
				1086.05	0.0171365	0.046506	0.0248636
				1087.05	0.0171248	0.0464943	0.0248752
				1088.05	0.0171131	0.0464826	0.0248869
				1089.05	0.0171014	0.0464709	0.0248986
				1090.05	0.0170898	0.0464593	0.0249102
				1091.05	0.0170781	0.0464476	0.0249219
				1092.05	0.0170665	0.046436	0.0249335
				1093.05	0.0170548	0.0464244	0.0249452
				1094.05	0.0170432	0.0464127	0.0249568
				1095.05	0.0170316	0.0464011	0.0249684
				1096.05	0.01702	0.0463895	0.02498
				1097.05	0.0170084	0.046378	0.0249916
				1098.05	0.0169969	0.0463664	0.0250031
				1099.05	0.0169853	0.0463548	0.0250147
				1100.05	0.0169737	0.0463433	0.0250262
				1101.05	0.0169622	0.0463317	0.0250378
				1102.05	0.0169507	0.0463202	0.0250493
				1103.05	0.0169392	0.0463087	0.0250608
				1104.05	0.0169276	0.0462972	0.0250724
				1105.05	0.0169162	0.0462857	0.0250838
				1106.05	0.0169047	0.0462742	0.0250953
				1107.05	0.0168932	0.0462627	0.0251068
				1108.05	0.0168817	0.0462512	0.0251183
				1109.05	0.0168703	0.0462398	0.0251297
				1110.05	0.0168588	0.0462283	0.0251412
				1111.05	0.0168474	0.0462169	0.0251526
				1112.05	0.016836	0.0462055	0.025164
				1113.05	0.0168246	0.0461941	0.0251754
				1114.05	0.0168132	0.0461827	0.0251868
				1115.05	0.0168018	0.0461713	0.0251982
				1116.05	0.0167904	0.0461599	0.0252096
				1117.05	0.016779	0.0461485	0.025221
				1118.05	0.0167676	0.0461372	0.0252324
				1119.05	0.0167563	0.0461258	0.0252437
				1120.05	0.016745	0.0461145	0.025255
				1121.05	0.0167336	0.0461032	0.0252664
				1122.05	0.0167223	0.0460918	0.0252777
				1123.05	0.016711	0.0460805	0.025289
				1124.05	0.0166997	0.0460692	0.0253003
				1125.05	0.0166884	0.0460579	0.0253116
				1126.05	0.0166772	0.0460467	0.0253229
				1127.05	0.0166659	0.0460354	0.0253341
				1128.05	0.0166546	0.0460241	0.0253454
				1129.05	0.0166434	0.0460129	0.0253566
				1130.05	0.0166321	0.0460017	0.0253679
				1131.05	0.0166209	0.0459904	0.0253791
				1132.05	0.0166097	0.0459792	0.0253903
				1133.05	0.0165985	0.045968	0.0254015
				1134.05	0.0165873	0.0459568	0.0254127
				1135.05	0.0165761	0.0459456	0.0254239
				1136.05	0.0165649	0.0459345	0.0254351
				1137.05	0.0165538	0.0459233	0.0254462
				1138.05	0.0165426	0.0459121	0.0254574
				1139.05	0.0165315	0.045901	0.0254685
				1140.05	0.0165204	0.0458899	0.0254796
				1141.05	0.0165092	0.0458788	0.0254908
				1142.05	0.0164981	0.0458676	0.0255019
				1143.05	0.016487	0.0458565	0.025513
				1144.05	0.0164759	0.0458454	0.0255241
				1145.05	0.0164648	0.0458344	0.0255351
				1146.05	0.0164538	0.0458233	0.0255462
				1147.05	0.0164427	0.0458122	0.0255573
				1148.05	0.0164317	0.0458012	0.0255683
				1149.05	0.0164206	0.0457901	0.0255794
				1150.05	0.0164096	0.0457791	0.0255904
				1151.05	0.0163986	0.0457681	0.0256014
				1152.05	0.0163876	0.0457571	0.0256124
				1153.05	0.0163766	0.0457461	0.0256234
				1154.05	0.0163656	0.0457351	0.0256344
				1155.05	0.0163546	0.0457241	0.0256454
				1156.05	0.0163436	0.0457131	0.0256564
				1157.05	0.0163327	0.0457022	0.0256673
				1158.05	0.0163217	0.0456912	0.0256783
				1159.05	0.0163108	0.0456803	0.0256892
				1160.05	0.0162998	0.0456693	0.0257002
				1161.05	0.0162889	0.0456584	0.0257111
				1162.05	0.016278	0.0456475	0.025722
				1163.05	0.0162671	0.0456366	0.0257329
				1164.05	0.0162562	0.0456257	0.0257438
				1165.05	0.0162453	0.0456148	0.0257547
				1166.05	0.0162345	0.045604	0.0257656
				1167.05	0.0162236	0.0455931	0.0257764
				1168.05	0.0162127	0.0455822	0.0257873
				1169.05	0.0162019	0.0455714	0.0257981
				1170.05	0.0161911	0.0455606	0.0258089
				1171.05	0.0161802	0.0455498	0.0258198
				1172.05	0.0161694	0.0455389	0.0258306
				1173.05	0.0161586	0.0455281	0.0258414
				1174.05	0.0161478	0.0455173	0.0258522
				1175.05	0.0161371	0.0455066	0.0258629
				1176.05	0.0161263	0.0454958	0.0258737
				1177.05	0.0161155	0.045485	0.0258845
				1178.05	0.0161048	0.0454743	0.0258952
				1179.05	0.016094	0.0454635	0.025906
				1180.05	0.0160833	0.0454528	0.0259167
				1181.05	0.0160726	0.0454421	0.0259274
				1182.05	0.0160618	0.0454314	0.0259382
				1183.05	0.0160511	0.0454206	0.0259489
				1184.05	0.0160404	0.0454099	0.0259596
				1185.05	0.0160297	0.0453993	0.0259703
				1186.05	0.0160191	0.0453886	0.0259809
				1187.05	0.0160084	0.0453779	0.0259916
				1188.05	0.0159978	0.0453673	0.0260023
				1189.05	0.0159871	0.0453566	0.0260129
				1190.05	0.0159765	0.045346	0.0260235
				1191.05	0.0159658	0.0453354	0.0260342
				1192.05	0.0159552	0.0453247	0.0260448
				1193.05	0.0159446	0.0453141	0.0260554
				1194.05	0.015934	0.0453035	0.026066
				1195.05	0.0159234	0.0452929	0.0260766
				1196.05	0.0159128	0.0452823	0.0260872
				1197.05	0.0159023	0.0452718	0.0260977
				1198.05	0.0158917	0.0452612	0.0261083
				1199.05	0.0158812	0.0452507	0.0261188
				1200.05	0.0158706	0.0452401	0.0261294
				1201.05	0.0158601	0.0452296	0.0261399
				1202.05	0.0158496	0.0452191	0.0261504
				1203.05	0.015839	0.0452085	0.026161
				1204.05	0.0158285	0.045198	0.0261715
				1205.05	0.015818	0.0451875	0.026182
				1206.05	0.0158075	0.0451771	0.0261925
				1207.05	0.0157971	0.0451666	0.0262029
				1208.05	0.0157866	0.0451561	0.0262134
				1209.05	0.0157761	0.0451457	0.0262239
				1210.05	0.0157657	0.0451352	0.0262343
				1211.05	0.0157552	0.0451248	0.0262448
				1212.05	0.0157448	0.0451143	0.0262552
				1213.05	0.0157344	0.0451039	0.0262656
				1214.05	0.015724	0.0450935	0.026276
				1215.05	0.0157136	0.0450831	0.0262864
				1216.05	0.0157032	0.0450727	0.0262968
				1217.05	0.0156928	0.0450623	0.0263072
				1218.05	0.0156824	0.045052	0.0263176
				1219.05	0.0156721	0.0450416	0.0263279
				1220.05	0.0156617	0.0450312	0.0263383
				1221.05	0.0156514	0.0450209	0.0263486
				1222.05	0.015641	0.0450105	0.026359
				1223.05	0.0156307	0.0450002	0.0263693
				1224.05	0.0156204	0.0449899	0.0263796
				1225.05	0.0156101	0.0449796	0.0263899
				1226.05	0.0155998	0.0449693	0.0264002
				1227.05	0.0155895	0.044959	0.0264105
				1228.05	0.0155792	0.0449487	0.0264208
				1229.05	0.0155689	0.0449384	0.0264311
				1230.05	0.0155587	0.0449282	0.0264413
				1231.05	0.0155484	0.0449179	0.0264516
				1232.05	0.0155382	0.0449077	0.0264618
				1233.05	0.0155279	0.0448974	0.0264721
				1234.05	0.0155177	0.0448872	0.0264823
				1235.05	0.0155075	0.044877	0.0264925
				1236.05	0.0154973	0.0448668	0.0265027
				1237.05	0.0154871	0.0448566	0.0265129
				1238.05	0.0154769	0.0448464	0.0265231
				1239.05	0.0154667	0.0448362	0.0265333
				1240.05	0.0154565	0.044826	0.0265435
				1241.05	0.0154463	0.0448158	0.0265537
				1242.05	0.0154362	0.0448057	0.0265638
				1243.05	0.015426	0.0447956	0.026574
				1244.05	0.0154159	0.0447854	0.0265841
				1245.05	0.0154058	0.0447753	0.0265942
				1246.05	0.0153957	0.0447652	0.0266043
				1247.05	0.0153855	0.044755	0.0266145
				1248.05	0.0153754	0.0447449	0.0266246
				1249.05	0.0153653	0.0447349	0.0266347
				1250.05	0.0153553	0.0447248	0.0266447
				1251.05	0.0153452	0.0447147	0.0266548
				1252.05	0.0153351	0.0447046	0.0266649
				1253.05	0.0153251	0.0446946	0.0266749
				1254.05	0.015315	0.0446845	0.026685
				1255.05	0.015305	0.0446745	0.026695
				1256.05	0.0152949	0.0446645	0.0267051
				1257.05	0.0152849	0.0446544	0.0267151
				1258.05	0.0152749	0.0446444	0.0267251
				1259.05	0.0152649	0.0446344	0.0267351
				1260.05	0.0152549	0.0446244	0.0267451
				1261.05	0.0152449	0.0446144	0.0267551
				1262.05	0.0152349	0.0446044	0.0267651
				1263.05	0.015225	0.0445945	0.026775
				1264.05	0.015215	0.0445845	0.026785
				1265.05	0.015205	0.0445746	0.026795
				1266.05	0.0151951	0.0445646	0.0268049
				1267.05	0.0151852	0.0445547	0.0268148
				1268.05	0.0151752	0.0445448	0.0268248
				1269.05	0.0151653	0.0445348	0.0268347
				1270.05	0.0151554	0.0445249	0.0268446
				1271.05	0.0151455	0.044515	0.0268545
				1272.05	0.0151356	0.0445051	0.0268644
				1273.05	0.0151258	0.0444953	0.0268742
				1274.05	0.0151159	0.0444854	0.0268841
				1275.05	0.015106	0.0444755	0.026894
				1276.05	0.0150961	0.0444657	0.0269038
				1277.05	0.0150863	0.0444558	0.0269137
				1278.05	0.0150765	0.044446	0.0269235
				1279.05	0.0150666	0.0444361	0.0269334
				1280.05	0.0150568	0.0444263	0.0269432
				1281.05	0.015047	0.0444165	0.026953
				1282.05	0.0150372	0.0444067	0.0269628
				1283.05	0.0150274	0.0443969	0.0269726
				1284.05	0.0150176	0.0443871	0.0269824
				1285.05	0.0150078	0.0443773	0.0269922
				1286.05	0.0149981	0.0443676	0.027002
				1287.05	0.0149883	0.0443578	0.0270117
				1288.05	0.0149785	0.044348	0.0270215
				1289.05	0.0149688	0.0443383	0.0270312
				1290.05	0.014959	0.0443286	0.027041
				1291.05	0.0149493	0.0443188	0.0270507
				1292.05	0.0149396	0.0443091	0.0270604
				1293.05	0.0149299	0.0442994	0.0270701
				1294.05	0.0149202	0.0442897	0.0270798
				1295.05	0.0149105	0.04428	0.0270895
				1296.05	0.0149008	0.0442703	0.0270992
				1297.05	0.0148911	0.0442606	0.0271089
				1298.05	0.0148815	0.044251	0.0271185
				1299.05	0.0148718	0.0442413	0.0271282
				1300.05	0.0148621	0.0442317	0.0271379
				1301.05	0.0148525	0.044222	0.0271475
				1302.05	0.0148429	0.0442124	0.0271571
				1303.05	0.0148332	0.0442027	0.0271668
				1304.05	0.0148236	0.0441931	0.0271764
				1305.05	0.014814	0.0441835	0.027186
				1306.05	0.0148044	0.0441739	0.0271956
				1307.05	0.0147948	0.0441643	0.0272052
				1308.05	0.0147852	0.0441547	0.0272148
				1309.05	0.0147756	0.0441452	0.0272244
				1310.05	0.0147661	0.0441356	0.0272339
				1311.05	0.0147565	0.044126	0.0272435
				1312.05	0.014747	0.0441165	0.027253
				1313.05	0.0147374	0.0441069	0.0272626
				1314.05	0.0147279	0.0440974	0.0272721
				1315.05	0.0147183	0.0440879	0.0272817
				1316.05	0.0147088	0.0440783	0.0272912
				1317.05	0.0146993	0.0440688	0.0273007
				1318.05	0.0146898	0.0440593	0.0273102
				1319.05	0.0146803	0.0440498	0.0273197
				1320.05	0.0146708	0.0440403	0.0273292
				1321.05	0.0146614	0.0440309	0.0273386
				1322.05	0.0146519	0.0440214	0.0273481
				1323.05	0.0146424	0.0440119	0.0273576
				1324.05	0.014633	0.0440025	0.027367
				1325.05	0.0146235	0.043993	0.0273765
				1326.05	0.0146141	0.0439836	0.0273859
				1327.05	0.0146047	0.0439742	0.0273953
				1328.05	0.0145952	0.0439647	0.0274048
				1329.05	0.0145858	0.0439553	0.0274142
				1330.05	0.0145764	0.0439459	0.0274236
				1331.05	0.014567	0.0439365	0.027433
				1332.05	0.0145576	0.0439271	0.0274424
				1333.05	0.0145482	0.0439177	0.0274518
				1334.05	0.0145389	0.0439084	0.0274611
				1335.05	0.0145295	0.043899	0.0274705
				1336.05	0.0145201	0.0438897	0.0274799
				1337.05	0.0145108	0.0438803	0.0274892
				1338.05	0.0145014	0.043871	0.0274986
				1339.05	0.0144921	0.0438616	0.0275079
				1340.05	0.0144828	0.0438523	0.0275172
				1341.05	0.0144735	0.043843	0.0275265
				1342.05	0.0144642	0.0438337	0.0275358
				1343.05	0.0144548	0.0438244	0.0275452
				1344.05	0.0144456	0.0438151	0.0275544
				1345.05	0.0144363	0.0438058	0.0275637
				1346.05	0.014427	0.0437965	0.027573
				1347.05	0.0144177	0.0437872	0.0275823
				1348.05	0.0144085	0.043778	0.0275915
				1349.05	0.0143992	0.0437687	0.0276008
				1350.05	0.01439	0.0437595	0.02761
				1351.05	0.0143807	0.0437502	0.0276193
				1352.05	0.0143715	0.043741	0.0276285
				1353.05	0.0143623	0.0437318	0.0276377
				1354.05	0.014353	0.0437226	0.0276469
				1355.05	0.0143439	0.0437134	0.0276562
				1356.05	0.0143347	0.0437042	0.0276653
				1357.05	0.0143255	0.043695	0.0276745
				1358.05	0.0143163	0.0436858	0.0276837
				1359.05	0.0143071	0.0436766	0.0276929
				1360.05	0.0142979	0.0436674	0.0277021
				1361.05	0.0142888	0.0436583	0.0277112
				1362.05	0.0142796	0.0436491	0.0277204
				1363.05	0.0142705	0.04364	0.0277295
				1364.05	0.0142613	0.0436308	0.0277387
				1365.05	0.0142522	0.0436217	0.0277478
				1366.05	0.0142431	0.0436126	0.0277569
				1367.05	0.014234	0.0436035	0.027766
				1368.05	0.0142249	0.0435944	0.0277751
				1369.05	0.0142158	0.0435853	0.0277842
				1370.05	0.0142067	0.0435762	0.0277933
				1371.05	0.0141976	0.0435671	0.0278024
				1372.05	0.0141885	0.043558	0.0278115
				1373.05	0.0141794	0.043549	0.0278205
				1374.05	0.0141704	0.0435399	0.0278296
				1375.05	0.0141613	0.0435309	0.0278387
				1376.05	0.0141523	0.0435218	0.0278477
				1377.05	0.0141433	0.0435128	0.0278567
				1378.05	0.0141342	0.0435037	0.0278658
				1379.05	0.0141252	0.0434947	0.0278748
				1380.05	0.0141162	0.0434857	0.0278838
				1381.05	0.0141072	0.0434767	0.0278928
				1382.05	0.0140982	0.0434677	0.0279018
				1383.05	0.0140892	0.0434587	0.0279108
				1384.05	0.0140802	0.0434497	0.0279198
				1385.05	0.0140712	0.0434408	0.0279288
				1386.05	0.0140623	0.0434318	0.0279377
				1387.05	0.0140533	0.0434228	0.0279467
				1388.05	0.0140444	0.0434139	0.0279556
				1389.05	0.0140354	0.0434049	0.0279646
				1390.05	0.0140265	0.043396	0.0279735
				1391.05	0.0140175	0.0433871	0.0279825
				1392.05	0.0140086	0.0433781	0.0279914
				1393.05	0.0139997	0.0433692	0.0280003
				1394.05	0.0139908	0.0433603	0.0280092
				1395.05	0.0139819	0.0433514	0.0280181
				1396.05	0.013973	0.0433425	0.028027
				1397.05	0.0139641	0.0433336	0.0280359
				1398.05	0.0139552	0.0433248	0.0280448
				1399.05	0.0139464	0.0433159	0.0280536
				1400.05	0.0139375	0.043307	0.0280625
				1401.05	0.0139287	0.0432982	0.0280713
				1402.05	0.0139198	0.0432893	0.0280802
				1403.05	0.013911	0.0432805	0.028089
				1404.05	0.0139021	0.0432716	0.0280979
				1405.05	0.0138933	0.0432628	0.0281067
				1406.05	0.0138845	0.043254	0.0281155
				1407.05	0.0138757	0.0432452	0.0281243
				1408.05	0.0138669	0.0432364	0.0281331
				1409.05	0.0138581	0.0432276	0.0281419
				1410.05	0.0138493	0.0432188	0.0281507
				1411.05	0.0138405	0.04321	0.0281595
				1412.05	0.0138317	0.0432012	0.0281683
				1413.05	0.013823	0.0431925	0.028177
				1414.05	0.0138142	0.0431837	0.0281858
				1415.05	0.0138055	0.043175	0.0281945
				1416.05	0.0137967	0.0431662	0.0282033
				1417.05	0.013788	0.0431575	0.028212
				1418.05	0.0137792	0.0431487	0.0282208
				1419.05	0.0137705	0.04314	0.0282295
				1420.05	0.0137618	0.0431313	0.0282382
				1421.05	0.0137531	0.0431226	0.0282469
				1422.05	0.0137444	0.0431139	0.0282556
				1423.05	0.0137357	0.0431052	0.0282643
				1424.05	0.013727	0.0430965	0.028273
				1425.05	0.0137183	0.0430878	0.0282817
				1426.05	0.0137097	0.0430792	0.0282903
				1427.05	0.013701	0.0430705	0.028299
				1428.05	0.0136923	0.0430618	0.0283077
				1429.05	0.0136837	0.0430532	0.0283163
				1430.05	0.013675	0.0430446	0.028325
				1431.05	0.0136664	0.0430359	0.0283336
				1432.05	0.0136578	0.0430273	0.0283422
				1433.05	0.0136492	0.0430187	0.0283509
				1434.05	0.0136405	0.0430101	0.0283595
				1435.05	0.0136319	0.0430014	0.0283681
				1436.05	0.0136233	0.0429928	0.0283767
				1437.05	0.0136147	0.0429843	0.0283853
				1438.05	0.0136061	0.0429757	0.0283939
				1439.05	0.0135976	0.0429671	0.0284024
				1440.05	0.013589	0.0429585	0.028411
				1441.05	0.0135804	0.04295	0.0284196
				1442.05	0.0135719	0.0429414	0.0284281
				1443.05	0.0135633	0.0429328	0.0284367
				1444.05	0.0135548	0.0429243	0.0284452
				1445.05	0.0135462	0.0429158	0.0284537
				1446.05	0.0135377	0.0429072	0.0284623
				1447.05	0.0135292	0.0428987	0.0284708
				1448.05	0.0135207	0.0428902	0.0284793
				1449.05	0.0135122	0.0428817	0.0284878
				1450.05	0.0135037	0.0428732	0.0284963
				1451.05	0.0134952	0.0428647	0.0285048
				1452.05	0.0134867	0.0428562	0.0285133
				1453.05	0.0134782	0.0428477	0.0285218
				1454.05	0.0134697	0.0428393	0.0285303
				1455.05	0.0134613	0.0428308	0.0285387
				1456.05	0.0134528	0.0428223	0.0285472
				1457.05	0.0134444	0.0428139	0.0285556
				1458.05	0.0134359	0.0428054	0.0285641
				1459.05	0.0134275	0.042797	0.0285725
				1460.05	0.013419	0.0427886	0.028581
				1461.05	0.0134106	0.0427801	0.0285894
				1462.05	0.0134022	0.0427717	0.0285978
				1463.05	0.0133938	0.0427633	0.0286062
				1464.05	0.0133854	0.0427549	0.0286146
				1465.05	0.013377	0.0427465	0.028623
				1466.05	0.0133686	0.0427381	0.0286314
				1467.05	0.0133602	0.0427297	0.0286398
				1468.05	0.0133518	0.0427214	0.0286482
				1469.05	0.0133435	0.042713	0.0286565
				1470.05	0.0133351	0.0427046	0.0286649
				1471.05	0.0133268	0.0426963	0.0286732
				1472.05	0.0133184	0.0426879	0.0286816
				1473.05	0.0133101	0.0426796	0.0286899
				1474.05	0.0133017	0.0426713	0.0286983
				1475.05	0.0132934	0.0426629	0.0287066
				1476.05	0.0132851	0.0426546	0.0287149
				1477.05	0.0132768	0.0426463	0.0287232
				1478.05	0.0132685	0.042638	0.0287315
				1479.05	0.0132602	0.0426297	0.0287398
				1480.05	0.0132519	0.0426214	0.0287481
				1481.05	0.0132436	0.0426131	0.0287564
				1482.05	0.0132353	0.0426048	0.0287647
				1483.05	0.013227	0.0425965	0.028773
				1484.05	0.0132188	0.0425883	0.0287812
				1485.05	0.0132105	0.04258	0.0287895
				1486.05	0.0132023	0.0425718	0.0287978
				1487.05	0.013194	0.0425635	0.028806
				1488.05	0.0131858	0.0425553	0.0288142
				1489.05	0.0131775	0.0425471	0.0288225
				1490.05	0.0131693	0.0425388	0.0288307
				1491.05	0.0131611	0.0425306	0.0288389
				1492.05	0.0131529	0.0425224	0.0288471
				1493.05	0.0131447	0.0425142	0.0288553
				1494.05	0.0131365	0.042506	0.0288635
				1495.05	0.0131283	0.0424978	0.0288717
				1496.05	0.0131201	0.0424896	0.0288799
				1497.05	0.0131119	0.0424814	0.0288881
				1498.05	0.0131037	0.0424732	0.0288963
				1499.05	0.0130956	0.0424651	0.0289044
				1500.05	0.0130874	0.0424569	0.0289126
				1501.05	0.0130793	0.0424488	0.0289207
				1502.05	0.0130711	0.0424406	0.0289289
				1503.05	0.013063	0.0424325	0.028937
				1504.05	0.0130548	0.0424244	0.0289451
				1505.05	0.0130467	0.0424162	0.0289533
				1506.05	0.0130386	0.0424081	0.0289614
				1507.05	0.0130305	0.0424	0.0289695
				1508.05	0.0130224	0.0423919	0.0289776
				1509.05	0.0130143	0.0423838	0.0289857
				1510.05	0.0130062	0.0423757	0.0289938
				1511.05	0.0129981	0.0423676	0.0290019
				1512.05	0.01299	0.0423595	0.02901
				1513.05	0.012982	0.0423515	0.0290181
				1514.05	0.0129739	0.0423434	0.0290261
				1515.05	0.0129658	0.0423353	0.0290342
				1516.05	0.0129578	0.0423273	0.0290422
				1517.05	0.0129497	0.0423192	0.0290503
				1518.05	0.0129417	0.0423112	0.0290583
				1519.05	0.0129336	0.0423032	0.0290664
				1520.05	0.0129256	0.0422951	0.0290744
				1521.05	0.0129176	0.0422871	0.0290824
				1522.05	0.0129096	0.0422791	0.0290904
				1523.05	0.0129016	0.0422711	0.0290984
				1524.05	0.0128936	0.0422631	0.0291064
				1525.05	0.0128856	0.0422551	0.0291144
				1526.05	0.0128776	0.0422471	0.0291224
				1527.05	0.0128696	0.0422391	0.0291304
				1528.05	0.0128616	0.0422312	0.0291384
				1529.05	0.0128537	0.0422232	0.0291463
				1530.05	0.0128457	0.0422152	0.0291543
				1531.05	0.0128378	0.0422073	0.0291623
				1532.05	0.0128298	0.0421993	0.0291702
				1533.05	0.0128218	0.0421914	0.0291781
				1534.05	0.0128139	0.0421834	0.0291861
				1535.05	0.012806	0.0421755	0.029194
				1536.05	0.0127981	0.0421676	0.0292019
				1537.05	0.0127901	0.0421597	0.0292099
				1538.05	0.0127822	0.0421518	0.0292178
				1539.05	0.0127743	0.0421438	0.0292257
				1540.05	0.0127664	0.0421359	0.0292336
				1541.05	0.0127585	0.0421281	0.0292415
				1542.05	0.0127507	0.0421202	0.0292494
				1543.05	0.0127428	0.0421123	0.0292572
				1544.05	0.0127349	0.0421044	0.0292651
				1545.05	0.012727	0.0420965	0.029273
				1546.05	0.0127192	0.0420887	0.0292808
				1547.05	0.0127113	0.0420808	0.0292887
				1548.05	0.0127035	0.042073	0.0292965
				1549.05	0.0126956	0.0420651	0.0293044
				1550.05	0.0126878	0.0420573	0.0293122
				1551.05	0.01268	0.0420495	0.02932
				1552.05	0.0126721	0.0420416	0.0293279
				1553.05	0.0126643	0.0420338	0.0293357
				1554.05	0.0126565	0.042026	0.0293435
				1555.05	0.0126487	0.0420182	0.0293513
				1556.05	0.0126409	0.0420104	0.0293591
				1557.05	0.0126331	0.0420026	0.0293669
				1558.05	0.0126253	0.0419949	0.0293747
				1559.05	0.0126176	0.0419871	0.0293824
				1560.05	0.0126098	0.0419793	0.0293902
				1561.05	0.012602	0.0419715	0.029398
				1562.05	0.0125943	0.0419638	0.0294057
				1563.05	0.0125865	0.041956	0.0294135
				1564.05	0.0125787	0.0419483	0.0294212
				1565.05	0.012571	0.0419405	0.029429
				1566.05	0.0125633	0.0419328	0.0294367
				1567.05	0.0125556	0.0419251	0.0294445
				1568.05	0.0125478	0.0419173	0.0294522
				1569.05	0.0125401	0.0419096	0.0294599
				1570.05	0.0125324	0.0419019	0.0294676
				1571.05	0.0125247	0.0418942	0.0294753
				1572.05	0.012517	0.0418865	0.029483
				1573.05	0.0125093	0.0418788	0.0294907
				1574.05	0.0125016	0.0418711	0.0294984
				1575.05	0.0124939	0.0418635	0.0295061
				1576.05	0.0124863	0.0418558	0.0295137
				1577.05	0.0124786	0.0418481	0.0295214
				1578.05	0.0124709	0.0418404	0.0295291
				1579.05	0.0124633	0.0418328	0.0295367
				1580.05	0.0124556	0.0418251	0.0295444
				1581.05	0.012448	0.0418175	0.029552
				1582.05	0.0124403	0.0418099	0.0295597
				1583.05	0.0124327	0.0418022	0.0295673
				1584.05	0.0124251	0.0417946	0.0295749
				1585.05	0.0124175	0.041787	0.0295825
				1586.05	0.0124099	0.0417794	0.0295901
				1587.05	0.0124023	0.0417718	0.0295977
				1588.05	0.0123947	0.0417642	0.0296053
				1589.05	0.0123871	0.0417566	0.0296129
				1590.05	0.0123795	0.041749	0.0296205
				1591.05	0.0123719	0.0417414	0.0296281
				1592.05	0.0123643	0.0417338	0.0296357
				1593.05	0.0123567	0.0417262	0.0296433
				1594.05	0.0123492	0.0417187	0.0296508
				1595.05	0.0123416	0.0417111	0.0296584
				1596.05	0.0123341	0.0417036	0.0296659
				1597.05	0.0123265	0.041696	0.0296735
				1598.05	0.012319	0.0416885	0.029681
				1599.05	0.0123114	0.041681	0.0296886
				1600.05	0.0123039	0.0416734	0.0296961
				1601.05	0.0122964	0.0416659	0.0297036
				1602.05	0.0122889	0.0416584	0.0297111
				1603.05	0.0122813	0.0416509	0.0297186
				1604.05	0.0122738	0.0416434	0.0297261
				1605.05	0.0122664	0.0416359	0.0297337
				1606.05	0.0122589	0.0416284	0.0297411
				1607.05	0.0122514	0.0416209	0.0297486
				1608.05	0.0122439	0.0416134	0.0297561
				1609.05	0.0122364	0.0416059	0.0297636
				1610.05	0.0122289	0.0415985	0.0297711
				1611.05	0.0122215	0.041591	0.0297785
				1612.05	0.012214	0.0415835	0.029786
				1613.05	0.0122066	0.0415761	0.0297934
				1614.05	0.0121991	0.0415686	0.0298009
				1615.05	0.0121917	0.0415612	0.0298083
				1616.05	0.0121843	0.0415538	0.0298157
				1617.05	0.0121768	0.0415463	0.0298232
				1618.05	0.0121694	0.0415389	0.0298306
				1619.05	0.012162	0.0415315	0.029838
				1620.05	0.0121546	0.0415241	0.0298454
				1621.05	0.0121472	0.0415167	0.0298528
				1622.05	0.0121398	0.0415093	0.0298602
				1623.05	0.0121324	0.0415019	0.0298676
				1624.05	0.012125	0.0414945	0.029875
				1625.05	0.0121176	0.0414871	0.0298824
				1626.05	0.0121102	0.0414797	0.0298898
				1627.05	0.0121029	0.0414724	0.0298971
				1628.05	0.0120955	0.041465	0.0299045
				1629.05	0.0120881	0.0414576	0.0299119
				1630.05	0.0120808	0.0414503	0.0299192
				1631.05	0.0120734	0.0414429	0.0299266
				1632.05	0.0120661	0.0414356	0.0299339
				1633.05	0.0120588	0.0414283	0.0299412
				1634.05	0.0120514	0.0414209	0.0299486
				1635.05	0.0120441	0.0414136	0.0299559
				1636.05	0.0120368	0.0414063	0.0299632
				1637.05	0.0120295	0.041399	0.0299705
				1638.05	0.0120222	0.0413917	0.0299778
				1639.05	0.0120149	0.0413844	0.0299851
				1640.05	0.0120076	0.0413771	0.0299924
				1641.05	0.0120003	0.0413698	0.0299997
				1642.05	0.011993	0.0413625	0.030007
				1643.05	0.0119857	0.0413552	0.0300143
				1644.05	0.0119784	0.041348	0.0300216
				1645.05	0.0119712	0.0413407	0.0300288
				1646.05	0.0119639	0.0413334	0.0300361
				1647.05	0.0119567	0.0413262	0.0300433
				1648.05	0.0119494	0.0413189	0.0300506
				1649.05	0.0119422	0.0413117	0.0300578
				1650.05	0.0119349	0.0413044	0.0300651
				1651.05	0.0119277	0.0412972	0.0300723
				1652.05	0.0119205	0.04129	0.0300795
				1653.05	0.0119133	0.0412828	0.0300867
				1654.05	0.011906	0.0412756	0.030094
				1655.05	0.0118988	0.0412683	0.0301012
				1656.05	0.0118916	0.0412611	0.0301084
				1657.05	0.0118844	0.0412539	0.0301156
				1658.05	0.0118772	0.0412467	0.0301228
				1659.05	0.01187	0.0412395	0.03013
				1660.05	0.0118629	0.0412324	0.0301371
				1661.05	0.0118557	0.0412252	0.0301443
				1662.05	0.0118485	0.041218	0.0301515
				1663.05	0.0118413	0.0412109	0.0301587
				1664.05	0.0118342	0.0412037	0.0301658
				1665.05	0.011827	0.0411965	0.030173
				1666.05	0.0118199	0.0411894	0.0301801
				1667.05	0.0118127	0.0411822	0.0301873
				1668.05	0.0118056	0.0411751	0.0301944
				1669.05	0.0117985	0.041168	0.0302015
				1670.05	0.0117913	0.0411608	0.0302087
				1671.05	0.0117842	0.0411537	0.0302158
				1672.05	0.0117771	0.0411466	0.0302229
				1673.05	0.01177	0.0411395	0.03023
				1674.05	0.0117629	0.0411324	0.0302371
				1675.05	0.0117558	0.0411253	0.0302442
				1676.05	0.0117487	0.0411182	0.0302513
				1677.05	0.0117416	0.0411111	0.0302584
				1678.05	0.0117345	0.041104	0.0302655
				1679.05	0.0117275	0.041097	0.0302725
				1680.05	0.0117204	0.0410899	0.0302796
				1681.05	0.0117133	0.0410828	0.0302867
				1682.05	0.0117062	0.0410758	0.0302938
				1683.05	0.0116992	0.0410687	0.0303008
				1684.05	0.0116922	0.0410617	0.0303079
				1685.05	0.0116851	0.0410546	0.0303149
				1686.05	0.0116781	0.0410476	0.0303219
				1687.05	0.011671	0.0410406	0.030329
				1688.05	0.011664	0.0410335	0.030336
				1689.05	0.011657	0.0410265	0.030343
				1690.05	0.01165	0.0410195	0.03035
				1691.05	0.0116429	0.0410125	0.0303571
				1692.05	0.011636	0.0410055	0.0303641
				1693.05	0.011629	0.0409985	0.0303711
				1694.05	0.011622	0.0409915	0.0303781
				1695.05	0.011615	0.0409845	0.030385
				1696.05	0.011608	0.0409775	0.030392
				1697.05	0.011601	0.0409705	0.030399
				1698.05	0.011594	0.0409635	0.030406
				1699.05	0.0115871	0.0409566	0.0304129
				1700.05	0.0115801	0.0409496	0.0304199
				1701.05	0.0115731	0.0409426	0.0304269
				1702.05	0.0115662	0.0409357	0.0304338
				1703.05	0.0115592	0.0409287	0.0304408
				1704.05	0.0115523	0.0409218	0.0304477
				1705.05	0.0115454	0.0409149	0.0304546
				1706.05	0.0115384	0.0409079	0.0304616
				1707.05	0.0115315	0.040901	0.0304685
				1708.05	0.0115246	0.0408941	0.0304754
				1709.05	0.0115177	0.0408872	0.0304823
				1710.05	0.0115108	0.0408803	0.0304892
				1711.05	0.0115039	0.0408734	0.0304961
				1712.05	0.011497	0.0408665	0.030503
				1713.05	0.0114901	0.0408596	0.0305099
				1714.05	0.0114832	0.0408527	0.0305168
				1715.05	0.0114763	0.0408458	0.0305237
				1716.05	0.0114694	0.0408389	0.0305306
				1717.05	0.0114625	0.0408321	0.0305375
				1718.05	0.0114557	0.0408252	0.0305443
				1719.05	0.0114488	0.0408183	0.0305512
				1720.05	0.011442	0.0408115	0.030558
				1721.05	0.0114351	0.0408046	0.0305649
				1722.05	0.0114283	0.0407978	0.0305717
				1723.05	0.0114214	0.0407909	0.0305786
				1724.05	0.0114146	0.0407841	0.0305854
				1725.05	0.0114077	0.0407773	0.0305923
				1726.05	0.0114009	0.0407704	0.0305991
				1727.05	0.0113941	0.0407636	0.0306059
				1728.05	0.0113873	0.0407568	0.0306127
				1729.05	0.0113805	0.04075	0.0306195
				1730.05	0.0113737	0.0407432	0.0306263
				1731.05	0.0113669	0.0407364	0.0306331
				1732.05	0.0113601	0.0407296	0.0306399
				1733.05	0.0113533	0.0407228	0.0306467
				1734.05	0.0113465	0.040716	0.0306535
				1735.05	0.0113397	0.0407093	0.0306603
				1736.05	0.011333	0.0407025	0.030667
				1737.05	0.0113262	0.0406957	0.0306738
				1738.05	0.0113194	0.0406889	0.0306806
				1739.05	0.0113127	0.0406822	0.0306873
				1740.05	0.0113059	0.0406754	0.0306941
				1741.05	0.0112992	0.0406687	0.0307008
				1742.05	0.0112924	0.040662	0.0307076
				1743.05	0.0112857	0.0406552	0.0307143
				1744.05	0.011279	0.0406485	0.030721
				1745.05	0.0112722	0.0406417	0.0307278
				1746.05	0.0112655	0.040635	0.0307345
				1747.05	0.0112588	0.0406283	0.0307412
				1748.05	0.0112521	0.0406216	0.0307479
				1749.05	0.0112454	0.0406149	0.0307546
				1750.05	0.0112387	0.0406082	0.0307613
				1751.05	0.011232	0.0406015	0.030768
				1752.05	0.0112253	0.0405948	0.0307747
				1753.05	0.0112186	0.0405881	0.0307814
				1754.05	0.0112119	0.0405814	0.0307881
				1755.05	0.0112052	0.0405748	0.0307947
				1756.05	0.0111986	0.0405681	0.0308014
				1757.05	0.0111919	0.0405614	0.0308081
				1758.05	0.0111853	0.0405548	0.0308147
				1759.05	0.0111786	0.0405481	0.0308214
				1760.05	0.0111719	0.0405415	0.030828
				1761.05	0.0111653	0.0405348	0.0308347
				1762.05	0.0111587	0.0405282	0.0308413
				1763.05	0.011152	0.0405215	0.030848
				1764.05	0.0111454	0.0405149	0.0308546
				1765.05	0.0111388	0.0405083	0.0308612
				1766.05	0.0111322	0.0405017	0.0308678
				1767.05	0.0111255	0.040495	0.0308745
				1768.05	0.0111189	0.0404884	0.0308811
				1769.05	0.0111123	0.0404818	0.0308877
				1770.05	0.0111057	0.0404752	0.0308943
				1771.05	0.0110991	0.0404686	0.0309009
				1772.05	0.0110925	0.040462	0.0309075
				1773.05	0.011086	0.0404555	0.030914
				1774.05	0.0110794	0.0404489	0.0309206
				1775.05	0.0110728	0.0404423	0.0309272
				1776.05	0.0110662	0.0404357	0.0309338
				1777.05	0.0110597	0.0404292	0.0309403
				1778.05	0.0110531	0.0404226	0.0309469
				1779.05	0.0110465	0.0404161	0.0309535
				1780.05	0.01104	0.0404095	0.03096
				1781.05	0.0110335	0.040403	0.0309665
				1782.05	0.0110269	0.0403964	0.0309731
				1783.05	0.0110204	0.0403899	0.0309796
				1784.05	0.0110138	0.0403833	0.0309862
				1785.05	0.0110073	0.0403768	0.0309927
				1786.05	0.0110008	0.0403703	0.0309992
				1787.05	0.0109943	0.0403638	0.0310057
				1788.05	0.0109878	0.0403573	0.0310122
				1789.05	0.0109813	0.0403508	0.0310187
				1790.05	0.0109748	0.0403443	0.0310252
				1791.05	0.0109683	0.0403378	0.0310317
				1792.05	0.0109618	0.0403313	0.0310382
				1793.05	0.0109553	0.0403248	0.0310447
				1794.05	0.0109488	0.0403183	0.0310512
				1795.05	0.0109423	0.0403118	0.0310577
				1796.05	0.0109359	0.0403054	0.0310641
				1797.05	0.0109294	0.0402989	0.0310706
				1798.05	0.0109229	0.0402924	0.0310771
				1799.05	0.0109165	0.040286	0.0310835
				1800.05	0.01091	0.0402795	0.03109
				1801.05	0.0109036	0.0402731	0.0310964
				1802.05	0.0108971	0.0402666	0.0311029
				1803.05	0.0108907	0.0402602	0.0311093
				1804.05	0.0108842	0.0402538	0.0311158
				1805.05	0.0108778	0.0402473	0.0311222
				1806.05	0.0108714	0.0402409	0.0311286
				1807.05	0.010865	0.0402345	0.031135
				1808.05	0.0108586	0.0402281	0.0311414
				1809.05	0.0108522	0.0402217	0.0311478
				1810.05	0.0108457	0.0402153	0.0311543
				1811.05	0.0108393	0.0402089	0.0311607
				1812.05	0.010833	0.0402025	0.031167
				1813.05	0.0108266	0.0401961	0.0311734
				1814.05	0.0108202	0.0401897	0.0311798
				1815.05	0.0108138	0.0401833	0.0311862
				1816.05	0.0108074	0.0401769	0.0311926
				1817.05	0.0108011	0.0401706	0.0311989
				1818.05	0.0107947	0.0401642	0.0312053
				1819.05	0.0107883	0.0401578	0.0312117
				1820.05	0.010782	0.0401515	0.031218
				1821.05	0.0107756	0.0401451	0.0312244
				1822.05	0.0107693	0.0401388	0.0312307
				1823.05	0.0107629	0.0401324	0.0312371
				1824.05	0.0107566	0.0401261	0.0312434
				1825.05	0.0107503	0.0401198	0.0312497
				1826.05	0.0107439	0.0401135	0.0312561
				1827.05	0.0107376	0.0401071	0.0312624
				1828.05	0.0107313	0.0401008	0.0312687
				1829.05	0.010725	0.0400945	0.031275
				1830.05	0.0107187	0.0400882	0.0312813
				1831.05	0.0107124	0.0400819	0.0312876
				1832.05	0.0107061	0.0400756	0.0312939
				1833.05	0.0106998	0.0400693	0.0313002
				1834.05	0.0106935	0.040063	0.0313065
				1835.05	0.0106872	0.0400567	0.0313128
				1836.05	0.0106809	0.0400504	0.0313191
				1837.05	0.0106746	0.0400442	0.0313254
				1838.05	0.0106684	0.0400379	0.0313316
				1839.05	0.0106621	0.0400316	0.0313379
				1840.05	0.0106558	0.0400254	0.0313442
				1841.05	0.0106496	0.0400191	0.0313504
				1842.05	0.0106433	0.0400128	0.0313567
				1843.05	0.0106371	0.0400066	0.0313629
				1844.05	0.0106308	0.0400003	0.0313692
				1845.05	0.0106246	0.0399941	0.0313754
				1846.05	0.0106184	0.0399879	0.0313816
				1847.05	0.0106121	0.0399816	0.0313879
				1848.05	0.0106059	0.0399754	0.0313941
				1849.05	0.0105997	0.0399692	0.0314003
				1850.05	0.0105935	0.039963	0.0314065
				1851.05	0.0105872	0.0399568	0.0314128
				1852.05	0.010581	0.0399506	0.031419
				1853.05	0.0105748	0.0399444	0.0314252
				1854.05	0.0105687	0.0399382	0.0314313
				1855.05	0.0105624	0.039932	0.0314376
				1856.05	0.0105563	0.0399258	0.0314437
				1857.05	0.0105501	0.0399196	0.0314499
				1858.05	0.0105439	0.0399134	0.0314561
				1859.05	0.0105377	0.0399072	0.0314623
				1860.05	0.0105316	0.0399011	0.0314684
				1861.05	0.0105254	0.0398949	0.0314746
				1862.05	0.0105192	0.0398887	0.0314808
				1863.05	0.0105131	0.0398826	0.0314869
				1864.05	0.0105069	0.0398764	0.0314931
				1865.05	0.0105008	0.0398703	0.0314992
				1866.05	0.0104946	0.0398641	0.0315054
				1867.05	0.0104885	0.039858	0.0315115
				1868.05	0.0104824	0.0398519	0.0315176
				1869.05	0.0104762	0.0398457	0.0315238
				1870.05	0.0104701	0.0398396	0.0315299
				1871.05	0.010464	0.0398335	0.031536
				1872.05	0.0104579	0.0398274	0.0315421
				1873.05	0.0104518	0.0398213	0.0315482
				1874.05	0.0104457	0.0398152	0.0315544
				1875.05	0.0104396	0.0398091	0.0315604
				1876.05	0.0104335	0.039803	0.0315665
				1877.05	0.0104274	0.0397969	0.0315726
				1878.05	0.0104213	0.0397908	0.0315787
				1879.05	0.0104152	0.0397847	0.0315848
				1880.05	0.0104091	0.0397786	0.0315909
				1881.05	0.010403	0.0397725	0.031597
				1882.05	0.010397	0.0397665	0.031603
				1883.05	0.0103909	0.0397604	0.0316091
				1884.05	0.0103848	0.0397543	0.0316152
				1885.05	0.0103788	0.0397483	0.0316212
				1886.05	0.0103727	0.0397422	0.0316273
				1887.05	0.0103667	0.0397362	0.0316333
				1888.05	0.0103606	0.0397301	0.0316394
				1889.05	0.0103546	0.0397241	0.0316454
				1890.05	0.0103485	0.0397181	0.0316514
				1891.05	0.0103425	0.039712	0.0316575
				1892.05	0.0103365	0.039706	0.0316635
				1893.05	0.0103305	0.0397	0.0316695
				1894.05	0.0103245	0.039694	0.0316755
				1895.05	0.0103184	0.039688	0.0316816
				1896.05	0.0103124	0.039682	0.0316876
				1897.05	0.0103064	0.0396759	0.0316936
				1898.05	0.0103004	0.0396699	0.0316996
				1899.05	0.0102944	0.039664	0.0317056
				1900.05	0.0102884	0.039658	0.0317115
				1901.05	0.0102825	0.039652	0.0317175
				1902.05	0.0102765	0.039646	0.0317235
				1903.05	0.0102705	0.03964	0.0317295
				1904.05	0.0102645	0.039634	0.0317355
				1905.05	0.0102586	0.0396281	0.0317414
				1906.05	0.0102526	0.0396221	0.0317474
				1907.05	0.0102466	0.0396161	0.0317534
				1908.05	0.0102407	0.0396102	0.0317593
				1909.05	0.0102347	0.0396042	0.0317653
				1910.05	0.0102288	0.0395983	0.0317712
				1911.05	0.0102228	0.0395923	0.0317772
				1912.05	0.0102169	0.0395864	0.0317831
				1913.05	0.010211	0.0395805	0.031789
				1914.05	0.010205	0.0395745	0.031795
				1915.05	0.0101991	0.0395686	0.0318009
				1916.05	0.0101932	0.0395627	0.0318068
				1917.05	0.0101873	0.0395568	0.0318127
				1918.05	0.0101814	0.0395509	0.0318186
				1919.05	0.0101755	0.039545	0.0318246
				1920.05	0.0101695	0.0395391	0.0318305
				1921.05	0.0101636	0.0395332	0.0318364
				1922.05	0.0101578	0.0395273	0.0318423
				1923.05	0.0101519	0.0395214	0.0318481
				1924.05	0.010146	0.0395155	0.031854
				1925.05	0.0101401	0.0395096	0.0318599
				1926.05	0.0101342	0.0395037	0.0318658
				1927.05	0.0101283	0.0394979	0.0318717
				1928.05	0.0101225	0.039492	0.0318775
				1929.05	0.0101166	0.0394861	0.0318834
				1930.05	0.0101107	0.0394803	0.0318893
				1931.05	0.0101049	0.0394744	0.0318951
				1932.05	0.010099	0.0394685	0.031901
				1933.05	0.0100932	0.0394627	0.0319068
				1934.05	0.0100873	0.0394569	0.0319127
				1935.05	0.0100815	0.039451	0.0319185
				1936.05	0.0100757	0.0394452	0.0319243
				1937.05	0.0100698	0.0394393	0.0319302
				1938.05	0.010064	0.0394335	0.031936
				1939.05	0.0100582	0.0394277	0.0319418
				1940.05	0.0100524	0.0394219	0.0319476
				1941.05	0.0100465	0.0394161	0.0319535
				1942.05	0.0100407	0.0394103	0.0319593
				1943.05	0.0100349	0.0394044	0.0319651
				1944.05	0.0100291	0.0393986	0.0319709
				1945.05	0.0100233	0.0393928	0.0319767
				1946.05	0.0100175	0.039387	0.0319825
				1947.05	0.0100117	0.0393813	0.0319883
				1948.05	0.010006	0.0393755	0.031994
				1949.05	0.0100002	0.0393697	0.0319998
				1950.05	0.00999441	0.0393639	0.0320056
				1951.05	0.00998863	0.0393582	0.0320114
				1952.05	0.00998287	0.0393524	0.0320171
				1953.05	0.0099771	0.0393466	0.0320229
				1954.05	0.00997134	0.0393408	0.0320287
				1955.05	0.00996559	0.0393351	0.0320344
				1956.05	0.00995984	0.0393293	0.0320402
				1957.05	0.00995409	0.0393236	0.0320459
				1958.05	0.00994834	0.0393179	0.0320517
				1959.05	0.00994261	0.0393121	0.0320574
				1960.05	0.00993687	0.0393064	0.0320631
				1961.05	0.00993114	0.0393006	0.0320689
				1962.05	0.00992541	0.0392949	0.0320746
				1963.05	0.00991969	0.0392892	0.0320803
				1964.05	0.00991397	0.0392835	0.032086
				1965.05	0.00990826	0.0392778	0.0320917
				1966.05	0.00990255	0.0392721	0.0320974
				1967.05	0.00989684	0.0392663	0.0321032
				1968.05	0.00989114	0.0392607	0.0321089
				1969.05	0.00988544	0.0392549	0.0321146
				1970.05	0.00987975	0.0392493	0.0321203
				1971.05	0.00987406	0.0392436	0.0321259
				1972.05	0.00986837	0.0392379	0.0321316
				1973.05	0.00986269	0.0392322	0.0321373
				1974.05	0.00985701	0.0392265	0.032143
				1975.05	0.00985134	0.0392209	0.0321487
				1976.05	0.00984567	0.0392152	0.0321543
[truncated: 7,024 more rows]

## Sheet: DABCO_1.5BuI_AcN_50.9C
Measured and fit concentrations (molar) vs. time (seconds) for the reaction 1 DABCO + 1.5 BuI ® Bu-DABCO-I in acetonitrile-d3 at 50.9 C.
The fit of the data was performed using a kinetic model of the reaction with the Berkeley-Madonna program.
										Berkeley-Madonna Model
TIME_MEAS_1	DABCO_MEAS	BuI_MEAS	TIME_MEAS_2	BuDABCOI_MEAS	TIME_FIT	DABCO_FIT	BuI_FIT	BuDABCOI_FIT		METHOD STIFF
0	0.0461	0.0818	0	0	0	0.047	0.0981694	0
169.72	0.0279	0.0795	1	0.00075	1e-06	0.047	0.0981694	0
254.07	0.0233	0.0758	85.36	0.0105	3e-06	0.047	0.0981694	0		STARTTIME = 0
338.43	0.0193	0.0713	169.72	0.0173	7e-06	0.047	0.0981694	0		STOPTIME = 3000
422.79	0.0163	0.069	254.07	0.0225	1.5e-05	0.047	0.0981694	0		DT = 0.02
507.15	0.0137	0.0653	338.43	0.0263	3.1e-05	0.047	0.0981694	0
591.5	0.0116	0.0638	422.79	0.03	6.3e-05	0.047	0.0981694	1e-08		{RXN1: DABCO + 2 BuI --> BuDABCOI + BuI}
675.86	0.00994	0.0615	507.15	0.0315	0.000127	0.047	0.0981694	2e-08		{RXN2: BuDABCOI + BuI --> Bu2DABCOI2}
760.22	0.00844	0.0608	591.5	0.0338	0.000255	0.047	0.0981694	4e-08
844.58	0.00731	0.0593	675.86	0.036	0.000511	0.0469999	0.0981693	7e-08		RXN1 = K1f*DABCO*BuI - K1r*BuDABCOI
1168.94	0.00413	0.0563	760.22	0.0375	0.001023	0.0469999	0.0981692	1.5e-07
1493.29	0.00244	0.0548	844.58	0.0383	0.002047	0.0469997	0.0981691	2.9e-07		K1f = 0.03073
1817.65	0.0015	0.0533	1168.94	0.042	0.004095	0.0469994	0.0981688	5.8e-07		K1r = 0.000000000001
2142.01	0.000938	0.0525	1493.29	0.0443	0.008191	0.0469988	0.0981682	1.16e-06
2466.37	0.000375	0.0518	1817.65	0.0443	0.016383	0.0469977	0.0981671	2.32e-06		d/dt(DABCO) = -RXN1
2790.72	0.000188	0.0518	2142.01	0.045	0.032767	0.0469953	0.0981647	4.65e-06		d/dt(BuI) = -RXN1
			2466.37	0.045	0.065535	0.0469907	0.0981601	9.29e-06		d/dt(BuDABCOI) = RXN1
			2790.72	0.0458	0.131071	0.0469814	0.0981508	1.858e-05
					0.262143	0.0469629	0.0981322	3.714e-05
					0.524287	0.0469258	0.0980951	7.424e-05		INIT BuI = 0.09817
					1.04858	0.0468517	0.0980211	0.00014832		INIT DABCO = 0.047
					2.04858	0.0467109	0.0978803	0.00028912		INIT BuDABCOI = 0
					3.04858	0.0465707	0.0977401	0.00042929
					4.04857	0.0464311	0.0976005	0.00056885
					5.04857	0.0462922	0.0974616	0.00070779		Name	Value
					6.04857	0.0461539	0.0973233	0.00084612		STARTTIME	0
					7.04857	0.0460162	0.0971855	0.00098384		STOPTIME	3000
					8.04857	0.045879	0.0970484	0.00112095		DTMIN	1e-06
					9.04857	0.0457425	0.0969119	0.00125747		DTMAX	1
					10.0486	0.0456066	0.096776	0.00139338		DTOUT	0
					11.0486	0.0454713	0.0966407	0.00152871		TOLERANCE	0.01
					12.0486	0.0453366	0.0965059	0.00166344		K1f *	0.03073
					13.0486	0.0452024	0.0963718	0.00179759		K1r *	0
					14.0486	0.0450689	0.0962382	0.00193115		INIT DABCO	0.047
					15.0486	0.0449359	0.0961052	0.00206414		INIT BuI *	0.09817
					16.0486	0.0448035	0.0959728	0.00219655		INIT BuDABCOI	0
					17.0486	0.0446716	0.095841	0.00232839
					18.0486	0.0445403	0.0957097	0.00245967
					19.0486	0.0444096	0.095579	0.00259037
					20.0486	0.0442795	0.0954489	0.00272052
					21.0486	0.0441499	0.0953193	0.00285011
					22.0486	0.0440209	0.0951902	0.00297915
					23.0486	0.0438924	0.0950618	0.00310763
					24.0486	0.0437644	0.0949338	0.00323557
					25.0486	0.043637	0.0948064	0.00336296
					26.0486	0.0435102	0.0946796	0.00348981
					27.0486	0.0433839	0.0945533	0.00361613
					28.0486	0.0432581	0.0944275	0.00374191
					29.0486	0.0431329	0.0943022	0.00386715
					30.0486	0.0430081	0.0941775	0.00399188
					31.0486	0.0428839	0.0940533	0.00411607
					32.0486	0.0427602	0.0939296	0.00423975
					33.0486	0.0426371	0.0938065	0.0043629
					34.0486	0.0425145	0.0936838	0.00448555
					35.0486	0.0423923	0.0935617	0.00460768
					36.0486	0.0422707	0.0934401	0.0047293
					37.0486	0.0421496	0.093319	0.00485041
					38.0486	0.042029	0.0931984	0.00497102
					39.0486	0.0419089	0.0930783	0.00509113
					40.0486	0.0417893	0.0929586	0.00521075
					41.0486	0.0416701	0.0928395	0.00532987
					42.0486	0.0415515	0.0927209	0.00544849
					43.0486	0.0414334	0.0926027	0.00556663
					44.0486	0.0413157	0.0924851	0.00568429
					45.0486	0.0411985	0.0923679	0.00580146
					46.0486	0.0410819	0.0922512	0.00591815
					47.0486	0.0409656	0.092135	0.00603437
					48.0486	0.0408499	0.0920193	0.00615011
					49.0486	0.0407346	0.091904	0.00626537
					50.0486	0.0406198	0.0917892	0.00638017
					51.0486	0.0405055	0.0916749	0.00649451
					52.0486	0.0403916	0.091561	0.00660838
					53.0486	0.0402782	0.0914476	0.00672179
					54.0486	0.0401653	0.0913347	0.00683474
					55.0486	0.0400528	0.0912222	0.00694723
					56.0486	0.0399407	0.0911101	0.00705928
					57.0486	0.0398291	0.0909985	0.00717087
					58.0486	0.039718	0.0908874	0.00728202
					59.0486	0.0396073	0.0907767	0.00739272
					60.0486	0.039497	0.0906664	0.00750297
					61.0486	0.0393872	0.0905566	0.00761279
					62.0486	0.0392778	0.0904472	0.00772217
					63.0486	0.0391689	0.0903383	0.00783111
					64.0486	0.0390604	0.0902298	0.00793963
					65.0486	0.0389523	0.0901217	0.00804771
					66.0486	0.0388446	0.090014	0.00815536
					67.0486	0.0387374	0.0899068	0.00826259
					68.0486	0.0386306	0.0898	0.00836939
					69.0486	0.0385242	0.0896936	0.00847578
					70.0486	0.0384183	0.0895876	0.00858174
					71.0486	0.0383127	0.0894821	0.00868729
					72.0486	0.0382076	0.0893769	0.00879243
					73.0486	0.0381028	0.0892722	0.00889716
					74.0486	0.0379985	0.0891679	0.00900147
					75.0486	0.0378946	0.089064	0.00910538
					76.0486	0.0377911	0.0889605	0.00920889
					77.0486	0.037688	0.0888574	0.00931199
					78.0486	0.0375853	0.0887547	0.00941469
					79.0486	0.037483	0.0886524	0.009517
					80.0486	0.0373811	0.0885505	0.0096189
					81.0486	0.0372796	0.088449	0.00972042
					82.0486	0.0371785	0.0883478	0.00982154
					83.0486	0.0370777	0.0882471	0.00992228
					84.0486	0.0369774	0.0881468	0.0100226
					85.0486	0.0368774	0.0880468	0.0101226
					86.0486	0.0367778	0.0879472	0.0102222
					87.0486	0.0366786	0.087848	0.0103214
					88.0486	0.0365798	0.0877492	0.0104202
					89.0486	0.0364814	0.0876508	0.0105186
					90.0486	0.0363833	0.0875527	0.0106167
					91.0486	0.0362856	0.087455	0.0107144
					92.0486	0.0361883	0.0873577	0.0108117
					93.0486	0.0360913	0.0872607	0.0109087
					94.0486	0.0359947	0.0871641	0.0110053
					95.0486	0.0358985	0.0870679	0.0111015
					96.0486	0.0358027	0.086972	0.0111973
					97.0486	0.0357072	0.0868765	0.0112928
					98.0486	0.035612	0.0867814	0.011388
					99.0486	0.0355172	0.0866866	0.0114828
					100.049	0.0354228	0.0865922	0.0115772
					101.049	0.0353287	0.0864981	0.0116713
					102.049	0.035235	0.0864044	0.011765
					103.049	0.0351416	0.086311	0.0118584
					104.049	0.0350486	0.086218	0.0119514
					105.049	0.0349559	0.0861253	0.0120441
					106.049	0.0348636	0.086033	0.0121364
					107.049	0.0347716	0.085941	0.0122284
					108.049	0.0346799	0.0858493	0.0123201
					109.049	0.0345886	0.085758	0.0124114
					110.049	0.0344976	0.085667	0.0125024
					111.049	0.034407	0.0855764	0.012593
					112.049	0.0343167	0.0854861	0.0126833
					113.049	0.0342267	0.0853961	0.0127733
					114.049	0.0341371	0.0853065	0.0128629
					115.049	0.0340478	0.0852171	0.0129522
					116.049	0.0339588	0.0851281	0.0130412
					117.049	0.0338701	0.0850395	0.0131299
					118.049	0.0337818	0.0849511	0.0132182
					119.049	0.0336937	0.0848631	0.0133063
					120.049	0.033606	0.0847754	0.013394
					121.049	0.0335186	0.084688	0.0134813
					122.049	0.0334316	0.084601	0.0135684
					123.049	0.0333448	0.0845142	0.0136552
					124.049	0.0332584	0.0844278	0.0137416
					125.049	0.0331723	0.0843417	0.0138277
					126.049	0.0330865	0.0842558	0.0139135
					127.049	0.033001	0.0841703	0.013999
					128.049	0.0329158	0.0840851	0.0140842
					129.049	0.0328309	0.0840002	0.0141691
					130.049	0.0327463	0.0839157	0.0142537
					131.049	0.032662	0.0838314	0.014338
					132.049	0.032578	0.0837474	0.014422
					133.049	0.0324943	0.0836637	0.0145057
					134.049	0.0324109	0.0835803	0.0145891
					135.049	0.0323278	0.0834972	0.0146722
					136.049	0.032245	0.0834144	0.0147549
					137.049	0.0321625	0.0833319	0.0148375
					138.049	0.0320803	0.0832497	0.0149197
					139.049	0.0319984	0.0831678	0.0150016
					140.049	0.0319168	0.0830862	0.0150832
					141.049	0.0318355	0.0830048	0.0151646
					142.049	0.0317544	0.0829238	0.0152456
					143.049	0.0316736	0.082843	0.0153264
					144.049	0.0315931	0.0827625	0.0154069
					145.049	0.0315129	0.0826823	0.0154871
					146.049	0.031433	0.0826024	0.015567
					147.049	0.0313534	0.0825228	0.0156466
					148.049	0.031274	0.0824434	0.015726
					149.049	0.0311949	0.0823643	0.0158051
					150.049	0.0311161	0.0822855	0.0158839
					151.049	0.0310376	0.082207	0.0159624
					152.049	0.0309593	0.0821287	0.0160407
					153.049	0.0308813	0.0820507	0.0161187
					154.049	0.0308036	0.081973	0.0161964
					155.049	0.0307261	0.0818955	0.0162739
					156.049	0.030649	0.0818183	0.016351
					157.049	0.030572	0.0817414	0.016428
					158.049	0.0304954	0.0816648	0.0165046
					159.049	0.030419	0.0815884	0.016581
					160.049	0.0303429	0.0815122	0.0166571
					161.049	0.030267	0.0814364	0.016733
					162.049	0.0301914	0.0813608	0.0168086
					163.049	0.030116	0.0812854	0.016884
					164.049	0.0300409	0.0812103	0.0169591
					165.049	0.0299661	0.0811355	0.0170339
					166.049	0.0298915	0.0810609	0.0171085
					167.049	0.0298172	0.0809866	0.0171828
					168.049	0.0297431	0.0809125	0.0172569
					169.049	0.0296693	0.0808387	0.0173307
					170.049	0.0295957	0.0807651	0.0174043
					171.049	0.0295224	0.0806918	0.0174776
					172.049	0.0294493	0.0806187	0.0175507
					173.049	0.0293765	0.0805459	0.0176235
					174.049	0.0293039	0.0804733	0.0176961
					175.049	0.0292316	0.0804009	0.0177684
					176.049	0.0291595	0.0803289	0.0178405
					177.049	0.0290876	0.080257	0.0179124
					178.049	0.029016	0.0801854	0.017984
					179.049	0.0289446	0.080114	0.0180554
					180.049	0.0288735	0.0800429	0.0181265
					181.049	0.0288026	0.079972	0.0181974
					182.049	0.0287319	0.0799013	0.0182681
					183.049	0.0286615	0.0798309	0.0183385
					184.049	0.0285913	0.0797607	0.0184087
					185.049	0.0285214	0.0796908	0.0184786
					186.049	0.0284516	0.079621	0.0185484
					187.049	0.0283822	0.0795515	0.0186178
					188.049	0.0283129	0.0794823	0.0186871
					189.049	0.0282439	0.0794133	0.0187561
					190.049	0.0281751	0.0793444	0.018825
					191.049	0.0281065	0.0792759	0.0188935
					192.049	0.0280381	0.0792075	0.0189619
					193.049	0.02797	0.0791394	0.01903
					194.049	0.0279021	0.0790715	0.0190979
					195.049	0.0278344	0.0790038	0.0191656
					196.049	0.0277669	0.0789363	0.0192331
					197.049	0.0276997	0.0788691	0.0193003
					198.049	0.0276327	0.0788021	0.0193673
					199.049	0.0275659	0.0787353	0.0194341
					200.049	0.0274993	0.0786687	0.0195007
					201.049	0.0274329	0.0786023	0.0195671
					202.049	0.0273668	0.0785362	0.0196332
					203.049	0.0273009	0.0784702	0.0196991
					204.049	0.0272351	0.0784045	0.0197649
					205.049	0.0271696	0.078339	0.0198304
					206.049	0.0271043	0.0782737	0.0198957
					207.049	0.0270393	0.0782086	0.0199607
					208.049	0.0269744	0.0781438	0.0200256
					209.049	0.0269097	0.0780791	0.0200903
					210.049	0.0268453	0.0780146	0.0201547
					211.049	0.026781	0.0779504	0.020219
					212.049	0.026717	0.0778863	0.020283
					213.049	0.0266531	0.0778225	0.0203469
					214.049	0.0265895	0.0777589	0.0204105
					215.049	0.0265261	0.0776954	0.0204739
					216.049	0.0264628	0.0776322	0.0205372
					217.049	0.0263998	0.0775692	0.0206002
					218.049	0.026337	0.0775064	0.020663
					219.049	0.0262744	0.0774437	0.0207256
					220.049	0.0262119	0.0773813	0.0207881
					221.049	0.0261497	0.0773191	0.0208503
					222.049	0.0260877	0.0772571	0.0209123
					223.049	0.0260258	0.0771952	0.0209742
					224.049	0.0259642	0.0771336	0.0210358
					225.049	0.0259028	0.0770722	0.0210972
					226.049	0.0258415	0.0770109	0.0211585
					227.049	0.0257805	0.0769499	0.0212195
					228.049	0.0257196	0.076889	0.0212804
					229.049	0.0256589	0.0768283	0.0213411
					230.049	0.0255985	0.0767678	0.0214015
					231.049	0.0255382	0.0767076	0.0214618
					232.049	0.0254781	0.0766475	0.0215219
					233.049	0.0254182	0.0765876	0.0215818
					234.049	0.0253584	0.0765278	0.0216416
					235.049	0.0252989	0.0764683	0.0217011
					236.049	0.0252395	0.0764089	0.0217605
					237.049	0.0251804	0.0763498	0.0218196
					238.049	0.0251214	0.0762908	0.0218786
					239.049	0.0250626	0.076232	0.0219374
					240.049	0.025004	0.0761734	0.021996
					241.049	0.0249456	0.0761149	0.0220544
					242.049	0.0248873	0.0760567	0.0221127
					243.049	0.0248292	0.0759986	0.0221708
					244.049	0.0247713	0.0759407	0.0222287
					245.049	0.0247136	0.075883	0.0222864
					246.049	0.0246561	0.0758255	0.0223439
					247.049	0.0245987	0.0757681	0.0224013
					248.049	0.0245415	0.0757109	0.0224585
					249.049	0.0244845	0.0756539	0.0225155
					250.049	0.0244277	0.0755971	0.0225723
					251.049	0.024371	0.0755404	0.0226289
					252.049	0.0243146	0.0754839	0.0226854
					253.049	0.0242583	0.0754276	0.0227417
					254.049	0.0242021	0.0753715	0.0227979
					255.049	0.0241462	0.0753155	0.0228538
					256.049	0.0240904	0.0752598	0.0229096
					257.049	0.0240347	0.0752041	0.0229653
					258.049	0.0239793	0.0751487	0.0230207
					259.049	0.023924	0.0750934	0.023076
					260.049	0.0238689	0.0750383	0.0231311
					261.049	0.0238139	0.0749833	0.0231861
					262.049	0.0237591	0.0749285	0.0232409
					263.049	0.0237045	0.0748739	0.0232955
					264.049	0.0236501	0.0748194	0.0233499
					265.049	0.0235958	0.0747652	0.0234042
					266.049	0.0235417	0.074711	0.0234583
					267.049	0.0234877	0.0746571	0.0235123
					268.049	0.0234339	0.0746033	0.0235661
					269.049	0.0233803	0.0745496	0.0236197
					270.049	0.0233268	0.0744962	0.0236732
					271.049	0.0232735	0.0744428	0.0237265
					272.049	0.0232203	0.0743897	0.0237797
					273.049	0.0231673	0.0743367	0.0238327
					274.049	0.0231145	0.0742838	0.0238855
					275.049	0.0230618	0.0742312	0.0239382
					276.049	0.0230092	0.0741786	0.0239908
					277.049	0.0229569	0.0741263	0.0240431
					278.049	0.0229047	0.0740741	0.0240953
					279.049	0.0228526	0.074022	0.0241474
					280.049	0.0228007	0.0739701	0.0241993
					281.049	0.022749	0.0739184	0.024251
					282.049	0.0226974	0.0738668	0.0243026
					283.049	0.0226459	0.0738153	0.0243541
					284.049	0.0225947	0.073764	0.0244053
					285.049	0.0225435	0.0737129	0.0244565
					286.049	0.0224925	0.0736619	0.0245075
					287.049	0.0224417	0.0736111	0.0245583
					288.049	0.022391	0.0735604	0.024609
					289.049	0.0223405	0.0735099	0.0246595
					290.049	0.0222901	0.0734595	0.0247099
					291.049	0.0222398	0.0734092	0.0247602
					292.049	0.0221898	0.0733591	0.0248102
					293.049	0.0221398	0.0733092	0.0248602
					294.049	0.02209	0.0732594	0.02491
					295.049	0.0220404	0.0732097	0.0249596
					296.049	0.0219908	0.0731602	0.0250092
					297.049	0.0219415	0.0731109	0.0250585
					298.049	0.0218923	0.0730616	0.0251077
					299.049	0.0218432	0.0730126	0.0251568
					300.049	0.0217943	0.0729636	0.0252057
					301.049	0.0217455	0.0729148	0.0252545
					302.049	0.0216968	0.0728662	0.0253032
					303.049	0.0216483	0.0728177	0.0253517
					304.049	0.0215999	0.0727693	0.0254001
					305.049	0.0215517	0.0727211	0.0254483
					306.049	0.0215036	0.072673	0.0254964
					307.049	0.0214557	0.072625	0.0255443
					308.049	0.0214078	0.0725772	0.0255922
					309.049	0.0213602	0.0725296	0.0256398
					310.049	0.0213126	0.072482	0.0256874
					311.049	0.0212652	0.0724346	0.0257348
					312.049	0.021218	0.0723874	0.025782
					313.049	0.0211709	0.0723402	0.0258291
					314.049	0.0211239	0.0722933	0.0258761
					315.049	0.021077	0.0722464	0.025923
					316.049	0.0210303	0.0721997	0.0259697
					317.049	0.0209837	0.0721531	0.0260163
					318.049	0.0209372	0.0721066	0.0260628
					319.049	0.0208909	0.0720603	0.0261091
					320.049	0.0208447	0.0720141	0.0261553
					321.049	0.0207987	0.0719681	0.0262013
					322.049	0.0207527	0.0719221	0.0262473
					323.049	0.0207069	0.0718763	0.0262931
					324.049	0.0206613	0.0718306	0.0263387
					325.049	0.0206157	0.0717851	0.0263843
					326.049	0.0205703	0.0717397	0.0264297
					327.049	0.020525	0.0716944	0.026475
					328.049	0.0204799	0.0716493	0.0265201
					329.049	0.0204349	0.0716042	0.0265651
					330.049	0.02039	0.0715593	0.02661
					331.049	0.0203452	0.0715146	0.0266548
					332.049	0.0203006	0.0714699	0.0266994
					333.049	0.020256	0.0714254	0.026744
					334.049	0.0202116	0.071381	0.0267884
					335.049	0.0201674	0.0713368	0.0268326
					336.049	0.0201232	0.0712926	0.0268768
					337.049	0.0200792	0.0712486	0.0269208
					338.049	0.0200353	0.0712047	0.0269647
					339.049	0.0199915	0.0711609	0.0270085
					340.049	0.0199479	0.0711173	0.0270521
					341.049	0.0199044	0.0710737	0.0270956
					342.049	0.0198609	0.0710303	0.0271391
					343.049	0.0198176	0.070987	0.0271824
					344.049	0.0197745	0.0709439	0.0272255
					345.049	0.0197314	0.0709008	0.0272686
					346.049	0.0196885	0.0708579	0.0273115
					347.049	0.0196457	0.0708151	0.0273543
					348.049	0.019603	0.0707724	0.027397
					349.049	0.0195604	0.0707298	0.0274396
					350.049	0.019518	0.0706874	0.027482
					351.049	0.0194757	0.070645	0.0275243
					352.049	0.0194334	0.0706028	0.0275666
					353.049	0.0193913	0.0705607	0.0276087
					354.049	0.0193494	0.0705187	0.0276506
					355.049	0.0193075	0.0704769	0.0276925
					356.049	0.0192657	0.0704351	0.0277343
					357.049	0.0192241	0.0703935	0.0277759
					358.049	0.0191826	0.0703519	0.0278174
					359.049	0.0191411	0.0703105	0.0278589
					360.049	0.0190999	0.0702692	0.0279001
					361.049	0.0190587	0.0702281	0.0279413
					362.049	0.0190176	0.070187	0.0279824
					363.049	0.0189766	0.070146	0.0280234
					364.049	0.0189358	0.0701052	0.0280642
					365.049	0.0188951	0.0700644	0.0281049
					366.049	0.0188544	0.0700238	0.0281456
					367.049	0.0188139	0.0699833	0.0281861
					368.049	0.0187735	0.0699429	0.0282265
					369.049	0.0187332	0.0699026	0.0282668
					370.049	0.018693	0.0698624	0.028307
					371.049	0.018653	0.0698224	0.028347
					372.049	0.018613	0.0697824	0.028387
					373.049	0.0185732	0.0697425	0.0284269
					374.049	0.0185334	0.0697028	0.0284666
					375.049	0.0184938	0.0696631	0.0285062
					376.049	0.0184542	0.0696236	0.0285458
					377.049	0.0184148	0.0695842	0.0285852
					378.049	0.0183755	0.0695449	0.0286245
					379.049	0.0183363	0.0695057	0.0286637
					380.049	0.0182972	0.0694665	0.0287028
					381.049	0.0182582	0.0694275	0.0287418
					382.049	0.0182192	0.0693886	0.0287808
					383.049	0.0181805	0.0693499	0.0288195
					384.049	0.0181418	0.0693112	0.0288582
					385.049	0.0181032	0.0692726	0.0288968
					386.049	0.0180647	0.0692341	0.0289353
					387.049	0.0180263	0.0691957	0.0289737
					388.049	0.017988	0.0691574	0.029012
					389.049	0.0179499	0.0691193	0.0290501
					390.049	0.0179118	0.0690812	0.0290882
					391.049	0.0178738	0.0690432	0.0291262
					392.049	0.017836	0.0690053	0.029164
					393.049	0.0177982	0.0689676	0.0292018
					394.049	0.0177605	0.0689299	0.0292395
					395.049	0.017723	0.0688923	0.029277
					396.049	0.0176855	0.0688549	0.0293145
					397.049	0.0176481	0.0688175	0.0293519
					398.049	0.0176109	0.0687802	0.0293891
					399.049	0.0175737	0.0687431	0.0294263
					400.049	0.0175366	0.068706	0.0294634
					401.049	0.0174996	0.068669	0.0295004
					402.049	0.0174628	0.0686322	0.0295372
					403.049	0.017426	0.0685954	0.029574
					404.049	0.0173893	0.0685587	0.0296107
					405.049	0.0173527	0.0685221	0.0296473
					406.049	0.0173162	0.0684856	0.0296838
					407.049	0.0172798	0.0684492	0.0297202
					408.049	0.0172435	0.0684129	0.0297565
					409.049	0.0172073	0.0683767	0.0297927
					410.049	0.0171712	0.0683406	0.0298288
					411.049	0.0171352	0.0683046	0.0298648
					412.049	0.0170993	0.0682687	0.0299007
					413.049	0.0170635	0.0682329	0.0299365
					414.049	0.0170278	0.0681971	0.0299722
					415.049	0.0169921	0.0681615	0.0300079
					416.049	0.0169566	0.068126	0.0300434
					417.049	0.0169211	0.0680905	0.0300789
					418.049	0.0168858	0.0680552	0.0301142
					419.049	0.0168505	0.0680199	0.0301495
					420.049	0.0168153	0.0679847	0.0301847
					421.049	0.0167803	0.0679496	0.0302198
					422.049	0.0167453	0.0679146	0.0302547
					423.049	0.0167104	0.0678798	0.0302896
					424.049	0.0166756	0.0678449	0.0303244
					425.049	0.0166408	0.0678102	0.0303592
					426.049	0.0166062	0.0677756	0.0303938
					427.049	0.0165717	0.067741	0.0304283
					428.049	0.0165372	0.0677066	0.0304628
					429.049	0.0165029	0.0676722	0.0304971
					430.049	0.0164686	0.067638	0.0305314
					431.049	0.0164344	0.0676038	0.0305656
					432.049	0.0164003	0.0675697	0.0305997
					433.049	0.0163663	0.0675357	0.0306337
					434.049	0.0163324	0.0675018	0.0306676
					435.049	0.0162985	0.0674679	0.0307015
					436.049	0.0162648	0.0674342	0.0307352
					437.049	0.0162311	0.0674005	0.0307689
					438.049	0.0161976	0.067367	0.0308024
					439.049	0.0161641	0.0673335	0.0308359
					440.049	0.0161307	0.0673001	0.0308693
					441.049	0.0160974	0.0672668	0.0309026
					442.049	0.0160641	0.0672335	0.0309359
					443.049	0.016031	0.0672004	0.030969
					444.049	0.0159979	0.0671673	0.0310021
					445.049	0.015965	0.0671343	0.031035
					446.049	0.0159321	0.0671015	0.0310679
					447.049	0.0158993	0.0670686	0.0311007
					448.049	0.0158665	0.0670359	0.0311335
					449.049	0.0158339	0.0670033	0.0311661
					450.049	0.0158013	0.0669707	0.0311987
					451.049	0.0157689	0.0669383	0.0312311
					452.049	0.0157365	0.0669059	0.0312635
					453.049	0.0157042	0.0668735	0.0312958
					454.049	0.0156719	0.0668413	0.0313281
					455.049	0.0156398	0.0668092	0.0313602
					456.049	0.0156077	0.0667771	0.0313923
					457.049	0.0155757	0.0667451	0.0314243
					458.049	0.0155438	0.0667132	0.0314562
					459.049	0.015512	0.0666814	0.031488
					460.049	0.0154803	0.0666496	0.0315197
					461.049	0.0154486	0.066618	0.0315514
					462.049	0.015417	0.0665864	0.031583
					463.049	0.0153855	0.0665549	0.0316145
					464.049	0.0153541	0.0665235	0.0316459
					465.049	0.0153227	0.0664921	0.0316773
					466.049	0.0152915	0.0664609	0.0317085
					467.049	0.0152603	0.0664297	0.0317397
					468.049	0.0152292	0.0663986	0.0317708
					469.049	0.0151981	0.0663675	0.0318019
					470.049	0.0151672	0.0663366	0.0318328
					471.049	0.0151363	0.0663057	0.0318637
					472.049	0.0151055	0.0662749	0.0318945
					473.049	0.0150748	0.0662442	0.0319252
					474.049	0.0150441	0.0662135	0.0319559
					475.049	0.0150136	0.066183	0.0319864
					476.049	0.0149831	0.0661525	0.0320169
					477.049	0.0149526	0.066122	0.0320474
					478.049	0.0149223	0.0660917	0.0320777
					479.049	0.014892	0.0660614	0.032108
					480.049	0.0148618	0.0660312	0.0321381
					481.049	0.0148317	0.0660011	0.0321683
					482.049	0.0148017	0.0659711	0.0321983
					483.049	0.0147717	0.0659411	0.0322283
					484.049	0.0147418	0.0659112	0.0322582
					485.049	0.014712	0.0658814	0.032288
					486.049	0.0146823	0.0658516	0.0323177
					487.049	0.0146526	0.065822	0.0323474
					488.049	0.014623	0.0657924	0.032377
					489.049	0.0145935	0.0657629	0.0324065
					490.049	0.014564	0.0657334	0.032436
					491.049	0.0145346	0.065704	0.0324654
					492.049	0.0145053	0.0656747	0.0324947
					493.049	0.0144761	0.0656455	0.0325239
					494.049	0.0144469	0.0656163	0.0325531
					495.049	0.0144178	0.0655872	0.0325822
					496.049	0.0143888	0.0655582	0.0326112
					497.049	0.0143599	0.0655292	0.0326401
					498.049	0.014331	0.0655004	0.032669
					499.049	0.0143022	0.0654716	0.0326978
					500.049	0.0142734	0.0654428	0.0327266
					501.049	0.0142448	0.0654142	0.0327552
					502.049	0.0142162	0.0653856	0.0327838
					503.049	0.0141876	0.065357	0.0328123
					504.049	0.0141592	0.0653286	0.0328408
					505.049	0.0141308	0.0653002	0.0328692
					506.049	0.0141025	0.0652719	0.0328975
					507.049	0.0140742	0.0652436	0.0329258
					508.049	0.014046	0.0652154	0.032954
					509.049	0.0140179	0.0651873	0.0329821
					510.049	0.0139899	0.0651593	0.0330101
					511.049	0.0139619	0.0651313	0.0330381
					512.049	0.013934	0.0651034	0.033066
					513.049	0.0139062	0.0650756	0.0330938
					514.049	0.0138784	0.0650478	0.0331216
					515.049	0.0138507	0.0650201	0.0331493
					516.049	0.013823	0.0649924	0.0331769
					517.049	0.0137955	0.0649649	0.0332045
					518.049	0.013768	0.0649374	0.033232
					519.049	0.0137405	0.0649099	0.0332595
					520.049	0.0137132	0.0648825	0.0332868
					521.049	0.0136859	0.0648552	0.0333141
					522.049	0.0136586	0.064828	0.0333414
					523.049	0.0136314	0.0648008	0.0333686
					524.049	0.0136043	0.0647737	0.0333957
					525.049	0.0135773	0.0647467	0.0334227
					526.049	0.0135503	0.0647197	0.0334497
					527.049	0.0135234	0.0646928	0.0334766
					528.049	0.0134965	0.0646659	0.0335035
					529.049	0.0134698	0.0646391	0.0335302
					530.049	0.013443	0.0646124	0.033557
					531.049	0.0134164	0.0645858	0.0335836
					532.049	0.0133898	0.0645592	0.0336102
					533.049	0.0133633	0.0645326	0.0336367
					534.049	0.0133368	0.0645062	0.0336632
					535.049	0.0133104	0.0644798	0.0336896
					536.049	0.013284	0.0644534	0.033716
					537.049	0.0132578	0.0644272	0.0337422
					538.049	0.0132315	0.0644009	0.0337684
					539.049	0.0132054	0.0643748	0.0337946
					540.049	0.0131793	0.0643487	0.0338207
					541.049	0.0131533	0.0643227	0.0338467
					542.049	0.0131273	0.0642967	0.0338727
					543.049	0.0131014	0.0642708	0.0338986
					544.049	0.0130756	0.0642449	0.0339244
					545.049	0.0130498	0.0642192	0.0339502
					546.049	0.0130241	0.0641934	0.0339759
					547.049	0.0129984	0.0641678	0.0340016
					548.049	0.0129728	0.0641422	0.0340272
					549.049	0.0129473	0.0641166	0.0340527
					550.049	0.0129218	0.0640912	0.0340782
					551.049	0.0128964	0.0640658	0.0341036
					552.049	0.012871	0.0640404	0.034129
					553.049	0.0128457	0.0640151	0.0341543
					554.049	0.0128205	0.0639899	0.0341795
					555.049	0.0127953	0.0639647	0.0342047
					556.049	0.0127702	0.0639396	0.0342298
					557.049	0.0127451	0.0639145	0.0342549
					558.049	0.0127201	0.0638895	0.0342799
					559.049	0.0126952	0.0638646	0.0343048
					560.049	0.0126703	0.0638397	0.0343297
					561.049	0.0126455	0.0638149	0.0343545
					562.049	0.0126207	0.0637901	0.0343793
					563.049	0.012596	0.0637654	0.034404
					564.049	0.0125713	0.0637407	0.0344287
					565.049	0.0125468	0.0637161	0.0344532
					566.049	0.0125222	0.0636916	0.0344778
					567.049	0.0124977	0.0636671	0.0345023
					568.049	0.0124733	0.0636427	0.0345267
					569.049	0.012449	0.0636183	0.034551
					570.049	0.0124246	0.063594	0.0345754
					571.049	0.0124004	0.0635698	0.0345996
					572.049	0.0123762	0.0635456	0.0346238
					573.049	0.0123521	0.0635214	0.0346479
					574.049	0.012328	0.0634974	0.034672
					575.049	0.0123039	0.0634733	0.034696
					576.049	0.01228	0.0634494	0.03472
					577.049	0.0122561	0.0634255	0.0347439
					578.049	0.0122322	0.0634016	0.0347678
					579.049	0.0122084	0.0633778	0.0347916
					580.049	0.0121847	0.063354	0.0348153
					581.049	0.012161	0.0633303	0.034839
					582.049	0.0121373	0.0633067	0.0348627
					583.049	0.0121137	0.0632831	0.0348863
					584.049	0.0120902	0.0632596	0.0349098
					585.049	0.0120667	0.0632361	0.0349332
					586.049	0.0120433	0.0632127	0.0349567
					587.049	0.01202	0.0631894	0.03498
					588.049	0.0119966	0.063166	0.0350034
					589.049	0.0119734	0.0631428	0.0350266
					590.049	0.0119502	0.0631196	0.0350498
					591.049	0.011927	0.0630964	0.035073
					592.049	0.0119039	0.0630733	0.0350961
					593.049	0.0118809	0.0630503	0.0351191
					594.049	0.0118579	0.0630273	0.0351421
					595.049	0.011835	0.0630044	0.035165
					596.049	0.0118121	0.0629815	0.0351879
					597.049	0.0117892	0.0629586	0.0352107
					598.049	0.0117665	0.0629359	0.0352335
					599.049	0.0117437	0.0629131	0.0352563
					600.049	0.0117211	0.0628905	0.0352789
					601.049	0.0116984	0.0628678	0.0353016
					602.049	0.0116759	0.0628453	0.0353241
					603.049	0.0116533	0.0628227	0.0353467
					604.049	0.0116309	0.0628003	0.0353691
					605.049	0.0116084	0.0627778	0.0353916
					606.049	0.0115861	0.0627555	0.0354139
					607.049	0.0115638	0.0627332	0.0354362
					608.049	0.0115415	0.0627109	0.0354585
					609.049	0.0115193	0.0626887	0.0354807
					610.049	0.0114971	0.0626665	0.0355029
					611.049	0.011475	0.0626444	0.035525
					612.049	0.0114529	0.0626223	0.035547
					613.049	0.0114309	0.0626003	0.0355691
					614.049	0.011409	0.0625784	0.035591
					615.049	0.0113871	0.0625564	0.0356129
					616.049	0.0113652	0.0625346	0.0356348
					617.049	0.0113434	0.0625128	0.0356566
					618.049	0.0113216	0.062491	0.0356784
					619.049	0.0112999	0.0624693	0.0357001
					620.049	0.0112782	0.0624476	0.0357218
					621.049	0.0112566	0.062426	0.0357434
					622.049	0.011235	0.0624044	0.0357649
					623.049	0.0112135	0.0623829	0.0357865
					624.049	0.0111921	0.0623614	0.0358079
					625.049	0.0111706	0.06234	0.0358294
					626.049	0.0111493	0.0623187	0.0358507
					627.049	0.0111279	0.0622973	0.0358721
					628.049	0.0111067	0.062276	0.0358933
					629.049	0.0110854	0.0622548	0.0359146
					630.049	0.0110642	0.0622336	0.0359358
					631.049	0.0110431	0.0622125	0.0359569
					632.049	0.011022	0.0621914	0.035978
					633.049	0.011001	0.0621704	0.035999
					634.049	0.01098	0.0621494	0.03602
					635.049	0.0109591	0.0621284	0.0360409
					636.049	0.0109382	0.0621075	0.0360618
					637.049	0.0109173	0.0620867	0.0360827
					638.049	0.0108965	0.0620659	0.0361035
					639.049	0.0108758	0.0620451	0.0361242
					640.049	0.010855	0.0620244	0.036145
					641.049	0.0108344	0.0620038	0.0361656
					642.049	0.0108138	0.0619831	0.0361863
					643.049	0.0107932	0.0619626	0.0362068
					644.049	0.0107726	0.061942	0.0362273
					645.049	0.0107522	0.0619216	0.0362478
					646.049	0.0107317	0.0619011	0.0362683
					647.049	0.0107113	0.0618807	0.0362886
					648.049	0.010691	0.0618604	0.036309
					649.049	0.0106707	0.0618401	0.0363293
					650.049	0.0106505	0.0618198	0.0363496
					651.049	0.0106302	0.0617996	0.0363698
					652.049	0.0106101	0.0617795	0.0363899
					653.049	0.01059	0.0617593	0.03641
					654.049	0.0105699	0.0617393	0.0364301
					655.049	0.0105498	0.0617192	0.0364502
					656.049	0.0105299	0.0616992	0.0364701
					657.049	0.0105099	0.0616793	0.0364901
					658.049	0.01049	0.0616594	0.03651
					659.049	0.0104702	0.0616396	0.0365298
					660.049	0.0104504	0.0616198	0.0365496
					661.049	0.0104306	0.0616	0.0365694
					662.049	0.0104109	0.0615803	0.0365891
					663.049	0.0103912	0.0615606	0.0366088
					664.049	0.0103716	0.0615409	0.0366284
					665.049	0.010352	0.0615214	0.036648
					666.049	0.0103324	0.0615018	0.0366676
					667.049	0.0103129	0.0614823	0.0366871
					668.049	0.0102935	0.0614628	0.0367065
					669.049	0.010274	0.0614434	0.036726
					670.049	0.0102547	0.0614241	0.0367453
					671.049	0.0102353	0.0614047	0.0367647
					672.049	0.010216	0.0613854	0.036784
					673.049	0.0101968	0.0613662	0.0368032
					674.049	0.0101776	0.061347	0.0368224
					675.049	0.0101584	0.0613278	0.0368416
					676.049	0.0101393	0.0613087	0.0368607
					677.049	0.0101202	0.0612896	0.0368798
					678.049	0.0101012	0.0612706	0.0368988
					679.049	0.0100822	0.0612516	0.0369178
					680.049	0.0100632	0.0612326	0.0369368
					681.049	0.0100443	0.0612137	0.0369557
					682.049	0.0100254	0.0611948	0.0369746
					683.049	0.0100066	0.061176	0.0369934
					684.049	0.00998783	0.0611572	0.0370122
					685.049	0.00996908	0.0611385	0.0370309
					686.049	0.00995037	0.0611198	0.0370496
					687.049	0.0099317	0.0611011	0.0370683
					688.049	0.00991308	0.0610825	0.0370869
					689.049	0.00989449	0.0610639	0.0371055
					690.049	0.00987595	0.0610453	0.037124
					691.049	0.00985744	0.0610268	0.0371426
					692.049	0.00983898	0.0610084	0.037161
					693.049	0.00982055	0.0609899	0.0371795
					694.049	0.00980217	0.0609715	0.0371978
					695.049	0.00978382	0.0609532	0.0372162
					696.049	0.00976552	0.0609349	0.0372345
					697.049	0.00974725	0.0609166	0.0372528
					698.049	0.00972903	0.0608984	0.037271
					699.049	0.00971084	0.0608802	0.0372892
					700.049	0.0096927	0.0608621	0.0373073
					701.049	0.00967459	0.060844	0.0373254
					702.049	0.00965652	0.0608259	0.0373435
					703.049	0.00963849	0.0608079	0.0373615
					704.049	0.0096205	0.0607899	0.0373795
					705.049	0.00960255	0.0607719	0.0373974
					706.049	0.00958464	0.060754	0.0374154
					707.049	0.00956677	0.0607362	0.0374332
					708.049	0.00954893	0.0607183	0.0374511
					709.049	0.00953114	0.0607005	0.0374689
					710.049	0.00951338	0.0606828	0.0374866
					711.049	0.00949566	0.060665	0.0375043
					712.049	0.00947798	0.0606474	0.037522
					713.049	0.00946033	0.0606297	0.0375397
					714.049	0.00944273	0.0606121	0.0375573
					715.049	0.00942516	0.0605945	0.0375748
					716.049	0.00940763	0.060577	0.0375924
					717.049	0.00939014	0.0605595	0.0376099
					718.049	0.00937268	0.0605421	0.0376273
					719.049	0.00935527	0.0605246	0.0376447
					720.049	0.00933789	0.0605073	0.0376621
					721.049	0.00932054	0.0604899	0.0376795
					722.049	0.00930324	0.0604726	0.0376968
					723.049	0.00928597	0.0604553	0.037714
					724.049	0.00926874	0.0604381	0.0377313
					725.049	0.00925154	0.0604209	0.0377485
					726.049	0.00923438	0.0604038	0.0377656
					727.049	0.00921726	0.0603867	0.0377827
					728.049	0.00920018	0.0603696	0.0377998
					729.049	0.00918313	0.0603525	0.0378169
					730.049	0.00916612	0.0603355	0.0378339
					731.049	0.00914914	0.0603185	0.0378509
					732.049	0.0091322	0.0603016	0.0378678
					733.049	0.0091153	0.0602847	0.0378847
					734.049	0.00909843	0.0602678	0.0379016
					735.049	0.0090816	0.060251	0.0379184
					736.049	0.00906481	0.0602342	0.0379352
					737.049	0.00904805	0.0602174	0.0379519
					738.049	0.00903132	0.0602007	0.0379687
					739.049	0.00901463	0.060184	0.0379854
					740.049	0.00899798	0.0601674	0.038002
					741.049	0.00898136	0.0601508	0.0380186
					742.049	0.00896478	0.0601342	0.0380352
					743.049	0.00894823	0.0601176	0.0380518
					744.049	0.00893172	0.0601011	0.0380683
					745.049	0.00891524	0.0600846	0.0380848
					746.049	0.0088988	0.0600682	0.0381012
					747.049	0.00888239	0.0600518	0.0381176
					748.049	0.00886602	0.0600354	0.038134
					749.049	0.00884968	0.0600191	0.0381503
					750.049	0.00883338	0.0600028	0.0381666
					751.049	0.00881711	0.0599865	0.0381829
					752.049	0.00880088	0.0599703	0.0381991
					753.049	0.00878468	0.0599541	0.0382153
					754.049	0.00876851	0.0599379	0.0382315
					755.049	0.00875238	0.0599218	0.0382476
					756.049	0.00873628	0.0599057	0.0382637
					757.049	0.00872021	0.0598896	0.0382798
					758.049	0.00870418	0.0598736	0.0382958
					759.049	0.00868819	0.0598576	0.0383118
					760.049	0.00867222	0.0598416	0.0383278
					761.049	0.00865629	0.0598257	0.0383437
					762.049	0.0086404	0.0598098	0.0383596
					763.049	0.00862454	0.0597939	0.0383755
					764.049	0.00860871	0.0597781	0.0383913
					765.049	0.00859291	0.0597623	0.0384071
					766.049	0.00857715	0.0597465	0.0384229
					767.049	0.00856142	0.0597308	0.0384386
					768.049	0.00854572	0.0597151	0.0384543
					769.049	0.00853006	0.0596994	0.0384699
					770.049	0.00851442	0.0596838	0.0384856
					771.049	0.00849883	0.0596682	0.0385012
					772.049	0.00848326	0.0596527	0.0385167
					773.049	0.00846773	0.0596371	0.0385323
					774.049	0.00845223	0.0596216	0.0385478
					775.049	0.00843676	0.0596061	0.0385632
					776.049	0.00842132	0.0595907	0.0385787
					777.049	0.00840592	0.0595753	0.0385941
					778.049	0.00839055	0.0595599	0.0386094
					779.049	0.00837521	0.0595446	0.0386248
					780.049	0.0083599	0.0595293	0.0386401
					781.049	0.00834462	0.059514	0.0386554
					782.049	0.00832938	0.0594988	0.0386706
					783.049	0.00831417	0.0594836	0.0386858
					784.049	0.00829899	0.0594684	0.038701
					785.049	0.00828384	0.0594532	0.0387162
					786.049	0.00826872	0.0594381	0.0387313
					787.049	0.00825363	0.059423	0.0387464
					788.049	0.00823858	0.059408	0.0387614
					789.049	0.00822355	0.0593929	0.0387764
					790.049	0.00820856	0.0593779	0.0387914
					791.049	0.0081936	0.059363	0.0388064
					792.049	0.00817867	0.0593481	0.0388213
					793.049	0.00816377	0.0593332	0.0388362
					794.049	0.0081489	0.0593183	0.0388511
					795.049	0.00813406	0.0593035	0.0388659
					796.049	0.00811926	0.0592886	0.0388807
					797.049	0.00810448	0.0592739	0.0388955
					798.049	0.00808974	0.0592591	0.0389103
					799.049	0.00807502	0.0592444	0.038925
					800.049	0.00806034	0.0592297	0.0389397
					801.049	0.00804568	0.0592151	0.0389543
					802.049	0.00803106	0.0592004	0.0389689
					803.049	0.00801646	0.0591858	0.0389835
					804.049	0.0080019	0.0591713	0.0389981
					805.049	0.00798737	0.0591568	0.0390126
					806.049	0.00797286	0.0591423	0.0390271
					807.049	0.00795839	0.0591278	0.0390416
					808.049	0.00794394	0.0591133	0.0390561
					809.049	0.00792953	0.0590989	0.0390705
					810.049	0.00791514	0.0590845	0.0390849
					811.049	0.00790079	0.0590702	0.0390992
					812.049	0.00788646	0.0590559	0.0391135
					813.049	0.00787217	0.0590415	0.0391278
					814.049	0.0078579	0.0590273	0.0391421
					815.049	0.00784366	0.059013	0.0391563
					816.049	0.00782945	0.0589988	0.0391705
					817.049	0.00781527	0.0589847	0.0391847
					818.049	0.00780112	0.0589705	0.0391989
					819.049	0.007787	0.0589564	0.039213
					820.049	0.00777291	0.0589423	0.0392271
					821.049	0.00775885	0.0589282	0.0392412
					822.049	0.00774481	0.0589142	0.0392552
					823.049	0.00773081	0.0589002	0.0392692
					824.049	0.00771683	0.0588862	0.0392832
					825.049	0.00770288	0.0588723	0.0392971
					826.049	0.00768896	0.0588583	0.039311
					827.049	0.00767507	0.0588444	0.0393249
					828.049	0.0076612	0.0588306	0.0393388
					829.049	0.00764737	0.0588168	0.0393526
					830.049	0.00763356	0.0588029	0.0393664
					831.049	0.00761978	0.0587892	0.0393802
					832.049	0.00760603	0.0587754	0.039394
					833.049	0.00759231	0.0587617	0.0394077
					834.049	0.00757862	0.058748	0.0394214
					835.049	0.00756495	0.0587343	0.039435
					836.049	0.00755131	0.0587207	0.0394487
					837.049	0.0075377	0.0587071	0.0394623
					838.049	0.00752411	0.0586935	0.0394759
					839.049	0.00751056	0.0586799	0.0394894
					840.049	0.00749703	0.0586664	0.039503
					841.049	0.00748353	0.0586529	0.0395165
					842.049	0.00747006	0.0586394	0.0395299
					843.049	0.00745661	0.058626	0.0395434
					844.049	0.00744319	0.0586126	0.0395568
					845.049	0.0074298	0.0585992	0.0395702
					846.049	0.00741643	0.0585858	0.0395836
					847.049	0.0074031	0.0585725	0.0395969
					848.049	0.00738979	0.0585592	0.0396102
					849.049	0.0073765	0.0585459	0.0396235
					850.049	0.00736325	0.0585326	0.0396367
					851.049	0.00735002	0.0585194	0.03965
					852.049	0.00733681	0.0585062	0.0396632
					853.049	0.00732364	0.058493	0.0396764
					854.049	0.00731049	0.0584799	0.0396895
					855.049	0.00729736	0.0584667	0.0397026
					856.049	0.00728427	0.0584537	0.0397157
					857.049	0.0072712	0.0584406	0.0397288
					858.049	0.00725815	0.0584275	0.0397419
					859.049	0.00724513	0.0584145	0.0397549
					860.049	0.00723214	0.0584015	0.0397679
					861.049	0.00721918	0.0583886	0.0397808
					862.049	0.00720624	0.0583756	0.0397938
					863.049	0.00719333	0.0583627	0.0398067
					864.049	0.00718044	0.0583498	0.0398196
					865.049	0.00716758	0.058337	0.0398324
					866.049	0.00715474	0.0583241	0.0398453
					867.049	0.00714193	0.0583113	0.0398581
					868.049	0.00712915	0.0582985	0.0398708
					869.049	0.00711639	0.0582858	0.0398836
					870.049	0.00710366	0.058273	0.0398963
					871.049	0.00709095	0.0582603	0.0399091
					872.049	0.00707827	0.0582477	0.0399217
					873.049	0.00706561	0.058235	0.0399344
					874.049	0.00705298	0.0582224	0.039947
					875.049	0.00704038	0.0582098	0.0399596
					876.049	0.0070278	0.0581972	0.0399722
					877.049	0.00701524	0.0581846	0.0399848
					878.049	0.00700271	0.0581721	0.0399973
					879.049	0.00699021	0.0581596	0.0400098
					880.049	0.00697773	0.0581471	0.0400223
					881.049	0.00696527	0.0581347	0.0400347
					882.049	0.00695284	0.0581222	0.0400472
					883.049	0.00694044	0.0581098	0.0400596
					884.049	0.00692806	0.0580974	0.0400719
					885.049	0.0069157	0.0580851	0.0400843
					886.049	0.00690337	0.0580728	0.0400966
					887.049	0.00689107	0.0580604	0.0401089
					888.049	0.00687878	0.0580482	0.0401212
					889.049	0.00686653	0.0580359	0.0401335
					890.049	0.00685429	0.0580237	0.0401457
					891.049	0.00684209	0.0580115	0.0401579
					892.049	0.0068299	0.0579993	0.0401701
					893.049	0.00681774	0.0579871	0.0401823
					894.049	0.00680561	0.057975	0.0401944
					895.049	0.00679349	0.0579629	0.0402065
					896.049	0.00678141	0.0579508	0.0402186
					897.049	0.00676934	0.0579387	0.0402307
					898.049	0.0067573	0.0579267	0.0402427
					899.049	0.00674529	0.0579147	0.0402547
					900.049	0.0067333	0.0579027	0.0402667
					901.049	0.00672133	0.0578907	0.0402787
					902.049	0.00670938	0.0578788	0.0402906
					903.049	0.00669746	0.0578668	0.0403025
					904.049	0.00668557	0.057855	0.0403144
					905.049	0.00667369	0.0578431	0.0403263
					906.049	0.00666184	0.0578312	0.0403382
					907.049	0.00665002	0.0578194	0.04035
					908.049	0.00663821	0.0578076	0.0403618
					909.049	0.00662643	0.0577958	0.0403736
					910.049	0.00661468	0.0577841	0.0403853
					911.049	0.00660294	0.0577723	0.0403971
					912.049	0.00659123	0.0577606	0.0404088
					913.049	0.00657955	0.0577489	0.0404204
					914.049	0.00656788	0.0577373	0.0404321
					915.049	0.00655624	0.0577256	0.0404438
					916.049	0.00654463	0.057714	0.0404554
					917.049	0.00653303	0.0577024	0.040467
					918.049	0.00652146	0.0576908	0.0404785
					919.049	0.00650991	0.0576793	0.0404901
					920.049	0.00649838	0.0576678	0.0405016
					921.049	0.00648688	0.0576563	0.0405131
					922.049	0.0064754	0.0576448	0.0405246
					923.049	0.00646394	0.0576333	0.0405361
					924.049	0.0064525	0.0576219	0.0405475
					925.049	0.00644109	0.0576105	0.0405589
					926.049	0.0064297	0.0575991	0.0405703
					927.049	0.00641833	0.0575877	0.0405817
					928.049	0.00640699	0.0575764	0.040593
					929.049	0.00639566	0.057565	0.0406043
					930.049	0.00638436	0.0575537	0.0406156
					931.049	0.00637308	0.0575425	0.0406269
					932.049	0.00636182	0.0575312	0.0406382
					933.049	0.00635059	0.05752	0.0406494
					934.049	0.00633937	0.0575088	0.0406606
					935.049	0.00632818	0.0574976	0.0406718
					936.049	0.00631701	0.0574864	0.040683
					937.049	0.00630587	0.0574752	0.0406941
					938.049	0.00629474	0.0574641	0.0407053
					939.049	0.00628364	0.057453	0.0407164
					940.049	0.00627255	0.0574419	0.0407274
					941.049	0.00626149	0.0574309	0.0407385
					942.049	0.00625045	0.0574198	0.0407496
					943.049	0.00623944	0.0574088	0.0407606
					944.049	0.00622844	0.0573978	0.0407716
					945.049	0.00621747	0.0573869	0.0407825
					946.049	0.00620651	0.0573759	0.0407935
					947.049	0.00619558	0.057365	0.0408044
					948.049	0.00618467	0.0573541	0.0408153
					949.049	0.00617378	0.0573432	0.0408262
					950.049	0.00616292	0.0573323	0.0408371
					951.049	0.00615207	0.0573215	0.0408479
					952.049	0.00614124	0.0573106	0.0408588
					953.049	0.00613044	0.0572998	0.0408696
					954.049	0.00611966	0.057289	0.0408803
					955.049	0.00610889	0.0572783	0.0408911
					956.049	0.00609815	0.0572675	0.0409018
					957.049	0.00608743	0.0572568	0.0409126
					958.049	0.00607673	0.0572461	0.0409233
					959.049	0.00606605	0.0572354	0.0409339
					960.049	0.0060554	0.0572248	0.0409446
					961.049	0.00604476	0.0572141	0.0409552
					962.049	0.00603414	0.0572035	0.0409659
					963.049	0.00602355	0.0571929	0.0409764
					964.049	0.00601297	0.0571824	0.040987
					965.049	0.00600242	0.0571718	0.0409976
					966.049	0.00599188	0.0571613	0.0410081
					967.049	0.00598137	0.0571508	0.0410186
					968.049	0.00597087	0.0571403	0.0410291
					969.049	0.0059604	0.0571298	0.0410396
					970.049	0.00594995	0.0571193	0.04105
					971.049	0.00593951	0.0571089	0.0410605
					972.049	0.0059291	0.0570985	0.0410709
					973.049	0.00591871	0.0570881	0.0410813
					974.049	0.00590834	0.0570777	0.0410917
					975.049	0.00589798	0.0570674	0.041102
					976.049	0.00588765	0.057057	0.0411123
					977.049	0.00587734	0.0570467	0.0411227
					978.049	0.00586705	0.0570364	0.041133
					979.049	0.00585677	0.0570262	0.0411432
					980.049	0.00584652	0.0570159	0.0411535
					981.049	0.00583629	0.0570057	0.0411637
					982.049	0.00582608	0.0569955	0.0411739
					983.049	0.00581588	0.0569853	0.0411841
					984.049	0.00580571	0.0569751	0.0411943
					985.049	0.00579555	0.0569649	0.0412044
					986.049	0.00578542	0.0569548	0.0412146
					987.049	0.0057753	0.0569447	0.0412247
					988.049	0.00576521	0.0569346	0.0412348
					989.049	0.00575513	0.0569245	0.0412449
					990.049	0.00574508	0.0569145	0.0412549
					991.049	0.00573504	0.0569044	0.041265
					992.049	0.00572502	0.0568944	0.041275
					993.049	0.00571502	0.0568844	0.041285
					994.049	0.00570504	0.0568744	0.041295
					995.049	0.00569508	0.0568645	0.0413049
					996.049	0.00568514	0.0568545	0.0413149
					997.049	0.00567522	0.0568446	0.0413248
					998.049	0.00566531	0.0568347	0.0413347
					999.049	0.00565543	0.0568248	0.0413446
					1000.05	0.00564556	0.056815	0.0413544
					1001.05	0.00563572	0.0568051	0.0413643
					1002.05	0.00562589	0.0567953	0.0413741
					1003.05	0.00561608	0.0567855	0.0413839
					1004.05	0.00560629	0.0567757	0.0413937
					1005.05	0.00559652	0.0567659	0.0414035
					1006.05	0.00558677	0.0567561	0.0414132
					1007.05	0.00557703	0.0567464	0.041423
					1008.05	0.00556732	0.0567367	0.0414327
					1009.05	0.00555762	0.056727	0.0414424
					1010.05	0.00554794	0.0567173	0.0414521
					1011.05	0.00553828	0.0567077	0.0414617
					1012.05	0.00552864	0.056698	0.0414714
					1013.05	0.00551902	0.0566884	0.041481
					1014.05	0.00550942	0.0566788	0.0414906
					1015.05	0.00549983	0.0566692	0.0415002
					1016.05	0.00549026	0.0566596	0.0415097
					1017.05	0.00548071	0.0566501	0.0415193
					1018.05	0.00547118	0.0566406	0.0415288
					1019.05	0.00546167	0.0566311	0.0415383
					1020.05	0.00545217	0.0566216	0.0415478
					1021.05	0.0054427	0.0566121	0.0415573
					1022.05	0.00543324	0.0566026	0.0415668
					1023.05	0.0054238	0.0565932	0.0415762
					1024.05	0.00541437	0.0565838	0.0415856
					1025.05	0.00540497	0.0565744	0.041595
					1026.05	0.00539558	0.056565	0.0416044
					1027.05	0.00538621	0.0565556	0.0416138
					1028.05	0.00537686	0.0565462	0.0416231
					1029.05	0.00536753	0.0565369	0.0416325
					1030.05	0.00535821	0.0565276	0.0416418
					1031.05	0.00534891	0.0565183	0.0416511
					1032.05	0.00533963	0.056509	0.0416604
					1033.05	0.00533037	0.0564998	0.0416696
					1034.05	0.00532113	0.0564905	0.0416789
					1035.05	0.0053119	0.0564813	0.0416881
					1036.05	0.00530269	0.0564721	0.0416973
					1037.05	0.00529349	0.0564629	0.0417065
					1038.05	0.00528432	0.0564537	0.0417157
					1039.05	0.00527516	0.0564446	0.0417248
					1040.05	0.00526602	0.0564354	0.041734
					1041.05	0.0052569	0.0564263	0.0417431
					1042.05	0.00524779	0.0564172	0.0417522
					1043.05	0.0052387	0.0564081	0.0417613
					1044.05	0.00522963	0.056399	0.0417704
					1045.05	0.00522058	0.05639	0.0417794
					1046.05	0.00521154	0.0563809	0.0417885
					1047.05	0.00520252	0.0563719	0.0417975
					1048.05	0.00519352	0.0563629	0.0418065
					1049.05	0.00518453	0.0563539	0.0418155
					1050.05	0.00517556	0.0563449	0.0418244
					1051.05	0.00516661	0.056336	0.0418334
					1052.05	0.00515767	0.0563271	0.0418423
					1053.05	0.00514876	0.0563181	0.0418512
					1054.05	0.00513985	0.0563092	0.0418601
					1055.05	0.00513097	0.0563003	0.041869
					1056.05	0.0051221	0.0562915	0.0418779
					1057.05	0.00511325	0.0562826	0.0418868
					1058.05	0.00510441	0.0562738	0.0418956
					1059.05	0.0050956	0.056265	0.0419044
					1060.05	0.0050868	0.0562562	0.0419132
					1061.05	0.00507801	0.0562474	0.041922
					1062.05	0.00506924	0.0562386	0.0419308
					1063.05	0.00506049	0.0562299	0.0419395
					1064.05	0.00505176	0.0562211	0.0419482
					1065.05	0.00504304	0.0562124	0.041957
					1066.05	0.00503433	0.0562037	0.0419657
					1067.05	0.00502565	0.056195	0.0419744
					1068.05	0.00501698	0.0561864	0.041983
					1069.05	0.00500832	0.0561777	0.0419917
					1070.05	0.00499969	0.0561691	0.0420003
					1071.05	0.00499107	0.0561605	0.0420089
					1072.05	0.00498246	0.0561519	0.0420175
					1073.05	0.00497387	0.0561433	0.0420261
					1074.05	0.0049653	0.0561347	0.0420347
					1075.05	0.00495674	0.0561261	0.0420433
					1076.05	0.0049482	0.0561176	0.0420518
					1077.05	0.00493968	0.0561091	0.0420603
					1078.05	0.00493117	0.0561006	0.0420688
					1079.05	0.00492268	0.0560921	0.0420773
					1080.05	0.0049142	0.0560836	0.0420858
					1081.05	0.00490574	0.0560751	0.0420943
					1082.05	0.0048973	0.0560667	0.0421027
					1083.05	0.00488887	0.0560582	0.0421111
					1084.05	0.00488045	0.0560498	0.0421195
					1085.05	0.00487206	0.0560414	0.0421279
					1086.05	0.00486367	0.0560331	0.0421363
					1087.05	0.00485531	0.0560247	0.0421447
					1088.05	0.00484696	0.0560163	0.042153
					1089.05	0.00483862	0.056008	0.0421614
					1090.05	0.0048303	0.0559997	0.0421697
					1091.05	0.004822	0.0559914	0.042178
					1092.05	0.00481371	0.0559831	0.0421863
					1093.05	0.00480544	0.0559748	0.0421946
					1094.05	0.00479718	0.0559666	0.0422028
					1095.05	0.00478894	0.0559583	0.0422111
					1096.05	0.00478071	0.0559501	0.0422193
					1097.05	0.0047725	0.0559419	0.0422275
					1098.05	0.0047643	0.0559337	0.0422357
					1099.05	0.00475612	0.0559255	0.0422439
					1100.05	0.00474796	0.0559173	0.042252
					1101.05	0.00473981	0.0559092	0.0422602
					1102.05	0.00473167	0.0559011	0.0422683
					1103.05	0.00472355	0.0558929	0.0422765
					1104.05	0.00471545	0.0558848	0.0422845
					1105.05	0.00470736	0.0558767	0.0422926
					1106.05	0.00469928	0.0558687	0.0423007
					1107.05	0.00469122	0.0558606	0.0423088
					1108.05	0.00468318	0.0558526	0.0423168
					1109.05	0.00467515	0.0558445	0.0423248
					1110.05	0.00466713	0.0558365	0.0423329
					1111.05	0.00465913	0.0558285	0.0423409
					1112.05	0.00465115	0.0558205	0.0423489
					1113.05	0.00464318	0.0558126	0.0423568
					1114.05	0.00463522	0.0558046	0.0423648
					1115.05	0.00462728	0.0557967	0.0423727
					1116.05	0.00461935	0.0557887	0.0423806
					1117.05	0.00461144	0.0557808	0.0423886
					1118.05	0.00460355	0.0557729	0.0423965
					1119.05	0.00459566	0.055765	0.0424043
					1120.05	0.0045878	0.0557572	0.0424122
					1121.05	0.00457994	0.0557493	0.0424201
					1122.05	0.00457211	0.0557415	0.0424279
					1123.05	0.00456428	0.0557337	0.0424357
					1124.05	0.00455647	0.0557259	0.0424435
					1125.05	0.00454868	0.0557181	0.0424513
					1126.05	0.0045409	0.0557103	0.0424591
					1127.05	0.00453313	0.0557025	0.0424669
					1128.05	0.00452538	0.0556948	0.0424746
					1129.05	0.00451764	0.055687	0.0424824
					1130.05	0.00450992	0.0556793	0.0424901
					1131.05	0.00450221	0.0556716	0.0424978
					1132.05	0.00449452	0.0556639	0.0425055
					1133.05	0.00448684	0.0556562	0.0425132
					1134.05	0.00447917	0.0556485	0.0425208
					1135.05	0.00447152	0.0556409	0.0425285
					1136.05	0.00446388	0.0556333	0.0425361
					1137.05	0.00445626	0.0556256	0.0425437
					1138.05	0.00444865	0.055618	0.0425514
					1139.05	0.00444105	0.0556104	0.0425589
					1140.05	0.00443347	0.0556029	0.0425665
					1141.05	0.0044259	0.0555953	0.0425741
					1142.05	0.00441835	0.0555877	0.0425816
					1143.05	0.00441081	0.0555802	0.0425892
					1144.05	0.00440328	0.0555727	0.0425967
					1145.05	0.00439577	0.0555652	0.0426042
					1146.05	0.00438827	0.0555577	0.0426117
					1147.05	0.00438079	0.0555502	0.0426192
					1148.05	0.00437331	0.0555427	0.0426267
					1149.05	0.00436586	0.0555352	0.0426341
					1150.05	0.00435841	0.0555278	0.0426416
					1151.05	0.00435098	0.0555204	0.042649
					1152.05	0.00434357	0.0555129	0.0426564
					1153.05	0.00433617	0.0555056	0.0426638
					1154.05	0.00432878	0.0554982	0.0426712
					1155.05	0.0043214	0.0554908	0.0426786
					1156.05	0.00431404	0.0554834	0.042686
					1157.05	0.00430669	0.0554761	0.0426933
					1158.05	0.00429936	0.0554687	0.0427006
					1159.05	0.00429204	0.0554614	0.042708
					1160.05	0.00428473	0.0554541	0.0427153
					1161.05	0.00427744	0.0554468	0.0427226
					1162.05	0.00427015	0.0554395	0.0427298
					1163.05	0.00426289	0.0554323	0.0427371
					1164.05	0.00425563	0.055425	0.0427444
					1165.05	0.00424839	0.0554178	0.0427516
					1166.05	0.00424116	0.0554106	0.0427588
					1167.05	0.00423395	0.0554033	0.042766
					1168.05	0.00422675	0.0553961	0.0427732
					1169.05	0.00421956	0.0553889	0.0427804
					1170.05	0.00421238	0.0553818	0.0427876
					1171.05	0.00420522	0.0553746	0.0427948
					1172.05	0.00419807	0.0553675	0.0428019
					1173.05	0.00419094	0.0553603	0.0428091
					1174.05	0.00418382	0.0553532	0.0428162
					1175.05	0.00417671	0.0553461	0.0428233
					1176.05	0.00416961	0.055339	0.0428304
					1177.05	0.00416253	0.0553319	0.0428375
					1178.05	0.00415546	0.0553248	0.0428445
					1179.05	0.0041484	0.0553178	0.0428516
					1180.05	0.00414135	0.0553107	0.0428586
					1181.05	0.00413432	0.0553037	0.0428657
					1182.05	0.0041273	0.0552967	0.0428727
					1183.05	0.00412029	0.0552897	0.0428797
					1184.05	0.0041133	0.0552827	0.0428867
					1185.05	0.00410632	0.0552757	0.0428937
					1186.05	0.00409935	0.0552687	0.0429006
					1187.05	0.0040924	0.0552618	0.0429076
					1188.05	0.00408545	0.0552548	0.0429146
					1189.05	0.00407852	0.0552479	0.0429215
					1190.05	0.00407161	0.055241	0.0429284
					1191.05	0.0040647	0.0552341	0.0429353
					1192.05	0.00405781	0.0552272	0.0429422
					1193.05	0.00405093	0.0552203	0.0429491
					1194.05	0.00404406	0.0552134	0.0429559
					1195.05	0.00403721	0.0552066	0.0429628
					1196.05	0.00403036	0.0551997	0.0429696
					1197.05	0.00402353	0.0551929	0.0429765
					1198.05	0.00401672	0.0551861	0.0429833
					1199.05	0.00400991	0.0551793	0.0429901
					1200.05	0.00400312	0.0551725	0.0429969
					1201.05	0.00399634	0.0551657	0.0430037
					1202.05	0.00398957	0.055159	0.0430104
					1203.05	0.00398282	0.0551522	0.0430172
					1204.05	0.00397607	0.0551455	0.0430239
					1205.05	0.00396934	0.0551387	0.0430307
					1206.05	0.00396262	0.055132	0.0430374
					1207.05	0.00395591	0.0551253	0.0430441
					1208.05	0.00394922	0.0551186	0.0430508
					1209.05	0.00394254	0.0551119	0.0430575
					1210.05	0.00393587	0.0551053	0.0430641
					1211.05	0.00392921	0.0550986	0.0430708
					1212.05	0.00392256	0.055092	0.0430774
					1213.05	0.00391593	0.0550853	0.0430841
					1214.05	0.00390931	0.0550787	0.0430907
					1215.05	0.0039027	0.0550721	0.0430973
					1216.05	0.0038961	0.0550655	0.0431039
					1217.05	0.00388951	0.0550589	0.0431105
					1218.05	0.00388294	0.0550523	0.0431171
					1219.05	0.00387637	0.0550458	0.0431236
					1220.05	0.00386982	0.0550392	0.0431302
					1221.05	0.00386328	0.0550327	0.0431367
					1222.05	0.00385676	0.0550261	0.0431432
					1223.05	0.00385024	0.0550196	0.0431498
					1224.05	0.00384374	0.0550131	0.0431563
					1225.05	0.00383725	0.0550066	0.0431627
					1226.05	0.00383077	0.0550001	0.0431692
					1227.05	0.0038243	0.0549937	0.0431757
					1228.05	0.00381784	0.0549872	0.0431822
					1229.05	0.0038114	0.0549808	0.0431886
					1230.05	0.00380496	0.0549743	0.043195
					1231.05	0.00379854	0.0549679	0.0432015
					1232.05	0.00379213	0.0549615	0.0432079
					1233.05	0.00378573	0.0549551	0.0432143
					1234.05	0.00377935	0.0549487	0.0432206
					1235.05	0.00377297	0.0549424	0.043227
					1236.05	0.00376661	0.054936	0.0432334
					1237.05	0.00376026	0.0549296	0.0432397
					1238.05	0.00375391	0.0549233	0.0432461
					1239.05	0.00374759	0.054917	0.0432524
					1240.05	0.00374127	0.0549106	0.0432587
					1241.05	0.00373496	0.0549043	0.043265
					1242.05	0.00372866	0.054898	0.0432713
					1243.05	0.00372238	0.0548918	0.0432776
					1244.05	0.00371611	0.0548855	0.0432839
					1245.05	0.00370985	0.0548792	0.0432901
					1246.05	0.0037036	0.054873	0.0432964
					1247.05	0.00369736	0.0548667	0.0433026
					1248.05	0.00369113	0.0548605	0.0433089
					1249.05	0.00368491	0.0548543	0.0433151
					1250.05	0.00367871	0.0548481	0.0433213
					1251.05	0.00367251	0.0548419	0.0433275
					1252.05	0.00366633	0.0548357	0.0433337
					1253.05	0.00366016	0.0548295	0.0433398
					1254.05	0.003654	0.0548234	0.043346
					1255.05	0.00364785	0.0548172	0.0433521
					1256.05	0.00364171	0.0548111	0.0433583
					1257.05	0.00363558	0.054805	0.0433644
					1258.05	0.00362946	0.0547989	0.0433705
					1259.05	0.00362336	0.0547927	0.0433766
					1260.05	0.00361726	0.0547866	0.0433827
					1261.05	0.00361118	0.0547806	0.0433888
					1262.05	0.0036051	0.0547745	0.0433949
					1263.05	0.00359904	0.0547684	0.043401
					1264.05	0.00359299	0.0547624	0.043407
					1265.05	0.00358695	0.0547563	0.0434131
					1266.05	0.00358092	0.0547503	0.0434191
					1267.05	0.0035749	0.0547443	0.0434251
					1268.05	0.00356889	0.0547383	0.0434311
					1269.05	0.0035629	0.0547323	0.0434371
					1270.05	0.00355691	0.0547263	0.0434431
					1271.05	0.00355093	0.0547203	0.0434491
					1272.05	0.00354497	0.0547144	0.043455
					1273.05	0.00353901	0.0547084	0.043461
					1274.05	0.00353307	0.0547025	0.0434669
					1275.05	0.00352714	0.0546965	0.0434729
					1276.05	0.00352121	0.0546906	0.0434788
					1277.05	0.0035153	0.0546847	0.0434847
					1278.05	0.0035094	0.0546788	0.0434906
					1279.05	0.00350351	0.0546729	0.0434965
					1280.05	0.00349763	0.054667	0.0435024
					1281.05	0.00349176	0.0546611	0.0435082
					1282.05	0.0034859	0.0546553	0.0435141
					1283.05	0.00348005	0.0546494	0.04352
					1284.05	0.00347421	0.0546436	0.0435258
					1285.05	0.00346838	0.0546378	0.0435316
					1286.05	0.00346257	0.0546319	0.0435374
					1287.05	0.00345676	0.0546261	0.0435432
					1288.05	0.00345096	0.0546203	0.043549
					1289.05	0.00344517	0.0546146	0.0435548
					1290.05	0.0034394	0.0546088	0.0435606
					1291.05	0.00343363	0.054603	0.0435664
					1292.05	0.00342788	0.0545973	0.0435721
					1293.05	0.00342213	0.0545915	0.0435779
					1294.05	0.00341639	0.0545858	0.0435836
					1295.05	0.00341067	0.05458	0.0435893
					1296.05	0.00340495	0.0545743	0.0435951
					1297.05	0.00339925	0.0545686	0.0436008
					1298.05	0.00339356	0.0545629	0.0436064
					1299.05	0.00338787	0.0545573	0.0436121
					1300.05	0.0033822	0.0545516	0.0436178
					1301.05	0.00337653	0.0545459	0.0436235
					1302.05	0.00337088	0.0545403	0.0436291
					1303.05	0.00336523	0.0545346	0.0436348
					1304.05	0.0033596	0.054529	0.0436404
					1305.05	0.00335398	0.0545234	0.043646
					1306.05	0.00334836	0.0545177	0.0436516
					1307.05	0.00334276	0.0545121	0.0436572
					1308.05	0.00333716	0.0545066	0.0436628
					1309.05	0.00333158	0.054501	0.0436684
					1310.05	0.003326	0.0544954	0.043674
					1311.05	0.00332044	0.0544898	0.0436796
					1312.05	0.00331489	0.0544843	0.0436851
					1313.05	0.00330934	0.0544787	0.0436907
					1314.05	0.00330381	0.0544732	0.0436962
					1315.05	0.00329828	0.0544677	0.0437017
					1316.05	0.00329277	0.0544622	0.0437072
					1317.05	0.00328726	0.0544566	0.0437127
					1318.05	0.00328176	0.0544511	0.0437182
					1319.05	0.00327628	0.0544457	0.0437237
					1320.05	0.0032708	0.0544402	0.0437292
					1321.05	0.00326534	0.0544347	0.0437347
					1322.05	0.00325988	0.0544293	0.0437401
					1323.05	0.00325443	0.0544238	0.0437456
					1324.05	0.00324899	0.0544184	0.043751
					1325.05	0.00324357	0.054413	0.0437564
					1326.05	0.00323815	0.0544075	0.0437618
					1327.05	0.00323274	0.0544021	0.0437673
					1328.05	0.00322734	0.0543967	0.0437727
					1329.05	0.00322195	0.0543913	0.043778
					1330.05	0.00321657	0.054386	0.0437834
					1331.05	0.0032112	0.0543806	0.0437888
					1332.05	0.00320584	0.0543752	0.0437942
					1333.05	0.00320049	0.0543699	0.0437995
					1334.05	0.00319514	0.0543645	0.0438049
					1335.05	0.00318981	0.0543592	0.0438102
					1336.05	0.00318449	0.0543539	0.0438155
					1337.05	0.00317917	0.0543486	0.0438208
					1338.05	0.00317387	0.0543433	0.0438261
					1339.05	0.00316857	0.054338	0.0438314
					1340.05	0.00316329	0.0543327	0.0438367
					1341.05	0.00315801	0.0543274	0.043842
					1342.05	0.00315274	0.0543221	0.0438473
					1343.05	0.00314749	0.0543169	0.0438525
					1344.05	0.00314224	0.0543116	0.0438578
					1345.05	0.003137	0.0543064	0.043863
					1346.05	0.00313177	0.0543011	0.0438682
					1347.05	0.00312655	0.0542959	0.0438735
					1348.05	0.00312134	0.0542907	0.0438787
					1349.05	0.00311613	0.0542855	0.0438839
					1350.05	0.00311094	0.0542803	0.0438891
					1351.05	0.00310576	0.0542751	0.0438942
					1352.05	0.00310058	0.05427	0.0438994
					1353.05	0.00309542	0.0542648	0.0439046
					1354.05	0.00309026	0.0542596	0.0439097
					1355.05	0.00308511	0.0542545	0.0439149
					1356.05	0.00307997	0.0542494	0.04392
					1357.05	0.00307484	0.0542442	0.0439252
					1358.05	0.00306972	0.0542391	0.0439303
					1359.05	0.00306461	0.054234	0.0439354
					1360.05	0.00305951	0.0542289	0.0439405
					1361.05	0.00305441	0.0542238	0.0439456
					1362.05	0.00304933	0.0542187	0.0439507
					1363.05	0.00304425	0.0542136	0.0439558
					1364.05	0.00303919	0.0542086	0.0439608
					1365.05	0.00303413	0.0542035	0.0439659
					1366.05	0.00302908	0.0541985	0.0439709
					1367.05	0.00302404	0.0541934	0.043976
					1368.05	0.00301901	0.0541884	0.043981
					1369.05	0.00301399	0.0541834	0.043986
					1370.05	0.00300897	0.0541784	0.043991
					1371.05	0.00300397	0.0541734	0.043996
					1372.05	0.00299897	0.0541684	0.044001
					1373.05	0.00299398	0.0541634	0.044006
					1374.05	0.00298901	0.0541584	0.044011
					1375.05	0.00298404	0.0541534	0.044016
					1376.05	0.00297908	0.0541485	0.0440209
					1377.05	0.00297412	0.0541435	0.0440259
					1378.05	0.00296918	0.0541386	0.0440308
					1379.05	0.00296424	0.0541336	0.0440358
					1380.05	0.00295932	0.0541287	0.0440407
					1381.05	0.0029544	0.0541238	0.0440456
					1382.05	0.00294949	0.0541189	0.0440505
					1383.05	0.00294459	0.054114	0.0440554
					1384.05	0.0029397	0.0541091	0.0440603
					1385.05	0.00293481	0.0541042	0.0440652
					1386.05	0.00292994	0.0540993	0.0440701
					1387.05	0.00292507	0.0540945	0.0440749
					1388.05	0.00292022	0.0540896	0.0440798
					1389.05	0.00291537	0.0540848	0.0440846
					1390.05	0.00291053	0.0540799	0.0440895
					1391.05	0.00290569	0.0540751	0.0440943
					1392.05	0.00290087	0.0540703	0.0440991
					1393.05	0.00289605	0.0540654	0.044104
					1394.05	0.00289125	0.0540606	0.0441088
					1395.05	0.00288645	0.0540558	0.0441136
					1396.05	0.00288166	0.054051	0.0441183
					1397.05	0.00287688	0.0540463	0.0441231
					1398.05	0.0028721	0.0540415	0.0441279
					1399.05	0.00286734	0.0540367	0.0441327
					1400.05	0.00286258	0.054032	0.0441374
					1401.05	0.00285783	0.0540272	0.0441422
					1402.05	0.00285309	0.0540225	0.0441469
					1403.05	0.00284836	0.0540178	0.0441516
					1404.05	0.00284364	0.054013	0.0441564
					1405.05	0.00283892	0.0540083	0.0441611
					1406.05	0.00283421	0.0540036	0.0441658
					1407.05	0.00282952	0.0539989	0.0441705
					1408.05	0.00282482	0.0539942	0.0441752
					1409.05	0.00282014	0.0539895	0.0441799
					1410.05	0.00281547	0.0539849	0.0441845
					1411.05	0.0028108	0.0539802	0.0441892
					1412.05	0.00280614	0.0539755	0.0441939
					1413.05	0.00280149	0.0539709	0.0441985
					1414.05	0.00279685	0.0539662	0.0442031
					1415.05	0.00279222	0.0539616	0.0442078
					1416.05	0.00278759	0.053957	0.0442124
					1417.05	0.00278297	0.0539524	0.044217
					1418.05	0.00277836	0.0539478	0.0442216
					1419.05	0.00277376	0.0539432	0.0442262
					1420.05	0.00276917	0.0539386	0.0442308
					1421.05	0.00276458	0.053934	0.0442354
					1422.05	0.00276001	0.0539294	0.04424
					1423.05	0.00275544	0.0539248	0.0442446
					1424.05	0.00275087	0.0539203	0.0442491
					1425.05	0.00274632	0.0539157	0.0442537
					1426.05	0.00274178	0.0539112	0.0442582
					1427.05	0.00273724	0.0539066	0.0442628
					1428.05	0.00273271	0.0539021	0.0442673
					1429.05	0.00272818	0.0538976	0.0442718
					1430.05	0.00272367	0.0538931	0.0442763
					1431.05	0.00271916	0.0538886	0.0442808
					1432.05	0.00271467	0.0538841	0.0442853
					1433.05	0.00271017	0.0538796	0.0442898
					1434.05	0.00270569	0.0538751	0.0442943
					1435.05	0.00270122	0.0538706	0.0442988
					1436.05	0.00269675	0.0538661	0.0443033
					1437.05	0.00269229	0.0538617	0.0443077
					1438.05	0.00268784	0.0538572	0.0443122
					1439.05	0.00268339	0.0538528	0.0443166
					1440.05	0.00267896	0.0538483	0.044321
					1441.05	0.00267453	0.0538439	0.0443255
					1442.05	0.00267011	0.0538395	0.0443299
					1443.05	0.00266569	0.0538351	0.0443343
					1444.05	0.00266129	0.0538307	0.0443387
					1445.05	0.00265689	0.0538263	0.0443431
					1446.05	0.0026525	0.0538219	0.0443475
					1447.05	0.00264812	0.0538175	0.0443519
					1448.05	0.00264374	0.0538131	0.0443563
					1449.05	0.00263937	0.0538088	0.0443606
					1450.05	0.00263501	0.0538044	0.044365
					1451.05	0.00263066	0.0538	0.0443693
					1452.05	0.00262631	0.0537957	0.0443737
					1453.05	0.00262198	0.0537914	0.044378
					1454.05	0.00261765	0.053787	0.0443824
					1455.05	0.00261332	0.0537827	0.0443867
					1456.05	0.00260901	0.0537784	0.044391
					1457.05	0.0026047	0.0537741	0.0443953
					1458.05	0.0026004	0.0537698	0.0443996
					1459.05	0.00259611	0.0537655	0.0444039
					1460.05	0.00259182	0.0537612	0.0444082
					1461.05	0.00258755	0.0537569	0.0444124
					1462.05	0.00258328	0.0537527	0.0444167
					1463.05	0.00257901	0.0537484	0.044421
					1464.05	0.00257476	0.0537441	0.0444252
					1465.05	0.00257051	0.0537399	0.0444295
					1466.05	0.00256627	0.0537357	0.0444337
					1467.05	0.00256203	0.0537314	0.044438
					1468.05	0.00255781	0.0537272	0.0444422
					1469.05	0.00255359	0.053723	0.0444464
					1470.05	0.00254938	0.0537188	0.0444506
					1471.05	0.00254517	0.0537146	0.0444548
					1472.05	0.00254097	0.0537104	0.044459
					1473.05	0.00253678	0.0537062	0.0444632
					1474.05	0.0025326	0.053702	0.0444674
					1475.05	0.00252843	0.0536978	0.0444716
					1476.05	0.00252426	0.0536936	0.0444757
					1477.05	0.0025201	0.0536895	0.0444799
					1478.05	0.00251594	0.0536853	0.0444841
					1479.05	0.0025118	0.0536812	0.0444882
					1480.05	0.00250766	0.053677	0.0444923
					1481.05	0.00250352	0.0536729	0.0444965
					1482.05	0.0024994	0.0536688	0.0445006
					1483.05	0.00249528	0.0536647	0.0445047
					1484.05	0.00249117	0.0536606	0.0445088
					1485.05	0.00248707	0.0536565	0.0445129
					1486.05	0.00248297	0.0536524	0.044517
					1487.05	0.00247888	0.0536483	0.0445211
					1488.05	0.0024748	0.0536442	0.0445252
					1489.05	0.00247072	0.0536401	0.0445293
					1490.05	0.00246665	0.053636	0.0445333
					1491.05	0.00246259	0.053632	0.0445374
					1492.05	0.00245853	0.0536279	0.0445415
					1493.05	0.00245449	0.0536239	0.0445455
					1494.05	0.00245045	0.0536198	0.0445496
					1495.05	0.00244641	0.0536158	0.0445536
					1496.05	0.00244239	0.0536118	0.0445576
					1497.05	0.00243837	0.0536078	0.0445616
					1498.05	0.00243435	0.0536037	0.0445656
					1499.05	0.00243035	0.0535997	0.0445697
					1500.05	0.00242635	0.0535957	0.0445736
					1501.05	0.00242235	0.0535917	0.0445777
					1502.05	0.00241837	0.0535878	0.0445816
					1503.05	0.00241439	0.0535838	0.0445856
					1504.05	0.00241042	0.0535798	0.0445896
					1505.05	0.00240645	0.0535758	0.0445936
					1506.05	0.0024025	0.0535719	0.0445975
					1507.05	0.00239854	0.0535679	0.0446015
					1508.05	0.0023946	0.053564	0.0446054
					1509.05	0.00239066	0.05356	0.0446093
					1510.05	0.00238673	0.0535561	0.0446133
					1511.05	0.00238281	0.0535522	0.0446172
					1512.05	0.00237889	0.0535483	0.0446211
					1513.05	0.00237498	0.0535444	0.044625
					1514.05	0.00237107	0.0535405	0.0446289
					1515.05	0.00236718	0.0535366	0.0446328
					1516.05	0.00236328	0.0535327	0.0446367
					1517.05	0.0023594	0.0535288	0.0446406
					1518.05	0.00235552	0.0535249	0.0446445
					1519.05	0.00235165	0.053521	0.0446484
					1520.05	0.00234779	0.0535172	0.0446522
					1521.05	0.00234393	0.0535133	0.0446561
					1522.05	0.00234008	0.0535095	0.0446599
					1523.05	0.00233624	0.0535056	0.0446638
					1524.05	0.0023324	0.0535018	0.0446676
					1525.05	0.00232857	0.053498	0.0446714
					1526.05	0.00232474	0.0534941	0.0446753
					1527.05	0.00232092	0.0534903	0.0446791
					1528.05	0.00231711	0.0534865	0.0446829
					1529.05	0.00231331	0.0534827	0.0446867
					1530.05	0.00230951	0.0534789	0.0446905
					1531.05	0.00230572	0.0534751	0.0446943
					1532.05	0.00230193	0.0534713	0.0446981
					1533.05	0.00229815	0.0534675	0.0447019
					1534.05	0.00229438	0.0534638	0.0447056
					1535.05	0.00229062	0.05346	0.0447094
					1536.05	0.00228686	0.0534562	0.0447131
					1537.05	0.0022831	0.0534525	0.0447169
					1538.05	0.00227936	0.0534487	0.0447206
					1539.05	0.00227562	0.053445	0.0447244
					1540.05	0.00227188	0.0534413	0.0447281
					1541.05	0.00226815	0.0534375	0.0447318
					1542.05	0.00226443	0.0534338	0.0447356
					1543.05	0.00226072	0.0534301	0.0447393
					1544.05	0.00225701	0.0534264	0.044743
					1545.05	0.00225331	0.0534227	0.0447467
					1546.05	0.00224961	0.053419	0.0447504
					1547.05	0.00224592	0.0534153	0.0447541
					1548.05	0.00224224	0.0534116	0.0447578
					1549.05	0.00223856	0.053408	0.0447614
					1550.05	0.00223489	0.0534043	0.0447651
					1551.05	0.00223123	0.0534006	0.0447688
					1552.05	0.00222757	0.0533969	0.0447724
					1553.05	0.00222392	0.0533933	0.0447761
					1554.05	0.00222027	0.0533897	0.0447797
					1555.05	0.00221663	0.053386	0.0447834
					1556.05	0.002213	0.0533824	0.044787
					1557.05	0.00220937	0.0533788	0.0447906
					1558.05	0.00220575	0.0533751	0.0447943
					1559.05	0.00220214	0.0533715	0.0447979
					1560.05	0.00219853	0.0533679	0.0448015
					1561.05	0.00219493	0.0533643	0.0448051
					1562.05	0.00219133	0.0533607	0.0448087
					1563.05	0.00218774	0.0533571	0.0448123
					1564.05	0.00218416	0.0533535	0.0448158
					1565.05	0.00218058	0.05335	0.0448194
					1566.05	0.00217701	0.0533464	0.044823
					1567.05	0.00217344	0.0533428	0.0448266
					1568.05	0.00216988	0.0533393	0.0448301
					1569.05	0.00216633	0.0533357	0.0448337
					1570.05	0.00216278	0.0533322	0.0448372
					1571.05	0.00215924	0.0533286	0.0448408
					1572.05	0.00215571	0.0533251	0.0448443
					1573.05	0.00215218	0.0533216	0.0448478
					1574.05	0.00214865	0.053318	0.0448513
					1575.05	0.00214514	0.0533145	0.0448549
					1576.05	0.00214163	0.053311	0.0448584
					1577.05	0.00213812	0.0533075	0.0448619
					1578.05	0.00213462	0.053304	0.0448654
					1579.05	0.00213113	0.0533005	0.0448689
					1580.05	0.00212764	0.053297	0.0448724
					1581.05	0.00212416	0.0532935	0.0448758
					1582.05	0.00212068	0.0532901	0.0448793
					1583.05	0.00211721	0.0532866	0.0448828
					1584.05	0.00211375	0.0532831	0.0448863
					1585.05	0.00211029	0.0532797	0.0448897
					1586.05	0.00210684	0.0532762	0.0448932
					1587.05	0.00210339	0.0532728	0.0448966
					1588.05	0.00209995	0.0532693	0.0449
					1589.05	0.00209652	0.0532659	0.0449035
					1590.05	0.00209309	0.0532625	0.0449069
					1591.05	0.00208967	0.0532591	0.0449103
					1592.05	0.00208625	0.0532556	0.0449138
					1593.05	0.00208284	0.0532522	0.0449172
					1594.05	0.00207943	0.0532488	0.0449206
					1595.05	0.00207604	0.0532454	0.044924
					1596.05	0.00207264	0.053242	0.0449274
					1597.05	0.00206925	0.0532386	0.0449307
					1598.05	0.00206587	0.0532353	0.0449341
					1599.05	0.0020625	0.0532319	0.0449375
					1600.05	0.00205912	0.0532285	0.0449409
					1601.05	0.00205576	0.0532251	0.0449442
					1602.05	0.0020524	0.0532218	0.0449476
					1603.05	0.00204905	0.0532184	0.044951
					1604.05	0.0020457	0.0532151	0.0449543
					1605.05	0.00204236	0.0532117	0.0449576
					1606.05	0.00203902	0.0532084	0.044961
					1607.05	0.00203569	0.0532051	0.0449643
					1608.05	0.00203236	0.0532017	0.0449676
					1609.05	0.00202904	0.0531984	0.044971
					1610.05	0.00202573	0.0531951	0.0449743
					1611.05	0.00202242	0.0531918	0.0449776
					1612.05	0.00201912	0.0531885	0.0449809
					1613.05	0.00201582	0.0531852	0.0449842
					1614.05	0.00201253	0.0531819	0.0449875
					1615.05	0.00200924	0.0531786	0.0449908
					1616.05	0.00200596	0.0531754	0.044994
					1617.05	0.00200269	0.0531721	0.0449973
					1618.05	0.00199942	0.0531688	0.0450006
					1619.05	0.00199616	0.0531655	0.0450038
					1620.05	0.0019929	0.0531623	0.0450071
					1621.05	0.00198965	0.053159	0.0450103
					1622.05	0.0019864	0.0531558	0.0450136
					1623.05	0.00198316	0.0531525	0.0450168
					1624.05	0.00197992	0.0531493	0.0450201
					1625.05	0.00197669	0.0531461	0.0450233
					1626.05	0.00197346	0.0531428	0.0450265
					1627.05	0.00197024	0.0531396	0.0450298
					1628.05	0.00196703	0.0531364	0.045033
					1629.05	0.00196382	0.0531332	0.0450362
					1630.05	0.00196062	0.05313	0.0450394
					1631.05	0.00195742	0.0531268	0.0450426
					1632.05	0.00195423	0.0531236	0.0450458
					1633.05	0.00195104	0.0531204	0.045049
					1634.05	0.00194786	0.0531172	0.0450521
					1635.05	0.00194468	0.0531141	0.0450553
					1636.05	0.00194151	0.0531109	0.0450585
					1637.05	0.00193834	0.0531077	0.0450617
					1638.05	0.00193518	0.0531046	0.0450648
					1639.05	0.00193203	0.0531014	0.045068
					1640.05	0.00192888	0.0530983	0.0450711
					1641.05	0.00192573	0.0530951	0.0450743
					1642.05	0.00192259	0.053092	0.0450774
					1643.05	0.00191946	0.0530888	0.0450805
					1644.05	0.00191633	0.0530857	0.0450837
					1645.05	0.00191321	0.0530826	0.0450868
					1646.05	0.00191009	0.0530795	0.0450899
					1647.05	0.00190698	0.0530764	0.045093
					1648.05	0.00190387	0.0530733	0.0450961
					1649.05	0.00190077	0.0530702	0.0450992
					1650.05	0.00189767	0.0530671	0.0451023
					1651.05	0.00189458	0.053064	0.0451054
					1652.05	0.00189149	0.0530609	0.0451085
					1653.05	0.00188841	0.0530578	0.0451116
					1654.05	0.00188534	0.0530547	0.0451147
					1655.05	0.00188227	0.0530516	0.0451177
					1656.05	0.0018792	0.0530486	0.0451208
					1657.05	0.00187614	0.0530455	0.0451239
					1658.05	0.00187308	0.0530425	0.0451269
					1659.05	0.00187003	0.0530394	0.04513
					1660.05	0.00186699	0.0530364	0.045133
					1661.05	0.00186395	0.0530333	0.045136
					1662.05	0.00186091	0.0530303	0.0451391
					1663.05	0.00185788	0.0530273	0.0451421
					1664.05	0.00185486	0.0530242	0.0451451
					1665.05	0.00185184	0.0530212	0.0451482
					1666.05	0.00184882	0.0530182	0.0451512
					1667.05	0.00184581	0.0530152	0.0451542
					1668.05	0.00184281	0.0530122	0.0451572
					1669.05	0.00183981	0.0530092	0.0451602
					1670.05	0.00183682	0.0530062	0.0451632
					1671.05	0.00183383	0.0530032	0.0451662
					1672.05	0.00183084	0.0530002	0.0451692
					1673.05	0.00182786	0.0529973	0.0451721
					1674.05	0.00182489	0.0529943	0.0451751
					1675.05	0.00182192	0.0529913	0.0451781
					1676.05	0.00181896	0.0529883	0.045181
					1677.05	0.001816	0.0529854	0.045184
					1678.05	0.00181304	0.0529824	0.045187
					1679.05	0.00181009	0.0529795	0.0451899
					1680.05	0.00180715	0.0529765	0.0451928
					1681.05	0.00180421	0.0529736	0.0451958
					1682.05	0.00180128	0.0529707	0.0451987
					1683.05	0.00179835	0.0529677	0.0452017
					1684.05	0.00179542	0.0529648	0.0452046
					1685.05	0.0017925	0.0529619	0.0452075
					1686.05	0.00178959	0.052959	0.0452104
					1687.05	0.00178668	0.0529561	0.0452133
					1688.05	0.00178377	0.0529532	0.0452162
					1689.05	0.00178087	0.0529503	0.0452191
					1690.05	0.00177798	0.0529474	0.045222
					1691.05	0.00177509	0.0529445	0.0452249
					1692.05	0.0017722	0.0529416	0.0452278
					1693.05	0.00176932	0.0529387	0.0452307
					1694.05	0.00176645	0.0529358	0.0452335
					1695.05	0.00176358	0.052933	0.0452364
					1696.05	0.00176071	0.0529301	0.0452393
					1697.05	0.00175785	0.0529272	0.0452422
					1698.05	0.00175499	0.0529244	0.045245
					1699.05	0.00175214	0.0529215	0.0452479
					1700.05	0.00174929	0.0529187	0.0452507
					1701.05	0.00174645	0.0529158	0.0452535
					1702.05	0.00174361	0.052913	0.0452564
					1703.05	0.00174078	0.0529102	0.0452592
					1704.05	0.00173795	0.0529073	0.045262
					1705.05	0.00173513	0.0529045	0.0452649
					1706.05	0.00173231	0.0529017	0.0452677
					1707.05	0.0017295	0.0528989	0.0452705
					1708.05	0.00172669	0.0528961	0.0452733
					1709.05	0.00172389	0.0528933	0.0452761
					1710.05	0.00172109	0.0528905	0.0452789
					1711.05	0.00171829	0.0528877	0.0452817
					1712.05	0.0017155	0.0528849	0.0452845
					1713.05	0.00171272	0.0528821	0.0452873
					1714.05	0.00170994	0.0528793	0.0452901
					1715.05	0.00170716	0.0528766	0.0452928
					1716.05	0.00170439	0.0528738	0.0452956
					1717.05	0.00170162	0.052871	0.0452984
					1718.05	0.00169886	0.0528682	0.0453011
					1719.05	0.0016961	0.0528655	0.0453039
					1720.05	0.00169335	0.0528627	0.0453066
					1721.05	0.0016906	0.05286	0.0453094
					1722.05	0.00168786	0.0528572	0.0453121
					1723.05	0.00168512	0.0528545	0.0453149
					1724.05	0.00168238	0.0528518	0.0453176
					1725.05	0.00167965	0.052849	0.0453204
					1726.05	0.00167693	0.0528463	0.0453231
					1727.05	0.00167421	0.0528436	0.0453258
					1728.05	0.00167149	0.0528409	0.0453285
					1729.05	0.00166878	0.0528382	0.0453312
					1730.05	0.00166607	0.0528355	0.0453339
					1731.05	0.00166337	0.0528328	0.0453366
					1732.05	0.00166067	0.0528301	0.0453393
					1733.05	0.00165798	0.0528274	0.045342
					1734.05	0.00165529	0.0528247	0.0453447
					1735.05	0.00165261	0.052822	0.0453474
					1736.05	0.00164993	0.0528193	0.0453501
					1737.05	0.00164725	0.0528166	0.0453527
					1738.05	0.00164458	0.052814	0.0453554
					1739.05	0.00164191	0.0528113	0.0453581
					1740.05	0.00163925	0.0528086	0.0453607
					1741.05	0.00163659	0.052806	0.0453634
					1742.05	0.00163394	0.0528033	0.0453661
					1743.05	0.00163129	0.0528007	0.0453687
					1744.05	0.00162865	0.052798	0.0453713
					1745.05	0.00162601	0.0527954	0.045374
					1746.05	0.00162337	0.0527927	0.0453766
					1747.05	0.00162074	0.0527901	0.0453793
					1748.05	0.00161811	0.0527875	0.0453819
					1749.05	0.00161549	0.0527849	0.0453845
					1750.05	0.00161287	0.0527823	0.0453871
					1751.05	0.00161026	0.0527796	0.0453897
					1752.05	0.00160765	0.052777	0.0453923
					1753.05	0.00160504	0.0527744	0.045395
					1754.05	0.00160244	0.0527718	0.0453976
					1755.05	0.00159985	0.0527692	0.0454002
					1756.05	0.00159725	0.0527666	0.0454027
					1757.05	0.00159467	0.052764	0.0454053
					1758.05	0.00159208	0.0527615	0.0454079
					1759.05	0.0015895	0.0527589	0.0454105
					1760.05	0.00158693	0.0527563	0.0454131
					1761.05	0.00158436	0.0527537	0.0454156
					1762.05	0.00158179	0.0527512	0.0454182
					1763.05	0.00157923	0.0527486	0.0454208
					1764.05	0.00157667	0.0527461	0.0454233
					1765.05	0.00157412	0.0527435	0.0454259
					1766.05	0.00157157	0.052741	0.0454284
					1767.05	0.00156903	0.0527384	0.045431
					1768.05	0.00156649	0.0527359	0.0454335
					1769.05	0.00156395	0.0527333	0.045436
					1770.05	0.00156142	0.0527308	0.0454386
					1771.05	0.00155889	0.0527283	0.0454411
					1772.05	0.00155637	0.0527258	0.0454436
					1773.05	0.00155385	0.0527232	0.0454461
					1774.05	0.00155133	0.0527207	0.0454487
					1775.05	0.00154882	0.0527182	0.0454512
					1776.05	0.00154631	0.0527157	0.0454537
					1777.05	0.00154381	0.0527132	0.0454562
					1778.05	0.00154131	0.0527107	0.0454587
					1779.05	0.00153882	0.0527082	0.0454612
					1780.05	0.00153633	0.0527057	0.0454637
					1781.05	0.00153384	0.0527032	0.0454662
					1782.05	0.00153136	0.0527007	0.0454686
					1783.05	0.00152888	0.0526983	0.0454711
					1784.05	0.00152641	0.0526958	0.0454736
					1785.05	0.00152394	0.0526933	0.0454761
					1786.05	0.00152147	0.0526909	0.0454785
					1787.05	0.00151901	0.0526884	0.045481
					1788.05	0.00151656	0.0526859	0.0454834
					1789.05	0.0015141	0.0526835	0.0454859
					1790.05	0.00151165	0.052681	0.0454883
					1791.05	0.00150921	0.0526786	0.0454908
					1792.05	0.00150677	0.0526761	0.0454932
					1793.05	0.00150433	0.0526737	0.0454957
					1794.05	0.0015019	0.0526713	0.0454981
					1795.05	0.00149947	0.0526689	0.0455005
					1796.05	0.00149704	0.0526664	0.045503
					1797.05	0.00149462	0.052664	0.0455054
					1798.05	0.00149221	0.0526616	0.0455078
					1799.05	0.00148979	0.0526592	0.0455102
					1800.05	0.00148739	0.0526568	0.0455126
					1801.05	0.00148498	0.0526544	0.045515
					1802.05	0.00148258	0.052652	0.0455174
					1803.05	0.00148018	0.0526496	0.0455198
					1804.05	0.00147779	0.0526472	0.0455222
					1805.05	0.0014754	0.0526448	0.0455246
					1806.05	0.00147302	0.0526424	0.045527
					1807.05	0.00147064	0.05264	0.0455294
					1808.05	0.00146826	0.0526377	0.0455317
					1809.05	0.00146589	0.0526353	0.0455341
					1810.05	0.00146352	0.0526329	0.0455365
					1811.05	0.00146115	0.0526305	0.0455388
					1812.05	0.00145879	0.0526282	0.0455412
					1813.05	0.00145644	0.0526258	0.0455436
					1814.05	0.00145408	0.0526235	0.0455459
					1815.05	0.00145173	0.0526211	0.0455483
					1816.05	0.00144939	0.0526188	0.0455506
					1817.05	0.00144705	0.0526164	0.045553
					1818.05	0.00144471	0.0526141	0.0455553
					1819.05	0.00144238	0.0526118	0.0455576
					1820.05	0.00144005	0.0526094	0.04556
					1821.05	0.00143772	0.0526071	0.0455623
					1822.05	0.0014354	0.0526048	0.0455646
					1823.05	0.00143308	0.0526025	0.0455669
					1824.05	0.00143076	0.0526001	0.0455692
					1825.05	0.00142845	0.0525978	0.0455716
					1826.05	0.00142615	0.0525955	0.0455738
					1827.05	0.00142384	0.0525932	0.0455762
					1828.05	0.00142155	0.0525909	0.0455784
					1829.05	0.00141925	0.0525886	0.0455808
					1830.05	0.00141696	0.0525863	0.045583
					1831.05	0.00141467	0.0525841	0.0455853
					1832.05	0.00141239	0.0525818	0.0455876
					1833.05	0.00141011	0.0525795	0.0455899
					1834.05	0.00140783	0.0525772	0.0455922
					1835.05	0.00140556	0.0525749	0.0455944
					1836.05	0.00140329	0.0525727	0.0455967
					1837.05	0.00140102	0.0525704	0.045599
					1838.05	0.00139876	0.0525682	0.0456012
					1839.05	0.00139651	0.0525659	0.0456035
					1840.05	0.00139425	0.0525636	0.0456058
					1841.05	0.001392	0.0525614	0.045608
					1842.05	0.00138976	0.0525591	0.0456102
					1843.05	0.00138751	0.0525569	0.0456125
					1844.05	0.00138527	0.0525547	0.0456147
					1845.05	0.00138304	0.0525524	0.045617
					1846.05	0.00138081	0.0525502	0.0456192
					1847.05	0.00137858	0.052548	0.0456214
					1848.05	0.00137636	0.0525457	0.0456236
					1849.05	0.00137413	0.0525435	0.0456259
					1850.05	0.00137192	0.0525413	0.0456281
					1851.05	0.0013697	0.0525391	0.0456303
					1852.05	0.0013675	0.0525369	0.0456325
					1853.05	0.00136529	0.0525347	0.0456347
					1854.05	0.00136309	0.0525325	0.0456369
					1855.05	0.00136089	0.0525303	0.0456391
					1856.05	0.00135869	0.0525281	0.0456413
					1857.05	0.0013565	0.0525259	0.0456435
					1858.05	0.00135432	0.0525237	0.0456457
					1859.05	0.00135213	0.0525215	0.0456479
					1860.05	0.00134995	0.0525193	0.04565
					1861.05	0.00134777	0.0525172	0.0456522
					1862.05	0.0013456	0.052515	0.0456544
					1863.05	0.00134343	0.0525128	0.0456566
					1864.05	0.00134127	0.0525106	0.0456587
					1865.05	0.0013391	0.0525085	0.0456609
					1866.05	0.00133694	0.0525063	0.0456631
					1867.05	0.00133479	0.0525042	0.0456652
					1868.05	0.00133264	0.052502	0.0456674
					1869.05	0.00133049	0.0524999	0.0456695
					1870.05	0.00132835	0.0524977	0.0456717
					1871.05	0.0013262	0.0524956	0.0456738
					1872.05	0.00132407	0.0524934	0.0456759
					1873.05	0.00132193	0.0524913	0.0456781
					1874.05	0.0013198	0.0524892	0.0456802
					1875.05	0.00131768	0.0524871	0.0456823
					1876.05	0.00131555	0.0524849	0.0456845
					1877.05	0.00131343	0.0524828	0.0456866
					1878.05	0.00131132	0.0524807	0.0456887
					1879.05	0.0013092	0.0524786	0.0456908
					1880.05	0.00130709	0.0524765	0.0456929
					1881.05	0.00130499	0.0524744	0.045695
					1882.05	0.00130289	0.0524723	0.0456971
					1883.05	0.00130079	0.0524702	0.0456992
					1884.05	0.00129869	0.0524681	0.0457013
					1885.05	0.0012966	0.052466	0.0457034
					1886.05	0.00129451	0.0524639	0.0457055
					1887.05	0.00129242	0.0524618	0.0457076
					1888.05	0.00129034	0.0524597	0.0457097
					1889.05	0.00128827	0.0524577	0.0457117
					1890.05	0.00128619	0.0524556	0.0457138
					1891.05	0.00128412	0.0524535	0.0457159
					1892.05	0.00128205	0.0524514	0.045718
					1893.05	0.00127999	0.0524494	0.04572
					1894.05	0.00127793	0.0524473	0.0457221
					1895.05	0.00127587	0.0524452	0.0457241
					1896.05	0.00127381	0.0524432	0.0457262
					1897.05	0.00127176	0.0524411	0.0457282
					1898.05	0.00126971	0.0524391	0.0457303
					1899.05	0.00126767	0.0524371	0.0457323
					1900.05	0.00126563	0.052435	0.0457344
					1901.05	0.00126359	0.052433	0.0457364
					1902.05	0.00126156	0.0524309	0.0457384
					1903.05	0.00125953	0.0524289	0.0457405
					1904.05	0.0012575	0.0524269	0.0457425
					1905.05	0.00125548	0.0524249	0.0457445
					1906.05	0.00125345	0.0524228	0.0457465
					1907.05	0.00125144	0.0524208	0.0457486
					1908.05	0.00124942	0.0524188	0.0457506
					1909.05	0.00124741	0.0524168	0.0457526
					1910.05	0.0012454	0.0524148	0.0457546
					1911.05	0.0012434	0.0524128	0.0457566
					1912.05	0.0012414	0.0524108	0.0457586
					1913.05	0.0012394	0.0524088	0.0457606
					1914.05	0.00123741	0.0524068	0.0457626
					1915.05	0.00123542	0.0524048	0.0457646
					1916.05	0.00123343	0.0524028	0.0457666
					1917.05	0.00123144	0.0524008	0.0457686
					1918.05	0.00122946	0.0523988	0.0457705
					1919.05	0.00122749	0.0523969	0.0457725
					1920.05	0.00122551	0.0523949	0.0457745
					1921.05	0.00122354	0.0523929	0.0457765
					1922.05	0.00122157	0.052391	0.0457784
					1923.05	0.00121961	0.052389	0.0457804
					1924.05	0.00121764	0.052387	0.0457824
					1925.05	0.00121569	0.0523851	0.0457843
					1926.05	0.00121373	0.0523831	0.0457863
					1927.05	0.00121178	0.0523812	0.0457882
					1928.05	0.00120983	0.0523792	0.0457902
					1929.05	0.00120788	0.0523773	0.0457921
					1930.05	0.00120594	0.0523753	0.0457941
					1931.05	0.001204	0.0523734	0.045796
					1932.05	0.00120207	0.0523714	0.0457979
					1933.05	0.00120013	0.0523695	0.0457999
					1934.05	0.0011982	0.0523676	0.0458018
					1935.05	0.00119628	0.0523657	0.0458037
					1936.05	0.00119435	0.0523637	0.0458057
					1937.05	0.00119243	0.0523618	0.0458076
					1938.05	0.00119052	0.0523599	0.0458095
					1939.05	0.0011886	0.052358	0.0458114
					1940.05	0.00118669	0.0523561	0.0458133
					1941.05	0.00118479	0.0523542	0.0458152
					1942.05	0.00118288	0.0523523	0.0458171
					1943.05	0.00118098	0.0523504	0.045819
					1944.05	0.00117908	0.0523485	0.0458209
					1945.05	0.00117719	0.0523466	0.0458228
					1946.05	0.00117529	0.0523447	0.0458247
					1947.05	0.00117341	0.0523428	0.0458266
					1948.05	0.00117152	0.0523409	0.0458285
					1949.05	0.00116964	0.052339	0.0458304
					1950.05	0.00116776	0.0523371	0.0458322
					1951.05	0.00116588	0.0523353	0.0458341
					1952.05	0.00116401	0.0523334	0.045836
					1953.05	0.00116214	0.0523315	0.0458379
					1954.05	0.00116027	0.0523297	0.0458397
					1955.05	0.00115841	0.0523278	0.0458416
					1956.05	0.00115655	0.0523259	0.0458435
					1957.05	0.00115469	0.0523241	0.0458453
					1958.05	0.00115283	0.0523222	0.0458472
					1959.05	0.00115098	0.0523204	0.045849
					1960.05	0.00114913	0.0523185	0.0458509
					1961.05	0.00114729	0.0523167	0.0458527
					1962.05	0.00114544	0.0523148	0.0458546
					1963.05	0.0011436	0.052313	0.0458564
					1964.05	0.00114177	0.0523112	0.0458582
					1965.05	0.00113993	0.0523093	0.0458601
					1966.05	0.0011381	0.0523075	0.0458619
					1967.05	0.00113627	0.0523057	0.0458637
					1968.05	0.00113445	0.0523038	0.0458655
					1969.05	0.00113263	0.052302	0.0458674
					1970.05	0.00113081	0.0523002	0.0458692
					1971.05	0.00112899	0.0522984	0.045871
					1972.05	0.00112718	0.0522966	0.0458728
					1973.05	0.00112537	0.0522948	0.0458746
					1974.05	0.00112356	0.0522929	0.0458764
					1975.05	0.00112176	0.0522912	0.0458782
					1976.05	0.00111996	0.0522893	0.04588
[truncated: 1,024 more rows]

## Sheet: DABCO_1.5BuI_AcN_77.7C
					Measured and fit concentrations (molar) vs. time (seconds) for the reaction 1 DABCO + 1.5 BuI ® Bu-DABCO-I in acetonitrile-d3 at 77.7 C.
					The fit of the data was performed using a kinetic model of the reaction with the Berkeley-Madonna program.
TIME_BuI	BuI_MEAS	TIME_DABCO	DABCO_MEAS	TIME_BuDABCOI	BuDABCOI_MEAS	TIME_FIT	DABCO_FIT	BuI_FIT	BuDABCOI_FIT		Berkeley-Madonna Model
85.36	0.0968	0	0.0573	0	0	0	0.0467369	0.1197	0		METHOD STIFF
169.72	0.0855	85.36	0.0262	1	0.00375	1e-06	0.0467369	0.1197	0
254.07	0.0803	169.72	0.0151	85.36	0.0233	3e-06	0.0467369	0.1197	0		STARTTIME = 0
338.43	0.0765	254.07	0.00938	169.72	0.0323	7e-06	0.0467369	0.1197	0		STOPTIME = 1200
422.79	0.0773	338.43	0.00575	254.07	0.0375	1.5e-05	0.0467369	0.1197	1e-08		DT = 0.02
507.15	0.0735	422.79	0.00384	338.43	0.0405	3.1e-05	0.0467369	0.1197	1e-08
591.5	0.075	507.15	0.00256	422.79	0.0435	6.3e-05	0.0467369	0.1197	3e-08		{RXN1: DABCO + 2.5 BuI --> BuDABCOI + 1.5 BuI}
675.86	0.0743	591.5	0.0017	507.15	0.0435	0.000127	0.0467369	0.1197	5e-08
760.22	0.0743	675.86	0.00107	591.5	0.045	0.000255	0.0467368	0.119699	1e-07		RXN1 = K1f*DABCO*BuI - K1r*BuDABCOI
844.58	0.075	760.22	0.000852	675.86	0.0458	0.000511	0.0467367	0.119699	2.1e-07
1168.94	0.0743	844.58	0.000426	760.22	0.0458	0.001023	0.0467365	0.119699	4.1e-07		K1f = 0.07181
		1168.94	0.000426	844.58	0.0465	0.002047	0.0467361	0.119699	8.2e-07		K1r = 0
				1168.94	0.0465	0.004095	0.0467353	0.119698	1.65e-06
						0.008191	0.0467336	0.119696	3.29e-06		d/dt(DABCO) = -RXN1
						0.016383	0.0467303	0.119693	6.58e-06		d/dt(BuI) = -RXN1
						0.032767	0.0467238	0.119686	1.316e-05		d/dt(BuDABCOI) = RXN1
						0.065535	0.0467106	0.119673	2.632e-05
						0.131071	0.0466843	0.119647	5.262e-05		INIT BuI = 0.1197
						0.262143	0.0466318	0.119594	0.00010515		INIT DABCO = 0.04647
						0.524287	0.0465269	0.11949	0.00020998		INIT BuDABCOI = 0
						1.04858	0.0463183	0.119281	0.00041865
						2.04858	0.0459239	0.118887	0.00081307
						3.04858	0.0455341	0.118497	0.00120284		Name	Value
						4.04857	0.0451489	0.118112	0.00158806		STARTTIME	0
						5.04857	0.0447681	0.117731	0.00196878		STOPTIME	1200
						6.04857	0.0443918	0.117354	0.00234509		DTMIN	1e-06
						7.04857	0.0440199	0.116983	0.00271705		DTMAX	1
						8.04857	0.0436522	0.116615	0.00308473		DTOUT	0
						9.04857	0.0432887	0.116251	0.00344821		TOLERANCE	0.01
						10.0486	0.0429294	0.115892	0.00380755		K1f *	0.07181
						11.0486	0.0425741	0.115537	0.00416281		K1r	0
						12.0486	0.0422229	0.115186	0.00451406		INIT DABCO *	0.04674
						13.0486	0.0418756	0.114838	0.00486136		INIT BuI *	0.1197
						14.0486	0.0415321	0.114495	0.00520478		INIT BuDABCOI	0
						15.0486	0.0411926	0.114155	0.00554437
						16.0486	0.0408567	0.113819	0.00588019
						17.0486	0.0405246	0.113487	0.0062123
						18.0486	0.0401962	0.113159	0.00654076
						19.0486	0.0398713	0.112834	0.00686562
						20.0486	0.03955	0.112513	0.00718693
						21.0486	0.0392322	0.112195	0.00750476
						22.0486	0.0389178	0.11188	0.00781915
						23.0486	0.0386068	0.111569	0.00813016
						24.0486	0.0382991	0.111262	0.00843783
						25.0486	0.0379947	0.110957	0.00874221
						26.0486	0.0376936	0.110656	0.00904335
						27.0486	0.0373956	0.110358	0.0093413
						28.0486	0.0371008	0.110063	0.00963611
						29.0486	0.0368091	0.109772	0.00992781
						30.0486	0.0365205	0.109483	0.0102165
						31.0486	0.0362348	0.109197	0.0105021
						32.0486	0.0359521	0.108915	0.0107848
						33.0486	0.0356724	0.108635	0.0110645
						34.0486	0.0353955	0.108358	0.0113414
						35.0486	0.0351215	0.108084	0.0116154
						36.0486	0.0348503	0.107813	0.0118866
						37.0486	0.0345818	0.107544	0.0121551
						38.0486	0.0343161	0.107279	0.0124208
						39.0486	0.0340531	0.107016	0.0126838
						40.0486	0.0337927	0.106755	0.0129442
						41.0486	0.0335349	0.106498	0.013202
						42.0486	0.0332797	0.106242	0.0134572
						43.0486	0.0330271	0.10599	0.0137099
						44.0486	0.0327769	0.10574	0.01396
						45.0486	0.0325293	0.105492	0.0142077
						46.0486	0.0322841	0.105247	0.0144529
						47.0486	0.0320412	0.105004	0.0146957
						48.0486	0.0318008	0.104763	0.0149361
						49.0486	0.0315627	0.104525	0.0151742
						50.0486	0.0313269	0.10429	0.01541
						51.0486	0.0310935	0.104056	0.0156434
						52.0486	0.0308622	0.103825	0.0158747
						53.0486	0.0306332	0.103596	0.0161037
						54.0486	0.0304064	0.103369	0.0163305
						55.0486	0.0301818	0.103144	0.0165551
						56.0486	0.0299593	0.102922	0.0167776
						57.0486	0.0297389	0.102702	0.016998
						58.0486	0.0295206	0.102483	0.0172163
						59.0486	0.0293044	0.102267	0.0174326
						60.0486	0.0290902	0.102053	0.0176468
						61.0486	0.028878	0.101841	0.017859
						62.0486	0.0286677	0.10163	0.0180692
						63.0486	0.0284595	0.101422	0.0182774
						64.0486	0.0282532	0.101216	0.0184838
						65.0486	0.0280488	0.101011	0.0186882
						66.0486	0.0278462	0.100809	0.0188907
						67.0486	0.0276456	0.100608	0.0190914
						68.0486	0.0274467	0.100409	0.0192902
						69.0486	0.0272497	0.100212	0.0194872
						70.0486	0.0270545	0.100017	0.0196824
						71.0486	0.0268611	0.0998237	0.0198759
						72.0486	0.0266694	0.099632	0.0200675
						73.0486	0.0264794	0.0994421	0.0202575
						74.0486	0.0262912	0.0992538	0.0204457
						75.0486	0.0261046	0.0990673	0.0206323
						76.0486	0.0259197	0.0988824	0.0208172
						77.0486	0.0257365	0.0986991	0.0210004
						78.0486	0.0255549	0.0985175	0.021182
						79.0486	0.0253749	0.0983375	0.021362
						80.0486	0.0251965	0.0981591	0.0215404
						81.0486	0.0250197	0.0979823	0.0217173
						82.0486	0.0248444	0.097807	0.0218925
						83.0486	0.0246706	0.0976333	0.0220663
						84.0486	0.0244984	0.0974611	0.0222385
						85.0486	0.0243277	0.0972903	0.0224092
						86.0486	0.0241585	0.0971211	0.0225785
						87.0486	0.0239907	0.0969533	0.0227462
						88.0486	0.0238244	0.096787	0.0229125
						89.0486	0.0236595	0.0966222	0.0230774
						90.0486	0.023496	0.0964587	0.0232409
						91.0486	0.023334	0.0962966	0.0234029
						92.0486	0.0231733	0.096136	0.0235636
						93.0486	0.023014	0.0959766	0.0237229
						94.0486	0.022856	0.0958187	0.0238809
						95.0486	0.0226994	0.0956621	0.0240375
						96.0486	0.0225442	0.0955068	0.0241928
						97.0486	0.0223902	0.0953528	0.0243467
						98.0486	0.0222375	0.0952002	0.0244994
						99.0486	0.0220861	0.0950488	0.0246508
						100.049	0.021936	0.0948987	0.0248009
						101.049	0.0217871	0.0947498	0.0249498
						102.049	0.0216395	0.0946021	0.0250974
						103.049	0.0214931	0.0944558	0.0252438
						104.049	0.0213479	0.0943106	0.025389
						105.049	0.0212039	0.0941666	0.025533
						106.049	0.0210611	0.0940238	0.0256758
						107.049	0.0209195	0.0938821	0.0258174
						108.049	0.020779	0.0937417	0.0259579
						109.049	0.0206397	0.0936024	0.0260972
						110.049	0.0205016	0.0934642	0.0262354
						111.049	0.0203645	0.0933272	0.0263724
						112.049	0.0202286	0.0931912	0.0265083
						113.049	0.0200937	0.0930564	0.0266432
						114.049	0.01996	0.0929227	0.0267769
						115.049	0.0198273	0.09279	0.0269096
						116.049	0.0196958	0.0926584	0.0270412
						117.049	0.0195652	0.0925279	0.0271717
						118.049	0.0194357	0.0923984	0.0273012
						119.049	0.0193073	0.0922699	0.0274296
						120.049	0.0191799	0.0921425	0.0275571
						121.049	0.0190534	0.0920161	0.0276835
						122.049	0.018928	0.0918907	0.0278089
						123.049	0.0188036	0.0917663	0.0279333
						124.049	0.0186802	0.0916429	0.0280567
						125.049	0.0185578	0.0915204	0.0281792
						126.049	0.0184363	0.0913989	0.0283007
						127.049	0.0183157	0.0912784	0.0284212
						128.049	0.0181961	0.0911588	0.0285408
						129.049	0.0180775	0.0910401	0.0286594
						130.049	0.0179598	0.0909224	0.0287772
						131.049	0.0178429	0.0908056	0.028894
						132.049	0.017727	0.0906897	0.0290099
						133.049	0.017612	0.0905747	0.0291249
						134.049	0.0174979	0.0904606	0.029239
						135.049	0.0173847	0.0903473	0.0293522
						136.049	0.0172723	0.090235	0.0294646
						137.049	0.0171608	0.0901235	0.0295761
						138.049	0.0170502	0.0900128	0.0296867
						139.049	0.0169404	0.089903	0.0297965
						140.049	0.0168314	0.0897941	0.0299055
						141.049	0.0167233	0.089686	0.0300136
						142.049	0.016616	0.0895787	0.0301209
						143.049	0.0165095	0.0894722	0.0302274
						144.049	0.0164039	0.0893665	0.0303331
						145.049	0.016299	0.0892616	0.0304379
						146.049	0.0161949	0.0891575	0.030542
						147.049	0.0160916	0.0890542	0.0306453
						148.049	0.0159891	0.0889517	0.0307479
						149.049	0.0158873	0.08885	0.0308496
						150.049	0.0157863	0.088749	0.0309506
						151.049	0.0156861	0.0886487	0.0310508
						152.049	0.0155866	0.0885492	0.0311503
						153.049	0.0154878	0.0884505	0.0312491
						154.049	0.0153898	0.0883525	0.0313471
						155.049	0.0152926	0.0882552	0.0314444
						156.049	0.015196	0.0881586	0.0315409
						157.049	0.0151001	0.0880628	0.0316368
						158.049	0.015005	0.0879676	0.0317319
						159.049	0.0149105	0.0878732	0.0318264
						160.049	0.0148168	0.0877794	0.0319201
						161.049	0.0147237	0.0876864	0.0320132
						162.049	0.0146314	0.087594	0.0321056
						163.049	0.0145397	0.0875023	0.0321973
						164.049	0.0144486	0.0874113	0.0322883
						165.049	0.0143583	0.0873209	0.0323787
						166.049	0.0142685	0.0872312	0.0324684
						167.049	0.0141795	0.0871421	0.0325574
						168.049	0.0140911	0.0870537	0.0326458
						169.049	0.0140033	0.086966	0.0327336
						170.049	0.0139162	0.0868788	0.0328208
						171.049	0.0138297	0.0867923	0.0329073
						172.049	0.0137438	0.0867064	0.0329932
						173.049	0.0136585	0.0866211	0.0330784
						174.049	0.0135738	0.0865365	0.0331631
						175.049	0.0134898	0.0864524	0.0332472
						176.049	0.0134063	0.086369	0.0333306
						177.049	0.0133235	0.0862861	0.0334134
						178.049	0.0132412	0.0862039	0.0334957
						179.049	0.0131595	0.0861222	0.0335774
						180.049	0.0130784	0.0860411	0.0336585
						181.049	0.0129979	0.0859606	0.033739
						182.049	0.0129179	0.0858806	0.033819
						183.049	0.0128386	0.0858012	0.0338984
						184.049	0.0127597	0.0857224	0.0339772
						185.049	0.0126815	0.0856441	0.0340555
						186.049	0.0126037	0.0855664	0.0341332
						187.049	0.0125266	0.0854892	0.0342104
						188.049	0.0124499	0.0854126	0.034287
						189.049	0.0123738	0.0853365	0.0343631
						190.049	0.0122983	0.0852609	0.0344387
						191.049	0.0122232	0.0851859	0.0345137
						192.049	0.0121487	0.0851114	0.0345882
						193.049	0.0120747	0.0850374	0.0346622
						194.049	0.0120012	0.0849639	0.0347357
						195.049	0.0119282	0.0848909	0.0348087
						196.049	0.0118558	0.0848184	0.0348811
						197.049	0.0117838	0.0847465	0.0349531
						198.049	0.0117123	0.084675	0.0350246
						199.049	0.0116414	0.084604	0.0350956
						200.049	0.0115709	0.0845335	0.035166
						201.049	0.0115009	0.0844635	0.035236
						202.049	0.0114314	0.084394	0.0353056
						203.049	0.0113623	0.084325	0.0353746
						204.049	0.0112937	0.0842564	0.0354432
						205.049	0.0112257	0.0841883	0.0355113
						206.049	0.011158	0.0841207	0.0355789
						207.049	0.0110908	0.0840535	0.0356461
						208.049	0.0110241	0.0839868	0.0357128
						209.049	0.0109578	0.0839205	0.0357791
						210.049	0.010892	0.0838547	0.0358449
						211.049	0.0108267	0.0837893	0.0359103
						212.049	0.0107617	0.0837244	0.0359752
						213.049	0.0106973	0.0836599	0.0360397
						214.049	0.0106332	0.0835959	0.0361037
						215.049	0.0105696	0.0835322	0.0361673
						216.049	0.0105064	0.0834691	0.0362305
						217.049	0.0104436	0.0834063	0.0362933
						218.049	0.0103813	0.0833439	0.0363556
						219.049	0.0103193	0.083282	0.0364176
						220.049	0.0102578	0.0832205	0.0364791
						221.049	0.0101967	0.0831594	0.0365402
						222.049	0.0101361	0.0830987	0.0366009
						223.049	0.0100758	0.0830384	0.0366612
						224.049	0.0100159	0.0829785	0.036721
						225.049	0.00995639	0.082919	0.0367805
						226.049	0.0098973	0.08286	0.0368396
						227.049	0.0098386	0.0828013	0.0368983
						228.049	0.0097803	0.0827429	0.0369566
						229.049	0.00972237	0.082685	0.0370146
						230.049	0.00966483	0.0826275	0.0370721
						231.049	0.00960767	0.0825703	0.0371293
						232.049	0.00955089	0.0825135	0.037186
						233.049	0.00949448	0.0824571	0.0372424
						234.049	0.00943844	0.0824011	0.0372985
						235.049	0.00938277	0.0823454	0.0373542
						236.049	0.00932747	0.0822901	0.0374094
						237.049	0.00927253	0.0822352	0.0374644
						238.049	0.00921795	0.0821806	0.037519
						239.049	0.00916373	0.0821264	0.0375732
						240.049	0.00910986	0.0820725	0.0376271
						241.049	0.00905634	0.082019	0.0376806
						242.049	0.00900317	0.0819658	0.0377338
						243.049	0.00895035	0.081913	0.0377866
						244.049	0.00889787	0.0818605	0.0378391
						245.049	0.00884573	0.0818084	0.0378912
						246.049	0.00879393	0.0817566	0.037943
						247.049	0.00874246	0.0817051	0.0379945
						248.049	0.00869133	0.081654	0.0380456
						249.049	0.00864053	0.0816032	0.0380964
						250.049	0.00859006	0.0815527	0.0381469
						251.049	0.00853991	0.0815026	0.038197
						252.049	0.00849009	0.0814528	0.0382468
						253.049	0.00844059	0.0814032	0.0382963
						254.049	0.0083914	0.0813541	0.0383455
						255.049	0.00834254	0.0813052	0.0383944
						256.049	0.00829398	0.0812566	0.0384429
						257.049	0.00824574	0.0812084	0.0384912
						258.049	0.0081978	0.0811605	0.0385391
						259.049	0.00815018	0.0811128	0.0385868
						260.049	0.00810285	0.0810655	0.0386341
						261.049	0.00805583	0.0810185	0.0386811
						262.049	0.00800911	0.0809718	0.0387278
						263.049	0.00796269	0.0809253	0.0387742
						264.049	0.00791656	0.0808792	0.0388204
						265.049	0.00787072	0.0808334	0.0388662
						266.049	0.00782518	0.0807878	0.0389117
						267.049	0.00777992	0.0807426	0.038957
						268.049	0.00773495	0.0806976	0.039002
						269.049	0.00769027	0.0806529	0.0390467
						270.049	0.00764587	0.0806085	0.0390911
						271.049	0.00760175	0.0805644	0.0391352
						272.049	0.00755791	0.0805206	0.039179
						273.049	0.00751434	0.080477	0.0392226
						274.049	0.00747105	0.0804337	0.0392659
						275.049	0.00742803	0.0803907	0.0393089
						276.049	0.00738528	0.0803479	0.0393516
						277.049	0.0073428	0.0803055	0.0393941
						278.049	0.00730059	0.0802632	0.0394363
						279.049	0.00725864	0.0802213	0.0394783
						280.049	0.00721695	0.0801796	0.03952
						281.049	0.00717553	0.0801382	0.0395614
						282.049	0.00713436	0.080097	0.0396026
						283.049	0.00709345	0.0800561	0.0396435
						284.049	0.0070528	0.0800155	0.0396841
						285.049	0.0070124	0.0799751	0.0397245
						286.049	0.00697225	0.0799349	0.0397647
						287.049	0.00693235	0.079895	0.0398046
						288.049	0.0068927	0.0798554	0.0398442
						289.049	0.00685329	0.0798159	0.0398836
						290.049	0.00681413	0.0797768	0.0399228
						291.049	0.00677521	0.0797379	0.0399617
						292.049	0.00673654	0.0796992	0.0400004
						293.049	0.0066981	0.0796608	0.0400388
						294.049	0.0066599	0.0796226	0.040077
						295.049	0.00662194	0.0795846	0.040115
						296.049	0.00658421	0.0795469	0.0401527
						297.049	0.00654671	0.0795094	0.0401902
						298.049	0.00650944	0.0794721	0.0402275
						299.049	0.00647241	0.0794351	0.0402645
						300.049	0.0064356	0.0793983	0.0403013
						301.049	0.00639902	0.0793617	0.0403379
						302.049	0.00636266	0.0793253	0.0403743
						303.049	0.00632652	0.0792892	0.0404104
						304.049	0.00629061	0.0792533	0.0404463
						305.049	0.00625492	0.0792176	0.040482
						306.049	0.00621944	0.0791821	0.0405175
						307.049	0.00618418	0.0791468	0.0405527
						308.049	0.00614914	0.0791118	0.0405878
						309.049	0.00611431	0.079077	0.0406226
						310.049	0.0060797	0.0790423	0.0406572
						311.049	0.00604529	0.0790079	0.0406916
						312.049	0.0060111	0.0789737	0.0407258
						313.049	0.00597711	0.0789398	0.0407598
						314.049	0.00594333	0.078906	0.0407936
						315.049	0.00590975	0.0788724	0.0408272
						316.049	0.00587638	0.078839	0.0408605
						317.049	0.00584321	0.0788059	0.0408937
						318.049	0.00581024	0.0787729	0.0409267
						319.049	0.00577747	0.0787401	0.0409595
						320.049	0.0057449	0.0787076	0.040992
						321.049	0.00571253	0.0786752	0.0410244
						322.049	0.00568035	0.078643	0.0410566
						323.049	0.00564836	0.078611	0.0410886
						324.049	0.00561657	0.0785792	0.0411203
						325.049	0.00558497	0.0785476	0.0411519
						326.049	0.00555357	0.0785162	0.0411834
						327.049	0.00552235	0.078485	0.0412146
						328.049	0.00549131	0.078454	0.0412456
						329.049	0.00546047	0.0784231	0.0412765
						330.049	0.00542981	0.0783925	0.0413071
						331.049	0.00539933	0.078362	0.0413376
						332.049	0.00536904	0.0783317	0.0413679
						333.049	0.00533893	0.0783016	0.041398
						334.049	0.00530899	0.0782716	0.0414279
						335.049	0.00527924	0.0782419	0.0414577
						336.049	0.00524967	0.0782123	0.0414873
						337.049	0.00522027	0.0781829	0.0415167
						338.049	0.00519105	0.0781537	0.0415459
						339.049	0.005162	0.0781247	0.0415749
						340.049	0.00513312	0.0780958	0.0416038
						341.049	0.00510442	0.0780671	0.0416325
						342.049	0.00507589	0.0780385	0.041661
						343.049	0.00504753	0.0780102	0.0416894
						344.049	0.00501933	0.077982	0.0417176
						345.049	0.00499131	0.077954	0.0417456
						346.049	0.00496345	0.0779261	0.0417735
						347.049	0.00493575	0.0778984	0.0418012
						348.049	0.00490822	0.0778709	0.0418287
						349.049	0.00488086	0.0778435	0.0418561
						350.049	0.00485365	0.0778163	0.0418833
						351.049	0.00482661	0.0777893	0.0419103
						352.049	0.00479973	0.0777624	0.0419372
						353.049	0.004773	0.0777357	0.0419639
						354.049	0.00474644	0.0777091	0.0419905
						355.049	0.00472003	0.0776827	0.0420169
						356.049	0.00469377	0.0776564	0.0420432
						357.049	0.00466767	0.0776303	0.0420693
						358.049	0.00464173	0.0776044	0.0420952
						359.049	0.00461594	0.0775786	0.042121
						360.049	0.00459029	0.0775529	0.0421466
						361.049	0.0045648	0.0775275	0.0421721
						362.049	0.00453946	0.0775021	0.0421975
						363.049	0.00451427	0.0774769	0.0422227
						364.049	0.00448923	0.0774519	0.0422477
						365.049	0.00446433	0.077427	0.0422726
						366.049	0.00443958	0.0774022	0.0422973
						367.049	0.00441498	0.0773776	0.0423219
						368.049	0.00439052	0.0773532	0.0423464
						369.049	0.0043662	0.0773289	0.0423707
						370.049	0.00434202	0.0773047	0.0423949
						371.049	0.00431799	0.0772806	0.0424189
						372.049	0.00429409	0.0772567	0.0424428
						373.049	0.00427034	0.077233	0.0424666
						374.049	0.00424672	0.0772094	0.0424902
						375.049	0.00422324	0.0771859	0.0425137
						376.049	0.0041999	0.0771626	0.042537
						377.049	0.0041767	0.0771393	0.0425602
						378.049	0.00415363	0.0771163	0.0425833
						379.049	0.00413069	0.0770934	0.0426062
						380.049	0.00410789	0.0770705	0.042629
						381.049	0.00408522	0.0770479	0.0426517
						382.049	0.00406268	0.0770253	0.0426742
						383.049	0.00404027	0.0770029	0.0426967
						384.049	0.004018	0.0769806	0.0427189
						385.049	0.00399585	0.0769585	0.0427411
						386.049	0.00397383	0.0769365	0.0427631
						387.049	0.00395194	0.0769146	0.042785
						388.049	0.00393017	0.0768928	0.0428067
						389.049	0.00390853	0.0768712	0.0428284
						390.049	0.00388702	0.0768497	0.0428499
						391.049	0.00386563	0.0768283	0.0428713
						392.049	0.00384436	0.076807	0.0428926
						393.049	0.00382322	0.0767859	0.0429137
						394.049	0.00380219	0.0767648	0.0429347
						395.049	0.00378129	0.076744	0.0429556
						396.049	0.00376051	0.0767232	0.0429764
						397.049	0.00373985	0.0767025	0.0429971
						398.049	0.00371931	0.076682	0.0430176
						399.049	0.00369889	0.0766615	0.043038
						400.049	0.00367859	0.0766412	0.0430583
						401.049	0.0036584	0.076621	0.0430785
						402.049	0.00363832	0.076601	0.0430986
						403.049	0.00361837	0.076581	0.0431186
						404.049	0.00359853	0.0765612	0.0431384
						405.049	0.0035788	0.0765414	0.0431581
						406.049	0.00355918	0.0765218	0.0431777
						407.049	0.00353968	0.0765023	0.0431972
						408.049	0.00352029	0.0764829	0.0432166
						409.049	0.00350101	0.0764637	0.0432359
						410.049	0.00348184	0.0764445	0.0432551
						411.049	0.00346278	0.0764254	0.0432741
						412.049	0.00344383	0.0764065	0.0432931
						413.049	0.00342499	0.0763876	0.0433119
						414.049	0.00340625	0.0763689	0.0433307
						415.049	0.00338762	0.0763503	0.0433493
						416.049	0.0033691	0.0763318	0.0433678
						417.049	0.00335069	0.0763133	0.0433862
						418.049	0.00333237	0.076295	0.0434046
						419.049	0.00331417	0.0762768	0.0434228
						420.049	0.00329607	0.0762587	0.0434409
						421.049	0.00327807	0.0762407	0.0434589
						422.049	0.00326017	0.0762228	0.0434768
						423.049	0.00324238	0.076205	0.0434945
						424.049	0.00322468	0.0761873	0.0435122
						425.049	0.00320709	0.0761697	0.0435298
						426.049	0.0031896	0.0761523	0.0435473
						427.049	0.0031722	0.0761349	0.0435647
						428.049	0.00315491	0.0761176	0.043582
						429.049	0.00313771	0.0761004	0.0435992
						430.049	0.00312061	0.0760833	0.0436163
						431.049	0.00310361	0.0760663	0.0436333
						432.049	0.0030867	0.0760494	0.0436502
						433.049	0.00306989	0.0760326	0.043667
						434.049	0.00305318	0.0760158	0.0436838
						435.049	0.00303656	0.0759992	0.0437004
						436.049	0.00302003	0.0759827	0.0437169
						437.049	0.0030036	0.0759662	0.0437333
						438.049	0.00298726	0.0759499	0.0437497
						439.049	0.00297101	0.0759337	0.0437659
						440.049	0.00295486	0.0759175	0.0437821
						441.049	0.00293879	0.0759014	0.0437981
						442.049	0.00292282	0.0758855	0.0438141
						443.049	0.00290694	0.0758696	0.04383
						444.049	0.00289114	0.0758538	0.0438458
						445.049	0.00287544	0.0758381	0.0438615
						446.049	0.00285982	0.0758225	0.0438771
						447.049	0.00284429	0.0758069	0.0438926
						448.049	0.00282885	0.0757915	0.0439081
						449.049	0.0028135	0.0757762	0.0439234
						450.049	0.00279823	0.0757609	0.0439387
						451.049	0.00278305	0.0757457	0.0439539
						452.049	0.00276795	0.0757306	0.043969
						453.049	0.00275294	0.0757156	0.043984
						454.049	0.00273802	0.0757007	0.0439989
						455.049	0.00272317	0.0756858	0.0440137
						456.049	0.00270841	0.0756711	0.0440285
						457.049	0.00269374	0.0756564	0.0440432
						458.049	0.00267914	0.0756418	0.0440578
						459.049	0.00266463	0.0756273	0.0440723
						460.049	0.0026502	0.0756128	0.0440867
						461.049	0.00263585	0.0755985	0.0441011
						462.049	0.00262158	0.0755842	0.0441153
						463.049	0.00260739	0.07557	0.0441295
						464.049	0.00259328	0.0755559	0.0441436
						465.049	0.00257924	0.0755419	0.0441577
						466.049	0.00256529	0.0755279	0.0441716
						467.049	0.00255142	0.0755141	0.0441855
						468.049	0.00253762	0.0755003	0.0441993
						469.049	0.0025239	0.0754865	0.044213
						470.049	0.00251025	0.0754729	0.0442267
						471.049	0.00249669	0.0754593	0.0442402
						472.049	0.00248319	0.0754458	0.0442537
						473.049	0.00246978	0.0754324	0.0442671
						474.049	0.00245644	0.0754191	0.0442805
						475.049	0.00244317	0.0754058	0.0442937
						476.049	0.00242998	0.0753926	0.0443069
						477.049	0.00241686	0.0753795	0.0443201
						478.049	0.00240381	0.0753665	0.0443331
						479.049	0.00239083	0.0753535	0.0443461
						480.049	0.00237793	0.0753406	0.044359
						481.049	0.0023651	0.0753278	0.0443718
						482.049	0.00235234	0.075315	0.0443846
						483.049	0.00233966	0.0753023	0.0443973
						484.049	0.00232704	0.0752897	0.0444099
						485.049	0.00231449	0.0752772	0.0444224
						486.049	0.00230202	0.0752647	0.0444349
						487.049	0.00228961	0.0752523	0.0444473
						488.049	0.00227727	0.0752399	0.0444597
						489.049	0.002265	0.0752276	0.0444719
						490.049	0.0022528	0.0752155	0.0444841
						491.049	0.00224066	0.0752033	0.0444963
						492.049	0.00222859	0.0751913	0.0445083
						493.049	0.00221659	0.0751793	0.0445203
						494.049	0.00220466	0.0751673	0.0445323
						495.049	0.00219279	0.0751554	0.0445441
						496.049	0.00218099	0.0751436	0.0445559
						497.049	0.00216925	0.0751319	0.0445677
						498.049	0.00215758	0.0751202	0.0445793
						499.049	0.00214597	0.0751086	0.0445909
						500.049	0.00213443	0.0750971	0.0446025
						501.049	0.00212295	0.0750856	0.044614
						502.049	0.00211153	0.0750742	0.0446254
						503.049	0.00210018	0.0750628	0.0446367
						504.049	0.00208889	0.0750515	0.044648
						505.049	0.00207766	0.0750403	0.0446593
						506.049	0.0020665	0.0750292	0.0446704
						507.049	0.0020554	0.0750181	0.0446815
						508.049	0.00204435	0.075007	0.0446926
						509.049	0.00203337	0.074996	0.0447036
						510.049	0.00202245	0.0749851	0.0447145
						511.049	0.00201159	0.0749742	0.0447253
						512.049	0.00200079	0.0749634	0.0447361
						513.049	0.00199005	0.0749527	0.0447469
						514.049	0.00197936	0.074942	0.0447576
						515.049	0.00196874	0.0749314	0.0447682
						516.049	0.00195818	0.0749208	0.0447787
						517.049	0.00194767	0.0749103	0.0447893
						518.049	0.00193722	0.0748999	0.0447997
						519.049	0.00192683	0.0748895	0.0448101
						520.049	0.00191649	0.0748792	0.0448204
						521.049	0.00190622	0.0748689	0.0448307
						522.049	0.001896	0.0748586	0.0448409
						523.049	0.00188583	0.0748485	0.0448511
						524.049	0.00187572	0.0748384	0.0448612
						525.049	0.00186567	0.0748283	0.0448713
						526.049	0.00185567	0.0748183	0.0448812
						527.049	0.00184573	0.0748084	0.0448912
						528.049	0.00183584	0.0747985	0.0449011
						529.049	0.00182601	0.0747887	0.0449109
						530.049	0.00181623	0.0747789	0.0449207
						531.049	0.0018065	0.0747692	0.0449304
						532.049	0.00179683	0.0747595	0.0449401
						533.049	0.00178721	0.0747499	0.0449497
						534.049	0.00177764	0.0747403	0.0449593
						535.049	0.00176812	0.0747308	0.0449688
						536.049	0.00175866	0.0747213	0.0449783
						537.049	0.00174925	0.0747119	0.0449877
						538.049	0.00173989	0.0747025	0.044997
						539.049	0.00173058	0.0746932	0.0450063
						540.049	0.00172132	0.074684	0.0450156
						541.049	0.00171212	0.0746748	0.0450248
						542.049	0.00170296	0.0746656	0.045034
						543.049	0.00169385	0.0746565	0.0450431
						544.049	0.0016848	0.0746475	0.0450521
						545.049	0.00167579	0.0746384	0.0450611
						546.049	0.00166683	0.0746295	0.0450701
						547.049	0.00165792	0.0746206	0.045079
						548.049	0.00164906	0.0746117	0.0450879
						549.049	0.00164025	0.0746029	0.0450967
						550.049	0.00163149	0.0745941	0.0451054
						551.049	0.00162277	0.0745854	0.0451141
						552.049	0.0016141	0.0745768	0.0451228
						553.049	0.00160548	0.0745681	0.0451314
						554.049	0.00159691	0.0745596	0.04514
						555.049	0.00158838	0.074551	0.0451485
						556.049	0.0015799	0.0745425	0.045157
						557.049	0.00157147	0.0745341	0.0451655
						558.049	0.00156308	0.0745257	0.0451739
						559.049	0.00155473	0.0745174	0.0451822
						560.049	0.00154644	0.0745091	0.0451905
						561.049	0.00153818	0.0745008	0.0451987
						562.049	0.00152998	0.0744926	0.045207
						563.049	0.00152181	0.0744845	0.0452151
						564.049	0.0015137	0.0744763	0.0452232
						565.049	0.00150562	0.0744683	0.0452313
						566.049	0.00149759	0.0744603	0.0452393
						567.049	0.00148961	0.0744523	0.0452473
						568.049	0.00148166	0.0744443	0.0452553
						569.049	0.00147376	0.0744364	0.0452632
						570.049	0.00146591	0.0744286	0.045271
						571.049	0.00145809	0.0744207	0.0452788
						572.049	0.00145032	0.074413	0.0452866
						573.049	0.00144259	0.0744053	0.0452943
						574.049	0.00143491	0.0743976	0.045302
						575.049	0.00142726	0.0743899	0.0453097
						576.049	0.00141966	0.0743823	0.0453173
						577.049	0.00141209	0.0743748	0.0453248
						578.049	0.00140457	0.0743672	0.0453324
						579.049	0.00139709	0.0743598	0.0453398
						580.049	0.00138965	0.0743523	0.0453473
						581.049	0.00138225	0.0743449	0.0453547
						582.049	0.00137489	0.0743376	0.045362
						583.049	0.00136757	0.0743302	0.0453694
						584.049	0.00136029	0.0743229	0.0453766
						585.049	0.00135305	0.0743157	0.0453839
						586.049	0.00134585	0.0743085	0.0453911
						587.049	0.00133869	0.0743013	0.0453982
						588.049	0.00133156	0.0742942	0.0454054
						589.049	0.00132448	0.0742871	0.0454125
						590.049	0.00131743	0.0742801	0.0454195
						591.049	0.00131042	0.0742731	0.0454265
						592.049	0.00130345	0.0742661	0.0454335
						593.049	0.00129652	0.0742592	0.0454404
						594.049	0.00128962	0.0742523	0.0454473
						595.049	0.00128276	0.0742454	0.0454542
						596.049	0.00127594	0.0742386	0.045461
						597.049	0.00126916	0.0742318	0.0454678
						598.049	0.00126241	0.0742251	0.0454745
						599.049	0.0012557	0.0742184	0.0454812
						600.049	0.00124903	0.0742117	0.0454879
						601.049	0.00124239	0.074205	0.0454945
						602.049	0.00123578	0.0741984	0.0455011
						603.049	0.00122922	0.0741919	0.0455077
						604.049	0.00122269	0.0741853	0.0455142
						605.049	0.00121619	0.0741788	0.0455207
						606.049	0.00120973	0.0741724	0.0455272
						607.049	0.0012033	0.074166	0.0455336
						608.049	0.00119691	0.0741596	0.04554
						609.049	0.00119055	0.0741532	0.0455464
						610.049	0.00118423	0.0741469	0.0455527
						611.049	0.00117794	0.0741406	0.045559
						612.049	0.00117169	0.0741343	0.0455652
						613.049	0.00116547	0.0741281	0.0455715
						614.049	0.00115928	0.0741219	0.0455776
						615.049	0.00115312	0.0741158	0.0455838
						616.049	0.001147	0.0741097	0.0455899
						617.049	0.00114091	0.0741036	0.045596
						618.049	0.00113486	0.0740975	0.0456021
						619.049	0.00112884	0.0740915	0.0456081
						620.049	0.00112285	0.0740855	0.0456141
						621.049	0.00111689	0.0740795	0.04562
						622.049	0.00111096	0.0740736	0.045626
						623.049	0.00110507	0.0740677	0.0456319
						624.049	0.00109921	0.0740619	0.0456377
						625.049	0.00109338	0.074056	0.0456435
						626.049	0.00108758	0.0740502	0.0456493
						627.049	0.00108181	0.0740445	0.0456551
						628.049	0.00107607	0.0740387	0.0456609
						629.049	0.00107037	0.074033	0.0456666
						630.049	0.00106469	0.0740274	0.0456722
						631.049	0.00105905	0.0740217	0.0456779
						632.049	0.00105343	0.0740161	0.0456835
						633.049	0.00104785	0.0740105	0.0456891
						634.049	0.00104229	0.0740049	0.0456946
						635.049	0.00103677	0.0739994	0.0457002
						636.049	0.00103127	0.0739939	0.0457057
						637.049	0.00102581	0.0739885	0.0457111
						638.049	0.00102037	0.073983	0.0457166
						639.049	0.00101497	0.0739776	0.045722
						640.049	0.00100959	0.0739722	0.0457273
						641.049	0.00100424	0.0739669	0.0457327
						642.049	0.00099892	0.0739616	0.045738
						643.049	0.00099363	0.0739563	0.0457433
						644.049	0.00098836	0.073951	0.0457486
						645.049	0.00098313	0.0739458	0.0457538
						646.049	0.00097792	0.0739406	0.045759
						647.049	0.00097274	0.0739354	0.0457642
						648.049	0.00096759	0.0739303	0.0457693
						649.049	0.00096247	0.0739251	0.0457745
						650.049	0.00095737	0.07392	0.0457796
						651.049	0.0009523	0.073915	0.0457846
						652.049	0.00094726	0.0739099	0.0457897
						653.049	0.00094225	0.0739049	0.0457947
						654.049	0.00093726	0.0738999	0.0457997
						655.049	0.0009323	0.073895	0.0458046
						656.049	0.00092737	0.07389	0.0458096
						657.049	0.00092246	0.0738851	0.0458145
						658.049	0.00091758	0.0738802	0.0458194
						659.049	0.00091272	0.0738754	0.0458242
						660.049	0.00090789	0.0738705	0.045829
						661.049	0.00090309	0.0738657	0.0458338
						662.049	0.00089831	0.073861	0.0458386
						663.049	0.00089356	0.0738562	0.0458434
						664.049	0.00088883	0.0738515	0.0458481
						665.049	0.00088413	0.0738468	0.0458528
						666.049	0.00087946	0.0738421	0.0458575
						667.049	0.0008748	0.0738375	0.0458621
						668.049	0.00087018	0.0738328	0.0458667
						669.049	0.00086558	0.0738282	0.0458713
						670.049	0.000861	0.0738237	0.0458759
						671.049	0.00085645	0.0738191	0.0458805
						672.049	0.00085192	0.0738146	0.045885
						673.049	0.00084741	0.0738101	0.0458895
						674.049	0.00084294	0.0738056	0.045894
						675.049	0.00083848	0.0738011	0.0458984
						676.049	0.00083405	0.0737967	0.0459029
						677.049	0.00082964	0.0737923	0.0459073
						678.049	0.00082525	0.0737879	0.0459117
						679.049	0.00082089	0.0737836	0.045916
						680.049	0.00081655	0.0737792	0.0459204
						681.049	0.00081224	0.0737749	0.0459247
						682.049	0.00080795	0.0737706	0.045929
						683.049	0.00080368	0.0737663	0.0459332
						684.049	0.00079943	0.0737621	0.0459375
						685.049	0.00079521	0.0737579	0.0459417
						686.049	0.00079101	0.0737537	0.0459459
						687.049	0.00078683	0.0737495	0.0459501
						688.049	0.00078267	0.0737453	0.0459543
						689.049	0.00077854	0.0737412	0.0459584
						690.049	0.00077443	0.0737371	0.0459625
						691.049	0.00077034	0.073733	0.0459666
						692.049	0.00076627	0.0737289	0.0459707
						693.049	0.00076222	0.0737249	0.0459747
						694.049	0.0007582	0.0737209	0.0459787
						695.049	0.0007542	0.0737169	0.0459827
						696.049	0.00075021	0.0737129	0.0459867
						697.049	0.00074625	0.0737089	0.0459907
						698.049	0.00074231	0.073705	0.0459946
						699.049	0.00073839	0.0737011	0.0459985
						700.049	0.0007345	0.0736972	0.0460024
						701.049	0.00073062	0.0736933	0.0460063
						702.049	0.00072676	0.0736894	0.0460102
						703.049	0.00072293	0.0736856	0.046014
						704.049	0.00071911	0.0736818	0.0460178
						705.049	0.00071532	0.073678	0.0460216
						706.049	0.00071154	0.0736742	0.0460254
						707.049	0.00070779	0.0736704	0.0460291
						708.049	0.00070405	0.0736667	0.0460329
						709.049	0.00070034	0.073663	0.0460366
						710.049	0.00069664	0.0736593	0.0460403
						711.049	0.00069297	0.0736556	0.046044
						712.049	0.00068931	0.073652	0.0460476
						713.049	0.00068568	0.0736483	0.0460513
						714.049	0.00068206	0.0736447	0.0460549
						715.049	0.00067846	0.0736411	0.0460585
						716.049	0.00067488	0.0736375	0.046062
						717.049	0.00067132	0.073634	0.0460656
						718.049	0.00066778	0.0736304	0.0460691
						719.049	0.00066426	0.0736269	0.0460727
						720.049	0.00066076	0.0736234	0.0460762
						721.049	0.00065728	0.0736199	0.0460796
						722.049	0.00065381	0.0736165	0.0460831
						723.049	0.00065036	0.073613	0.0460866
						724.049	0.00064693	0.0736096	0.04609
						725.049	0.00064352	0.0736062	0.0460934
						726.049	0.00064013	0.0736028	0.0460968
						727.049	0.00063676	0.0735994	0.0461002
						728.049	0.0006334	0.073596	0.0461035
						729.049	0.00063006	0.0735927	0.0461069
						730.049	0.00062674	0.0735894	0.0461102
						731.049	0.00062344	0.0735861	0.0461135
						732.049	0.00062015	0.0735828	0.0461168
						733.049	0.00061688	0.0735795	0.04612
						734.049	0.00061363	0.0735763	0.0461233
						735.049	0.0006104	0.0735731	0.0461265
						736.049	0.00060718	0.0735698	0.0461297
						737.049	0.00060398	0.0735666	0.0461329
						738.049	0.0006008	0.0735635	0.0461361
						739.049	0.00059763	0.0735603	0.0461393
						740.049	0.00059448	0.0735571	0.0461424
						741.049	0.00059135	0.073554	0.0461456
						742.049	0.00058824	0.0735509	0.0461487
						743.049	0.00058514	0.0735478	0.0461518
						744.049	0.00058206	0.0735447	0.0461549
						745.049	0.00057899	0.0735416	0.0461579
						746.049	0.00057594	0.0735386	0.046161
						747.049	0.00057291	0.0735356	0.046164
						748.049	0.00056989	0.0735325	0.046167
						749.049	0.00056689	0.0735295	0.04617
						750.049	0.0005639	0.0735266	0.046173
						751.049	0.00056093	0.0735236	0.046176
						752.049	0.00055798	0.0735206	0.0461789
						753.049	0.00055504	0.0735177	0.0461819
						754.049	0.00055212	0.0735148	0.0461848
						755.049	0.00054921	0.0735119	0.0461877
						756.049	0.00054632	0.073509	0.0461906
						757.049	0.00054344	0.0735061	0.0461935
						758.049	0.00054058	0.0735032	0.0461963
						759.049	0.00053774	0.0735004	0.0461992
						760.049	0.0005349	0.0734976	0.046202
						761.049	0.00053209	0.0734947	0.0462048
						762.049	0.00052929	0.0734919	0.0462076
						763.049	0.0005265	0.0734892	0.0462104
						764.049	0.00052373	0.0734864	0.0462132
						765.049	0.00052097	0.0734836	0.0462159
						766.049	0.00051823	0.0734809	0.0462187
						767.049	0.0005155	0.0734782	0.0462214
						768.049	0.00051279	0.0734754	0.0462241
						769.049	0.00051009	0.0734728	0.0462268
						770.049	0.00050741	0.0734701	0.0462295
						771.049	0.00050474	0.0734674	0.0462322
						772.049	0.00050208	0.0734647	0.0462348
						773.049	0.00049944	0.0734621	0.0462375
						774.049	0.00049681	0.0734595	0.0462401
						775.049	0.0004942	0.0734569	0.0462427
						776.049	0.0004916	0.0734542	0.0462453
						777.049	0.00048901	0.0734517	0.0462479
						778.049	0.00048644	0.0734491	0.0462505
						779.049	0.00048388	0.0734465	0.046253
						780.049	0.00048134	0.073444	0.0462556
						781.049	0.0004788	0.0734415	0.0462581
						782.049	0.00047628	0.0734389	0.0462606
						783.049	0.00047378	0.0734364	0.0462631
						784.049	0.00047129	0.0734339	0.0462656
						785.049	0.00046881	0.0734315	0.0462681
						786.049	0.00046634	0.073429	0.0462706
						787.049	0.00046389	0.0734265	0.046273
						788.049	0.00046145	0.0734241	0.0462755
						789.049	0.00045902	0.0734217	0.0462779
						790.049	0.00045661	0.0734193	0.0462803
						791.049	0.00045421	0.0734169	0.0462827
						792.049	0.00045182	0.0734145	0.0462851
						793.049	0.00044945	0.0734121	0.0462875
						794.049	0.00044708	0.0734097	0.0462898
						795.049	0.00044473	0.0734074	0.0462922
						796.049	0.00044239	0.073405	0.0462945
						797.049	0.00044007	0.0734027	0.0462969
						798.049	0.00043775	0.0734004	0.0462992
						799.049	0.00043545	0.0733981	0.0463015
						800.049	0.00043316	0.0733958	0.0463038
						801.049	0.00043089	0.0733935	0.046306
						802.049	0.00042862	0.0733913	0.0463083
						803.049	0.00042637	0.073389	0.0463106
						804.049	0.00042413	0.0733868	0.0463128
						805.049	0.0004219	0.0733846	0.046315
						806.049	0.00041968	0.0733823	0.0463172
						807.049	0.00041747	0.0733801	0.0463194
						808.049	0.00041528	0.0733779	0.0463216
						809.049	0.0004131	0.0733758	0.0463238
						810.049	0.00041093	0.0733736	0.046326
						811.049	0.00040877	0.0733714	0.0463282
						812.049	0.00040662	0.0733693	0.0463303
						813.049	0.00040448	0.0733671	0.0463324
						814.049	0.00040236	0.073365	0.0463346
						815.049	0.00040024	0.0733629	0.0463367
						816.049	0.00039814	0.0733608	0.0463388
						817.049	0.00039605	0.0733587	0.0463409
						818.049	0.00039397	0.0733566	0.046343
						819.049	0.0003919	0.0733546	0.046345
						820.049	0.00038984	0.0733525	0.0463471
						821.049	0.00038779	0.0733504	0.0463491
						822.049	0.00038575	0.0733484	0.0463512
						823.049	0.00038372	0.0733464	0.0463532
						824.049	0.00038171	0.0733444	0.0463552
						825.049	0.0003797	0.0733424	0.0463572
						826.049	0.00037771	0.0733404	0.0463592
						827.049	0.00037572	0.0733384	0.0463612
						828.049	0.00037375	0.0733364	0.0463632
						829.049	0.00037179	0.0733344	0.0463651
						830.049	0.00036984	0.0733325	0.0463671
						831.049	0.00036789	0.0733305	0.046369
						832.049	0.00036596	0.0733286	0.046371
						833.049	0.00036404	0.0733267	0.0463729
						834.049	0.00036213	0.0733248	0.0463748
						835.049	0.00036022	0.0733229	0.0463767
						836.049	0.00035833	0.073321	0.0463786
						837.049	0.00035645	0.0733191	0.0463805
						838.049	0.00035458	0.0733172	0.0463823
						839.049	0.00035272	0.0733154	0.0463842
						840.049	0.00035086	0.0733135	0.0463861
						841.049	0.00034902	0.0733117	0.0463879
						842.049	0.00034719	0.0733098	0.0463897
						843.049	0.00034537	0.073308	0.0463916
						844.049	0.00034355	0.0733062	0.0463934
						845.049	0.00034175	0.0733044	0.0463952
						846.049	0.00033996	0.0733026	0.046397
						847.049	0.00033817	0.0733008	0.0463988
						848.049	0.00033639	0.0732991	0.0464005
						849.049	0.00033463	0.0732973	0.0464023
						850.049	0.00033287	0.0732955	0.0464041
						851.049	0.00033112	0.0732938	0.0464058
						852.049	0.00032939	0.073292	0.0464075
						853.049	0.00032766	0.0732903	0.0464093
						854.049	0.00032594	0.0732886	0.046411
						855.049	0.00032423	0.0732869	0.0464127
						856.049	0.00032252	0.0732852	0.0464144
						857.049	0.00032083	0.0732835	0.0464161
						858.049	0.00031915	0.0732818	0.0464178
						859.049	0.00031747	0.0732801	0.0464195
						860.049	0.00031581	0.0732785	0.0464211
						861.049	0.00031415	0.0732768	0.0464228
						862.049	0.0003125	0.0732751	0.0464244
						863.049	0.00031086	0.0732735	0.0464261
						864.049	0.00030923	0.0732719	0.0464277
						865.049	0.00030761	0.0732703	0.0464293
						866.049	0.00030599	0.0732687	0.0464309
						867.049	0.00030439	0.073267	0.0464325
						868.049	0.00030279	0.0732654	0.0464341
						869.049	0.0003012	0.0732639	0.0464357
						870.049	0.00029962	0.0732623	0.0464373
						871.049	0.00029805	0.0732607	0.0464389
						872.049	0.00029648	0.0732591	0.0464404
						873.049	0.00029493	0.0732576	0.046442
						874.049	0.00029338	0.073256	0.0464435
						875.049	0.00029184	0.0732545	0.0464451
						876.049	0.00029031	0.073253	0.0464466
						877.049	0.00028879	0.0732514	0.0464481
						878.049	0.00028727	0.0732499	0.0464497
						879.049	0.00028576	0.0732484	0.0464512
						880.049	0.00028426	0.0732469	0.0464527
						881.049	0.00028277	0.0732454	0.0464541
						882.049	0.00028129	0.0732439	0.0464556
						883.049	0.00027981	0.0732425	0.0464571
						884.049	0.00027835	0.073241	0.0464586
						885.049	0.00027689	0.0732395	0.04646
						886.049	0.00027543	0.0732381	0.0464615
						887.049	0.00027399	0.0732366	0.0464629
						888.049	0.00027255	0.0732352	0.0464644
						889.049	0.00027112	0.0732338	0.0464658
						890.049	0.0002697	0.0732324	0.0464672
						891.049	0.00026828	0.0732309	0.0464686
						892.049	0.00026688	0.0732295	0.04647
						893.049	0.00026548	0.0732281	0.0464714
						894.049	0.00026408	0.0732267	0.0464728
						895.049	0.0002627	0.0732253	0.0464742
						896.049	0.00026132	0.073224	0.0464756
						897.049	0.00025995	0.0732226	0.046477
						898.049	0.00025859	0.0732212	0.0464783
						899.049	0.00025723	0.0732199	0.0464797
						900.049	0.00025588	0.0732185	0.046481
						901.049	0.00025454	0.0732172	0.0464824
						902.049	0.00025321	0.0732159	0.0464837
						903.049	0.00025188	0.0732145	0.046485
						904.049	0.00025056	0.0732132	0.0464864
						905.049	0.00024924	0.0732119	0.0464877
						906.049	0.00024794	0.0732106	0.046489
						907.049	0.00024664	0.0732093	0.0464903
						908.049	0.00024534	0.073208	0.0464916
						909.049	0.00024406	0.0732067	0.0464929
						910.049	0.00024278	0.0732054	0.0464941
						911.049	0.0002415	0.0732042	0.0464954
						912.049	0.00024024	0.0732029	0.0464967
						913.049	0.00023898	0.0732016	0.046498
						914.049	0.00023773	0.0732004	0.0464992
						915.049	0.00023648	0.0731991	0.0465004
						916.049	0.00023524	0.0731979	0.0465017
						917.049	0.00023401	0.0731967	0.0465029
						918.049	0.00023278	0.0731954	0.0465041
						919.049	0.00023156	0.0731942	0.0465054
						920.049	0.00023034	0.073193	0.0465066
						921.049	0.00022914	0.0731918	0.0465078
						922.049	0.00022794	0.0731906	0.046509
						923.049	0.00022674	0.0731894	0.0465102
						924.049	0.00022555	0.0731882	0.0465114
						925.049	0.00022437	0.073187	0.0465125
						926.049	0.00022319	0.0731858	0.0465137
						927.049	0.00022202	0.0731847	0.0465149
						928.049	0.00022086	0.0731835	0.0465161
						929.049	0.0002197	0.0731824	0.0465172
						930.049	0.00021855	0.0731812	0.0465184
						931.049	0.0002174	0.0731801	0.0465195
						932.049	0.00021627	0.0731789	0.0465207
						933.049	0.00021513	0.0731778	0.0465218
						934.049	0.000214	0.0731767	0.0465229
						935.049	0.00021288	0.0731755	0.046524
						936.049	0.00021177	0.0731744	0.0465252
						937.049	0.00021066	0.0731733	0.0465263
						938.049	0.00020955	0.0731722	0.0465274
						939.049	0.00020845	0.0731711	0.0465285
						940.049	0.00020736	0.07317	0.0465296
						941.049	0.00020628	0.0731689	0.0465306
						942.049	0.00020519	0.0731679	0.0465317
						943.049	0.00020412	0.0731668	0.0465328
						944.049	0.00020305	0.0731657	0.0465339
						945.049	0.00020199	0.0731646	0.0465349
						946.049	0.00020093	0.0731636	0.046536
						947.049	0.00019987	0.0731625	0.0465371
						948.049	0.00019883	0.0731615	0.0465381
						949.049	0.00019778	0.0731604	0.0465391
						950.049	0.00019675	0.0731594	0.0465402
						951.049	0.00019572	0.0731584	0.0465412
						952.049	0.00019469	0.0731573	0.0465422
						953.049	0.00019367	0.0731563	0.0465433
						954.049	0.00019266	0.0731553	0.0465443
						955.049	0.00019165	0.0731543	0.0465453
						956.049	0.00019064	0.0731533	0.0465463
						957.049	0.00018964	0.0731523	0.0465473
						958.049	0.00018865	0.0731513	0.0465483
						959.049	0.00018766	0.0731503	0.0465493
						960.049	0.00018668	0.0731493	0.0465502
						961.049	0.0001857	0.0731484	0.0465512
						962.049	0.00018473	0.0731474	0.0465522
						963.049	0.00018376	0.0731464	0.0465532
						964.049	0.0001828	0.0731455	0.0465541
						965.049	0.00018184	0.0731445	0.0465551
						966.049	0.00018089	0.0731435	0.046556
						967.049	0.00017994	0.0731426	0.046557
						968.049	0.000179	0.0731417	0.0465579
						969.049	0.00017806	0.0731407	0.0465589
						970.049	0.00017713	0.0731398	0.0465598
						971.049	0.0001762	0.0731389	0.0465607
						972.049	0.00017527	0.0731379	0.0465617
						973.049	0.00017436	0.073137	0.0465626
						974.049	0.00017344	0.0731361	0.0465635
						975.049	0.00017253	0.0731352	0.0465644
						976.049	0.00017163	0.0731343	0.0465653
						977.049	0.00017073	0.0731334	0.0465662
						978.049	0.00016984	0.0731325	0.0465671
						979.049	0.00016895	0.0731316	0.046568
						980.049	0.00016806	0.0731307	0.0465689
						981.049	0.00016718	0.0731298	0.0465697
						982.049	0.00016631	0.073129	0.0465706
						983.049	0.00016544	0.0731281	0.0465715
						984.049	0.00016457	0.0731272	0.0465723
						985.049	0.00016371	0.0731264	0.0465732
						986.049	0.00016285	0.0731255	0.0465741
						987.049	0.000162	0.0731246	0.0465749
						988.049	0.00016115	0.0731238	0.0465758
						989.049	0.0001603	0.073123	0.0465766
						990.049	0.00015946	0.0731221	0.0465775
						991.049	0.00015863	0.0731213	0.0465783
						992.049	0.0001578	0.0731205	0.0465791
						993.049	0.00015697	0.0731196	0.04658
						994.049	0.00015615	0.0731188	0.0465808
						995.049	0.00015533	0.073118	0.0465816
						996.049	0.00015452	0.0731172	0.0465824
						997.049	0.00015371	0.0731164	0.0465832
						998.049	0.0001529	0.0731156	0.046584
						999.049	0.0001521	0.0731148	0.0465848
						1000.05	0.00015131	0.073114	0.0465856
						1001.05	0.00015052	0.0731132	0.0465864
						1002.05	0.00014973	0.0731124	0.0465872
						1003.05	0.00014894	0.0731116	0.046588
						1004.05	0.00014816	0.0731108	0.0465888
						1005.05	0.00014739	0.07311	0.0465895
						1006.05	0.00014662	0.0731093	0.0465903
						1007.05	0.00014585	0.0731085	0.0465911
						1008.05	0.00014508	0.0731077	0.0465918
						1009.05	0.00014432	0.073107	0.0465926
						1010.05	0.00014357	0.0731062	0.0465933
						1011.05	0.00014282	0.0731055	0.0465941
						1012.05	0.00014207	0.0731047	0.0465949
						1013.05	0.00014132	0.073104	0.0465956
						1014.05	0.00014058	0.0731032	0.0465963
						1015.05	0.00013985	0.0731025	0.0465971
						1016.05	0.00013912	0.0731018	0.0465978
						1017.05	0.00013839	0.073101	0.0465985
						1018.05	0.00013766	0.0731003	0.0465993
						1019.05	0.00013694	0.0730996	0.0466
						1020.05	0.00013623	0.0730989	0.0466007
						1021.05	0.00013551	0.0730982	0.0466014
						1022.05	0.0001348	0.0730975	0.0466021
						1023.05	0.0001341	0.0730968	0.0466028
						1024.05	0.0001334	0.073096	0.0466035
						1025.05	0.0001327	0.0730954	0.0466042
						1026.05	0.000132	0.0730947	0.0466049
						1027.05	0.00013131	0.073094	0.0466056
						1028.05	0.00013062	0.0730933	0.0466063
						1029.05	0.00012994	0.0730926	0.046607
						1030.05	0.00012926	0.0730919	0.0466077
						1031.05	0.00012858	0.0730912	0.0466083
						1032.05	0.00012791	0.0730906	0.046609
						1033.05	0.00012724	0.0730899	0.0466097
						1034.05	0.00012657	0.0730892	0.0466104
						1035.05	0.00012591	0.0730886	0.046611
						1036.05	0.00012525	0.0730879	0.0466117
						1037.05	0.0001246	0.0730873	0.0466123
						1038.05	0.00012394	0.0730866	0.046613
						1039.05	0.0001233	0.0730859	0.0466136
						1040.05	0.00012265	0.0730853	0.0466143
						1041.05	0.00012201	0.0730847	0.0466149
						1042.05	0.00012137	0.073084	0.0466155
						1043.05	0.00012073	0.0730834	0.0466162
						1044.05	0.0001201	0.0730828	0.0466168
						1045.05	0.00011947	0.0730821	0.0466174
						1046.05	0.00011885	0.0730815	0.0466181
						1047.05	0.00011823	0.0730809	0.0466187
						1048.05	0.00011761	0.0730803	0.0466193
						1049.05	0.00011699	0.0730796	0.0466199
						1050.05	0.00011638	0.073079	0.0466205
						1051.05	0.00011577	0.0730784	0.0466212
						1052.05	0.00011516	0.0730778	0.0466218
						1053.05	0.00011456	0.0730772	0.0466224
						1054.05	0.00011396	0.0730766	0.046623
						1055.05	0.00011336	0.073076	0.0466236
						1056.05	0.00011277	0.0730754	0.0466242
						1057.05	0.00011218	0.0730748	0.0466247
						1058.05	0.00011159	0.0730742	0.0466253
						1059.05	0.00011101	0.0730737	0.0466259
						1060.05	0.00011043	0.0730731	0.0466265
						1061.05	0.00010985	0.0730725	0.0466271
						1062.05	0.00010928	0.0730719	0.0466276
						1063.05	0.0001087	0.0730714	0.0466282
						1064.05	0.00010813	0.0730708	0.0466288
						1065.05	0.00010757	0.0730702	0.0466293
						1066.05	0.00010701	0.0730697	0.0466299
						1067.05	0.00010645	0.0730691	0.0466305
						1068.05	0.00010589	0.0730685	0.046631
						1069.05	0.00010533	0.073068	0.0466316
						1070.05	0.00010478	0.0730674	0.0466321
						1071.05	0.00010424	0.0730669	0.0466327
						1072.05	0.00010369	0.0730663	0.0466332
						1073.05	0.00010315	0.0730658	0.0466338
						1074.05	0.00010261	0.0730653	0.0466343
						1075.05	0.00010207	0.0730647	0.0466348
						1076.05	0.00010154	0.0730642	0.0466354
						1077.05	0.000101	0.0730637	0.0466359
						1078.05	0.00010048	0.0730631	0.0466365
						1079.05	9.995e-05	0.0730626	0.046637
						1080.05	9.943e-05	0.0730621	0.0466375
						1081.05	9.891e-05	0.0730616	0.046638
						1082.05	9.839e-05	0.073061	0.0466385
						1083.05	9.787e-05	0.0730605	0.0466391
						1084.05	9.736e-05	0.07306	0.0466396
						1085.05	9.685e-05	0.0730595	0.0466401
						1086.05	9.635e-05	0.073059	0.0466406
						1087.05	9.584e-05	0.0730585	0.0466411
						1088.05	9.534e-05	0.073058	0.0466416
						1089.05	9.484e-05	0.0730575	0.0466421
						1090.05	9.434e-05	0.073057	0.0466426
						1091.05	9.385e-05	0.0730565	0.0466431
						1092.05	9.336e-05	0.073056	0.0466436
						1093.05	9.287e-05	0.0730555	0.046644
						1094.05	9.239e-05	0.073055	0.0466445
						1095.05	9.19e-05	0.0730546	0.046645
						1096.05	9.142e-05	0.0730541	0.0466455
						1097.05	9.094e-05	0.0730536	0.046646
						1098.05	9.047e-05	0.0730531	0.0466465
						1099.05	8.999e-05	0.0730526	0.0466469
						1100.05	8.952e-05	0.0730522	0.0466474
						1101.05	8.905e-05	0.0730517	0.0466479
						1102.05	8.859e-05	0.0730512	0.0466483
						1103.05	8.812e-05	0.0730508	0.0466488
						1104.05	8.766e-05	0.0730503	0.0466493
						1105.05	8.721e-05	0.0730499	0.0466497
						1106.05	8.675e-05	0.0730494	0.0466502
						1107.05	8.629e-05	0.073049	0.0466506
						1108.05	8.584e-05	0.0730485	0.0466511
						1109.05	8.539e-05	0.0730481	0.0466515
						1110.05	8.495e-05	0.0730476	0.046652
						1111.05	8.45e-05	0.0730472	0.0466524
						1112.05	8.406e-05	0.0730467	0.0466529
						1113.05	8.362e-05	0.0730463	0.0466533
						1114.05	8.318e-05	0.0730458	0.0466537
						1115.05	8.275e-05	0.0730454	0.0466542
						1116.05	8.232e-05	0.073045	0.0466546
						1117.05	8.188e-05	0.0730445	0.046655
						1118.05	8.146e-05	0.0730441	0.0466555
						1119.05	8.103e-05	0.0730437	0.0466559
						1120.05	8.061e-05	0.0730433	0.0466563
						1121.05	8.018e-05	0.0730428	0.0466567
						1122.05	7.977e-05	0.0730424	0.0466572
						1123.05	7.935e-05	0.073042	0.0466576
						1124.05	7.893e-05	0.0730416	0.046658
						1125.05	7.852e-05	0.0730412	0.0466584
						1126.05	7.811e-05	0.0730408	0.0466588
						1127.05	7.77e-05	0.0730404	0.0466592
						1128.05	7.729e-05	0.07304	0.0466596
						1129.05	7.689e-05	0.0730395	0.04666
						1130.05	7.649e-05	0.0730391	0.0466604
						1131.05	7.609e-05	0.0730387	0.0466608
						1132.05	7.569e-05	0.0730383	0.0466612
						1133.05	7.529e-05	0.073038	0.0466616
						1134.05	7.49e-05	0.0730376	0.046662
						1135.05	7.451e-05	0.0730372	0.0466624
						1136.05	7.412e-05	0.0730368	0.0466628
						1137.05	7.373e-05	0.0730364	0.0466632
						1138.05	7.334e-05	0.073036	0.0466636
						1139.05	7.296e-05	0.0730356	0.046664
						1140.05	7.258e-05	0.0730352	0.0466643
						1141.05	7.22e-05	0.0730348	0.0466647
						1142.05	7.182e-05	0.0730345	0.0466651
						1143.05	7.145e-05	0.0730341	0.0466655
						1144.05	7.107e-05	0.0730337	0.0466659
						1145.05	7.07e-05	0.0730334	0.0466662
						1146.05	7.033e-05	0.073033	0.0466666
						1147.05	6.996e-05	0.0730326	0.046667
						1148.05	6.96e-05	0.0730323	0.0466673
						1149.05	6.923e-05	0.0730319	0.0466677
						1150.05	6.887e-05	0.0730315	0.0466681
						1151.05	6.851e-05	0.0730312	0.0466684
						1152.05	6.815e-05	0.0730308	0.0466688
						1153.05	6.78e-05	0.0730304	0.0466691
						1154.05	6.744e-05	0.0730301	0.0466695
						1155.05	6.709e-05	0.0730297	0.0466698
						1156.05	6.674e-05	0.0730294	0.0466702
						1157.05	6.639e-05	0.073029	0.0466705
						1158.05	6.604e-05	0.0730287	0.0466709
						1159.05	6.569e-05	0.0730284	0.0466712
						1160.05	6.535e-05	0.073028	0.0466716
						1161.05	6.501e-05	0.0730277	0.0466719
						1162.05	6.467e-05	0.0730273	0.0466722
						1163.05	6.433e-05	0.073027	0.0466726
						1164.05	6.399e-05	0.0730266	0.0466729
						1165.05	6.366e-05	0.0730263	0.0466733
						1166.05	6.333e-05	0.073026	0.0466736
						1167.05	6.3e-05	0.0730256	0.0466739
						1168.05	6.267e-05	0.0730253	0.0466743
						1169.05	6.234e-05	0.073025	0.0466746
						1170.05	6.201e-05	0.0730247	0.0466749
						1171.05	6.169e-05	0.0730243	0.0466752
						1172.05	6.137e-05	0.073024	0.0466756
						1173.05	6.104e-05	0.0730237	0.0466759
						1174.05	6.073e-05	0.0730234	0.0466762
						1175.05	6.041e-05	0.0730231	0.0466765
						1176.05	6.009e-05	0.0730227	0.0466768
						1177.05	5.978e-05	0.0730224	0.0466772
						1178.05	5.946e-05	0.0730221	0.0466775
						1179.05	5.915e-05	0.0730218	0.0466778
						1180.05	5.884e-05	0.0730215	0.0466781
						1181.05	5.854e-05	0.0730212	0.0466784
						1182.05	5.823e-05	0.0730209	0.0466787
						1183.05	5.793e-05	0.0730206	0.046679
						1184.05	5.762e-05	0.0730203	0.0466793
						1185.05	5.732e-05	0.07302	0.0466796
						1186.05	5.702e-05	0.0730197	0.0466799
						1187.05	5.672e-05	0.0730194	0.0466802
						1188.05	5.643e-05	0.0730191	0.0466805
						1189.05	5.613e-05	0.0730188	0.0466808
						1190.05	5.584e-05	0.0730185	0.0466811
						1191.05	5.555e-05	0.0730182	0.0466814
						1192.05	5.526e-05	0.0730179	0.0466817
						1193.05	5.497e-05	0.0730176	0.046682
						1194.05	5.468e-05	0.0730173	0.0466822
						1195.05	5.439e-05	0.0730171	0.0466825
						1196.05	5.411e-05	0.0730168	0.0466828
						1197.05	5.383e-05	0.0730165	0.0466831
						1198.05	5.354e-05	0.0730162	0.0466834
						1199.05	5.326e-05	0.0730159	0.0466837
						1200	5.3e-05	0.0730157	0.0466839

## Sheet: BuDABCOI_BuI_DMSO_30C
Measured and fit concentrations (molar) vs. time (seconds) for the reaction BuDABCOI + BuI ® Bu2-DABCO-I2 in DMSO-d6 at 30 C. The side reaction BuI + DMSO ® DMSO·BuI is also considered.
The fit of the data was performed using a kinetic model of the reaction with the Berkeley-Madonna program.
TIME_Bu2DABCOI2	Bu2DABCOI2_MEAS	TIME_BuDABCOI	BuDABCOI_MEAS	TIME_DABCO	DABCO	TIME_BuDMSOI	BuDMSOI_MEAS	TIME_FIT	BuDABCOI_FIT	Bu2DABCOI2_FIT	BuDMSOI_FIT
0	0	0	0	0	0.0476	0	0	0	0	0	0		METHOD STIFF
120	0.000188	642	0.0521	120	0.0118	120	0	1e-06	0	0	0
400	0.000563	1118	0.0514	400	0.000188	400	0	3e-06	1e-08	0	0		STARTTIME = 0
642	0.000938	1474	0.051			642	0	7e-06	2e-08	0	0		STOPTIME = 70000
1118	0.00131	1830	0.051			1118	0.001125	1.5e-05	4e-08	0	0		DT = 0.02
1474	0.00169	2186	0.0503			1474	0.001125	3.1e-05	8e-08	0	0
1830	0.00206	2542	0.0499			1830	0.001125	6.3e-05	1.6e-07	0	0		{RXN1: DABCO + 2.5BuI --> BuDABCOI + 1.5BuI}
2186	0.00244	2898	0.0495			2186	0.001125	0.000127	3.2e-07	0	0		{RXN2: BuDABCOI + BuI --> Bu2DABCOI2}
2542	0.00281	3254	0.0491			2542	0.001125	0.000255	6.5e-07	0	0		{RXN3: DMSO + 0.5BuI --> 0.5BuDMSOI}
2898	0.00319	3610	0.0488			2898	0.00225	0.000511	1.3e-06	0	0
3254	0.00356	3966	0.0484			3254	0.00225	0.001023	2.61e-06	0	0		RXN1 = K1f*DABCO*BuI - K1r*BuDABCOI
3610	0.00394	4322	0.048			3610	0.00225	0.002047	5.22e-06	0	0		RXN2 = K2f*BuDABCOI*BuI - K2r*Bu2DABCOI2
3966	0.00431	4678	0.048			3966	0.00225	0.004095	1.043e-05	0	0		RXN3 = K3f*DMSO*BuI - K3r*BuDMSOI
4322	0.00469	5034	0.0476			4322	0.00225	0.008191	2.086e-05	0	1e-08
4678	0.00506	5390	0.0473			4678	0.003375	0.016383	4.172e-05	0	2e-08		K1f = 0.34007
5034	0.00544	5746	0.0469			5034	0.003375	0.032767	8.34e-05	0	4e-08		K1r = 0
5390	0.00581	6402	0.0461			5390	0.003375	0.065535	0.00016662	0	7e-08		K2f = 0.00024151
5746	0.00619	7058	0.0458			5746	0.003375	0.131071	0.00033251	0	1.4e-07		K2r = 0
6402	0.00675	7714	0.045			6402	0.0045	0.262143	0.00066217	0	2.9e-07		K3f = 0.0000077307
7058	0.00731	8370	0.0443			7058	0.0045	0.524287	0.00131304	1e-08	5.7e-07		K3r = 0.000015082
7714	0.00806	9026	0.0439			7714	0.0045	1.04858	0.00258192	5e-08	1.14e-06
8370	0.00863	9682	0.0431			8370	0.005625	2.04858	0.00488697	1.7e-07	2.2e-06		d/dt(DABCO) = -RXN1
9026	0.00919	10338	0.0428			9026	0.005625	3.04858	0.00705165	3.7e-07	3.25e-06		d/dt(BuI) = -RXN1-RXN2
9682	0.00975	10994	0.0424			9682	0.005625	4.04857	0.00908751	6.3e-07	4.28e-06		d/dt(BuDABCOI) = RXN1-RXN2
10338	0.0103	12306	0.0416			10338	0.005625	5.04857	0.0110049	9.4e-07	5.29e-06		d/dt(Bu2DABCOI2) = RXN2
10994	0.0109	12962	0.0413			10994	0.00675	6.04857	0.012813	1.32e-06	6.29e-06		d/dt(BuDMSOI) = RXN3
12306	0.0114	13618	0.0405			12306	0.00675	7.04857	0.0145202	1.74e-06	7.28e-06		d/dt(DMSO) = -RXN3
12962	0.012	14274	0.0405			12962	0.007875	8.04857	0.0161339	2.21e-06	8.25e-06
13618	0.0124	14930	0.0394			13618	0.007875	9.04857	0.0176611	2.71e-06	9.21e-06		INIT BuI = 0.14137
14274	0.0131	16786	0.039			14274	0.007875	10.0486	0.0191077	3.26e-06	1.017e-05		INIT DABCO = 0.053
14930	0.0135	18642	0.0379			14930	0.007875	11.0486	0.0204795	3.84e-06	1.11e-05		INIT BuDABCOI = 0
16786	0.0139	20498	0.0364			16786	0.009	12.0486	0.0217814	4.45e-06	1.203e-05		INIT Bu2DABCOI2 = 0
18642	0.0154	22354	0.0353			18642	0.009	13.0486	0.0230183	5.1e-06	1.295e-05		INIT BuDMSOI = 0
20498	0.0165	24210	0.0341			20498	0.010125	14.0486	0.0241941	5.77e-06	1.386e-05		INIT DMSO = 1
22354	0.0178	26066	0.0326			22354	0.01125	15.0486	0.025313	6.47e-06	1.476e-05
24210	0.0191	27922	0.0315			24210	0.012375	16.0486	0.0263785	7.19e-06	1.566e-05
26066	0.0201	29778	0.0304			26066	0.012375	17.0486	0.0273938	7.93e-06	1.654e-05		Name	Value
27922	0.021	31634	0.0293			27922	0.0135	18.0486	0.0283619	8.7e-06	1.742e-05		STARTTIME	0
29778	0.0221	33490	0.0289			29778	0.014625	19.0486	0.0292858	9.48e-06	1.829e-05		STOPTIME	70000
31634	0.0233	35346	0.0278			31634	0.014625	20.0486	0.0301678	1.028e-05	1.915e-05		DTMIN	1e-06
33490	0.024	37202	0.0266			33490	0.014625	21.0486	0.0310106	1.11e-05	2.001e-05		DTMAX	1
35346	0.0248	40458	0.0266			35346	0.01575	22.0486	0.0318162	1.193e-05	2.086e-05		DTOUT	0
37202	0.0255	43714	0.0251			37202	0.01575	23.0486	0.0325867	1.278e-05	2.17e-05		TOLERANCE	0.01
40458	0.0266	46970	0.0244			40458	0.016875	24.0486	0.033324	1.364e-05	2.254e-05		K1f *	0.34007
43714	0.0279	50226	0.0225			43714	0.016875	25.0486	0.03403	1.452e-05	2.337e-05		K1r	0
46970	0.0291	53482	0.021			46970	0.018	26.0486	0.0347062	1.541e-05	2.42e-05		K2f *	0.00024151
50226	0.0302	56738	0.021			50226	0.018	27.0486	0.0353543	1.631e-05	2.502e-05		K2r	0
53482	0.0311	59994	0.0199			53482	0.019125	28.0486	0.0359756	1.722e-05	2.583e-05		K3f *	7.7307e-06
56738	0.0323	63250	0.0184			56738	0.019125	29.0486	0.0365715	1.814e-05	2.665e-05		K3r *	1.5082e-05
59994	0.0332	66506	0.0176			59994	0.02025	30.0486	0.0371434	1.907e-05	2.745e-05		INIT DABCO	0.053
63250	0.0338	69762	0.0165			63250	0.02025	31.0486	0.0376923	2.001e-05	2.826e-05		INIT BuI *	0.14137
66506	0.0349					66506	0.02025	32.0486	0.0382194	2.095e-05	2.905e-05		INIT BuDABCOI	0
69762	0.0356					69762	0.02025	33.0486	0.0387257	2.191e-05	2.985e-05		INIT Bu2DABCOI2	0
								34.0486	0.0392123	2.287e-05	3.064e-05		INIT BuDMSOI	0
								35.0486	0.03968	2.384e-05	3.143e-05		INIT DMSO	1
								36.0486	0.0401297	2.482e-05	3.221e-05
								37.0486	0.0405623	2.58e-05	3.299e-05
								38.0486	0.0409785	2.679e-05	3.377e-05
								39.0486	0.0413791	2.779e-05	3.454e-05
								40.0486	0.0417647	2.879e-05	3.531e-05
								41.0486	0.042136	2.98e-05	3.608e-05
								42.0486	0.0424936	3.081e-05	3.684e-05
								43.0486	0.0428382	3.183e-05	3.76e-05
								44.0486	0.0431702	3.285e-05	3.836e-05
								45.0486	0.0434901	3.387e-05	3.912e-05
								46.0486	0.0437986	3.49e-05	3.988e-05
								47.0486	0.0440961	3.593e-05	4.063e-05
								48.0486	0.0443829	3.697e-05	4.138e-05
								49.0486	0.0446597	3.801e-05	4.212e-05
								50.0486	0.0449266	3.906e-05	4.287e-05
								51.0486	0.0451843	4.01e-05	4.361e-05
								52.0486	0.0454329	4.115e-05	4.435e-05
								53.0486	0.0456729	4.221e-05	4.509e-05
								54.0486	0.0459046	4.326e-05	4.583e-05
								55.0486	0.0461283	4.432e-05	4.657e-05
								56.0486	0.0463444	4.538e-05	4.73e-05
								57.0486	0.0465531	4.645e-05	4.803e-05
								58.0486	0.0467547	4.751e-05	4.876e-05
								59.0486	0.0469494	4.858e-05	4.949e-05
								60.0486	0.0471377	4.965e-05	5.022e-05
								61.0486	0.0473195	5.072e-05	5.095e-05
								62.0486	0.0474953	5.18e-05	5.167e-05
								63.0486	0.0476652	5.287e-05	5.239e-05
								64.0486	0.0478294	5.395e-05	5.312e-05
								65.0486	0.0479882	5.503e-05	5.384e-05
								66.0486	0.0481418	5.611e-05	5.456e-05
								67.0486	0.0482902	5.72e-05	5.528e-05
								68.0486	0.0484338	5.828e-05	5.599e-05
								69.0486	0.0485727	5.937e-05	5.671e-05
								70.0486	0.048707	6.046e-05	5.742e-05
								71.0486	0.0488369	6.155e-05	5.814e-05
								72.0486	0.0489627	6.264e-05	5.885e-05
								73.0486	0.0490843	6.373e-05	5.956e-05
								74.0486	0.0492019	6.482e-05	6.027e-05
								75.0486	0.0493158	6.592e-05	6.098e-05
								76.0486	0.049426	6.701e-05	6.169e-05
								77.0486	0.0495326	6.811e-05	6.24e-05
								78.0486	0.0496358	6.92e-05	6.311e-05
								79.0486	0.0497357	7.03e-05	6.382e-05
								80.0486	0.0498324	7.14e-05	6.452e-05
								81.0486	0.049926	7.25e-05	6.523e-05
								82.0486	0.0500166	7.36e-05	6.593e-05
								83.0486	0.0501043	7.471e-05	6.663e-05
								84.0486	0.0501892	7.581e-05	6.734e-05
								85.0486	0.0502715	7.691e-05	6.804e-05
								86.0486	0.0503511	7.802e-05	6.874e-05
								87.0486	0.0504282	7.912e-05	6.944e-05
								88.0486	0.0505028	8.023e-05	7.014e-05
								89.0486	0.0505751	8.133e-05	7.084e-05
								90.0486	0.0506451	8.244e-05	7.154e-05
								91.0486	0.0507128	8.355e-05	7.224e-05
								92.0486	0.0507785	8.466e-05	7.294e-05
								93.0486	0.0508421	8.577e-05	7.364e-05
								94.0486	0.0509036	8.688e-05	7.433e-05
								95.0486	0.0509633	8.799e-05	7.503e-05
								96.0486	0.051021	8.91e-05	7.573e-05
								97.0486	0.051077	9.021e-05	7.642e-05
								98.0486	0.0511311	9.132e-05	7.712e-05
								99.0486	0.0511836	9.243e-05	7.781e-05
								100.049	0.0512345	9.355e-05	7.851e-05
								101.049	0.0512837	9.466e-05	7.92e-05
								102.049	0.0513314	9.577e-05	7.989e-05
								103.049	0.0513776	9.689e-05	8.059e-05
								104.049	0.0514223	9.8e-05	8.128e-05
								105.049	0.0514657	9.912e-05	8.197e-05
								106.049	0.0515077	0.00010023	8.266e-05
								107.049	0.0515484	0.00010135	8.335e-05
								108.049	0.0515878	0.00010246	8.405e-05
								109.049	0.0516259	0.00010358	8.474e-05
								110.049	0.0516629	0.00010469	8.543e-05
								111.049	0.0516987	0.00010581	8.612e-05
								112.049	0.0517334	0.00010693	8.681e-05
								113.049	0.051767	0.00010805	8.75e-05
								114.049	0.0517996	0.00010916	8.819e-05
								115.049	0.0518311	0.00011028	8.888e-05
								116.049	0.0518617	0.0001114	8.957e-05
								117.049	0.0518912	0.00011252	9.025e-05
								118.049	0.0519199	0.00011364	9.094e-05
								119.049	0.0519477	0.00011476	9.163e-05
								120.049	0.0519746	0.00011587	9.232e-05
								121.049	0.0520006	0.00011699	9.301e-05
								122.049	0.0520258	0.00011811	9.369e-05
								123.049	0.0520502	0.00011923	9.438e-05
								124.049	0.0520739	0.00012035	9.507e-05
								125.049	0.0520968	0.00012147	9.575e-05
								126.049	0.052119	0.00012259	9.644e-05
								127.049	0.0521405	0.00012371	9.713e-05
								128.049	0.0521613	0.00012483	9.781e-05
								129.049	0.0521814	0.00012595	9.85e-05
								130.049	0.052201	0.00012707	9.919e-05
								131.049	0.0522198	0.0001282	9.987e-05
								132.049	0.0522381	0.00012932	0.00010056
								133.049	0.0522558	0.00013044	0.00010124
								134.049	0.052273	0.00013156	0.00010193
								135.049	0.0522896	0.00013268	0.00010261
								136.049	0.0523056	0.0001338	0.0001033
								137.049	0.0523212	0.00013492	0.00010398
								138.049	0.0523362	0.00013605	0.00010467
								139.049	0.0523508	0.00013717	0.00010535
								140.049	0.0523649	0.00013829	0.00010604
								141.049	0.0523786	0.00013941	0.00010672
								142.049	0.0523918	0.00014053	0.0001074
								143.049	0.0524045	0.00014166	0.00010809
								144.049	0.0524169	0.00014278	0.00010877
								145.049	0.0524288	0.0001439	0.00010946
								146.049	0.0524404	0.00014502	0.00011014
								147.049	0.0524516	0.00014615	0.00011082
								148.049	0.0524624	0.00014727	0.00011151
								149.049	0.0524729	0.00014839	0.00011219
								150.049	0.052483	0.00014951	0.00011287
								151.049	0.0524928	0.00015064	0.00011355
								152.049	0.0525022	0.00015176	0.00011424
								153.049	0.0525114	0.00015288	0.00011492
								154.049	0.0525202	0.00015401	0.0001156
								155.049	0.0525287	0.00015513	0.00011629
								156.049	0.052537	0.00015625	0.00011697
								157.049	0.052545	0.00015738	0.00011765
								158.049	0.0525527	0.0001585	0.00011833
								159.049	0.0525601	0.00015962	0.00011901
								160.049	0.0525673	0.00016074	0.0001197
								161.049	0.0525742	0.00016187	0.00012038
								162.049	0.0525809	0.00016299	0.00012106
								163.049	0.0525874	0.00016411	0.00012174
								164.049	0.0525936	0.00016524	0.00012242
								165.049	0.0525996	0.00016636	0.00012311
								166.049	0.0526055	0.00016748	0.00012379
								167.049	0.0526111	0.00016861	0.00012447
								168.049	0.0526165	0.00016973	0.00012515
								169.049	0.0526217	0.00017085	0.00012583
								170.049	0.0526267	0.00017198	0.00012651
								171.049	0.0526315	0.0001731	0.0001272
								172.049	0.0526362	0.00017423	0.00012788
								173.049	0.0526407	0.00017535	0.00012856
								174.049	0.052645	0.00017647	0.00012924
								175.049	0.0526492	0.0001776	0.00012992
								176.049	0.0526532	0.00017872	0.0001306
								177.049	0.052657	0.00017984	0.00013128
								178.049	0.0526607	0.00018097	0.00013196
								179.049	0.0526643	0.00018209	0.00013264
								180.049	0.0526677	0.00018321	0.00013332
								181.049	0.052671	0.00018434	0.00013401
								182.049	0.0526742	0.00018546	0.00013469
								183.049	0.0526772	0.00018658	0.00013537
								184.049	0.0526801	0.00018771	0.00013605
								185.049	0.0526829	0.00018883	0.00013673
								186.049	0.0526855	0.00018995	0.00013741
								187.049	0.0526881	0.00019108	0.00013809
								188.049	0.0526906	0.0001922	0.00013877
								189.049	0.0526929	0.00019333	0.00013945
								190.049	0.0526952	0.00019445	0.00014013
								191.049	0.0526973	0.00019557	0.00014081
								192.049	0.0526993	0.0001967	0.00014149
								193.049	0.0527013	0.00019782	0.00014217
								194.049	0.0527031	0.00019894	0.00014285
								195.049	0.0527049	0.00020007	0.00014353
								196.049	0.0527066	0.00020119	0.00014421
								197.049	0.0527082	0.00020231	0.00014489
								198.049	0.0527097	0.00020344	0.00014557
								199.049	0.0527112	0.00020456	0.00014625
								200.049	0.0527125	0.00020568	0.00014693
								201.049	0.0527138	0.00020681	0.00014761
								202.049	0.0527151	0.00020793	0.00014829
								203.049	0.0527162	0.00020905	0.00014897
								204.049	0.0527173	0.00021018	0.00014965
								205.049	0.0527183	0.0002113	0.00015033
								206.049	0.0527193	0.00021242	0.00015101
								207.049	0.0527202	0.00021355	0.00015169
								208.049	0.052721	0.00021467	0.00015237
								209.049	0.0527218	0.00021579	0.00015305
								210.049	0.0527225	0.00021692	0.00015373
								211.049	0.0527232	0.00021804	0.00015441
								212.049	0.0527238	0.00021916	0.00015509
								213.049	0.0527244	0.00022028	0.00015577
								214.049	0.0527249	0.00022141	0.00015644
								215.049	0.0527253	0.00022253	0.00015712
								216.049	0.0527257	0.00022365	0.0001578
								217.049	0.0527261	0.00022478	0.00015848
								218.049	0.0527264	0.0002259	0.00015916
								219.049	0.0527267	0.00022702	0.00015984
								220.049	0.052727	0.00022815	0.00016052
								221.049	0.0527272	0.00022927	0.0001612
								222.049	0.0527273	0.00023039	0.00016188
								223.049	0.0527275	0.00023151	0.00016256
								224.049	0.0527275	0.00023264	0.00016324
								225.049	0.0527276	0.00023376	0.00016392
								226.049	0.0527276	0.00023488	0.0001646
								227.049	0.0527276	0.00023601	0.00016527
								228.049	0.0527276	0.00023713	0.00016595
								229.049	0.0527275	0.00023825	0.00016663
								230.049	0.0527274	0.00023937	0.00016731
								231.049	0.0527272	0.0002405	0.00016799
								232.049	0.0527271	0.00024162	0.00016867
								233.049	0.0527269	0.00024274	0.00016935
								234.049	0.0527266	0.00024386	0.00017003
								235.049	0.0527264	0.00024499	0.00017071
								236.049	0.0527261	0.00024611	0.00017138
								237.049	0.0527258	0.00024723	0.00017206
								238.049	0.0527255	0.00024835	0.00017274
								239.049	0.0527251	0.00024948	0.00017342
								240.049	0.0527248	0.0002506	0.0001741
								241.049	0.0527244	0.00025172	0.00017478
								242.049	0.0527239	0.00025284	0.00017546
								243.049	0.0527235	0.00025396	0.00017613
								244.049	0.0527231	0.00025509	0.00017681
								245.049	0.0527226	0.00025621	0.00017749
								246.049	0.0527221	0.00025733	0.00017817
								247.049	0.0527216	0.00025845	0.00017885
								248.049	0.052721	0.00025958	0.00017953
								249.049	0.0527205	0.0002607	0.00018021
								250.049	0.0527199	0.00026182	0.00018088
								251.049	0.0527193	0.00026294	0.00018156
								252.049	0.0527187	0.00026406	0.00018224
								253.049	0.0527181	0.00026518	0.00018292
								254.049	0.0527175	0.00026631	0.0001836
								255.049	0.0527169	0.00026743	0.00018428
								256.049	0.0527162	0.00026855	0.00018495
								257.049	0.0527155	0.00026967	0.00018563
								258.049	0.0527148	0.00027079	0.00018631
								259.049	0.0527141	0.00027192	0.00018699
								260.049	0.0527134	0.00027304	0.00018767
								261.049	0.0527127	0.00027416	0.00018834
								262.049	0.052712	0.00027528	0.00018902
								263.049	0.0527112	0.0002764	0.0001897
								264.049	0.0527105	0.00027752	0.00019038
								265.049	0.0527097	0.00027865	0.00019106
								266.049	0.0527089	0.00027977	0.00019174
								267.049	0.0527081	0.00028089	0.00019241
								268.049	0.0527073	0.00028201	0.00019309
								269.049	0.0527065	0.00028313	0.00019377
								270.049	0.0527057	0.00028425	0.00019445
								271.049	0.0527049	0.00028537	0.00019513
								272.049	0.0527041	0.00028649	0.0001958
								273.049	0.0527032	0.00028762	0.00019648
								274.049	0.0527024	0.00028874	0.00019716
								275.049	0.0527015	0.00028986	0.00019784
								276.049	0.0527006	0.00029098	0.00019851
								277.049	0.0526998	0.0002921	0.00019919
								278.049	0.0526989	0.00029322	0.00019987
								279.049	0.052698	0.00029434	0.00020055
								280.049	0.0526971	0.00029546	0.00020123
								281.049	0.0526962	0.00029658	0.0002019
								282.049	0.0526953	0.0002977	0.00020258
								283.049	0.0526944	0.00029883	0.00020326
								284.049	0.0526935	0.00029995	0.00020394
								285.049	0.0526925	0.00030107	0.00020461
								286.049	0.0526916	0.00030219	0.00020529
								287.049	0.0526907	0.00030331	0.00020597
								288.049	0.0526897	0.00030443	0.00020665
								289.049	0.0526888	0.00030555	0.00020732
								290.049	0.0526878	0.00030667	0.000208
								291.049	0.0526869	0.00030779	0.00020868
								292.049	0.0526859	0.00030891	0.00020936
								293.049	0.0526849	0.00031003	0.00021003
								294.049	0.052684	0.00031115	0.00021071
								295.049	0.052683	0.00031227	0.00021139
								296.049	0.052682	0.00031339	0.00021207
								297.049	0.052681	0.00031451	0.00021274
								298.049	0.05268	0.00031563	0.00021342
								299.049	0.052679	0.00031675	0.0002141
								300.049	0.052678	0.00031787	0.00021478
								301.049	0.052677	0.00031899	0.00021545
								302.049	0.052676	0.00032011	0.00021613
								303.049	0.052675	0.00032123	0.00021681
								304.049	0.052674	0.00032235	0.00021749
								305.049	0.052673	0.00032347	0.00021816
								306.049	0.052672	0.00032459	0.00021884
								307.049	0.052671	0.00032571	0.00021952
								308.049	0.05267	0.00032683	0.00022019
								309.049	0.0526689	0.00032795	0.00022087
								310.049	0.0526679	0.00032907	0.00022155
								311.049	0.0526669	0.00033019	0.00022223
								312.049	0.0526658	0.00033131	0.0002229
								313.049	0.0526648	0.00033243	0.00022358
								314.049	0.0526638	0.00033355	0.00022426
								315.049	0.0526627	0.00033467	0.00022493
								316.049	0.0526617	0.00033579	0.00022561
								317.049	0.0526606	0.00033691	0.00022629
								318.049	0.0526596	0.00033803	0.00022696
								319.049	0.0526585	0.00033915	0.00022764
								320.049	0.0526575	0.00034027	0.00022832
								321.049	0.0526564	0.00034139	0.000229
								322.049	0.0526554	0.00034251	0.00022967
								323.049	0.0526543	0.00034363	0.00023035
								324.049	0.0526533	0.00034475	0.00023103
								325.049	0.0526522	0.00034587	0.0002317
								326.049	0.0526511	0.00034699	0.00023238
								327.049	0.0526501	0.00034811	0.00023306
								328.049	0.052649	0.00034923	0.00023373
								329.049	0.0526479	0.00035034	0.00023441
								330.049	0.0526469	0.00035146	0.00023509
								331.049	0.0526458	0.00035258	0.00023576
								332.049	0.0526447	0.0003537	0.00023644
								333.049	0.0526437	0.00035482	0.00023712
								334.049	0.0526426	0.00035594	0.00023779
								335.049	0.0526415	0.00035706	0.00023847
								336.049	0.0526404	0.00035818	0.00023915
								337.049	0.0526394	0.0003593	0.00023982
								338.049	0.0526383	0.00036041	0.0002405
								339.049	0.0526372	0.00036153	0.00024118
								340.049	0.0526361	0.00036265	0.00024185
								341.049	0.052635	0.00036377	0.00024253
								342.049	0.0526339	0.00036489	0.00024321
								343.049	0.0526329	0.00036601	0.00024388
								344.049	0.0526318	0.00036713	0.00024456
								345.049	0.0526307	0.00036825	0.00024523
								346.049	0.0526296	0.00036936	0.00024591
								347.049	0.0526285	0.00037048	0.00024659
								348.049	0.0526274	0.0003716	0.00024726
								349.049	0.0526263	0.00037272	0.00024794
								350.049	0.0526252	0.00037384	0.00024862
								351.049	0.0526242	0.00037496	0.00024929
								352.049	0.0526231	0.00037607	0.00024997
								353.049	0.052622	0.00037719	0.00025065
								354.049	0.0526209	0.00037831	0.00025132
								355.049	0.0526198	0.00037943	0.000252
								356.049	0.0526187	0.00038055	0.00025267
								357.049	0.0526176	0.00038166	0.00025335
								358.049	0.0526165	0.00038278	0.00025403
								359.049	0.0526154	0.0003839	0.0002547
								360.049	0.0526143	0.00038502	0.00025538
								361.049	0.0526132	0.00038614	0.00025606
								362.049	0.0526121	0.00038725	0.00025673
								363.049	0.052611	0.00038837	0.00025741
								364.049	0.0526099	0.00038949	0.00025808
								365.049	0.0526088	0.00039061	0.00025876
								366.049	0.0526077	0.00039173	0.00025944
								367.049	0.0526066	0.00039284	0.00026011
								368.049	0.0526055	0.00039396	0.00026079
								369.049	0.0526044	0.00039508	0.00026146
								370.049	0.0526033	0.0003962	0.00026214
								371.049	0.0526022	0.00039731	0.00026282
								372.049	0.0526011	0.00039843	0.00026349
								373.049	0.0526	0.00039955	0.00026417
								374.049	0.0525989	0.00040067	0.00026484
								375.049	0.0525978	0.00040178	0.00026552
								376.049	0.0525967	0.0004029	0.00026619
								377.049	0.0525956	0.00040402	0.00026687
								378.049	0.0525945	0.00040514	0.00026755
								379.049	0.0525934	0.00040625	0.00026822
								380.049	0.0525923	0.00040737	0.0002689
								381.049	0.0525912	0.00040849	0.00026957
								382.049	0.05259	0.0004096	0.00027025
								383.049	0.0525889	0.00041072	0.00027093
								384.049	0.0525878	0.00041184	0.0002716
								385.049	0.0525867	0.00041296	0.00027228
								386.049	0.0525856	0.00041407	0.00027295
								387.049	0.0525845	0.00041519	0.00027363
								388.049	0.0525834	0.00041631	0.0002743
								389.049	0.0525823	0.00041742	0.00027498
								390.049	0.0525812	0.00041854	0.00027565
								391.049	0.0525801	0.00041966	0.00027633
								392.049	0.052579	0.00042077	0.00027701
								393.049	0.0525779	0.00042189	0.00027768
								394.049	0.0525767	0.00042301	0.00027836
								395.049	0.0525756	0.00042412	0.00027903
								396.049	0.0525745	0.00042524	0.00027971
								397.049	0.0525734	0.00042636	0.00028038
								398.049	0.0525723	0.00042747	0.00028106
								399.049	0.0525712	0.00042859	0.00028173
								400.049	0.0525701	0.00042971	0.00028241
								401.049	0.052569	0.00043082	0.00028308
								402.049	0.0525679	0.00043194	0.00028376
								403.049	0.0525668	0.00043306	0.00028443
								404.049	0.0525656	0.00043417	0.00028511
								405.049	0.0525645	0.00043529	0.00028579
								406.049	0.0525634	0.0004364	0.00028646
								407.049	0.0525623	0.00043752	0.00028714
								408.049	0.0525612	0.00043864	0.00028781
								409.049	0.0525601	0.00043975	0.00028849
								410.049	0.052559	0.00044087	0.00028916
								411.049	0.0525579	0.00044198	0.00028984
								412.049	0.0525568	0.0004431	0.00029051
								413.049	0.0525556	0.00044422	0.00029119
								414.049	0.0525545	0.00044533	0.00029186
								415.049	0.0525534	0.00044645	0.00029254
								416.049	0.0525523	0.00044756	0.00029321
								417.049	0.0525512	0.00044868	0.00029389
								418.049	0.0525501	0.0004498	0.00029456
								419.049	0.052549	0.00045091	0.00029524
								420.049	0.0525479	0.00045203	0.00029591
								421.049	0.0525468	0.00045314	0.00029659
								422.049	0.0525456	0.00045426	0.00029726
								423.049	0.0525445	0.00045537	0.00029794
								424.049	0.0525434	0.00045649	0.00029861
								425.049	0.0525423	0.0004576	0.00029929
								426.049	0.0525412	0.00045872	0.00029996
								427.049	0.0525401	0.00045984	0.00030064
								428.049	0.052539	0.00046095	0.00030131
								429.049	0.0525378	0.00046207	0.00030199
								430.049	0.0525367	0.00046318	0.00030266
								431.049	0.0525356	0.0004643	0.00030334
								432.049	0.0525345	0.00046541	0.00030401
								433.049	0.0525334	0.00046653	0.00030469
								434.049	0.0525323	0.00046764	0.00030536
								435.049	0.0525312	0.00046876	0.00030603
								436.049	0.0525301	0.00046987	0.00030671
								437.049	0.0525289	0.00047099	0.00030738
								438.049	0.0525278	0.0004721	0.00030806
								439.049	0.0525267	0.00047322	0.00030873
								440.049	0.0525256	0.00047433	0.00030941
								441.049	0.0525245	0.00047545	0.00031008
								442.049	0.0525234	0.00047656	0.00031076
								443.049	0.0525223	0.00047768	0.00031143
								444.049	0.0525212	0.00047879	0.00031211
								445.049	0.05252	0.00047991	0.00031278
								446.049	0.0525189	0.00048102	0.00031345
								447.049	0.0525178	0.00048214	0.00031413
								448.049	0.0525167	0.00048325	0.0003148
								449.049	0.0525156	0.00048437	0.00031548
								450.049	0.0525145	0.00048548	0.00031615
								451.049	0.0525134	0.00048659	0.00031683
								452.049	0.0525123	0.00048771	0.0003175
								453.049	0.0525111	0.00048882	0.00031818
								454.049	0.05251	0.00048994	0.00031885
								455.049	0.0525089	0.00049105	0.00031952
								456.049	0.0525078	0.00049217	0.0003202
								457.049	0.0525067	0.00049328	0.00032087
								458.049	0.0525056	0.0004944	0.00032155
								459.049	0.0525045	0.00049551	0.00032222
								460.049	0.0525033	0.00049662	0.0003229
								461.049	0.0525022	0.00049774	0.00032357
								462.049	0.0525011	0.00049885	0.00032424
								463.049	0.0525	0.00049997	0.00032492
								464.049	0.0524989	0.00050108	0.00032559
								465.049	0.0524978	0.00050219	0.00032627
								466.049	0.0524967	0.00050331	0.00032694
								467.049	0.0524956	0.00050442	0.00032761
								468.049	0.0524944	0.00050554	0.00032829
								469.049	0.0524933	0.00050665	0.00032896
								470.049	0.0524922	0.00050776	0.00032964
								471.049	0.0524911	0.00050888	0.00033031
								472.049	0.05249	0.00050999	0.00033098
								473.049	0.0524889	0.0005111	0.00033166
								474.049	0.0524878	0.00051222	0.00033233
								475.049	0.0524867	0.00051333	0.00033301
								476.049	0.0524855	0.00051445	0.00033368
								477.049	0.0524844	0.00051556	0.00033435
								478.049	0.0524833	0.00051667	0.00033503
								479.049	0.0524822	0.00051779	0.0003357
								480.049	0.0524811	0.0005189	0.00033638
								481.049	0.05248	0.00052001	0.00033705
								482.049	0.0524789	0.00052113	0.00033772
								483.049	0.0524777	0.00052224	0.0003384
								484.049	0.0524766	0.00052335	0.00033907
								485.049	0.0524755	0.00052447	0.00033974
								486.049	0.0524744	0.00052558	0.00034042
								487.049	0.0524733	0.00052669	0.00034109
								488.049	0.0524722	0.00052781	0.00034177
								489.049	0.0524711	0.00052892	0.00034244
								490.049	0.05247	0.00053003	0.00034311
								491.049	0.0524688	0.00053114	0.00034379
								492.049	0.0524677	0.00053226	0.00034446
								493.049	0.0524666	0.00053337	0.00034513
								494.049	0.0524655	0.00053448	0.00034581
								495.049	0.0524644	0.0005356	0.00034648
								496.049	0.0524633	0.00053671	0.00034715
								497.049	0.0524622	0.00053782	0.00034783
								498.049	0.0524611	0.00053893	0.0003485
								499.049	0.0524599	0.00054005	0.00034917
								500.049	0.0524588	0.00054116	0.00034985
								501.049	0.0524577	0.00054227	0.00035052
								502.049	0.0524566	0.00054339	0.0003512
								503.049	0.0524555	0.0005445	0.00035187
								504.049	0.0524544	0.00054561	0.00035254
								505.049	0.0524533	0.00054672	0.00035322
								506.049	0.0524522	0.00054784	0.00035389
								507.049	0.052451	0.00054895	0.00035456
								508.049	0.0524499	0.00055006	0.00035524
								509.049	0.0524488	0.00055117	0.00035591
								510.049	0.0524477	0.00055228	0.00035658
								511.049	0.0524466	0.0005534	0.00035725
								512.049	0.0524455	0.00055451	0.00035793
								513.049	0.0524444	0.00055562	0.0003586
								514.049	0.0524433	0.00055673	0.00035927
								515.049	0.0524421	0.00055785	0.00035995
								516.049	0.052441	0.00055896	0.00036062
								517.049	0.0524399	0.00056007	0.00036129
								518.049	0.0524388	0.00056118	0.00036197
								519.049	0.0524377	0.00056229	0.00036264
								520.049	0.0524366	0.00056341	0.00036331
								521.049	0.0524355	0.00056452	0.00036399
								522.049	0.0524344	0.00056563	0.00036466
								523.049	0.0524333	0.00056674	0.00036533
								524.049	0.0524321	0.00056785	0.00036601
								525.049	0.052431	0.00056896	0.00036668
								526.049	0.0524299	0.00057008	0.00036735
								527.049	0.0524288	0.00057119	0.00036802
								528.049	0.0524277	0.0005723	0.0003687
								529.049	0.0524266	0.00057341	0.00036937
								530.049	0.0524255	0.00057452	0.00037004
								531.049	0.0524244	0.00057563	0.00037072
								532.049	0.0524232	0.00057675	0.00037139
								533.049	0.0524221	0.00057786	0.00037206
								534.049	0.052421	0.00057897	0.00037273
								535.049	0.0524199	0.00058008	0.00037341
								536.049	0.0524188	0.00058119	0.00037408
								537.049	0.0524177	0.0005823	0.00037475
								538.049	0.0524166	0.00058341	0.00037542
								539.049	0.0524155	0.00058452	0.0003761
								540.049	0.0524144	0.00058564	0.00037677
								541.049	0.0524133	0.00058675	0.00037744
								542.049	0.0524121	0.00058786	0.00037812
								543.049	0.052411	0.00058897	0.00037879
								544.049	0.0524099	0.00059008	0.00037946
								545.049	0.0524088	0.00059119	0.00038013
								546.049	0.0524077	0.0005923	0.00038081
								547.049	0.0524066	0.00059341	0.00038148
								548.049	0.0524055	0.00059452	0.00038215
								549.049	0.0524044	0.00059563	0.00038282
								550.049	0.0524032	0.00059675	0.0003835
								551.049	0.0524021	0.00059786	0.00038417
								552.049	0.052401	0.00059897	0.00038484
								553.049	0.0523999	0.00060008	0.00038551
								554.049	0.0523988	0.00060119	0.00038619
								555.049	0.0523977	0.0006023	0.00038686
								556.049	0.0523966	0.00060341	0.00038753
								557.049	0.0523955	0.00060452	0.0003882
								558.049	0.0523944	0.00060563	0.00038888
								559.049	0.0523933	0.00060674	0.00038955
								560.049	0.0523921	0.00060785	0.00039022
								561.049	0.052391	0.00060896	0.00039089
								562.049	0.0523899	0.00061007	0.00039156
								563.049	0.0523888	0.00061118	0.00039224
								564.049	0.0523877	0.00061229	0.00039291
								565.049	0.0523866	0.0006134	0.00039358
								566.049	0.0523855	0.00061451	0.00039425
								567.049	0.0523844	0.00061562	0.00039493
								568.049	0.0523833	0.00061673	0.0003956
								569.049	0.0523822	0.00061784	0.00039627
								570.049	0.052381	0.00061895	0.00039694
								571.049	0.0523799	0.00062006	0.00039761
								572.049	0.0523788	0.00062117	0.00039829
								573.049	0.0523777	0.00062228	0.00039896
								574.049	0.0523766	0.00062339	0.00039963
								575.049	0.0523755	0.0006245	0.0004003
								576.049	0.0523744	0.00062561	0.00040097
								577.049	0.0523733	0.00062672	0.00040165
								578.049	0.0523722	0.00062783	0.00040232
								579.049	0.0523711	0.00062894	0.00040299
								580.049	0.0523699	0.00063005	0.00040366
								581.049	0.0523688	0.00063116	0.00040433
								582.049	0.0523677	0.00063227	0.00040501
								583.049	0.0523666	0.00063338	0.00040568
								584.049	0.0523655	0.00063449	0.00040635
								585.049	0.0523644	0.0006356	0.00040702
								586.049	0.0523633	0.00063671	0.00040769
								587.049	0.0523622	0.00063782	0.00040836
								588.049	0.0523611	0.00063893	0.00040904
								589.049	0.05236	0.00064004	0.00040971
								590.049	0.0523588	0.00064115	0.00041038
								591.049	0.0523577	0.00064226	0.00041105
								592.049	0.0523566	0.00064336	0.00041172
								593.049	0.0523555	0.00064447	0.00041239
								594.049	0.0523544	0.00064558	0.00041307
								595.049	0.0523533	0.00064669	0.00041374
								596.049	0.0523522	0.0006478	0.00041441
								597.049	0.0523511	0.00064891	0.00041508
								598.049	0.05235	0.00065002	0.00041575
								599.049	0.0523489	0.00065113	0.00041642
								600.049	0.0523478	0.00065224	0.0004171
								601.049	0.0523467	0.00065335	0.00041777
								602.049	0.0523455	0.00065445	0.00041844
								603.049	0.0523444	0.00065556	0.00041911
								604.049	0.0523433	0.00065667	0.00041978
								605.049	0.0523422	0.00065778	0.00042045
								606.049	0.0523411	0.00065889	0.00042112
								607.049	0.05234	0.00066	0.0004218
								608.049	0.0523389	0.00066111	0.00042247
								609.049	0.0523378	0.00066222	0.00042314
								610.049	0.0523367	0.00066332	0.00042381
								611.049	0.0523356	0.00066443	0.00042448
								612.049	0.0523345	0.00066554	0.00042515
								613.049	0.0523334	0.00066665	0.00042582
								614.049	0.0523322	0.00066776	0.00042649
								615.049	0.0523311	0.00066887	0.00042717
								616.049	0.05233	0.00066997	0.00042784
								617.049	0.0523289	0.00067108	0.00042851
								618.049	0.0523278	0.00067219	0.00042918
								619.049	0.0523267	0.0006733	0.00042985
								620.049	0.0523256	0.00067441	0.00043052
								621.049	0.0523245	0.00067552	0.00043119
								622.049	0.0523234	0.00067662	0.00043186
								623.049	0.0523223	0.00067773	0.00043254
								624.049	0.0523212	0.00067884	0.00043321
								625.049	0.05232	0.00067995	0.00043388
								626.049	0.0523189	0.00068106	0.00043455
								627.049	0.0523178	0.00068216	0.00043522
								628.049	0.0523167	0.00068327	0.00043589
								629.049	0.0523156	0.00068438	0.00043656
								630.049	0.0523145	0.00068549	0.00043723
								631.049	0.0523134	0.00068659	0.0004379
								632.049	0.0523123	0.0006877	0.00043857
								633.049	0.0523112	0.00068881	0.00043925
								634.049	0.0523101	0.00068992	0.00043992
								635.049	0.052309	0.00069103	0.00044059
								636.049	0.0523079	0.00069213	0.00044126
								637.049	0.0523068	0.00069324	0.00044193
								638.049	0.0523057	0.00069435	0.0004426
								639.049	0.0523045	0.00069546	0.00044327
								640.049	0.0523034	0.00069656	0.00044394
								641.049	0.0523023	0.00069767	0.00044461
								642.049	0.0523012	0.00069878	0.00044528
								643.049	0.0523001	0.00069988	0.00044595
								644.049	0.052299	0.00070099	0.00044662
								645.049	0.0522979	0.0007021	0.00044729
								646.049	0.0522968	0.00070321	0.00044796
								647.049	0.0522957	0.00070431	0.00044864
								648.049	0.0522946	0.00070542	0.00044931
								649.049	0.0522935	0.00070653	0.00044998
								650.049	0.0522924	0.00070763	0.00045065
								651.049	0.0522913	0.00070874	0.00045132
								652.049	0.0522902	0.00070985	0.00045199
								653.049	0.052289	0.00071096	0.00045266
								654.049	0.0522879	0.00071206	0.00045333
								655.049	0.0522868	0.00071317	0.000454
								656.049	0.0522857	0.00071428	0.00045467
								657.049	0.0522846	0.00071538	0.00045534
								658.049	0.0522835	0.00071649	0.00045601
								659.049	0.0522824	0.0007176	0.00045668
								660.049	0.0522813	0.0007187	0.00045735
								661.049	0.0522802	0.00071981	0.00045802
								662.049	0.0522791	0.00072092	0.00045869
								663.049	0.052278	0.00072202	0.00045936
								664.049	0.0522769	0.00072313	0.00046003
								665.049	0.0522758	0.00072424	0.0004607
								666.049	0.0522747	0.00072534	0.00046137
								667.049	0.0522736	0.00072645	0.00046204
								668.049	0.0522724	0.00072756	0.00046271
								669.049	0.0522713	0.00072866	0.00046338
								670.049	0.0522702	0.00072977	0.00046405
								671.049	0.0522691	0.00073087	0.00046472
								672.049	0.052268	0.00073198	0.00046539
								673.049	0.0522669	0.00073309	0.00046606
								674.049	0.0522658	0.00073419	0.00046674
								675.049	0.0522647	0.0007353	0.00046741
								676.049	0.0522636	0.0007364	0.00046808
								677.049	0.0522625	0.00073751	0.00046875
								678.049	0.0522614	0.00073862	0.00046942
								679.049	0.0522603	0.00073972	0.00047009
								680.049	0.0522592	0.00074083	0.00047076
								681.049	0.0522581	0.00074193	0.00047143
								682.049	0.052257	0.00074304	0.0004721
								683.049	0.0522558	0.00074415	0.00047277
								684.049	0.0522548	0.00074525	0.00047344
								685.049	0.0522536	0.00074636	0.00047411
								686.049	0.0522525	0.00074746	0.00047477
								687.049	0.0522514	0.00074857	0.00047544
								688.049	0.0522503	0.00074967	0.00047611
								689.049	0.0522492	0.00075078	0.00047678
								690.049	0.0522481	0.00075189	0.00047745
								691.049	0.052247	0.00075299	0.00047812
								692.049	0.0522459	0.0007541	0.00047879
								693.049	0.0522448	0.0007552	0.00047946
								694.049	0.0522437	0.00075631	0.00048013
								695.049	0.0522426	0.00075741	0.0004808
								696.049	0.0522415	0.00075852	0.00048147
								697.049	0.0522404	0.00075962	0.00048214
								698.049	0.0522393	0.00076073	0.00048281
								699.049	0.0522382	0.00076183	0.00048348
								700.049	0.0522371	0.00076294	0.00048415
								701.049	0.052236	0.00076404	0.00048482
								702.049	0.0522348	0.00076515	0.00048549
								703.049	0.0522338	0.00076625	0.00048616
								704.049	0.0522326	0.00076736	0.00048683
								705.049	0.0522315	0.00076846	0.0004875
								706.049	0.0522304	0.00076957	0.00048817
								707.049	0.0522293	0.00077067	0.00048884
								708.049	0.0522282	0.00077178	0.00048951
								709.049	0.0522271	0.00077288	0.00049018
								710.049	0.052226	0.00077399	0.00049085
								711.049	0.0522249	0.00077509	0.00049152
								712.049	0.0522238	0.0007762	0.00049219
								713.049	0.0522227	0.0007773	0.00049285
								714.049	0.0522216	0.00077841	0.00049352
								715.049	0.0522205	0.00077951	0.00049419
								716.049	0.0522194	0.00078062	0.00049486
								717.049	0.0522183	0.00078172	0.00049553
								718.049	0.0522172	0.00078283	0.0004962
								719.049	0.0522161	0.00078393	0.00049687
								720.049	0.052215	0.00078503	0.00049754
								721.049	0.0522139	0.00078614	0.00049821
								722.049	0.0522128	0.00078724	0.00049888
								723.049	0.0522116	0.00078835	0.00049955
								724.049	0.0522106	0.00078945	0.00050022
								725.049	0.0522094	0.00079056	0.00050089
								726.049	0.0522083	0.00079166	0.00050155
								727.049	0.0522072	0.00079276	0.00050222
								728.049	0.0522061	0.00079387	0.00050289
								729.049	0.052205	0.00079497	0.00050356
								730.049	0.0522039	0.00079608	0.00050423
								731.049	0.0522028	0.00079718	0.0005049
								732.049	0.0522017	0.00079828	0.00050557
								733.049	0.0522006	0.00079939	0.00050624
								734.049	0.0521995	0.00080049	0.00050691
								735.049	0.0521984	0.0008016	0.00050758
								736.049	0.0521973	0.0008027	0.00050824
								737.049	0.0521962	0.0008038	0.00050891
								738.049	0.0521951	0.00080491	0.00050958
								739.049	0.052194	0.00080601	0.00051025
								740.049	0.0521929	0.00080712	0.00051092
								741.049	0.0521918	0.00080822	0.00051159
								742.049	0.0521907	0.00080932	0.00051226
								743.049	0.0521896	0.00081043	0.00051293
								744.049	0.0521885	0.00081153	0.0005136
								745.049	0.0521874	0.00081263	0.00051426
								746.049	0.0521863	0.00081374	0.00051493
								747.049	0.0521852	0.00081484	0.0005156
								748.049	0.0521841	0.00081594	0.00051627
								749.049	0.0521829	0.00081705	0.00051694
								750.049	0.0521819	0.00081815	0.00051761
								751.049	0.0521807	0.00081925	0.00051828
								752.049	0.0521796	0.00082036	0.00051894
								753.049	0.0521785	0.00082146	0.00051961
								754.049	0.0521774	0.00082256	0.00052028
								755.049	0.0521763	0.00082367	0.00052095
								756.049	0.0521752	0.00082477	0.00052162
								757.049	0.0521741	0.00082587	0.00052229
								758.049	0.052173	0.00082698	0.00052296
								759.049	0.0521719	0.00082808	0.00052362
								760.049	0.0521708	0.00082918	0.00052429
								761.049	0.0521697	0.00083028	0.00052496
								762.049	0.0521686	0.00083139	0.00052563
								763.049	0.0521675	0.00083249	0.0005263
								764.049	0.0521664	0.00083359	0.00052697
								765.049	0.0521653	0.0008347	0.00052763
								766.049	0.0521642	0.0008358	0.0005283
								767.049	0.0521631	0.0008369	0.00052897
								768.049	0.052162	0.000838	0.00052964
								769.049	0.0521609	0.00083911	0.00053031
								770.049	0.0521598	0.00084021	0.00053098
								771.049	0.0521587	0.00084131	0.00053164
								772.049	0.0521576	0.00084241	0.00053231
								773.049	0.0521565	0.00084352	0.00053298
								774.049	0.0521554	0.00084462	0.00053365
								775.049	0.0521543	0.00084572	0.00053432
								776.049	0.0521532	0.00084682	0.00053499
								777.049	0.0521521	0.00084793	0.00053565
								778.049	0.052151	0.00084903	0.00053632
								779.049	0.0521499	0.00085013	0.00053699
								780.049	0.0521488	0.00085123	0.00053766
								781.049	0.0521477	0.00085233	0.00053833
								782.049	0.0521466	0.00085344	0.00053899
								783.049	0.0521455	0.00085454	0.00053966
								784.049	0.0521444	0.00085564	0.00054033
								785.049	0.0521433	0.00085674	0.000541
								786.049	0.0521422	0.00085784	0.00054167
								787.049	0.0521411	0.00085895	0.00054233
								788.049	0.0521399	0.00086005	0.000543
								789.049	0.0521389	0.00086115	0.00054367
								790.049	0.0521377	0.00086225	0.00054434
								791.049	0.0521366	0.00086335	0.00054501
								792.049	0.0521355	0.00086446	0.00054567
								793.049	0.0521344	0.00086556	0.00054634
								794.049	0.0521333	0.00086666	0.00054701
								795.049	0.0521322	0.00086776	0.00054768
								796.049	0.0521311	0.00086886	0.00054835
								797.049	0.05213	0.00086996	0.00054901
								798.049	0.0521289	0.00087107	0.00054968
								799.049	0.0521278	0.00087217	0.00055035
								800.049	0.0521267	0.00087327	0.00055102
								801.049	0.0521256	0.00087437	0.00055168
								802.049	0.0521245	0.00087547	0.00055235
								803.049	0.0521234	0.00087657	0.00055302
								804.049	0.0521223	0.00087767	0.00055369
								805.049	0.0521212	0.00087877	0.00055435
								806.049	0.0521201	0.00087988	0.00055502
								807.049	0.052119	0.00088098	0.00055569
								808.049	0.0521179	0.00088208	0.00055636
								809.049	0.0521168	0.00088318	0.00055702
								810.049	0.0521157	0.00088428	0.00055769
								811.049	0.0521146	0.00088538	0.00055836
								812.049	0.0521135	0.00088648	0.00055903
								813.049	0.0521124	0.00088758	0.00055969
								814.049	0.0521113	0.00088868	0.00056036
								815.049	0.0521102	0.00088979	0.00056103
								816.049	0.0521091	0.00089089	0.0005617
								817.049	0.052108	0.00089199	0.00056236
								818.049	0.0521069	0.00089309	0.00056303
								819.049	0.0521058	0.00089419	0.0005637
								820.049	0.0521047	0.00089529	0.00056437
								821.049	0.0521036	0.00089639	0.00056503
								822.049	0.0521025	0.00089749	0.0005657
								823.049	0.0521014	0.00089859	0.00056637
								824.049	0.0521003	0.00089969	0.00056704
								825.049	0.0520992	0.00090079	0.0005677
								826.049	0.0520981	0.00090189	0.00056837
								827.049	0.052097	0.00090299	0.00056904
								828.049	0.0520959	0.00090409	0.0005697
								829.049	0.0520948	0.00090519	0.00057037
								830.049	0.0520937	0.00090629	0.00057104
								831.049	0.0520926	0.00090739	0.00057171
								832.049	0.0520915	0.00090849	0.00057237
								833.049	0.0520904	0.00090959	0.00057304
								834.049	0.0520893	0.0009107	0.00057371
								835.049	0.0520882	0.0009118	0.00057437
								836.049	0.0520871	0.0009129	0.00057504
								837.049	0.052086	0.000914	0.00057571
								838.049	0.0520849	0.0009151	0.00057637
								839.049	0.0520838	0.0009162	0.00057704
								840.049	0.0520827	0.0009173	0.00057771
								841.049	0.0520816	0.0009184	0.00057838
								842.049	0.0520805	0.0009195	0.00057904
								843.049	0.0520794	0.0009206	0.00057971
								844.049	0.0520783	0.00092169	0.00058038
								845.049	0.0520772	0.00092279	0.00058104
								846.049	0.0520761	0.00092389	0.00058171
								847.049	0.052075	0.00092499	0.00058238
								848.049	0.0520739	0.00092609	0.00058304
								849.049	0.0520728	0.00092719	0.00058371
								850.049	0.0520717	0.00092829	0.00058438
								851.049	0.0520706	0.00092939	0.00058504
								852.049	0.0520695	0.00093049	0.00058571
								853.049	0.0520684	0.00093159	0.00058638
								854.049	0.0520673	0.00093269	0.00058704
								855.049	0.0520662	0.00093379	0.00058771
								856.049	0.0520651	0.00093489	0.00058838
								857.049	0.052064	0.00093599	0.00058904
								858.049	0.0520629	0.00093709	0.00058971
								859.049	0.0520618	0.00093819	0.00059038
								860.049	0.0520607	0.00093929	0.00059104
								861.049	0.0520596	0.00094039	0.00059171
								862.049	0.0520585	0.00094149	0.00059238
								863.049	0.0520574	0.00094258	0.00059304
								864.049	0.0520563	0.00094368	0.00059371
								865.049	0.0520552	0.00094478	0.00059438
								866.049	0.0520541	0.00094588	0.00059504
								867.049	0.052053	0.00094698	0.00059571
								868.049	0.0520519	0.00094808	0.00059638
								869.049	0.0520508	0.00094918	0.00059704
								870.049	0.0520497	0.00095028	0.00059771
								871.049	0.0520486	0.00095138	0.00059837
								872.049	0.0520475	0.00095247	0.00059904
								873.049	0.0520464	0.00095357	0.00059971
								874.049	0.0520453	0.00095467	0.00060037
								875.049	0.0520442	0.00095577	0.00060104
								876.049	0.0520431	0.00095687	0.00060171
								877.049	0.052042	0.00095797	0.00060237
								878.049	0.0520409	0.00095907	0.00060304
								879.049	0.0520398	0.00096017	0.0006037
								880.049	0.0520387	0.00096126	0.00060437
								881.049	0.0520376	0.00096236	0.00060504
								882.049	0.0520365	0.00096346	0.0006057
								883.049	0.0520354	0.00096456	0.00060637
								884.049	0.0520343	0.00096566	0.00060704
								885.049	0.0520332	0.00096676	0.0006077
								886.049	0.0520321	0.00096785	0.00060837
								887.049	0.0520311	0.00096895	0.00060903
								888.049	0.0520299	0.00097005	0.0006097
								889.049	0.0520289	0.00097115	0.00061037
								890.049	0.0520277	0.00097225	0.00061103
								891.049	0.0520267	0.00097334	0.0006117
								892.049	0.0520256	0.00097444	0.00061236
								893.049	0.0520245	0.00097554	0.00061303
								894.049	0.0520234	0.00097664	0.0006137
								895.049	0.0520223	0.00097774	0.00061436
								896.049	0.0520212	0.00097883	0.00061503
								897.049	0.0520201	0.00097993	0.00061569
								898.049	0.052019	0.00098103	0.00061636
								899.049	0.0520179	0.00098213	0.00061702
								900.049	0.0520168	0.00098323	0.00061769
								901.049	0.0520157	0.00098432	0.00061836
								902.049	0.0520146	0.00098542	0.00061902
								903.049	0.0520135	0.00098652	0.00061969
								904.049	0.0520124	0.00098762	0.00062035
								905.049	0.0520113	0.00098871	0.00062102
								906.049	0.0520102	0.00098981	0.00062168
								907.049	0.0520091	0.00099091	0.00062235
								908.049	0.052008	0.00099201	0.00062302
								909.049	0.0520069	0.0009931	0.00062368
								910.049	0.0520058	0.0009942	0.00062435
								911.049	0.0520047	0.0009953	0.00062501
								912.049	0.0520036	0.0009964	0.00062568
								913.049	0.0520025	0.00099749	0.00062634
								914.049	0.0520014	0.00099859	0.00062701
								915.049	0.0520003	0.00099969	0.00062768
								916.049	0.0519992	0.00100078	0.00062834
								917.049	0.0519981	0.00100188	0.00062901
								918.049	0.051997	0.00100298	0.00062967
								919.049	0.0519959	0.00100408	0.00063034
								920.049	0.0519948	0.00100517	0.000631
								921.049	0.0519937	0.00100627	0.00063167
								922.049	0.0519926	0.00100737	0.00063233
								923.049	0.0519915	0.00100846	0.000633
								924.049	0.0519904	0.00100956	0.00063366
								925.049	0.0519893	0.00101066	0.00063433
								926.049	0.0519882	0.00101175	0.00063499
								927.049	0.0519872	0.00101285	0.00063566
								928.049	0.051986	0.00101395	0.00063633
								929.049	0.051985	0.00101504	0.00063699
								930.049	0.0519839	0.00101614	0.00063766
								931.049	0.0519828	0.00101724	0.00063832
								932.049	0.0519817	0.00101833	0.00063899
								933.049	0.0519806	0.00101943	0.00063965
								934.049	0.0519795	0.00102053	0.00064032
								935.049	0.0519784	0.00102162	0.00064098
								936.049	0.0519773	0.00102272	0.00064165
								937.049	0.0519762	0.00102382	0.00064231
								938.049	0.0519751	0.00102491	0.00064298
								939.049	0.051974	0.00102601	0.00064364
								940.049	0.0519729	0.0010271	0.00064431
								941.049	0.0519718	0.0010282	0.00064497
								942.049	0.0519707	0.0010293	0.00064564
								943.049	0.0519696	0.00103039	0.0006463
								944.049	0.0519685	0.00103149	0.00064697
								945.049	0.0519674	0.00103259	0.00064763
								946.049	0.0519663	0.00103368	0.0006483
								947.049	0.0519652	0.00103478	0.00064896
								948.049	0.0519641	0.00103587	0.00064963
								949.049	0.051963	0.00103697	0.00065029
								950.049	0.0519619	0.00103807	0.00065096
								951.049	0.0519608	0.00103916	0.00065162
								952.049	0.0519597	0.00104026	0.00065229
								953.049	0.0519587	0.00104135	0.00065295
								954.049	0.0519575	0.00104245	0.00065362
								955.049	0.0519565	0.00104354	0.00065428
								956.049	0.0519554	0.00104464	0.00065495
								957.049	0.0519543	0.00104574	0.00065561
								958.049	0.0519532	0.00104683	0.00065627
								959.049	0.0519521	0.00104793	0.00065694
								960.049	0.051951	0.00104902	0.0006576
								961.049	0.0519499	0.00105012	0.00065827
								962.049	0.0519488	0.00105121	0.00065893
								963.049	0.0519477	0.00105231	0.0006596
								964.049	0.0519466	0.0010534	0.00066026
								965.049	0.0519455	0.0010545	0.00066093
								966.049	0.0519444	0.00105559	0.00066159
								967.049	0.0519433	0.00105669	0.00066226
								968.049	0.0519422	0.00105779	0.00066292
								969.049	0.0519411	0.00105888	0.00066359
								970.049	0.05194	0.00105998	0.00066425
								971.049	0.0519389	0.00106107	0.00066491
								972.049	0.0519378	0.00106217	0.00066558
								973.049	0.0519367	0.00106326	0.00066624
								974.049	0.0519356	0.00106436	0.00066691
								975.049	0.0519346	0.00106545	0.00066757
								976.049	0.0519334	0.00106655	0.00066824
								977.049	0.0519324	0.00106764	0.0006689
								978.049	0.0519313	0.00106874	0.00066956
								979.049	0.0519302	0.00106983	0.00067023
								980.049	0.0519291	0.00107093	0.00067089
								981.049	0.051928	0.00107202	0.00067156
								982.049	0.0519269	0.00107311	0.00067222
								983.049	0.0519258	0.00107421	0.00067289
								984.049	0.0519247	0.0010753	0.00067355
								985.049	0.0519236	0.0010764	0.00067421
								986.049	0.0519225	0.00107749	0.00067488
								987.049	0.0519214	0.00107859	0.00067554
								988.049	0.0519203	0.00107968	0.00067621
								989.049	0.0519192	0.00108078	0.00067687
								990.049	0.0519181	0.00108187	0.00067754
								991.049	0.051917	0.00108297	0.0006782
								992.049	0.0519159	0.00108406	0.00067886
								993.049	0.0519148	0.00108515	0.00067953
								994.049	0.0519138	0.00108625	0.00068019
								995.049	0.0519127	0.00108734	0.00068086
								996.049	0.0519116	0.00108844	0.00068152
								997.049	0.0519105	0.00108953	0.00068218
								998.049	0.0519094	0.00109063	0.00068285
								999.049	0.0519083	0.00109172	0.00068351
								1000.05	0.0519072	0.00109281	0.00068418
								1001.05	0.0519061	0.00109391	0.00068484
								1002.05	0.051905	0.001095	0.0006855
								1003.05	0.0519039	0.0010961	0.00068617
								1004.05	0.0519028	0.00109719	0.00068683
								1005.05	0.0519017	0.00109828	0.00068749
								1006.05	0.0519006	0.00109938	0.00068816
								1007.05	0.0518995	0.00110047	0.00068882
								1008.05	0.0518984	0.00110156	0.00068949
								1009.05	0.0518973	0.00110266	0.00069015
								1010.05	0.0518962	0.00110375	0.00069081
								1011.05	0.0518952	0.00110485	0.00069148
								1012.05	0.0518941	0.00110594	0.00069214
								1013.05	0.051893	0.00110703	0.0006928
								1014.05	0.0518919	0.00110813	0.00069347
								1015.05	0.0518908	0.00110922	0.00069413
								1016.05	0.0518897	0.00111031	0.0006948
								1017.05	0.0518886	0.00111141	0.00069546
								1018.05	0.0518875	0.0011125	0.00069612
								1019.05	0.0518864	0.00111359	0.00069679
								1020.05	0.0518853	0.00111469	0.00069745
								1021.05	0.0518842	0.00111578	0.00069811
								1022.05	0.0518831	0.00111687	0.00069878
								1023.05	0.051882	0.00111797	0.00069944
								1024.05	0.0518809	0.00111906	0.0007001
								1025.05	0.0518798	0.00112015	0.00070077
								1026.05	0.0518788	0.00112125	0.00070143
								1027.05	0.0518777	0.00112234	0.00070209
								1028.05	0.0518766	0.00112343	0.00070276
								1029.05	0.0518755	0.00112452	0.00070342
								1030.05	0.0518744	0.00112562	0.00070408
								1031.05	0.0518733	0.00112671	0.00070475
								1032.05	0.0518722	0.0011278	0.00070541
								1033.05	0.0518711	0.0011289	0.00070607
								1034.05	0.05187	0.00112999	0.00070674
								1035.05	0.0518689	0.00113108	0.0007074
								1036.05	0.0518678	0.00113217	0.00070806
								1037.05	0.0518667	0.00113327	0.00070873
								1038.05	0.0518656	0.00113436	0.00070939
								1039.05	0.0518646	0.00113545	0.00071005
								1040.05	0.0518634	0.00113655	0.00071072
								1041.05	0.0518624	0.00113764	0.00071138
								1042.05	0.0518613	0.00113873	0.00071204
								1043.05	0.0518602	0.00113982	0.00071271
								1044.05	0.0518591	0.00114092	0.00071337
								1045.05	0.051858	0.00114201	0.00071403
								1046.05	0.0518569	0.0011431	0.00071469
								1047.05	0.0518558	0.00114419	0.00071536
								1048.05	0.0518547	0.00114528	0.00071602
								1049.05	0.0518536	0.00114638	0.00071668
								1050.05	0.0518525	0.00114747	0.00071735
								1051.05	0.0518514	0.00114856	0.00071801
								1052.05	0.0518504	0.00114965	0.00071867
								1053.05	0.0518492	0.00115075	0.00071934
								1054.05	0.0518482	0.00115184	0.00072
								1055.05	0.0518471	0.00115293	0.00072066
								1056.05	0.051846	0.00115402	0.00072132
								1057.05	0.0518449	0.00115511	0.00072199
								1058.05	0.0518438	0.00115621	0.00072265
								1059.05	0.0518427	0.0011573	0.00072331
								1060.05	0.0518416	0.00115839	0.00072398
								1061.05	0.0518405	0.00115948	0.00072464
								1062.05	0.0518394	0.00116057	0.0007253
								1063.05	0.0518383	0.00116166	0.00072596
								1064.05	0.0518372	0.00116276	0.00072663
								1065.05	0.0518361	0.00116385	0.00072729
								1066.05	0.0518351	0.00116494	0.00072795
								1067.05	0.051834	0.00116603	0.00072861
								1068.05	0.0518329	0.00116712	0.00072928
								1069.05	0.0518318	0.00116821	0.00072994
								1070.05	0.0518307	0.00116931	0.0007306
								1071.05	0.0518296	0.0011704	0.00073126
								1072.05	0.0518285	0.00117149	0.00073193
								1073.05	0.0518274	0.00117258	0.00073259
								1074.05	0.0518263	0.00117367	0.00073325
								1075.05	0.0518252	0.00117476	0.00073391
								1076.05	0.0518241	0.00117585	0.00073458
								1077.05	0.0518231	0.00117695	0.00073524
								1078.05	0.051822	0.00117804	0.0007359
								1079.05	0.0518209	0.00117913	0.00073656
								1080.05	0.0518198	0.00118022	0.00073723
								1081.05	0.0518187	0.00118131	0.00073789
								1082.05	0.0518176	0.0011824	0.00073855
								1083.05	0.0518165	0.00118349	0.00073921
								1084.05	0.0518154	0.00118458	0.00073988
								1085.05	0.0518143	0.00118567	0.00074054
								1086.05	0.0518132	0.00118676	0.0007412
								1087.05	0.0518121	0.00118786	0.00074186
								1088.05	0.051811	0.00118895	0.00074253
								1089.05	0.05181	0.00119004	0.00074319
								1090.05	0.0518089	0.00119113	0.00074385
								1091.05	0.0518078	0.00119222	0.00074451
								1092.05	0.0518067	0.00119331	0.00074517
								1093.05	0.0518056	0.0011944	0.00074584
								1094.05	0.0518045	0.00119549	0.0007465
								1095.05	0.0518034	0.00119658	0.00074716
								1096.05	0.0518023	0.00119767	0.00074782
								1097.05	0.0518012	0.00119876	0.00074848
								1098.05	0.0518002	0.00119985	0.00074915
								1099.05	0.0517991	0.00120094	0.00074981
								1100.05	0.051798	0.00120203	0.00075047
								1101.05	0.0517969	0.00120312	0.00075113
								1102.05	0.0517958	0.00120421	0.00075179
								1103.05	0.0517947	0.0012053	0.00075246
								1104.05	0.0517936	0.00120639	0.00075312
								1105.05	0.0517925	0.00120748	0.00075378
								1106.05	0.0517914	0.00120857	0.00075444
								1107.05	0.0517903	0.00120967	0.0007551
								1108.05	0.0517892	0.00121076	0.00075577
								1109.05	0.0517881	0.00121185	0.00075643
								1110.05	0.0517871	0.00121294	0.00075709
								1111.05	0.051786	0.00121403	0.00075775
								1112.05	0.0517849	0.00121512	0.00075841
								1113.05	0.0517838	0.00121621	0.00075908
								1114.05	0.0517827	0.00121729	0.00075974
								1115.05	0.0517816	0.00121838	0.0007604
								1116.05	0.0517805	0.00121947	0.00076106
								1117.05	0.0517794	0.00122056	0.00076172
								1118.05	0.0517784	0.00122165	0.00076238
								1119.05	0.0517773	0.00122274	0.00076305
								1120.05	0.0517762	0.00122383	0.00076371
								1121.05	0.0517751	0.00122492	0.00076437
								1122.05	0.051774	0.00122601	0.00076503
								1123.05	0.0517729	0.0012271	0.00076569
								1124.05	0.0517718	0.00122819	0.00076635
								1125.05	0.0517707	0.00122928	0.00076702
								1126.05	0.0517696	0.00123037	0.00076768
								1127.05	0.0517685	0.00123146	0.00076834
								1128.05	0.0517674	0.00123255	0.000769
								1129.05	0.0517664	0.00123364	0.00076966
								1130.05	0.0517653	0.00123473	0.00077032
								1131.05	0.0517642	0.00123582	0.00077098
								1132.05	0.0517631	0.00123691	0.00077165
								1133.05	0.051762	0.001238	0.00077231
								1134.05	0.0517609	0.00123908	0.00077297
								1135.05	0.0517598	0.00124017	0.00077363
								1136.05	0.0517587	0.00124126	0.00077429
								1137.05	0.0517577	0.00124235	0.00077495
								1138.05	0.0517566	0.00124344	0.00077561
								1139.05	0.0517555	0.00124453	0.00077627
								1140.05	0.0517544	0.00124562	0.00077694
								1141.05	0.0517533	0.00124671	0.0007776
								1142.05	0.0517522	0.0012478	0.00077826
								1143.05	0.0517511	0.00124889	0.00077892
								1144.05	0.05175	0.00124997	0.00077958
								1145.05	0.0517489	0.00125106	0.00078024
								1146.05	0.0517478	0.00125215	0.0007809
								1147.05	0.0517468	0.00125324	0.00078156
								1148.05	0.0517457	0.00125433	0.00078223
								1149.05	0.0517446	0.00125542	0.00078289
								1150.05	0.0517435	0.00125651	0.00078355
								1151.05	0.0517424	0.00125759	0.00078421
								1152.05	0.0517413	0.00125868	0.00078487
								1153.05	0.0517402	0.00125977	0.00078553
								1154.05	0.0517391	0.00126086	0.00078619
								1155.05	0.0517381	0.00126195	0.00078685
								1156.05	0.051737	0.00126304	0.00078751
								1157.05	0.0517359	0.00126413	0.00078817
								1158.05	0.0517348	0.00126521	0.00078884
								1159.05	0.0517337	0.0012663	0.0007895
								1160.05	0.0517326	0.00126739	0.00079016
								1161.05	0.0517315	0.00126848	0.00079082
								1162.05	0.0517304	0.00126957	0.00079148
								1163.05	0.0517294	0.00127065	0.00079214
								1164.05	0.0517283	0.00127174	0.0007928
								1165.05	0.0517272	0.00127283	0.00079346
								1166.05	0.0517261	0.00127392	0.00079412
								1167.05	0.051725	0.00127501	0.00079478
								1168.05	0.0517239	0.00127609	0.00079544
								1169.05	0.0517228	0.00127718	0.0007961
								1170.05	0.0517217	0.00127827	0.00079677
								1171.05	0.0517206	0.00127936	0.00079743
								1172.05	0.0517196	0.00128045	0.00079809
								1173.05	0.0517185	0.00128153	0.00079875
								1174.05	0.0517174	0.00128262	0.00079941
								1175.05	0.0517163	0.00128371	0.00080007
								1176.05	0.0517152	0.0012848	0.00080073
								1177.05	0.0517141	0.00128588	0.00080139
								1178.05	0.051713	0.00128697	0.00080205
								1179.05	0.0517119	0.00128806	0.00080271
								1180.05	0.0517109	0.00128915	0.00080337
								1181.05	0.0517098	0.00129023	0.00080403
								1182.05	0.0517087	0.00129132	0.00080469
								1183.05	0.0517076	0.00129241	0.00080535
								1184.05	0.0517065	0.0012935	0.00080601
								1185.05	0.0517054	0.00129458	0.00080667
								1186.05	0.0517043	0.00129567	0.00080733
								1187.05	0.0517032	0.00129676	0.00080799
								1188.05	0.0517022	0.00129784	0.00080865
								1189.05	0.0517011	0.00129893	0.00080932
								1190.05	0.0517	0.00130002	0.00080998
								1191.05	0.0516989	0.00130111	0.00081064
								1192.05	0.0516978	0.00130219	0.0008113
								1193.05	0.0516967	0.00130328	0.00081196
								1194.05	0.0516956	0.00130437	0.00081262
								1195.05	0.0516945	0.00130545	0.00081328
								1196.05	0.0516935	0.00130654	0.00081394
								1197.05	0.0516924	0.00130763	0.0008146
								1198.05	0.0516913	0.00130871	0.00081526
								1199.05	0.0516902	0.0013098	0.00081592
								1200.05	0.0516891	0.00131089	0.00081658
								1201.05	0.051688	0.00131197	0.00081724
								1202.05	0.0516869	0.00131306	0.0008179
								1203.05	0.0516858	0.00131415	0.00081856
								1204.05	0.0516848	0.00131523	0.00081922
								1205.05	0.0516837	0.00131632	0.00081988
								1206.05	0.0516826	0.00131741	0.00082054
								1207.05	0.0516815	0.00131849	0.0008212
								1208.05	0.0516804	0.00131958	0.00082186
								1209.05	0.0516793	0.00132067	0.00082252
								1210.05	0.0516783	0.00132175	0.00082318
								1211.05	0.0516772	0.00132284	0.00082384
								1212.05	0.0516761	0.00132393	0.0008245
								1213.05	0.051675	0.00132501	0.00082516
								1214.05	0.0516739	0.0013261	0.00082582
								1215.05	0.0516728	0.00132718	0.00082648
								1216.05	0.0516717	0.00132827	0.00082714
								1217.05	0.0516706	0.00132936	0.0008278
								1218.05	0.0516696	0.00133044	0.00082846
								1219.05	0.0516685	0.00133153	0.00082912
								1220.05	0.0516674	0.00133261	0.00082978
								1221.05	0.0516663	0.0013337	0.00083044
								1222.05	0.0516652	0.00133479	0.0008311
								1223.05	0.0516641	0.00133587	0.00083176
								1224.05	0.051663	0.00133696	0.00083242
								1225.05	0.051662	0.00133804	0.00083308
								1226.05	0.0516609	0.00133913	0.00083373
								1227.05	0.0516598	0.00134022	0.00083439
								1228.05	0.0516587	0.0013413	0.00083505
								1229.05	0.0516576	0.00134239	0.00083571
								1230.05	0.0516565	0.00134347	0.00083637
								1231.05	0.0516554	0.00134456	0.00083703
								1232.05	0.0516544	0.00134564	0.00083769
								1233.05	0.0516533	0.00134673	0.00083835
								1234.05	0.0516522	0.00134781	0.00083901
								1235.05	0.0516511	0.0013489	0.00083967
								1236.05	0.05165	0.00134999	0.00084033
								1237.05	0.0516489	0.00135107	0.00084099
								1238.05	0.0516478	0.00135216	0.00084165
								1239.05	0.0516468	0.00135324	0.00084231
								1240.05	0.0516457	0.00135433	0.00084297
								1241.05	0.0516446	0.00135541	0.00084363
								1242.05	0.0516435	0.0013565	0.00084429
								1243.05	0.0516424	0.00135758	0.00084495
								1244.05	0.0516413	0.00135867	0.00084561
								1245.05	0.0516402	0.00135975	0.00084626
								1246.05	0.0516392	0.00136084	0.00084692
								1247.05	0.0516381	0.00136192	0.00084758
								1248.05	0.051637	0.00136301	0.00084824
								1249.05	0.0516359	0.00136409	0.0008489
								1250.05	0.0516348	0.00136518	0.00084956
								1251.05	0.0516337	0.00136626	0.00085022
								1252.05	0.0516327	0.00136735	0.00085088
								1253.05	0.0516316	0.00136843	0.00085154
								1254.05	0.0516305	0.00136952	0.0008522
								1255.05	0.0516294	0.0013706	0.00085286
								1256.05	0.0516283	0.00137169	0.00085352
								1257.05	0.0516272	0.00137277	0.00085417
								1258.05	0.0516261	0.00137386	0.00085483
								1259.05	0.0516251	0.00137494	0.00085549
								1260.05	0.051624	0.00137603	0.00085615
								1261.05	0.0516229	0.00137711	0.00085681
								1262.05	0.0516218	0.00137819	0.00085747
								1263.05	0.0516207	0.00137928	0.00085813
								1264.05	0.0516196	0.00138036	0.00085879
								1265.05	0.0516185	0.00138145	0.00085945
								1266.05	0.0516175	0.00138253	0.00086011
								1267.05	0.0516164	0.00138362	0.00086076
								1268.05	0.0516153	0.0013847	0.00086142
								1269.05	0.0516142	0.00138578	0.00086208
								1270.05	0.0516131	0.00138687	0.00086274
								1271.05	0.051612	0.00138795	0.0008634
								1272.05	0.051611	0.00138904	0.00086406
								1273.05	0.0516099	0.00139012	0.00086472
								1274.05	0.0516088	0.00139121	0.00086538
								1275.05	0.0516077	0.00139229	0.00086603
								1276.05	0.0516066	0.00139337	0.00086669
								1277.05	0.0516055	0.00139446	0.00086735
								1278.05	0.0516045	0.00139554	0.00086801
								1279.05	0.0516034	0.00139662	0.00086867
								1280.05	0.0516023	0.00139771	0.00086933
								1281.05	0.0516012	0.00139879	0.00086999
								1282.05	0.0516001	0.00139988	0.00087065
								1283.05	0.051599	0.00140096	0.0008713
								1284.05	0.051598	0.00140204	0.00087196
								1285.05	0.0515969	0.00140313	0.00087262
								1286.05	0.0515958	0.00140421	0.00087328
								1287.05	0.0515947	0.00140529	0.00087394
								1288.05	0.0515936	0.00140638	0.0008746
								1289.05	0.0515925	0.00140746	0.00087525
								1290.05	0.0515914	0.00140854	0.00087591
								1291.05	0.0515904	0.00140963	0.00087657
								1292.05	0.0515893	0.00141071	0.00087723
								1293.05	0.0515882	0.0014118	0.00087789
								1294.05	0.0515871	0.00141288	0.00087855
								1295.05	0.051586	0.00141396	0.00087921
								1296.05	0.0515849	0.00141505	0.00087986
								1297.05	0.0515839	0.00141613	0.00088052
								1298.05	0.0515828	0.00141721	0.00088118
								1299.05	0.0515817	0.00141829	0.00088184
								1300.05	0.0515806	0.00141938	0.0008825
								1301.05	0.0515795	0.00142046	0.00088316
								1302.05	0.0515785	0.00142154	0.00088381
								1303.05	0.0515774	0.00142263	0.00088447
								1304.05	0.0515763	0.00142371	0.00088513
								1305.05	0.0515752	0.00142479	0.00088579
								1306.05	0.0515741	0.00142588	0.00088645
								1307.05	0.051573	0.00142696	0.0008871
								1308.05	0.051572	0.00142804	0.00088776
								1309.05	0.0515709	0.00142912	0.00088842
								1310.05	0.0515698	0.00143021	0.00088908
								1311.05	0.0515687	0.00143129	0.00088974
								1312.05	0.0515676	0.00143237	0.00089039
								1313.05	0.0515666	0.00143345	0.00089105
								1314.05	0.0515655	0.00143454	0.00089171
								1315.05	0.0515644	0.00143562	0.00089237
								1316.05	0.0515633	0.0014367	0.00089303
								1317.05	0.0515622	0.00143778	0.00089368
								1318.05	0.0515611	0.00143887	0.00089434
								1319.05	0.0515601	0.00143995	0.000895
								1320.05	0.051559	0.00144103	0.00089566
								1321.05	0.0515579	0.00144211	0.00089632
								1322.05	0.0515568	0.0014432	0.00089697
								1323.05	0.0515557	0.00144428	0.00089763
								1324.05	0.0515546	0.00144536	0.00089829
								1325.05	0.0515536	0.00144644	0.00089895
								1326.05	0.0515525	0.00144753	0.00089961
								1327.05	0.0515514	0.00144861	0.00090026
								1328.05	0.0515503	0.00144969	0.00090092
								1329.05	0.0515492	0.00145077	0.00090158
								1330.05	0.0515482	0.00145185	0.00090224
								1331.05	0.0515471	0.00145294	0.00090289
								1332.05	0.051546	0.00145402	0.00090355
								1333.05	0.0515449	0.0014551	0.00090421
								1334.05	0.0515438	0.00145618	0.00090487
								1335.05	0.0515427	0.00145726	0.00090552
								1336.05	0.0515417	0.00145835	0.00090618
								1337.05	0.0515406	0.00145943	0.00090684
								1338.05	0.0515395	0.00146051	0.0009075
								1339.05	0.0515384	0.00146159	0.00090815
								1340.05	0.0515373	0.00146267	0.00090881
								1341.05	0.0515362	0.00146375	0.00090947
								1342.05	0.0515352	0.00146484	0.00091013
								1343.05	0.0515341	0.00146592	0.00091078
								1344.05	0.051533	0.001467	0.00091144
								1345.05	0.0515319	0.00146808	0.0009121
								1346.05	0.0515308	0.00146916	0.00091276
								1347.05	0.0515298	0.00147024	0.00091341
								1348.05	0.0515287	0.00147132	0.00091407
								1349.05	0.0515276	0.00147241	0.00091473
								1350.05	0.0515265	0.00147349	0.00091539
								1351.05	0.0515254	0.00147457	0.00091604
								1352.05	0.0515243	0.00147565	0.0009167
								1353.05	0.0515233	0.00147673	0.00091736
								1354.05	0.0515222	0.00147781	0.00091802
								1355.05	0.0515211	0.00147889	0.00091867
								1356.05	0.05152	0.00147997	0.00091933
								1357.05	0.051519	0.00148105	0.00091999
								1358.05	0.0515179	0.00148214	0.00092064
								1359.05	0.0515168	0.00148322	0.0009213
								1360.05	0.0515157	0.0014843	0.00092196
								1361.05	0.0515146	0.00148538	0.00092262
								1362.05	0.0515135	0.00148646	0.00092327
								1363.05	0.0515125	0.00148754	0.00092393
								1364.05	0.0515114	0.00148862	0.00092459
								1365.05	0.0515103	0.0014897	0.00092524
								1366.05	0.0515092	0.00149078	0.0009259
								1367.05	0.0515081	0.00149186	0.00092656
								1368.05	0.0515071	0.00149294	0.00092721
								1369.05	0.051506	0.00149402	0.00092787
								1370.05	0.0515049	0.00149511	0.00092853
								1371.05	0.0515038	0.00149619	0.00092919
								1372.05	0.0515027	0.00149727	0.00092984
								1373.05	0.0515017	0.00149835	0.0009305
								1374.05	0.0515006	0.00149943	0.00093116
								1375.05	0.0514995	0.00150051	0.00093181
								1376.05	0.0514984	0.00150159	0.00093247
								1377.05	0.0514973	0.00150267	0.00093313
								1378.05	0.0514963	0.00150375	0.00093378
								1379.05	0.0514952	0.00150483	0.00093444
								1380.05	0.0514941	0.00150591	0.0009351
								1381.05	0.051493	0.00150699	0.00093575
								1382.05	0.0514919	0.00150807	0.00093641
								1383.05	0.0514908	0.00150915	0.00093707
								1384.05	0.0514898	0.00151023	0.00093772
								1385.05	0.0514887	0.00151131	0.00093838
								1386.05	0.0514876	0.00151239	0.00093904
								1387.05	0.0514865	0.00151347	0.00093969
								1388.05	0.0514855	0.00151455	0.00094035
								1389.05	0.0514844	0.00151563	0.00094101
								1390.05	0.0514833	0.00151671	0.00094166
								1391.05	0.0514822	0.00151779	0.00094232
								1392.05	0.0514811	0.00151887	0.00094298
								1393.05	0.05148	0.00151995	0.00094363
								1394.05	0.051479	0.00152103	0.00094429
								1395.05	0.0514779	0.00152211	0.00094495
								1396.05	0.0514768	0.00152319	0.0009456
								1397.05	0.0514757	0.00152427	0.00094626
								1398.05	0.0514746	0.00152535	0.00094692
								1399.05	0.0514736	0.00152643	0.00094757
								1400.05	0.0514725	0.00152751	0.00094823
								1401.05	0.0514714	0.00152858	0.00094888
								1402.05	0.0514703	0.00152966	0.00094954
								1403.05	0.0514693	0.00153074	0.0009502
								1404.05	0.0514682	0.00153182	0.00095085
								1405.05	0.0514671	0.0015329	0.00095151
								1406.05	0.051466	0.00153398	0.00095217
								1407.05	0.0514649	0.00153506	0.00095282
								1408.05	0.0514639	0.00153614	0.00095348
								1409.05	0.0514628	0.00153722	0.00095414
								1410.05	0.0514617	0.0015383	0.00095479
								1411.05	0.0514606	0.00153938	0.00095545
								1412.05	0.0514595	0.00154046	0.0009561
								1413.05	0.0514585	0.00154154	0.00095676
								1414.05	0.0514574	0.00154261	0.00095742
								1415.05	0.0514563	0.00154369	0.00095807
								1416.05	0.0514552	0.00154477	0.00095873
								1417.05	0.0514541	0.00154585	0.00095938
								1418.05	0.0514531	0.00154693	0.00096004
								1419.05	0.051452	0.00154801	0.0009607
								1420.05	0.0514509	0.00154909	0.00096135
								1421.05	0.0514498	0.00155017	0.00096201
								1422.05	0.0514488	0.00155125	0.00096266
								1423.05	0.0514477	0.00155232	0.00096332
								1424.05	0.0514466	0.0015534	0.00096398
								1425.05	0.0514455	0.00155448	0.00096463
								1426.05	0.0514444	0.00155556	0.00096529
								1427.05	0.0514434	0.00155664	0.00096594
								1428.05	0.0514423	0.00155772	0.0009666
								1429.05	0.0514412	0.00155879	0.00096726
								1430.05	0.0514401	0.00155987	0.00096791
								1431.05	0.0514391	0.00156095	0.00096857
								1432.05	0.051438	0.00156203	0.00096922
								1433.05	0.0514369	0.00156311	0.00096988
								1434.05	0.0514358	0.00156419	0.00097053
								1435.05	0.0514347	0.00156526	0.00097119
								1436.05	0.0514337	0.00156634	0.00097185
								1437.05	0.0514326	0.00156742	0.0009725
								1438.05	0.0514315	0.0015685	0.00097316
								1439.05	0.0514304	0.00156958	0.00097381
								1440.05	0.0514293	0.00157066	0.00097447
								1441.05	0.0514283	0.00157173	0.00097512
								1442.05	0.0514272	0.00157281	0.00097578
								1443.05	0.0514261	0.00157389	0.00097644
								1444.05	0.051425	0.00157497	0.00097709
								1445.05	0.051424	0.00157605	0.00097775
								1446.05	0.0514229	0.00157712	0.0009784
								1447.05	0.0514218	0.0015782	0.00097906
								1448.05	0.0514207	0.00157928	0.00097971
								1449.05	0.0514196	0.00158036	0.00098037
								1450.05	0.0514186	0.00158143	0.00098102
								1451.05	0.0514175	0.00158251	0.00098168
								1452.05	0.0514164	0.00158359	0.00098234
								1453.05	0.0514153	0.00158467	0.00098299
								1454.05	0.0514143	0.00158574	0.00098365
								1455.05	0.0514132	0.00158682	0.0009843
								1456.05	0.0514121	0.0015879	0.00098496
								1457.05	0.051411	0.00158898	0.00098561
								1458.05	0.05141	0.00159005	0.00098627
								1459.05	0.0514089	0.00159113	0.00098692
								1460.05	0.0514078	0.00159221	0.00098758
								1461.05	0.0514067	0.00159329	0.00098823
								1462.05	0.0514056	0.00159436	0.00098889
								1463.05	0.0514046	0.00159544	0.00098954
								1464.05	0.0514035	0.00159652	0.0009902
								1465.05	0.0514024	0.00159759	0.00099085
								1466.05	0.0514013	0.00159867	0.00099151
								1467.05	0.0514003	0.00159975	0.00099216
								1468.05	0.0513992	0.00160083	0.00099282
								1469.05	0.0513981	0.0016019	0.00099347
								1470.05	0.051397	0.00160298	0.00099413
								1471.05	0.0513959	0.00160406	0.00099478
								1472.05	0.0513949	0.00160513	0.00099544
								1473.05	0.0513938	0.00160621	0.00099609
								1474.05	0.0513927	0.00160729	0.00099675
								1475.05	0.0513916	0.00160836	0.0009974
								1476.05	0.0513906	0.00160944	0.00099806
								1477.05	0.0513895	0.00161052	0.00099871
								1478.05	0.0513884	0.00161159	0.00099937
								1479.05	0.0513873	0.00161267	0.00100002
								1480.05	0.0513863	0.00161375	0.00100068
								1481.05	0.0513852	0.00161482	0.00100133
								1482.05	0.0513841	0.0016159	0.00100199
								1483.05	0.051383	0.00161698	0.00100264
								1484.05	0.051382	0.00161805	0.0010033
								1485.05	0.0513809	0.00161913	0.00100395
								1486.05	0.0513798	0.00162021	0.00100461
								1487.05	0.0513787	0.00162128	0.00100526
								1488.05	0.0513776	0.00162236	0.00100592
								1489.05	0.0513766	0.00162344	0.00100657
								1490.05	0.0513755	0.00162451	0.00100723
								1491.05	0.0513744	0.00162559	0.00100788
								1492.05	0.0513733	0.00162666	0.00100854
								1493.05	0.0513723	0.00162774	0.00100919
								1494.05	0.0513712	0.00162882	0.00100985
								1495.05	0.0513701	0.00162989	0.0010105
								1496.05	0.051369	0.00163097	0.00101116
								1497.05	0.051368	0.00163204	0.00101181
								1498.05	0.0513669	0.00163312	0.00101246
								1499.05	0.0513658	0.0016342	0.00101312
								1500.05	0.0513647	0.00163527	0.00101377
								1501.05	0.0513636	0.00163635	0.00101443
								1502.05	0.0513626	0.00163742	0.00101508
								1503.05	0.0513615	0.0016385	0.00101574
								1504.05	0.0513604	0.00163958	0.00101639
								1505.05	0.0513593	0.00164065	0.00101705
								1506.05	0.0513583	0.00164173	0.0010177
								1507.05	0.0513572	0.0016428	0.00101835
								1508.05	0.0513561	0.00164388	0.00101901
								1509.05	0.051355	0.00164495	0.00101966
								1510.05	0.051354	0.00164603	0.00102032
								1511.05	0.0513529	0.0016471	0.00102097
								1512.05	0.0513518	0.00164818	0.00102163
								1513.05	0.0513507	0.00164926	0.00102228
								1514.05	0.0513497	0.00165033	0.00102294
								1515.05	0.0513486	0.00165141	0.00102359
								1516.05	0.0513475	0.00165248	0.00102424
								1517.05	0.0513464	0.00165356	0.0010249
								1518.05	0.0513454	0.00165463	0.00102555
								1519.05	0.0513443	0.00165571	0.00102621
								1520.05	0.0513432	0.00165678	0.00102686
								1521.05	0.0513421	0.00165786	0.00102751
								1522.05	0.0513411	0.00165893	0.00102817
								1523.05	0.05134	0.00166001	0.00102882
								1524.05	0.0513389	0.00166108	0.00102948
								1525.05	0.0513378	0.00166216	0.00103013
								1526.05	0.0513368	0.00166323	0.00103078
								1527.05	0.0513357	0.00166431	0.00103144
								1528.05	0.0513346	0.00166538	0.00103209
								1529.05	0.0513335	0.00166646	0.00103275
								1530.05	0.0513325	0.00166753	0.0010334
								1531.05	0.0513314	0.00166861	0.00103405
								1532.05	0.0513303	0.00166968	0.00103471
								1533.05	0.0513292	0.00167076	0.00103536
								1534.05	0.0513282	0.00167183	0.00103602
								1535.05	0.0513271	0.00167291	0.00103667
								1536.05	0.051326	0.00167398	0.00103732
								1537.05	0.0513249	0.00167506	0.00103798
								1538.05	0.0513239	0.00167613	0.00103863
								1539.05	0.0513228	0.0016772	0.00103929
								1540.05	0.0513217	0.00167828	0.00103994
								1541.05	0.0513207	0.00167935	0.00104059
								1542.05	0.0513196	0.00168043	0.00104125
								1543.05	0.0513185	0.0016815	0.0010419
								1544.05	0.0513174	0.00168258	0.00104255
								1545.05	0.0513163	0.00168365	0.00104321
								1546.05	0.0513153	0.00168472	0.00104386
								1547.05	0.0513142	0.0016858	0.00104452
								1548.05	0.0513131	0.00168687	0.00104517
								1549.05	0.051312	0.00168795	0.00104582
								1550.05	0.051311	0.00168902	0.00104648
								1551.05	0.0513099	0.0016901	0.00104713
								1552.05	0.0513088	0.00169117	0.00104778
								1553.05	0.0513078	0.00169224	0.00104844
								1554.05	0.0513067	0.00169332	0.00104909
								1555.05	0.0513056	0.00169439	0.00104974
								1556.05	0.0513045	0.00169547	0.0010504
								1557.05	0.0513035	0.00169654	0.00105105
								1558.05	0.0513024	0.00169761	0.0010517
								1559.05	0.0513013	0.00169869	0.00105236
								1560.05	0.0513002	0.00169976	0.00105301
								1561.05	0.0512992	0.00170083	0.00105366
								1562.05	0.0512981	0.00170191	0.00105432
								1563.05	0.051297	0.00170298	0.00105497
								1564.05	0.0512959	0.00170406	0.00105562
								1565.05	0.0512949	0.00170513	0.00105628
								1566.05	0.0512938	0.0017062	0.00105693
								1567.05	0.0512927	0.00170728	0.00105758
								1568.05	0.0512917	0.00170835	0.00105824
								1569.05	0.0512906	0.00170942	0.00105889
								1570.05	0.0512895	0.0017105	0.00105954
								1571.05	0.0512884	0.00171157	0.0010602
								1572.05	0.0512874	0.00171264	0.00106085
								1573.05	0.0512863	0.00171372	0.0010615
								1574.05	0.0512852	0.00171479	0.00106216
								1575.05	0.0512841	0.00171586	0.00106281
								1576.05	0.0512831	0.00171694	0.00106346
								1577.05	0.051282	0.00171801	0.00106412
								1578.05	0.0512809	0.00171908	0.00106477
								1579.05	0.0512799	0.00172015	0.00106542
								1580.05	0.0512788	0.00172123	0.00106608
								1581.05	0.0512777	0.0017223	0.00106673
								1582.05	0.0512766	0.00172337	0.00106738
								1583.05	0.0512756	0.00172445	0.00106803
								1584.05	0.0512745	0.00172552	0.00106869
								1585.05	0.0512734	0.00172659	0.00106934
								1586.05	0.0512723	0.00172767	0.00106999
								1587.05	0.0512713	0.00172874	0.00107065
								1588.05	0.0512702	0.00172981	0.0010713
								1589.05	0.0512691	0.00173088	0.00107195
								1590.05	0.051268	0.00173196	0.0010726
								1591.05	0.051267	0.00173303	0.00107326
								1592.05	0.0512659	0.0017341	0.00107391
								1593.05	0.0512648	0.00173517	0.00107456
								1594.05	0.0512637	0.00173625	0.00107522
								1595.05	0.0512627	0.00173732	0.00107587
								1596.05	0.0512616	0.00173839	0.00107652
								1597.05	0.0512605	0.00173946	0.00107717
								1598.05	0.0512595	0.00174054	0.00107783
								1599.05	0.0512584	0.00174161	0.00107848
								1600.05	0.0512573	0.00174268	0.00107913
								1601.05	0.0512563	0.00174375	0.00107979
								1602.05	0.0512552	0.00174483	0.00108044
								1603.05	0.0512541	0.0017459	0.00108109
								1604.05	0.051253	0.00174697	0.00108174
								1605.05	0.051252	0.00174804	0.0010824
								1606.05	0.0512509	0.00174911	0.00108305
								1607.05	0.0512498	0.00175019	0.0010837
								1608.05	0.0512487	0.00175126	0.00108435
								1609.05	0.0512477	0.00175233	0.00108501
								1610.05	0.0512466	0.0017534	0.00108566
								1611.05	0.0512455	0.00175447	0.00108631
								1612.05	0.0512444	0.00175555	0.00108696
								1613.05	0.0512434	0.00175662	0.00108762
								1614.05	0.0512423	0.00175769	0.00108827
								1615.05	0.0512412	0.00175876	0.00108892
								1616.05	0.0512402	0.00175983	0.00108957
								1617.05	0.0512391	0.0017609	0.00109022
								1618.05	0.051238	0.00176198	0.00109088
								1619.05	0.051237	0.00176305	0.00109153
								1620.05	0.0512359	0.00176412	0.00109218
								1621.05	0.0512348	0.00176519	0.00109283
								1622.05	0.0512337	0.00176626	0.00109349
								1623.05	0.0512327	0.00176733	0.00109414
								1624.05	0.0512316	0.00176841	0.00109479
								1625.05	0.0512305	0.00176948	0.00109544
								1626.05	0.0512295	0.00177055	0.0010961
								1627.05	0.0512284	0.00177162	0.00109675
								1628.05	0.0512273	0.00177269	0.0010974
								1629.05	0.0512262	0.00177376	0.00109805
								1630.05	0.0512252	0.00177483	0.0010987
								1631.05	0.0512241	0.0017759	0.00109936
								1632.05	0.051223	0.00177698	0.00110001
								1633.05	0.051222	0.00177805	0.00110066
								1634.05	0.0512209	0.00177912	0.00110131
								1635.05	0.0512198	0.00178019	0.00110196
								1636.05	0.0512187	0.00178126	0.00110262
								1637.05	0.0512177	0.00178233	0.00110327
								1638.05	0.0512166	0.0017834	0.00110392
								1639.05	0.0512155	0.00178447	0.00110457
								1640.05	0.0512145	0.00178554	0.00110522
								1641.05	0.0512134	0.00178661	0.00110588
								1642.05	0.0512123	0.00178769	0.00110653
								1643.05	0.0512112	0.00178876	0.00110718
								1644.05	0.0512102	0.00178983	0.00110783
								1645.05	0.0512091	0.0017909	0.00110848
								1646.05	0.051208	0.00179197	0.00110914
								1647.05	0.051207	0.00179304	0.00110979
								1648.05	0.0512059	0.00179411	0.00111044
								1649.05	0.0512048	0.00179518	0.00111109
								1650.05	0.0512037	0.00179625	0.00111174
								1651.05	0.0512027	0.00179732	0.00111239
								1652.05	0.0512016	0.00179839	0.00111305
								1653.05	0.0512005	0.00179946	0.0011137
								1654.05	0.0511995	0.00180053	0.00111435
								1655.05	0.0511984	0.0018016	0.001115
								1656.05	0.0511973	0.00180267	0.00111565
								1657.05	0.0511963	0.00180374	0.0011163
								1658.05	0.0511952	0.00180481	0.00111696
								1659.05	0.0511941	0.00180588	0.00111761
								1660.05	0.051193	0.00180695	0.00111826
								1661.05	0.051192	0.00180802	0.00111891
								1662.05	0.0511909	0.00180909	0.00111956
								1663.05	0.0511898	0.00181016	0.00112021
								1664.05	0.0511888	0.00181123	0.00112086
								1665.05	0.0511877	0.0018123	0.00112152
								1666.05	0.0511866	0.00181337	0.00112217
								1667.05	0.0511856	0.00181444	0.00112282
								1668.05	0.0511845	0.00181551	0.00112347
								1669.05	0.0511834	0.00181658	0.00112412
								1670.05	0.0511824	0.00181765	0.00112477
								1671.05	0.0511813	0.00181872	0.00112542
								1672.05	0.0511802	0.00181979	0.00112608
								1673.05	0.0511791	0.00182086	0.00112673
								1674.05	0.0511781	0.00182193	0.00112738
								1675.05	0.051177	0.001823	0.00112803
								1676.05	0.0511759	0.00182407	0.00112868
								1677.05	0.0511749	0.00182514	0.00112933
								1678.05	0.0511738	0.00182621	0.00112998
								1679.05	0.0511727	0.00182728	0.00113063
								1680.05	0.0511716	0.00182835	0.00113129
								1681.05	0.0511706	0.00182942	0.00113194
								1682.05	0.0511695	0.00183049	0.00113259
								1683.05	0.0511684	0.00183156	0.00113324
								1684.05	0.0511674	0.00183263	0.00113389
								1685.05	0.0511663	0.0018337	0.00113454
								1686.05	0.0511652	0.00183477	0.00113519
								1687.05	0.0511642	0.00183584	0.00113584
								1688.05	0.0511631	0.0018369	0.00113649
								1689.05	0.051162	0.00183797	0.00113715
								1690.05	0.051161	0.00183904	0.0011378
								1691.05	0.0511599	0.00184011	0.00113845
								1692.05	0.0511588	0.00184118	0.0011391
								1693.05	0.0511578	0.00184225	0.00113975
								1694.05	0.0511567	0.00184332	0.0011404
								1695.05	0.0511556	0.00184439	0.00114105
								1696.05	0.0511545	0.00184546	0.0011417
								1697.05	0.0511535	0.00184653	0.00114235
								1698.05	0.0511524	0.00184759	0.001143
								1699.05	0.0511513	0.00184866	0.00114365
								1700.05	0.0511503	0.00184973	0.00114431
								1701.05	0.0511492	0.0018508	0.00114496
								1702.05	0.0511481	0.00185187	0.00114561
								1703.05	0.0511471	0.00185294	0.00114626
								1704.05	0.051146	0.00185401	0.00114691
								1705.05	0.0511449	0.00185508	0.00114756
								1706.05	0.0511439	0.00185614	0.00114821
								1707.05	0.0511428	0.00185721	0.00114886
								1708.05	0.0511417	0.00185828	0.00114951
								1709.05	0.0511407	0.00185935	0.00115016
								1710.05	0.0511396	0.00186042	0.00115081
								1711.05	0.0511385	0.00186149	0.00115146
								1712.05	0.0511375	0.00186255	0.00115211
								1713.05	0.0511364	0.00186362	0.00115276
								1714.05	0.0511353	0.00186469	0.00115342
								1715.05	0.0511342	0.00186576	0.00115407
								1716.05	0.0511332	0.00186683	0.00115472
								1717.05	0.0511321	0.0018679	0.00115537
								1718.05	0.051131	0.00186896	0.00115602
								1719.05	0.05113	0.00187003	0.00115667
								1720.05	0.0511289	0.0018711	0.00115732
								1721.05	0.0511278	0.00187217	0.00115797
								1722.05	0.0511268	0.00187324	0.00115862
								1723.05	0.0511257	0.0018743	0.00115927
								1724.05	0.0511246	0.00187537	0.00115992
								1725.05	0.0511236	0.00187644	0.00116057
								1726.05	0.0511225	0.00187751	0.00116122
								1727.05	0.0511214	0.00187857	0.00116187
								1728.05	0.0511204	0.00187964	0.00116252
								1729.05	0.0511193	0.00188071	0.00116317
								1730.05	0.0511182	0.00188178	0.00116382
								1731.05	0.0511172	0.00188285	0.00116447
								1732.05	0.0511161	0.00188391	0.00116512
								1733.05	0.051115	0.00188498	0.00116577
								1734.05	0.0511139	0.00188605	0.00116642
								1735.05	0.0511129	0.00188712	0.00116707
								1736.05	0.0511118	0.00188818	0.00116772
								1737.05	0.0511108	0.00188925	0.00116837
								1738.05	0.0511097	0.00189032	0.00116902
								1739.05	0.0511086	0.00189139	0.00116967
								1740.05	0.0511076	0.00189245	0.00117032
								1741.05	0.0511065	0.00189352	0.00117097
								1742.05	0.0511054	0.00189459	0.00117162
								1743.05	0.0511043	0.00189565	0.00117227
								1744.05	0.0511033	0.00189672	0.00117292
								1745.05	0.0511022	0.00189779	0.00117357
								1746.05	0.0511011	0.00189886	0.00117422
								1747.05	0.0511001	0.00189992	0.00117487
								1748.05	0.051099	0.00190099	0.00117552
								1749.05	0.0510979	0.00190206	0.00117617
								1750.05	0.0510969	0.00190312	0.00117682
								1751.05	0.0510958	0.00190419	0.00117747
								1752.05	0.0510947	0.00190526	0.00117812
								1753.05	0.0510937	0.00190633	0.00117877
								1754.05	0.0510926	0.00190739	0.00117942
								1755.05	0.0510915	0.00190846	0.00118007
								1756.05	0.0510905	0.00190953	0.00118072
								1757.05	0.0510894	0.00191059	0.00118137
								1758.05	0.0510883	0.00191166	0.00118202
								1759.05	0.0510873	0.00191273	0.00118267
								1760.05	0.0510862	0.00191379	0.00118332
								1761.05	0.0510851	0.00191486	0.00118397
								1762.05	0.0510841	0.00191593	0.00118462
								1763.05	0.051083	0.00191699	0.00118527
								1764.05	0.0510819	0.00191806	0.00118592
								1765.05	0.0510809	0.00191912	0.00118657
								1766.05	0.0510798	0.00192019	0.00118722
								1767.05	0.0510787	0.00192126	0.00118787
								1768.05	0.0510777	0.00192232	0.00118852
								1769.05	0.0510766	0.00192339	0.00118917
								1770.05	0.0510755	0.00192446	0.00118982
								1771.05	0.0510745	0.00192552	0.00119047
								1772.05	0.0510734	0.00192659	0.00119112
								1773.05	0.0510723	0.00192766	0.00119177
								1774.05	0.0510713	0.00192872	0.00119241
								1775.05	0.0510702	0.00192979	0.00119306
								1776.05	0.0510692	0.00193085	0.00119371
								1777.05	0.0510681	0.00193192	0.00119436
								1778.05	0.051067	0.00193299	0.00119501
								1779.05	0.0510659	0.00193405	0.00119566
								1780.05	0.0510649	0.00193512	0.00119631
								1781.05	0.0510638	0.00193618	0.00119696
								1782.05	0.0510627	0.00193725	0.00119761
								1783.05	0.0510617	0.00193831	0.00119826
								1784.05	0.0510606	0.00193938	0.00119891
								1785.05	0.0510596	0.00194045	0.00119956
								1786.05	0.0510585	0.00194151	0.00120021
								1787.05	0.0510574	0.00194258	0.00120086
								1788.05	0.0510564	0.00194364	0.0012015
								1789.05	0.0510553	0.00194471	0.00120215
								1790.05	0.0510542	0.00194577	0.0012028
								1791.05	0.0510532	0.00194684	0.00120345
								1792.05	0.0510521	0.00194791	0.0012041
								1793.05	0.051051	0.00194897	0.00120475
								1794.05	0.05105	0.00195004	0.0012054
								1795.05	0.0510489	0.0019511	0.00120605
								1796.05	0.0510478	0.00195217	0.0012067
								1797.05	0.0510468	0.00195323	0.00120735
								1798.05	0.0510457	0.0019543	0.001208
								1799.05	0.0510446	0.00195536	0.00120864
								1800.05	0.0510436	0.00195643	0.00120929
								1801.05	0.0510425	0.00195749	0.00120994
								1802.05	0.0510414	0.00195856	0.00121059
								1803.05	0.0510404	0.00195962	0.00121124
								1804.05	0.0510393	0.00196069	0.00121189
								1805.05	0.0510383	0.00196175	0.00121254
								1806.05	0.0510372	0.00196282	0.00121319
								1807.05	0.0510361	0.00196388	0.00121384
								1808.05	0.051035	0.00196495	0.00121448
								1809.05	0.051034	0.00196601	0.00121513
								1810.05	0.0510329	0.00196708	0.00121578
								1811.05	0.0510319	0.00196814	0.00121643
								1812.05	0.0510308	0.00196921	0.00121708
								1813.05	0.0510297	0.00197027	0.00121773
								1814.05	0.0510287	0.00197134	0.00121838
								1815.05	0.0510276	0.0019724	0.00121903
								1816.05	0.0510265	0.00197347	0.00121967
								1817.05	0.0510255	0.00197453	0.00122032
								1818.05	0.0510244	0.0019756	0.00122097
								1819.05	0.0510233	0.00197666	0.00122162
								1820.05	0.0510223	0.00197772	0.00122227
								1821.05	0.0510212	0.00197879	0.00122292
								1822.05	0.0510202	0.00197985	0.00122357
								1823.05	0.0510191	0.00198092	0.00122421
								1824.05	0.051018	0.00198198	0.00122486
								1825.05	0.0510169	0.00198305	0.00122551
								1826.05	0.0510159	0.00198411	0.00122616
								1827.05	0.0510148	0.00198518	0.00122681
								1828.05	0.0510138	0.00198624	0.00122746
								1829.05	0.0510127	0.0019873	0.00122811
								1830.05	0.0510116	0.00198837	0.00122875
								1831.05	0.0510106	0.00198943	0.0012294
								1832.05	0.0510095	0.0019905	0.00123005
								1833.05	0.0510084	0.00199156	0.0012307
								1834.05	0.0510074	0.00199262	0.00123135
								1835.05	0.0510063	0.00199369	0.001232
								1836.05	0.0510053	0.00199475	0.00123264
								1837.05	0.0510042	0.00199582	0.00123329
								1838.05	0.0510031	0.00199688	0.00123394
								1839.05	0.0510021	0.00199794	0.00123459
								1840.05	0.051001	0.00199901	0.00123524
								1841.05	0.0509999	0.00200007	0.00123589
								1842.05	0.0509989	0.00200113	0.00123653
								1843.05	0.0509978	0.0020022	0.00123718
								1844.05	0.0509967	0.00200326	0.00123783
								1845.05	0.0509957	0.00200433	0.00123848
								1846.05	0.0509946	0.00200539	0.00123913
								1847.05	0.0509935	0.00200645	0.00123977
								1848.05	0.0509925	0.00200752	0.00124042
								1849.05	0.0509914	0.00200858	0.00124107
								1850.05	0.0509904	0.00200964	0.00124172
								1851.05	0.0509893	0.00201071	0.00124237
								1852.05	0.0509882	0.00201177	0.00124301
								1853.05	0.0509872	0.00201283	0.00124366
								1854.05	0.0509861	0.0020139	0.00124431
								1855.05	0.050985	0.00201496	0.00124496
								1856.05	0.050984	0.00201602	0.00124561
								1857.05	0.0509829	0.00201709	0.00124625
								1858.05	0.0509819	0.00201815	0.0012469
								1859.05	0.0509808	0.00201921	0.00124755
								1860.05	0.0509797	0.00202028	0.0012482
								1861.05	0.0509787	0.00202134	0.00124885
								1862.05	0.0509776	0.0020224	0.00124949
								1863.05	0.0509765	0.00202346	0.00125014
								1864.05	0.0509755	0.00202453	0.00125079
								1865.05	0.0509744	0.00202559	0.00125144
								1866.05	0.0509734	0.00202665	0.00125208
								1867.05	0.0509723	0.00202772	0.00125273
								1868.05	0.0509712	0.00202878	0.00125338
								1869.05	0.0509702	0.00202984	0.00125403
								1870.05	0.0509691	0.0020309	0.00125468
								1871.05	0.050968	0.00203197	0.00125532
								1872.05	0.050967	0.00203303	0.00125597
								1873.05	0.0509659	0.00203409	0.00125662
								1874.05	0.0509648	0.00203516	0.00125727
								1875.05	0.0509638	0.00203622	0.00125791
								1876.05	0.0509627	0.00203728	0.00125856
								1877.05	0.0509617	0.00203834	0.00125921
								1878.05	0.0509606	0.00203941	0.00125986
								1879.05	0.0509595	0.00204047	0.0012605
								1880.05	0.0509585	0.00204153	0.00126115
								1881.05	0.0509574	0.00204259	0.0012618
								1882.05	0.0509563	0.00204365	0.00126245
								1883.05	0.0509553	0.00204472	0.00126309
								1884.05	0.0509542	0.00204578	0.00126374
								1885.05	0.0509532	0.00204684	0.00126439
								1886.05	0.0509521	0.0020479	0.00126504
								1887.05	0.050951	0.00204897	0.00126568
								1888.05	0.05095	0.00205003	0.00126633
								1889.05	0.0509489	0.00205109	0.00126698
								1890.05	0.0509479	0.00205215	0.00126763
								1891.05	0.0509468	0.00205321	0.00126827
								1892.05	0.0509457	0.00205428	0.00126892
								1893.05	0.0509447	0.00205534	0.00126957
								1894.05	0.0509436	0.0020564	0.00127021
								1895.05	0.0509425	0.00205746	0.00127086
								1896.05	0.0509415	0.00205852	0.00127151
								1897.05	0.0509404	0.00205959	0.00127216
								1898.05	0.0509394	0.00206065	0.0012728
								1899.05	0.0509383	0.00206171	0.00127345
								1900.05	0.0509372	0.00206277	0.0012741
								1901.05	0.0509362	0.00206383	0.00127474
								1902.05	0.0509351	0.00206489	0.00127539
								1903.05	0.050934	0.00206596	0.00127604
								1904.05	0.050933	0.00206702	0.00127669
								1905.05	0.0509319	0.00206808	0.00127733
								1906.05	0.0509309	0.00206914	0.00127798
								1907.05	0.0509298	0.0020702	0.00127863
								1908.05	0.0509287	0.00207126	0.00127927
								1909.05	0.0509277	0.00207232	0.00127992
								1910.05	0.0509266	0.00207339	0.00128057
								1911.05	0.0509255	0.00207445	0.00128121
								1912.05	0.0509245	0.00207551	0.00128186
								1913.05	0.0509234	0.00207657	0.00128251
								1914.05	0.0509224	0.00207763	0.00128316
								1915.05	0.0509213	0.00207869	0.0012838
								1916.05	0.0509203	0.00207975	0.00128445
								1917.05	0.0509192	0.00208081	0.0012851
								1918.05	0.0509181	0.00208187	0.00128574
								1919.05	0.0509171	0.00208294	0.00128639
								1920.05	0.050916	0.002084	0.00128704
								1921.05	0.0509149	0.00208506	0.00128768
								1922.05	0.0509139	0.00208612	0.00128833
								1923.05	0.0509128	0.00208718	0.00128898
								1924.05	0.0509118	0.00208824	0.00128962
								1925.05	0.0509107	0.0020893	0.00129027
								1926.05	0.0509096	0.00209036	0.00129092
								1927.05	0.0509086	0.00209142	0.00129156
								1928.05	0.0509075	0.00209248	0.00129221
								1929.05	0.0509065	0.00209354	0.00129286
								1930.05	0.0509054	0.0020946	0.0012935
								1931.05	0.0509043	0.00209567	0.00129415
								1932.05	0.0509033	0.00209673	0.0012948
								1933.05	0.0509022	0.00209779	0.00129544
								1934.05	0.0509011	0.00209885	0.00129609
								1935.05	0.0509001	0.00209991	0.00129674
								1936.05	0.050899	0.00210097	0.00129738
								1937.05	0.050898	0.00210203	0.00129803
								1938.05	0.0508969	0.00210309	0.00129867
								1939.05	0.0508958	0.00210415	0.00129932
								1940.05	0.0508948	0.00210521	0.00129997
								1941.05	0.0508937	0.00210627	0.00130061
								1942.05	0.0508927	0.00210733	0.00130126
								1943.05	0.0508916	0.00210839	0.00130191
								1944.05	0.0508905	0.00210945	0.00130255
								1945.05	0.0508895	0.00211051	0.0013032
								1946.05	0.0508884	0.00211157	0.00130385
								1947.05	0.0508874	0.00211263	0.00130449
								1948.05	0.0508863	0.00211369	0.00130514
								1949.05	0.0508852	0.00211475	0.00130578
								1950.05	0.0508842	0.00211581	0.00130643
								1951.05	0.0508831	0.00211687	0.00130708
								1952.05	0.0508821	0.00211793	0.00130772
								1953.05	0.050881	0.00211899	0.00130837
								1954.05	0.05088	0.00212005	0.00130901
								1955.05	0.0508789	0.00212111	0.00130966
								1956.05	0.0508778	0.00212217	0.00131031
								1957.05	0.0508768	0.00212323	0.00131095
								1958.05	0.0508757	0.00212429	0.0013116
								1959.05	0.0508747	0.00212535	0.00131225
								1960.05	0.0508736	0.00212641	0.00131289
								1961.05	0.0508725	0.00212747	0.00131354
								1962.05	0.0508715	0.00212853	0.00131418
								1963.05	0.0508704	0.00212959	0.00131483
								1964.05	0.0508694	0.00213064	0.00131548
								1965.05	0.0508683	0.0021317	0.00131612
								1966.05	0.0508672	0.00213276	0.00131677
								1967.05	0.0508662	0.00213382	0.00131741
								1968.05	0.0508651	0.00213488	0.00131806
								1969.05	0.0508641	0.00213594	0.0013187
								1970.05	0.050863	0.002137	0.00131935
								1971.05	0.0508619	0.00213806	0.00132
								1972.05	0.0508609	0.00213912	0.00132064
								1973.05	0.0508598	0.00214018	0.00132129
								1974.05	0.0508588	0.00214124	0.00132193
								1975.05	0.0508577	0.0021423	0.00132258
								1976.05	0.0508566	0.00214336	0.00132323
								1977.05	0.0508556	0.00214441	0.00132387
[truncated: 68,023 more rows]

## Sheet: BuDABCOI_BuI_DMSO_50C
Measured and fit concentrations (molar) vs. time (seconds) for the reaction BuDABCOI + BuI ® Bu2-DABCO-I2 in DMSO-d6 at 50 C. The side reaction BuI + DMSO ® DMSO·BuI is also considered.
The fit of the data was performed using a kinetic model of the reaction with the Berkeley-Madonna program.
TIME_MEAS	Bu2DABCOI2_MEAS	BuDABCOI_MEAS	BuDMSOI_MEAS	TIME_FIT	BuDABCOI_FIT	Bu2DABCOI2_FIT	BuDMSOI_FIT		METHOD STIFF
0	0	0	0	0	0	0	0
71	0.000375	0.0439	0	1e-06	0	0	0		STARTTIME = 0
187	0.000563	0.0473	0	3e-06	1e-08	0	0		STOPTIME = 65000
303	0.000938	0.0473	0	7e-06	2e-08	0	0		DT = 0.02
419	0.00113	0.0461	0.00113	1.5e-05	3e-08	0	0
535	0.0015	0.045	0.00113	3.1e-05	7e-08	0	0		{RXN1: DABCO + 2.5BuI --> BuDABCOI + 1.5BuI}
651	0.00169	0.0439	0.00113	6.3e-05	1.4e-07	0	0		{RXN2: BuDABCOI + BuI --> Bu2DABCOI2}
767	0.00206	0.0439	0.00225	0.000127	2.8e-07	0	0		{RXN3: DMSO +BuI --> BuDMSOI}
883	0.00244	0.0428	0.00225	0.000255	5.6e-07	0	0
999	0.00263	0.0439	0.00225	0.000511	1.12e-06	0	0		RXN1 = K1f*DABCO*(2*BuI) - K1r*BuDABCOI*BuI
1115	0.003	0.0439	0.00225	0.001023	2.24e-06	0	1e-08		RXN2 = K2f*BuDABCOI*BuI - K2r*Bu2DABCOI2
1231	0.00319	0.0428	0.00338	0.002047	4.47e-06	0	1e-08		RXN3 = K3f*DMSO*BuI - K3r*BuDMSOI
1587	0.00413	0.0428	0.0045	0.004095	8.95e-06	0	2e-08
1943	0.00488	0.0405	0.0045	0.008191	1.789e-05	0	5e-08		K1f = 0.18842
2299	0.00563	0.0405	0.00563	0.016383	3.578e-05	0	9e-08		K1r = 0
2655	0.00638	0.0405	0.00563	0.032767	7.153e-05	0	1.9e-07		K2f = 0.0008407
3011	0.00713	0.0394	0.00675	0.065535	0.00014291	0	3.7e-07		K2r = 0
3367	0.00806	0.0394	0.00788	0.131071	0.00028524	0	7.4e-07		K3f = 000048011
3723	0.00863	0.0383	0.00788	0.262143	0.00056814	1e-08	1.49e-06		K3r = 0.00021362
4079	0.00919	0.0383	0.00788	0.524287	0.00112701	3e-08	2.96e-06
4435	0.00975	0.0371	0.009	1.04858	0.00221779	1.2e-07	5.9e-06		d/dt(DABCO) = -RXN1
4791	0.0105	0.036	0.009	2.04858	0.00420361	4.3e-07	1.143e-05		d/dt(BuI) = -RXN1-RXN2
5147	0.0113	0.0371	0.009	3.04858	0.00607376	9.2e-07	1.686e-05		d/dt(BuDABCOI) = RXN1-RXN2
5503	0.0116	0.036	0.0101	4.04857	0.00783744	1.57e-06	2.22e-05		d/dt(Bu2DABCOI2) = RXN2
5859	0.0124	0.0349	0.0101	5.04857	0.00950294	2.37e-06	2.746e-05		d/dt(BuDMSOI) = RXN3
6215	0.0129	0.0349	0.0101	6.04857	0.0110777	3.3e-06	3.264e-05		d/dt(DMSO) = -RXN3
6571	0.0137	0.0338	0.0101	7.04857	0.0125684	4.36e-06	3.775e-05
6927	0.0141	0.0338	0.0101	8.04857	0.0139811	5.54e-06	4.278e-05		INIT BuI = 0.11834
7283	0.0146	0.0326	0.0101	9.04857	0.0153214	6.81e-06	4.775e-05		INIT DABCO = 0.049
7639	0.0152	0.0326	0.0113	10.0486	0.0165942	8.19e-06	5.265e-05		INIT BuDABCOI = 0
7995	0.0154	0.0326	0.0113	11.0486	0.017804	9.65e-06	5.749e-05		INIT Bu2DABCOI2 = 0
8351	0.0161	0.0315	0.0113	12.0486	0.0189552	1.119e-05	6.228e-05		INIT BuDMSOI = 0
9007	0.0169	0.0304	0.0113	13.0486	0.0200513	1.281e-05	6.701e-05		INIT DMSO = 1
9663	0.0174	0.0293	0.0113	14.0486	0.021096	1.45e-05	7.169e-05
10319	0.0182	0.0293	0.0113	15.0486	0.0220924	1.626e-05	7.631e-05
10975	0.0193	0.0281	0.0113	16.0486	0.0230434	1.808e-05	8.089e-05		Name	Value
11631	0.0201	0.0281	0.0113	17.0486	0.0239519	1.995e-05	8.543e-05		STARTTIME	0
12287	0.021	0.027	0.0113	18.0486	0.0248202	2.188e-05	8.992e-05		STOPTIME	65000
12943	0.0218	0.0259	0.0113	19.0486	0.0256507	2.385e-05	9.436e-05		DTMIN	1e-06
13599	0.0221	0.0259	0.0113	20.0486	0.0264456	2.587e-05	9.877e-05		DTMAX	1
14255	0.0227	0.0248	0.0101	21.0486	0.0272067	2.793e-05	0.00010314		DTOUT	0
14911	0.0234	0.0236	0.0113	22.0486	0.0279361	3.004e-05	0.00010747		TOLERANCE	0.01
15567	0.0238	0.0236	0.0101	23.0486	0.0286353	3.218e-05	0.00011177		K1f *	0.18842
16223	0.0244	0.0225	0.0101	24.0486	0.029306	3.435e-05	0.00011603		K1r	0
16879	0.0251	0.0214	0.0101	25.0486	0.0299497	3.656e-05	0.00012026		K2f *	0.0008407
17535	0.0253	0.0214	0.0101	26.0486	0.0305676	3.88e-05	0.00012446		K2r	0
18191	0.0263	0.0203	0.0101	27.0486	0.0311613	4.107e-05	0.00012863		K3f *	4.8011e-05
18847	0.0268	0.0203	0.0101	28.0486	0.0317318	4.336e-05	0.00013277		K3r *	0.00021362
20703	0.0279	0.0203	0.0101	29.0486	0.0322803	4.568e-05	0.00013688		INIT DABCO	0.049
22559	0.0293	0.0191	0.009	30.0486	0.0328079	4.803e-05	0.00014096		INIT BuI *	0.11834
24415	0.0306	0.0169	0.009	31.0486	0.0333155	5.039e-05	0.00014502		INIT BuDABCOI	0
26271	0.0313	0.0169	0.009	32.0486	0.0338041	5.278e-05	0.00014906		INIT Bu2DABCOI2	0
28127	0.0319	0.0158	0.009	33.0486	0.0342746	5.519e-05	0.00015306		INIT BuDMSOI	0
29983	0.0334	0.0135	0.00788	34.0486	0.0347278	5.762e-05	0.00015705		INIT DMSO	1
31839	0.0345	0.0135	0.00788	35.0486	0.0351645	6.007e-05	0.00016101
33695	0.0351	0.0135	0.00788	36.0486	0.0355855	6.253e-05	0.00016496
35551	0.0358	0.0124	0.00788	37.0486	0.0359914	6.501e-05	0.00016888
37407	0.0364	0.0124	0.00788	38.0486	0.0363828	6.751e-05	0.00017278
37646	0.0388	0.0113	0.00788	39.0486	0.0367605	7.002e-05	0.00017666
39320	0.0381	0.0113	0.00675	40.0486	0.037125	7.254e-05	0.00018052
41176	0.0386	0.0101	0.00675	41.0486	0.0374768	7.508e-05	0.00018437
43032	0.0394	0.0101	0.00675	42.0486	0.0378165	7.763e-05	0.00018819
44888	0.0398	0.0101	0.00675	43.0486	0.0381446	8.019e-05	0.000192
46744	0.0403	0.0101	0.00675	44.0486	0.0384615	8.276e-05	0.00019579
48600	0.0407	0.0101	0.00675	45.0486	0.0387677	8.534e-05	0.00019957
50456	0.0411	0.009	0.00675	46.0486	0.0390637	8.793e-05	0.00020333
52312	0.042	0.009	0.00675	47.0486	0.0393498	9.054e-05	0.00020708
54168	0.0422	0.00788	0.00675	48.0486	0.0396265	9.315e-05	0.00021081
56024	0.0426	0.00788	0.00675	49.0486	0.039894	9.577e-05	0.00021453
57880	0.0431	0.00788	0.00563	50.0486	0.0401527	9.84e-05	0.00021823
59736	0.0433	0.00788	0.00563	51.0486	0.0404031	0.00010103	0.00022192
61592	0.0439	0.00788	0.00563	52.0486	0.0406453	0.00010368	0.0002256
63448	0.0443	0.00788	0.00563	53.0486	0.0408798	0.00010633	0.00022926
				54.0486	0.0411067	0.00010899	0.00023292
				55.0486	0.0413264	0.00011165	0.00023656
				56.0486	0.0415391	0.00011432	0.00024019
				57.0486	0.0417451	0.000117	0.00024381
				58.0486	0.0419446	0.00011968	0.00024741
				59.0486	0.0421379	0.00012237	0.00025101
				60.0486	0.0423252	0.00012507	0.0002546
				61.0486	0.0425066	0.00012776	0.00025818
				62.0486	0.0426824	0.00013047	0.00026174
				63.0486	0.0428529	0.00013317	0.0002653
				64.0486	0.0430181	0.00013589	0.00026885
				65.0486	0.0431782	0.0001386	0.00027239
				66.0486	0.0433334	0.00014132	0.00027592
				67.0486	0.043484	0.00014405	0.00027945
				68.0486	0.04363	0.00014678	0.00028296
				69.0486	0.0437715	0.00014951	0.00028647
				70.0486	0.0439088	0.00015224	0.00028997
				71.0486	0.044042	0.00015498	0.00029346
				72.0486	0.0441713	0.00015772	0.00029695
				73.0486	0.0442966	0.00016046	0.00030043
				74.0486	0.0444182	0.00016321	0.0003039
				75.0486	0.0445362	0.00016596	0.00030736
				76.0486	0.0446508	0.00016871	0.00031082
				77.0486	0.0447619	0.00017147	0.00031427
				78.0486	0.0448697	0.00017423	0.00031771
				79.0486	0.0449744	0.00017698	0.00032115
				80.0486	0.045076	0.00017975	0.00032459
				81.0486	0.0451747	0.00018251	0.00032801
				82.0486	0.0452704	0.00018528	0.00033143
				83.0486	0.0453634	0.00018804	0.00033485
				84.0486	0.0454536	0.00019081	0.00033826
				85.0486	0.0455412	0.00019359	0.00034167
				86.0486	0.0456263	0.00019636	0.00034507
				87.0486	0.0457089	0.00019913	0.00034846
				88.0486	0.0457891	0.00020191	0.00035185
				89.0486	0.045867	0.00020469	0.00035524
				90.0486	0.0459426	0.00020747	0.00035862
				91.0486	0.0460161	0.00021025	0.00036199
				92.0486	0.0460874	0.00021303	0.00036536
				93.0486	0.0461567	0.00021581	0.00036873
				94.0486	0.0462239	0.0002186	0.00037209
				95.0486	0.0462893	0.00022139	0.00037545
				96.0486	0.0463527	0.00022417	0.00037881
				97.0486	0.0464144	0.00022696	0.00038216
				98.0486	0.0464743	0.00022975	0.0003855
				99.0486	0.0465324	0.00023254	0.00038885
				100.049	0.0465889	0.00023533	0.00039219
				101.049	0.0466437	0.00023813	0.00039552
				102.049	0.046697	0.00024092	0.00039885
				103.049	0.0467487	0.00024371	0.00040218
				104.049	0.046799	0.00024651	0.00040551
				105.049	0.0468478	0.0002493	0.00040883
				106.049	0.0468952	0.0002521	0.00041215
				107.049	0.0469413	0.0002549	0.00041546
				108.049	0.046986	0.00025769	0.00041877
				109.049	0.0470295	0.00026049	0.00042208
				110.049	0.0470717	0.00026329	0.00042539
				111.049	0.0471127	0.00026609	0.00042869
				112.049	0.0471525	0.00026889	0.00043199
				113.049	0.0471912	0.00027169	0.00043529
				114.049	0.0472287	0.0002745	0.00043858
				115.049	0.0472652	0.0002773	0.00044187
				116.049	0.0473006	0.0002801	0.00044516
				117.049	0.047335	0.0002829	0.00044845
				118.049	0.0473683	0.00028571	0.00045173
				119.049	0.0474008	0.00028851	0.00045501
				120.049	0.0474323	0.00029131	0.00045829
				121.049	0.0474628	0.00029412	0.00046156
				122.049	0.0474925	0.00029692	0.00046484
				123.049	0.0475213	0.00029973	0.00046811
				124.049	0.0475493	0.00030253	0.00047138
				125.049	0.0475765	0.00030534	0.00047464
				126.049	0.0476028	0.00030815	0.00047791
				127.049	0.0476284	0.00031095	0.00048117
				128.049	0.0476533	0.00031376	0.00048443
				129.049	0.0476774	0.00031657	0.00048769
				130.049	0.0477008	0.00031937	0.00049094
				131.049	0.0477235	0.00032218	0.00049419
				132.049	0.0477455	0.00032499	0.00049745
				133.049	0.0477668	0.0003278	0.0005007
				134.049	0.0477876	0.0003306	0.00050394
				135.049	0.0478077	0.00033341	0.00050719
				136.049	0.0478272	0.00033622	0.00051043
				137.049	0.0478461	0.00033903	0.00051367
				138.049	0.0478645	0.00034184	0.00051691
				139.049	0.0478823	0.00034464	0.00052015
				140.049	0.0478995	0.00034745	0.00052339
				141.049	0.0479162	0.00035026	0.00052662
				142.049	0.0479324	0.00035307	0.00052985
				143.049	0.0479481	0.00035588	0.00053308
				144.049	0.0479634	0.00035869	0.00053631
				145.049	0.0479781	0.0003615	0.00053954
				146.049	0.0479924	0.00036431	0.00054277
				147.049	0.0480063	0.00036712	0.00054599
				148.049	0.0480197	0.00036992	0.00054921
				149.049	0.0480327	0.00037273	0.00055243
				150.049	0.0480452	0.00037554	0.00055565
				151.049	0.0480574	0.00037835	0.00055887
				152.049	0.0480692	0.00038116	0.00056209
				153.049	0.0480806	0.00038397	0.0005653
				154.049	0.0480916	0.00038678	0.00056851
				155.049	0.0481023	0.00038959	0.00057172
				156.049	0.0481126	0.0003924	0.00057493
				157.049	0.0481226	0.00039521	0.00057814
				158.049	0.0481322	0.00039801	0.00058135
				159.049	0.0481415	0.00040082	0.00058456
				160.049	0.0481505	0.00040363	0.00058776
				161.049	0.0481592	0.00040644	0.00059096
				162.049	0.0481676	0.00040925	0.00059417
				163.049	0.0481757	0.00041206	0.00059737
				164.049	0.0481836	0.00041487	0.00060056
				165.049	0.0481911	0.00041767	0.00060376
				166.049	0.0481984	0.00042048	0.00060696
				167.049	0.0482054	0.00042329	0.00061015
				168.049	0.0482122	0.0004261	0.00061335
				169.049	0.0482187	0.00042891	0.00061654
				170.049	0.048225	0.00043171	0.00061973
				171.049	0.048231	0.00043452	0.00062292
				172.049	0.0482368	0.00043733	0.00062611
				173.049	0.0482424	0.00044014	0.0006293
				174.049	0.0482477	0.00044294	0.00063248
				175.049	0.0482529	0.00044575	0.00063567
				176.049	0.0482578	0.00044856	0.00063885
				177.049	0.0482626	0.00045136	0.00064203
				178.049	0.0482672	0.00045417	0.00064521
				179.049	0.0482715	0.00045698	0.0006484
				180.049	0.0482757	0.00045978	0.00065157
				181.049	0.0482797	0.00046259	0.00065475
				182.049	0.0482835	0.0004654	0.00065793
				183.049	0.0482872	0.0004682	0.0006611
				184.049	0.0482906	0.00047101	0.00066428
				185.049	0.048294	0.00047381	0.00066745
				186.049	0.0482971	0.00047662	0.00067062
				187.049	0.0483001	0.00047942	0.0006738
				188.049	0.048303	0.00048223	0.00067697
				189.049	0.0483057	0.00048503	0.00068013
				190.049	0.0483083	0.00048784	0.0006833
				191.049	0.0483107	0.00049064	0.00068647
				192.049	0.048313	0.00049345	0.00068963
				193.049	0.0483152	0.00049625	0.0006928
				194.049	0.0483172	0.00049906	0.00069596
				195.049	0.0483191	0.00050186	0.00069913
				196.049	0.0483209	0.00050466	0.00070229
				197.049	0.0483226	0.00050747	0.00070545
				198.049	0.0483242	0.00051027	0.00070861
				199.049	0.0483256	0.00051307	0.00071177
				200.049	0.0483269	0.00051588	0.00071492
				201.049	0.0483282	0.00051868	0.00071808
				202.049	0.0483293	0.00052148	0.00072123
				203.049	0.0483303	0.00052428	0.00072439
				204.049	0.0483312	0.00052708	0.00072754
				205.049	0.0483321	0.00052989	0.00073069
				206.049	0.0483328	0.00053269	0.00073385
				207.049	0.0483335	0.00053549	0.000737
				208.049	0.048334	0.00053829	0.00074015
				209.049	0.0483345	0.00054109	0.00074329
				210.049	0.0483349	0.00054389	0.00074644
				211.049	0.0483352	0.00054669	0.00074959
				212.049	0.0483354	0.00054949	0.00075273
				213.049	0.0483356	0.00055229	0.00075588
				214.049	0.0483357	0.00055509	0.00075902
				215.049	0.0483357	0.00055789	0.00076216
				216.049	0.0483356	0.00056069	0.00076531
				217.049	0.0483354	0.00056349	0.00076845
				218.049	0.0483352	0.00056629	0.00077159
				219.049	0.048335	0.00056909	0.00077472
				220.049	0.0483346	0.00057189	0.00077786
				221.049	0.0483342	0.00057468	0.000781
				222.049	0.0483337	0.00057748	0.00078414
				223.049	0.0483332	0.00058028	0.00078727
				224.049	0.0483326	0.00058308	0.00079041
				225.049	0.048332	0.00058587	0.00079354
				226.049	0.0483313	0.00058867	0.00079667
				227.049	0.0483306	0.00059147	0.0007998
				228.049	0.0483298	0.00059426	0.00080293
				229.049	0.0483289	0.00059706	0.00080606
				230.049	0.048328	0.00059986	0.00080919
				231.049	0.0483271	0.00060265	0.00081232
				232.049	0.0483261	0.00060545	0.00081545
				233.049	0.048325	0.00060824	0.00081857
				234.049	0.0483239	0.00061104	0.0008217
				235.049	0.0483228	0.00061383	0.00082482
				236.049	0.0483216	0.00061663	0.00082794
				237.049	0.0483204	0.00061942	0.00083107
				238.049	0.0483192	0.00062221	0.00083419
				239.049	0.0483179	0.00062501	0.00083731
				240.049	0.0483165	0.0006278	0.00084043
				241.049	0.0483152	0.0006306	0.00084355
				242.049	0.0483138	0.00063339	0.00084667
				243.049	0.0483123	0.00063618	0.00084978
				244.049	0.0483108	0.00063897	0.0008529
				245.049	0.0483093	0.00064177	0.00085602
				246.049	0.0483078	0.00064456	0.00085913
				247.049	0.0483062	0.00064735	0.00086224
				248.049	0.0483046	0.00065014	0.00086536
				249.049	0.048303	0.00065293	0.00086847
				250.049	0.0483013	0.00065572	0.00087158
				251.049	0.0482996	0.00065851	0.00087469
				252.049	0.0482979	0.0006613	0.0008778
				253.049	0.0482962	0.00066409	0.00088091
				254.049	0.0482944	0.00066688	0.00088402
				255.049	0.0482926	0.00066967	0.00088712
				256.049	0.0482908	0.00067246	0.00089023
				257.049	0.0482889	0.00067525	0.00089333
				258.049	0.048287	0.00067804	0.00089644
				259.049	0.0482851	0.00068083	0.00089954
				260.049	0.0482832	0.00068362	0.00090264
				261.049	0.0482813	0.00068641	0.00090575
				262.049	0.0482793	0.00068919	0.00090885
				263.049	0.0482773	0.00069198	0.00091195
				264.049	0.0482753	0.00069477	0.00091505
				265.049	0.0482733	0.00069756	0.00091814
				266.049	0.0482713	0.00070034	0.00092124
				267.049	0.0482692	0.00070313	0.00092434
				268.049	0.0482671	0.00070592	0.00092743
				269.049	0.048265	0.0007087	0.00093053
				270.049	0.0482629	0.00071149	0.00093362
				271.049	0.0482608	0.00071427	0.00093672
				272.049	0.0482586	0.00071706	0.00093981
				273.049	0.0482565	0.00071984	0.0009429
				274.049	0.0482543	0.00072263	0.00094599
				275.049	0.0482521	0.00072541	0.00094908
				276.049	0.0482499	0.0007282	0.00095217
				277.049	0.0482477	0.00073098	0.00095526
				278.049	0.0482454	0.00073377	0.00095835
				279.049	0.0482432	0.00073655	0.00096143
				280.049	0.0482409	0.00073933	0.00096452
				281.049	0.0482386	0.00074211	0.0009676
				282.049	0.0482363	0.0007449	0.00097069
				283.049	0.048234	0.00074768	0.00097377
				284.049	0.0482317	0.00075046	0.00097685
				285.049	0.0482294	0.00075324	0.00097994
				286.049	0.0482271	0.00075603	0.00098302
				287.049	0.0482247	0.00075881	0.0009861
				288.049	0.0482223	0.00076159	0.00098918
				289.049	0.04822	0.00076437	0.00099225
				290.049	0.0482176	0.00076715	0.00099533
				291.049	0.0482152	0.00076993	0.00099841
				292.049	0.0482128	0.00077271	0.00100148
				293.049	0.0482104	0.00077549	0.00100456
				294.049	0.048208	0.00077827	0.00100763
				295.049	0.0482055	0.00078105	0.00101071
				296.049	0.0482031	0.00078383	0.00101378
				297.049	0.0482007	0.0007866	0.00101685
				298.049	0.0481982	0.00078938	0.00101992
				299.049	0.0481957	0.00079216	0.00102299
				300.049	0.0481933	0.00079494	0.00102606
				301.049	0.0481908	0.00079772	0.00102913
				302.049	0.0481883	0.00080049	0.0010322
				303.049	0.0481858	0.00080327	0.00103527
				304.049	0.0481833	0.00080605	0.00103833
				305.049	0.0481808	0.00080882	0.0010414
				306.049	0.0481783	0.0008116	0.00104446
				307.049	0.0481758	0.00081438	0.00104753
				308.049	0.0481733	0.00081715	0.00105059
				309.049	0.0481707	0.00081993	0.00105365
				310.049	0.0481682	0.0008227	0.00105671
				311.049	0.0481656	0.00082548	0.00105977
				312.049	0.0481631	0.00082825	0.00106283
				313.049	0.0481606	0.00083103	0.00106589
				314.049	0.048158	0.0008338	0.00106895
				315.049	0.0481554	0.00083657	0.00107201
				316.049	0.0481529	0.00083935	0.00107506
				317.049	0.0481503	0.00084212	0.00107812
				318.049	0.0481477	0.00084489	0.00108117
				319.049	0.0481451	0.00084767	0.00108423
				320.049	0.0481425	0.00085044	0.00108728
				321.049	0.0481399	0.00085321	0.00109033
				322.049	0.0481373	0.00085598	0.00109338
				323.049	0.0481347	0.00085876	0.00109643
				324.049	0.0481321	0.00086153	0.00109948
				325.049	0.0481295	0.0008643	0.00110253
				326.049	0.0481269	0.00086707	0.00110558
				327.049	0.0481243	0.00086984	0.00110863
				328.049	0.0481217	0.00087261	0.00111168
				329.049	0.048119	0.00087538	0.00111472
				330.049	0.0481164	0.00087815	0.00111777
				331.049	0.0481138	0.00088092	0.00112081
				332.049	0.0481111	0.00088369	0.00112386
				333.049	0.0481085	0.00088646	0.0011269
				334.049	0.0481059	0.00088923	0.00112994
				335.049	0.0481032	0.00089199	0.00113298
				336.049	0.0481006	0.00089476	0.00113602
				337.049	0.0480979	0.00089753	0.00113906
				338.049	0.0480953	0.0009003	0.0011421
				339.049	0.0480926	0.00090307	0.00114514
				340.049	0.04809	0.00090583	0.00114818
				341.049	0.0480873	0.0009086	0.00115121
				342.049	0.0480846	0.00091137	0.00115425
				343.049	0.048082	0.00091413	0.00115728
				344.049	0.0480793	0.0009169	0.00116032
				345.049	0.0480766	0.00091966	0.00116335
				346.049	0.048074	0.00092243	0.00116638
				347.049	0.0480713	0.00092519	0.00116941
				348.049	0.0480686	0.00092796	0.00117245
				349.049	0.048066	0.00093072	0.00117548
				350.049	0.0480633	0.00093349	0.0011785
				351.049	0.0480606	0.00093625	0.00118153
				352.049	0.0480579	0.00093902	0.00118456
				353.049	0.0480552	0.00094178	0.00118759
				354.049	0.0480525	0.00094454	0.00119061
				355.049	0.0480498	0.00094731	0.00119364
				356.049	0.0480471	0.00095007	0.00119666
				357.049	0.0480445	0.00095283	0.00119969
				358.049	0.0480418	0.00095559	0.00120271
				359.049	0.0480391	0.00095836	0.00120573
				360.049	0.0480364	0.00096112	0.00120875
				361.049	0.0480337	0.00096388	0.00121177
				362.049	0.048031	0.00096664	0.00121479
				363.049	0.0480283	0.0009694	0.00121781
				364.049	0.0480256	0.00097216	0.00122083
				365.049	0.0480229	0.00097492	0.00122385
				366.049	0.0480202	0.00097768	0.00122687
				367.049	0.0480175	0.00098044	0.00122988
				368.049	0.0480148	0.0009832	0.0012329
				369.049	0.0480121	0.00098596	0.00123591
				370.049	0.0480093	0.00098872	0.00123892
				371.049	0.0480066	0.00099148	0.00124194
				372.049	0.0480039	0.00099424	0.00124495
				373.049	0.0480012	0.000997	0.00124796
				374.049	0.0479985	0.00099975	0.00125097
				375.049	0.0479958	0.00100251	0.00125398
				376.049	0.0479931	0.00100527	0.00125699
				377.049	0.0479904	0.00100803	0.00126
				378.049	0.0479876	0.00101078	0.001263
				379.049	0.0479849	0.00101354	0.00126601
				380.049	0.0479822	0.0010163	0.00126902
				381.049	0.0479795	0.00101905	0.00127202
				382.049	0.0479768	0.00102181	0.00127502
				383.049	0.047974	0.00102456	0.00127803
				384.049	0.0479713	0.00102732	0.00128103
				385.049	0.0479686	0.00103007	0.00128403
				386.049	0.0479659	0.00103283	0.00128703
				387.049	0.0479632	0.00103558	0.00129003
				388.049	0.0479604	0.00103834	0.00129303
				389.049	0.0479577	0.00104109	0.00129603
				390.049	0.047955	0.00104384	0.00129903
				391.049	0.0479523	0.0010466	0.00130203
				392.049	0.0479496	0.00104935	0.00130502
				393.049	0.0479468	0.0010521	0.00130802
				394.049	0.0479441	0.00105486	0.00131101
				395.049	0.0479414	0.00105761	0.00131401
				396.049	0.0479386	0.00106036	0.001317
				397.049	0.0479359	0.00106311	0.00131999
				398.049	0.0479332	0.00106586	0.00132298
				399.049	0.0479305	0.00106861	0.00132597
				400.049	0.0479277	0.00107137	0.00132896
				401.049	0.047925	0.00107412	0.00133195
				402.049	0.0479223	0.00107687	0.00133494
				403.049	0.0479195	0.00107962	0.00133793
				404.049	0.0479168	0.00108237	0.00134091
				405.049	0.0479141	0.00108512	0.0013439
				406.049	0.0479114	0.00108787	0.00134689
				407.049	0.0479086	0.00109062	0.00134987
				408.049	0.0479059	0.00109336	0.00135285
				409.049	0.0479032	0.00109611	0.00135584
				410.049	0.0479004	0.00109886	0.00135882
				411.049	0.0478977	0.00110161	0.0013618
				412.049	0.047895	0.00110436	0.00136478
				413.049	0.0478923	0.0011071	0.00136776
				414.049	0.0478895	0.00110985	0.00137074
				415.049	0.0478868	0.0011126	0.00137372
				416.049	0.0478841	0.00111534	0.0013767
				417.049	0.0478813	0.00111809	0.00137967
				418.049	0.0478786	0.00112084	0.00138265
				419.049	0.0478759	0.00112358	0.00138562
				420.049	0.0478731	0.00112633	0.0013886
				421.049	0.0478704	0.00112907	0.00139157
				422.049	0.0478677	0.00113182	0.00139454
				423.049	0.0478649	0.00113456	0.00139752
				424.049	0.0478622	0.00113731	0.00140049
				425.049	0.0478595	0.00114005	0.00140346
				426.049	0.0478567	0.0011428	0.00140643
				427.049	0.047854	0.00114554	0.0014094
				428.049	0.0478513	0.00114828	0.00141236
				429.049	0.0478485	0.00115103	0.00141533
				430.049	0.0478458	0.00115377	0.0014183
				431.049	0.0478431	0.00115651	0.00142126
				432.049	0.0478403	0.00115925	0.00142423
				433.049	0.0478376	0.001162	0.00142719
				434.049	0.0478349	0.00116474	0.00143016
				435.049	0.0478322	0.00116748	0.00143312
				436.049	0.0478294	0.00117022	0.00143608
				437.049	0.0478267	0.00117296	0.00143904
				438.049	0.047824	0.0011757	0.001442
				439.049	0.0478212	0.00117844	0.00144496
				440.049	0.0478185	0.00118118	0.00144792
				441.049	0.0478158	0.00118392	0.00145088
				442.049	0.047813	0.00118666	0.00145384
				443.049	0.0478103	0.0011894	0.00145679
				444.049	0.0478076	0.00119214	0.00145975
				445.049	0.0478048	0.00119488	0.0014627
				446.049	0.0478021	0.00119762	0.00146566
				447.049	0.0477994	0.00120036	0.00146861
				448.049	0.0477966	0.0012031	0.00147156
				449.049	0.0477939	0.00120583	0.00147452
				450.049	0.0477912	0.00120857	0.00147747
				451.049	0.0477885	0.00121131	0.00148042
				452.049	0.0477857	0.00121405	0.00148337
				453.049	0.047783	0.00121678	0.00148631
				454.049	0.0477803	0.00121952	0.00148926
				455.049	0.0477775	0.00122226	0.00149221
				456.049	0.0477748	0.00122499	0.00149516
				457.049	0.0477721	0.00122773	0.0014981
				458.049	0.0477693	0.00123046	0.00150105
				459.049	0.0477666	0.0012332	0.00150399
				460.049	0.0477639	0.00123593	0.00150693
				461.049	0.0477612	0.00123867	0.00150988
				462.049	0.0477584	0.0012414	0.00151282
				463.049	0.0477557	0.00124414	0.00151576
				464.049	0.047753	0.00124687	0.0015187
				465.049	0.0477502	0.0012496	0.00152164
				466.049	0.0477475	0.00125234	0.00152458
				467.049	0.0477448	0.00125507	0.00152752
				468.049	0.047742	0.0012578	0.00153045
				469.049	0.0477393	0.00126054	0.00153339
				470.049	0.0477366	0.00126327	0.00153633
				471.049	0.0477339	0.001266	0.00153926
				472.049	0.0477311	0.00126873	0.0015422
				473.049	0.0477284	0.00127146	0.00154513
				474.049	0.0477257	0.00127419	0.00154806
				475.049	0.0477229	0.00127693	0.00155099
				476.049	0.0477202	0.00127966	0.00155392
				477.049	0.0477175	0.00128239	0.00155685
				478.049	0.0477148	0.00128512	0.00155978
				479.049	0.047712	0.00128785	0.00156271
				480.049	0.0477093	0.00129058	0.00156564
				481.049	0.0477066	0.00129331	0.00156857
				482.049	0.0477039	0.00129603	0.00157149
				483.049	0.0477011	0.00129876	0.00157442
				484.049	0.0476984	0.00130149	0.00157735
				485.049	0.0476957	0.00130422	0.00158027
				486.049	0.0476929	0.00130695	0.00158319
				487.049	0.0476902	0.00130968	0.00158612
				488.049	0.0476875	0.0013124	0.00158904
				489.049	0.0476848	0.00131513	0.00159196
				490.049	0.047682	0.00131786	0.00159488
				491.049	0.0476793	0.00132058	0.0015978
				492.049	0.0476766	0.00132331	0.00160072
				493.049	0.0476739	0.00132604	0.00160364
				494.049	0.0476712	0.00132876	0.00160655
				495.049	0.0476684	0.00133149	0.00160947
				496.049	0.0476657	0.00133421	0.00161239
				497.049	0.047663	0.00133694	0.0016153
				498.049	0.0476603	0.00133966	0.00161821
				499.049	0.0476575	0.00134239	0.00162113
				500.049	0.0476548	0.00134511	0.00162404
				501.049	0.0476521	0.00134784	0.00162695
				502.049	0.0476494	0.00135056	0.00162986
				503.049	0.0476466	0.00135328	0.00163277
				504.049	0.0476439	0.00135601	0.00163568
				505.049	0.0476412	0.00135873	0.00163859
				506.049	0.0476385	0.00136145	0.0016415
				507.049	0.0476358	0.00136417	0.00164441
				508.049	0.0476331	0.0013669	0.00164732
				509.049	0.0476303	0.00136962	0.00165022
				510.049	0.0476276	0.00137234	0.00165313
				511.049	0.0476249	0.00137506	0.00165603
				512.049	0.0476222	0.00137778	0.00165893
				513.049	0.0476195	0.0013805	0.00166184
				514.049	0.0476167	0.00138322	0.00166474
				515.049	0.047614	0.00138594	0.00166764
				516.049	0.0476113	0.00138866	0.00167054
				517.049	0.0476086	0.00139138	0.00167344
				518.049	0.0476058	0.0013941	0.00167634
				519.049	0.0476031	0.00139682	0.00167924
				520.049	0.0476004	0.00139954	0.00168214
				521.049	0.0475977	0.00140226	0.00168503
				522.049	0.047595	0.00140498	0.00168793
				523.049	0.0475923	0.0014077	0.00169082
				524.049	0.0475896	0.00141042	0.00169372
				525.049	0.0475868	0.00141313	0.00169661
				526.049	0.0475841	0.00141585	0.00169951
				527.049	0.0475814	0.00141857	0.0017024
				528.049	0.0475787	0.00142128	0.00170529
				529.049	0.047576	0.001424	0.00170818
				530.049	0.0475732	0.00142672	0.00171107
				531.049	0.0475705	0.00142943	0.00171396
				532.049	0.0475678	0.00143215	0.00171685
				533.049	0.0475651	0.00143487	0.00171973
				534.049	0.0475624	0.00143758	0.00172262
				535.049	0.0475597	0.0014403	0.00172551
				536.049	0.047557	0.00144301	0.00172839
				537.049	0.0475542	0.00144572	0.00173128
				538.049	0.0475515	0.00144844	0.00173416
				539.049	0.0475488	0.00145115	0.00173705
				540.049	0.0475461	0.00145387	0.00173993
				541.049	0.0475434	0.00145658	0.00174281
				542.049	0.0475407	0.00145929	0.00174569
				543.049	0.047538	0.00146201	0.00174857
				544.049	0.0475353	0.00146472	0.00175145
				545.049	0.0475325	0.00146743	0.00175433
				546.049	0.0475298	0.00147014	0.00175721
				547.049	0.0475271	0.00147286	0.00176008
				548.049	0.0475244	0.00147557	0.00176296
				549.049	0.0475217	0.00147828	0.00176584
				550.049	0.047519	0.00148099	0.00176871
				551.049	0.0475163	0.0014837	0.00177158
				552.049	0.0475136	0.00148641	0.00177446
				553.049	0.0475109	0.00148912	0.00177733
				554.049	0.0475081	0.00149183	0.0017802
				555.049	0.0475054	0.00149454	0.00178307
				556.049	0.0475027	0.00149725	0.00178594
				557.049	0.0475	0.00149996	0.00178881
				558.049	0.0474973	0.00150267	0.00179168
				559.049	0.0474946	0.00150538	0.00179455
				560.049	0.0474919	0.00150809	0.00179742
				561.049	0.0474892	0.00151079	0.00180028
				562.049	0.0474865	0.0015135	0.00180315
				563.049	0.0474838	0.00151621	0.00180601
				564.049	0.0474811	0.00151892	0.00180888
				565.049	0.0474784	0.00152162	0.00181174
				566.049	0.0474757	0.00152433	0.00181461
				567.049	0.0474729	0.00152704	0.00181747
				568.049	0.0474702	0.00152974	0.00182033
				569.049	0.0474675	0.00153245	0.00182319
				570.049	0.0474648	0.00153516	0.00182605
				571.049	0.0474621	0.00153786	0.00182891
				572.049	0.0474594	0.00154057	0.00183177
				573.049	0.0474567	0.00154327	0.00183462
				574.049	0.047454	0.00154598	0.00183748
				575.049	0.0474513	0.00154868	0.00184034
				576.049	0.0474486	0.00155139	0.00184319
				577.049	0.0474459	0.00155409	0.00184605
				578.049	0.0474432	0.00155679	0.0018489
				579.049	0.0474405	0.0015595	0.00185175
				580.049	0.0474378	0.0015622	0.00185461
				581.049	0.0474351	0.0015649	0.00185746
				582.049	0.0474324	0.00156761	0.00186031
				583.049	0.0474297	0.00157031	0.00186316
				584.049	0.047427	0.00157301	0.00186601
				585.049	0.0474243	0.00157571	0.00186886
				586.049	0.0474216	0.00157841	0.0018717
				587.049	0.0474189	0.00158112	0.00187455
				588.049	0.0474162	0.00158382	0.0018774
				589.049	0.0474135	0.00158652	0.00188024
				590.049	0.0474108	0.00158922	0.00188309
				591.049	0.0474081	0.00159192	0.00188593
				592.049	0.0474054	0.00159462	0.00188878
				593.049	0.0474027	0.00159732	0.00189162
				594.049	0.0474	0.00160002	0.00189446
				595.049	0.0473973	0.00160272	0.0018973
				596.049	0.0473946	0.00160542	0.00190014
				597.049	0.0473919	0.00160811	0.00190298
				598.049	0.0473892	0.00161081	0.00190582
				599.049	0.0473865	0.00161351	0.00190866
				600.049	0.0473838	0.00161621	0.0019115
				601.049	0.0473811	0.00161891	0.00191433
				602.049	0.0473784	0.0016216	0.00191717
				603.049	0.0473757	0.0016243	0.00192
				604.049	0.047373	0.001627	0.00192284
				605.049	0.0473703	0.0016297	0.00192567
				606.049	0.0473676	0.00163239	0.0019285
				607.049	0.0473649	0.00163509	0.00193134
				608.049	0.0473622	0.00163778	0.00193417
				609.049	0.0473595	0.00164048	0.001937
				610.049	0.0473568	0.00164318	0.00193983
				611.049	0.0473541	0.00164587	0.00194266
				612.049	0.0473514	0.00164857	0.00194549
				613.049	0.0473487	0.00165126	0.00194831
				614.049	0.047346	0.00165395	0.00195114
				615.049	0.0473433	0.00165665	0.00195397
				616.049	0.0473406	0.00165934	0.00195679
				617.049	0.047338	0.00166204	0.00195962
				618.049	0.0473353	0.00166473	0.00196244
				619.049	0.0473326	0.00166742	0.00196526
				620.049	0.0473299	0.00167011	0.00196809
				621.049	0.0473272	0.00167281	0.00197091
				622.049	0.0473245	0.0016755	0.00197373
				623.049	0.0473218	0.00167819	0.00197655
				624.049	0.0473191	0.00168088	0.00197937
				625.049	0.0473164	0.00168357	0.00198219
				626.049	0.0473137	0.00168627	0.00198501
				627.049	0.047311	0.00168896	0.00198782
				628.049	0.0473083	0.00169165	0.00199064
				629.049	0.0473057	0.00169434	0.00199346
				630.049	0.047303	0.00169703	0.00199627
				631.049	0.0473003	0.00169972	0.00199909
				632.049	0.0472976	0.00170241	0.0020019
				633.049	0.0472949	0.0017051	0.00200471
				634.049	0.0472922	0.00170779	0.00200752
				635.049	0.0472895	0.00171048	0.00201034
				636.049	0.0472868	0.00171316	0.00201315
				637.049	0.0472841	0.00171585	0.00201596
				638.049	0.0472815	0.00171854	0.00201877
				639.049	0.0472788	0.00172123	0.00202157
				640.049	0.0472761	0.00172392	0.00202438
				641.049	0.0472734	0.0017266	0.00202719
				642.049	0.0472707	0.00172929	0.00203
				643.049	0.047268	0.00173198	0.0020328
				644.049	0.0472653	0.00173466	0.00203561
				645.049	0.0472627	0.00173735	0.00203841
				646.049	0.04726	0.00174004	0.00204121
				647.049	0.0472573	0.00174272	0.00204402
				648.049	0.0472546	0.00174541	0.00204682
				649.049	0.0472519	0.00174809	0.00204962
				650.049	0.0472492	0.00175078	0.00205242
				651.049	0.0472465	0.00175346	0.00205522
				652.049	0.0472438	0.00175615	0.00205802
				653.049	0.0472412	0.00175883	0.00206082
				654.049	0.0472385	0.00176151	0.00206361
				655.049	0.0472358	0.0017642	0.00206641
				656.049	0.0472331	0.00176688	0.00206921
				657.049	0.0472304	0.00176956	0.002072
				658.049	0.0472277	0.00177225	0.0020748
				659.049	0.0472251	0.00177493	0.00207759
				660.049	0.0472224	0.00177761	0.00208038
				661.049	0.0472197	0.00178029	0.00208318
				662.049	0.047217	0.00178298	0.00208597
				663.049	0.0472143	0.00178566	0.00208876
				664.049	0.0472117	0.00178834	0.00209155
				665.049	0.047209	0.00179102	0.00209434
				666.049	0.0472063	0.0017937	0.00209713
				667.049	0.0472036	0.00179638	0.00209991
				668.049	0.0472009	0.00179906	0.0021027
				669.049	0.0471983	0.00180174	0.00210549
				670.049	0.0471956	0.00180442	0.00210827
				671.049	0.0471929	0.0018071	0.00211106
				672.049	0.0471902	0.00180978	0.00211384
				673.049	0.0471875	0.00181246	0.00211663
				674.049	0.0471849	0.00181514	0.00211941
				675.049	0.0471822	0.00181782	0.00212219
				676.049	0.0471795	0.0018205	0.00212497
				677.049	0.0471768	0.00182317	0.00212775
				678.049	0.0471741	0.00182585	0.00213053
				679.049	0.0471715	0.00182853	0.00213331
				680.049	0.0471688	0.00183121	0.00213609
				681.049	0.0471661	0.00183388	0.00213887
				682.049	0.0471634	0.00183656	0.00214164
				683.049	0.0471608	0.00183924	0.00214442
				684.049	0.0471581	0.00184191	0.0021472
				685.049	0.0471554	0.00184459	0.00214997
				686.049	0.0471527	0.00184726	0.00215274
				687.049	0.0471501	0.00184994	0.00215552
				688.049	0.0471474	0.00185261	0.00215829
				689.049	0.0471447	0.00185529	0.00216106
				690.049	0.047142	0.00185796	0.00216383
				691.049	0.0471394	0.00186064	0.0021666
				692.049	0.0471367	0.00186331	0.00216937
				693.049	0.047134	0.00186599	0.00217214
				694.049	0.0471313	0.00186866	0.00217491
				695.049	0.0471287	0.00187133	0.00217768
				696.049	0.047126	0.00187401	0.00218044
				697.049	0.0471233	0.00187668	0.00218321
				698.049	0.0471207	0.00187935	0.00218598
				699.049	0.047118	0.00188202	0.00218874
				700.049	0.0471153	0.0018847	0.0021915
				701.049	0.0471126	0.00188737	0.00219427
				702.049	0.04711	0.00189004	0.00219703
				703.049	0.0471073	0.00189271	0.00219979
				704.049	0.0471046	0.00189538	0.00220255
				705.049	0.0471019	0.00189805	0.00220531
				706.049	0.0470993	0.00190072	0.00220807
				707.049	0.0470966	0.00190339	0.00221083
				708.049	0.0470939	0.00190606	0.00221359
				709.049	0.0470913	0.00190873	0.00221635
				710.049	0.0470886	0.0019114	0.0022191
				711.049	0.0470859	0.00191407	0.00222186
				712.049	0.0470833	0.00191674	0.00222461
				713.049	0.0470806	0.00191941	0.00222737
				714.049	0.0470779	0.00192208	0.00223012
				715.049	0.0470752	0.00192475	0.00223287
				716.049	0.0470726	0.00192741	0.00223563
				717.049	0.0470699	0.00193008	0.00223838
				718.049	0.0470672	0.00193275	0.00224113
				719.049	0.0470646	0.00193542	0.00224388
				720.049	0.0470619	0.00193808	0.00224663
				721.049	0.0470592	0.00194075	0.00224938
				722.049	0.0470566	0.00194342	0.00225212
				723.049	0.0470539	0.00194608	0.00225487
				724.049	0.0470513	0.00194875	0.00225762
				725.049	0.0470486	0.00195141	0.00226036
				726.049	0.0470459	0.00195408	0.00226311
				727.049	0.0470433	0.00195675	0.00226585
				728.049	0.0470406	0.00195941	0.0022686
				729.049	0.0470379	0.00196207	0.00227134
				730.049	0.0470353	0.00196474	0.00227408
				731.049	0.0470326	0.0019674	0.00227682
				732.049	0.0470299	0.00197007	0.00227956
				733.049	0.0470273	0.00197273	0.0022823
				734.049	0.0470246	0.00197539	0.00228504
				735.049	0.0470219	0.00197806	0.00228778
				736.049	0.0470193	0.00198072	0.00229052
				737.049	0.0470166	0.00198338	0.00229325
				738.049	0.0470139	0.00198605	0.00229599
				739.049	0.0470113	0.00198871	0.00229873
				740.049	0.0470086	0.00199137	0.00230146
				741.049	0.047006	0.00199403	0.0023042
				742.049	0.0470033	0.00199669	0.00230693
				743.049	0.0470006	0.00199935	0.00230966
				744.049	0.046998	0.00200201	0.00231239
				745.049	0.0469953	0.00200467	0.00231512
				746.049	0.0469927	0.00200733	0.00231786
				747.049	0.04699	0.00200999	0.00232059
				748.049	0.0469873	0.00201265	0.00232331
				749.049	0.0469847	0.00201531	0.00232604
				750.049	0.046982	0.00201797	0.00232877
				751.049	0.0469794	0.00202063	0.0023315
				752.049	0.0469767	0.00202329	0.00233422
				753.049	0.0469741	0.00202595	0.00233695
				754.049	0.0469714	0.00202861	0.00233967
				755.049	0.0469687	0.00203127	0.0023424
				756.049	0.0469661	0.00203392	0.00234512
				757.049	0.0469634	0.00203658	0.00234784
				758.049	0.0469608	0.00203924	0.00235057
				759.049	0.0469581	0.00204189	0.00235329
				760.049	0.0469555	0.00204455	0.00235601
				761.049	0.0469528	0.00204721	0.00235873
				762.049	0.0469501	0.00204986	0.00236145
				763.049	0.0469475	0.00205252	0.00236416
				764.049	0.0469448	0.00205518	0.00236688
				765.049	0.0469422	0.00205783	0.0023696
				766.049	0.0469395	0.00206049	0.00237231
				767.049	0.0469369	0.00206314	0.00237503
				768.049	0.0469342	0.0020658	0.00237774
				769.049	0.0469316	0.00206845	0.00238046
				770.049	0.0469289	0.0020711	0.00238317
				771.049	0.0469262	0.00207376	0.00238588
				772.049	0.0469236	0.00207641	0.0023886
				773.049	0.0469209	0.00207907	0.00239131
				774.049	0.0469183	0.00208172	0.00239402
				775.049	0.0469156	0.00208437	0.00239673
				776.049	0.046913	0.00208702	0.00239944
				777.049	0.0469103	0.00208968	0.00240215
				778.049	0.0469077	0.00209233	0.00240485
				779.049	0.046905	0.00209498	0.00240756
				780.049	0.0469024	0.00209763	0.00241027
				781.049	0.0468997	0.00210028	0.00241297
				782.049	0.0468971	0.00210293	0.00241568
				783.049	0.0468944	0.00210558	0.00241838
				784.049	0.0468918	0.00210824	0.00242108
				785.049	0.0468891	0.00211089	0.00242379
				786.049	0.0468865	0.00211354	0.00242649
				787.049	0.0468838	0.00211619	0.00242919
				788.049	0.0468812	0.00211884	0.00243189
				789.049	0.0468785	0.00212148	0.00243459
				790.049	0.0468759	0.00212413	0.00243729
				791.049	0.0468732	0.00212678	0.00243999
				792.049	0.0468706	0.00212943	0.00244268
				793.049	0.0468679	0.00213208	0.00244538
				794.049	0.0468653	0.00213473	0.00244808
				795.049	0.0468626	0.00213738	0.00245077
				796.049	0.04686	0.00214002	0.00245347
				797.049	0.0468573	0.00214267	0.00245616
				798.049	0.0468547	0.00214532	0.00245885
				799.049	0.046852	0.00214796	0.00246155
				800.049	0.0468494	0.00215061	0.00246424
				801.049	0.0468467	0.00215326	0.00246693
				802.049	0.0468441	0.0021559	0.00246962
				803.049	0.0468414	0.00215855	0.00247231
				804.049	0.0468388	0.00216119	0.002475
				805.049	0.0468362	0.00216384	0.00247769
				806.049	0.0468335	0.00216648	0.00248038
				807.049	0.0468309	0.00216913	0.00248306
				808.049	0.0468282	0.00217177	0.00248575
				809.049	0.0468256	0.00217442	0.00248843
				810.049	0.0468229	0.00217706	0.00249112
				811.049	0.0468203	0.00217971	0.0024938
				812.049	0.0468177	0.00218235	0.00249649
				813.049	0.046815	0.00218499	0.00249917
				814.049	0.0468124	0.00218763	0.00250185
				815.049	0.0468097	0.00219028	0.00250453
				816.049	0.0468071	0.00219292	0.00250721
				817.049	0.0468044	0.00219556	0.00250989
				818.049	0.0468018	0.0021982	0.00251257
				819.049	0.0467991	0.00220085	0.00251525
				820.049	0.0467965	0.00220349	0.00251793
				821.049	0.0467939	0.00220613	0.00252061
				822.049	0.0467912	0.00220877	0.00252328
				823.049	0.0467886	0.00221141	0.00252596
				824.049	0.0467859	0.00221405	0.00252863
				825.049	0.0467833	0.00221669	0.00253131
				826.049	0.0467807	0.00221933	0.00253398
				827.049	0.046778	0.00222197	0.00253665
				828.049	0.0467754	0.00222461	0.00253933
				829.049	0.0467728	0.00222725	0.002542
				830.049	0.0467701	0.00222989	0.00254467
				831.049	0.0467675	0.00223253	0.00254734
				832.049	0.0467648	0.00223516	0.00255001
				833.049	0.0467622	0.0022378	0.00255267
				834.049	0.0467596	0.00224044	0.00255534
				835.049	0.0467569	0.00224308	0.00255801
				836.049	0.0467543	0.00224572	0.00256068
				837.049	0.0467516	0.00224835	0.00256334
				838.049	0.046749	0.00225099	0.00256601
				839.049	0.0467464	0.00225363	0.00256867
				840.049	0.0467437	0.00225626	0.00257134
				841.049	0.0467411	0.0022589	0.002574
				842.049	0.0467385	0.00226154	0.00257666
				843.049	0.0467358	0.00226417	0.00257932
				844.049	0.0467332	0.00226681	0.00258198
				845.049	0.0467306	0.00226944	0.00258464
				846.049	0.0467279	0.00227208	0.0025873
				847.049	0.0467253	0.00227471	0.00258996
				848.049	0.0467226	0.00227735	0.00259262
				849.049	0.04672	0.00227998	0.00259528
				850.049	0.0467174	0.00228261	0.00259793
				851.049	0.0467147	0.00228525	0.00260059
				852.049	0.0467121	0.00228788	0.00260324
				853.049	0.0467095	0.00229051	0.0026059
				854.049	0.0467069	0.00229315	0.00260855
				855.049	0.0467042	0.00229578	0.00261121
				856.049	0.0467016	0.00229841	0.00261386
				857.049	0.046699	0.00230104	0.00261651
				858.049	0.0466963	0.00230368	0.00261916
				859.049	0.0466937	0.00230631	0.00262181
				860.049	0.0466911	0.00230894	0.00262446
				861.049	0.0466884	0.00231157	0.00262711
				862.049	0.0466858	0.0023142	0.00262976
				863.049	0.0466832	0.00231683	0.0026324
				864.049	0.0466805	0.00231946	0.00263505
				865.049	0.0466779	0.00232209	0.0026377
				866.049	0.0466753	0.00232472	0.00264034
				867.049	0.0466727	0.00232735	0.00264299
				868.049	0.04667	0.00232998	0.00264563
				869.049	0.0466674	0.00233261	0.00264827
				870.049	0.0466648	0.00233524	0.00265092
				871.049	0.0466621	0.00233787	0.00265356
				872.049	0.0466595	0.00234049	0.0026562
				873.049	0.0466569	0.00234312	0.00265884
				874.049	0.0466543	0.00234575	0.00266148
				875.049	0.0466516	0.00234838	0.00266412
				876.049	0.046649	0.00235101	0.00266676
				877.049	0.0466464	0.00235363	0.0026694
				878.049	0.0466437	0.00235626	0.00267203
				879.049	0.0466411	0.00235889	0.00267467
				880.049	0.0466385	0.00236151	0.0026773
				881.049	0.0466359	0.00236414	0.00267994
				882.049	0.0466332	0.00236676	0.00268257
				883.049	0.0466306	0.00236939	0.00268521
				884.049	0.046628	0.00237202	0.00268784
				885.049	0.0466254	0.00237464	0.00269047
				886.049	0.0466227	0.00237727	0.0026931
				887.049	0.0466201	0.00237989	0.00269573
				888.049	0.0466175	0.00238251	0.00269836
				889.049	0.0466149	0.00238514	0.00270099
				890.049	0.0466122	0.00238776	0.00270362
				891.049	0.0466096	0.00239039	0.00270625
				892.049	0.046607	0.00239301	0.00270888
				893.049	0.0466044	0.00239563	0.0027115
				894.049	0.0466017	0.00239825	0.00271413
				895.049	0.0465991	0.00240088	0.00271676
				896.049	0.0465965	0.0024035	0.00271938
				897.049	0.0465939	0.00240612	0.002722
				898.049	0.0465913	0.00240874	0.00272463
				899.049	0.0465886	0.00241136	0.00272725
				900.049	0.046586	0.00241399	0.00272987
				901.049	0.0465834	0.00241661	0.00273249
				902.049	0.0465808	0.00241923	0.00273511
				903.049	0.0465781	0.00242185	0.00273773
				904.049	0.0465755	0.00242447	0.00274035
				905.049	0.0465729	0.00242709	0.00274297
				906.049	0.0465703	0.00242971	0.00274559
				907.049	0.0465677	0.00243233	0.0027482
				908.049	0.046565	0.00243495	0.00275082
				909.049	0.0465624	0.00243757	0.00275343
				910.049	0.0465598	0.00244019	0.00275605
				911.049	0.0465572	0.0024428	0.00275866
				912.049	0.0465546	0.00244542	0.00276128
				913.049	0.046552	0.00244804	0.00276389
				914.049	0.0465493	0.00245066	0.0027665
				915.049	0.0465467	0.00245328	0.00276911
				916.049	0.0465441	0.00245589	0.00277172
				917.049	0.0465415	0.00245851	0.00277433
				918.049	0.0465389	0.00246113	0.00277694
				919.049	0.0465363	0.00246374	0.00277955
				920.049	0.0465336	0.00246636	0.00278216
				921.049	0.046531	0.00246898	0.00278477
				922.049	0.0465284	0.00247159	0.00278737
				923.049	0.0465258	0.00247421	0.00278998
				924.049	0.0465232	0.00247682	0.00279258
				925.049	0.0465206	0.00247944	0.00279519
				926.049	0.046518	0.00248205	0.00279779
				927.049	0.0465153	0.00248467	0.00280039
				928.049	0.0465127	0.00248728	0.002803
				929.049	0.0465101	0.0024899	0.0028056
				930.049	0.0465075	0.00249251	0.0028082
				931.049	0.0465049	0.00249512	0.0028108
				932.049	0.0465023	0.00249774	0.0028134
				933.049	0.0464996	0.00250035	0.002816
				934.049	0.046497	0.00250296	0.0028186
				935.049	0.0464944	0.00250558	0.00282119
				936.049	0.0464918	0.00250819	0.00282379
				937.049	0.0464892	0.0025108	0.00282639
				938.049	0.0464866	0.00251341	0.00282898
				939.049	0.046484	0.00251602	0.00283158
				940.049	0.0464814	0.00251863	0.00283417
				941.049	0.0464787	0.00252125	0.00283676
				942.049	0.0464761	0.00252386	0.00283936
				943.049	0.0464735	0.00252647	0.00284195
				944.049	0.0464709	0.00252908	0.00284454
				945.049	0.0464683	0.00253169	0.00284713
				946.049	0.0464657	0.0025343	0.00284972
				947.049	0.0464631	0.00253691	0.00285231
				948.049	0.0464605	0.00253952	0.0028549
				949.049	0.0464579	0.00254213	0.00285749
				950.049	0.0464553	0.00254473	0.00286007
				951.049	0.0464527	0.00254734	0.00286266
				952.049	0.04645	0.00254995	0.00286525
				953.049	0.0464474	0.00255256	0.00286783
				954.049	0.0464448	0.00255517	0.00287042
				955.049	0.0464422	0.00255777	0.002873
				956.049	0.0464396	0.00256038	0.00287558
				957.049	0.046437	0.00256299	0.00287817
				958.049	0.0464344	0.0025656	0.00288075
				959.049	0.0464318	0.0025682	0.00288333
				960.049	0.0464292	0.00257081	0.00288591
				961.049	0.0464266	0.00257342	0.00288849
				962.049	0.046424	0.00257602	0.00289107
				963.049	0.0464214	0.00257863	0.00289365
				964.049	0.0464188	0.00258123	0.00289622
				965.049	0.0464162	0.00258384	0.0028988
				966.049	0.0464136	0.00258644	0.00290138
				967.049	0.0464109	0.00258905	0.00290395
				968.049	0.0464084	0.00259165	0.00290653
				969.049	0.0464057	0.00259426	0.0029091
				970.049	0.0464031	0.00259686	0.00291167
				971.049	0.0464005	0.00259946	0.00291425
				972.049	0.0463979	0.00260207	0.00291682
				973.049	0.0463953	0.00260467	0.00291939
				974.049	0.0463927	0.00260727	0.00292196
				975.049	0.0463901	0.00260987	0.00292453
				976.049	0.0463875	0.00261248	0.0029271
				977.049	0.0463849	0.00261508	0.00292967
				978.049	0.0463823	0.00261768	0.00293224
				979.049	0.0463797	0.00262028	0.0029348
				980.049	0.0463771	0.00262288	0.00293737
				981.049	0.0463745	0.00262549	0.00293994
				982.049	0.0463719	0.00262809	0.0029425
				983.049	0.0463693	0.00263069	0.00294507
				984.049	0.0463667	0.00263329	0.00294763
				985.049	0.0463641	0.00263589	0.00295019
				986.049	0.0463615	0.00263849	0.00295276
				987.049	0.0463589	0.00264109	0.00295532
				988.049	0.0463563	0.00264369	0.00295788
				989.049	0.0463537	0.00264629	0.00296044
				990.049	0.0463511	0.00264889	0.002963
				991.049	0.0463485	0.00265148	0.00296556
				992.049	0.0463459	0.00265408	0.00296812
				993.049	0.0463433	0.00265668	0.00297068
				994.049	0.0463407	0.00265928	0.00297323
				995.049	0.0463381	0.00266188	0.00297579
				996.049	0.0463355	0.00266447	0.00297835
				997.049	0.0463329	0.00266707	0.0029809
				998.049	0.0463303	0.00266967	0.00298346
				999.049	0.0463277	0.00267226	0.00298601
				1000.05	0.0463251	0.00267486	0.00298856
				1001.05	0.0463225	0.00267746	0.00299112
				1002.05	0.0463199	0.00268005	0.00299367
				1003.05	0.0463174	0.00268265	0.00299622
				1004.05	0.0463148	0.00268524	0.00299877
				1005.05	0.0463122	0.00268784	0.00300132
				1006.05	0.0463096	0.00269043	0.00300387
				1007.05	0.046307	0.00269303	0.00300642
				1008.05	0.0463044	0.00269562	0.00300896
				1009.05	0.0463018	0.00269822	0.00301151
				1010.05	0.0462992	0.00270081	0.00301406
				1011.05	0.0462966	0.00270341	0.0030166
				1012.05	0.046294	0.002706	0.00301915
				1013.05	0.0462914	0.00270859	0.00302169
				1014.05	0.0462888	0.00271119	0.00302423
				1015.05	0.0462862	0.00271378	0.00302678
				1016.05	0.0462836	0.00271637	0.00302932
				1017.05	0.046281	0.00271896	0.00303186
				1018.05	0.0462784	0.00272156	0.0030344
				1019.05	0.0462759	0.00272415	0.00303694
				1020.05	0.0462733	0.00272674	0.00303948
				1021.05	0.0462707	0.00272933	0.00304202
				1022.05	0.0462681	0.00273192	0.00304456
				1023.05	0.0462655	0.00273451	0.0030471
				1024.05	0.0462629	0.0027371	0.00304963
				1025.05	0.0462603	0.00273969	0.00305217
				1026.05	0.0462577	0.00274228	0.00305471
				1027.05	0.0462551	0.00274487	0.00305724
				1028.05	0.0462525	0.00274746	0.00305977
				1029.05	0.0462499	0.00275005	0.00306231
				1030.05	0.0462474	0.00275264	0.00306484
				1031.05	0.0462448	0.00275523	0.00306737
				1032.05	0.0462422	0.00275782	0.0030699
				1033.05	0.0462396	0.00276041	0.00307244
				1034.05	0.046237	0.00276299	0.00307497
				1035.05	0.0462344	0.00276558	0.0030775
				1036.05	0.0462318	0.00276817	0.00308002
				1037.05	0.0462292	0.00277076	0.00308255
				1038.05	0.0462267	0.00277334	0.00308508
				1039.05	0.0462241	0.00277593	0.00308761
				1040.05	0.0462215	0.00277852	0.00309013
				1041.05	0.0462189	0.0027811	0.00309266
				1042.05	0.0462163	0.00278369	0.00309518
				1043.05	0.0462137	0.00278628	0.00309771
				1044.05	0.0462111	0.00278886	0.00310023
				1045.05	0.0462086	0.00279145	0.00310275
				1046.05	0.046206	0.00279403	0.00310528
				1047.05	0.0462034	0.00279662	0.0031078
				1048.05	0.0462008	0.0027992	0.00311032
				1049.05	0.0461982	0.00280179	0.00311284
				1050.05	0.0461956	0.00280437	0.00311536
				1051.05	0.046193	0.00280696	0.00311788
				1052.05	0.0461905	0.00280954	0.00312039
				1053.05	0.0461879	0.00281212	0.00312291
				1054.05	0.0461853	0.00281471	0.00312543
				1055.05	0.0461827	0.00281729	0.00312794
				1056.05	0.0461801	0.00281987	0.00313046
				1057.05	0.0461775	0.00282245	0.00313297
				1058.05	0.046175	0.00282504	0.00313549
				1059.05	0.0461724	0.00282762	0.003138
				1060.05	0.0461698	0.0028302	0.00314051
				1061.05	0.0461672	0.00283278	0.00314303
				1062.05	0.0461646	0.00283536	0.00314554
				1063.05	0.0461621	0.00283794	0.00314805
				1064.05	0.0461595	0.00284052	0.00315056
				1065.05	0.0461569	0.0028431	0.00315307
				1066.05	0.0461543	0.00284568	0.00315558
				1067.05	0.0461517	0.00284827	0.00315808
				1068.05	0.0461492	0.00285084	0.00316059
				1069.05	0.0461466	0.00285342	0.0031631
				1070.05	0.046144	0.002856	0.0031656
				1071.05	0.0461414	0.00285858	0.00316811
				1072.05	0.0461388	0.00286116	0.00317061
				1073.05	0.0461363	0.00286374	0.00317312
				1074.05	0.0461337	0.00286632	0.00317562
				1075.05	0.0461311	0.0028689	0.00317812
				1076.05	0.0461285	0.00287147	0.00318063
				1077.05	0.0461259	0.00287405	0.00318313
				1078.05	0.0461234	0.00287663	0.00318563
				1079.05	0.0461208	0.00287921	0.00318813
				1080.05	0.0461182	0.00288178	0.00319063
				1081.05	0.0461156	0.00288436	0.00319313
				1082.05	0.0461131	0.00288694	0.00319563
				1083.05	0.0461105	0.00288951	0.00319812
				1084.05	0.0461079	0.00289209	0.00320062
				1085.05	0.0461053	0.00289466	0.00320312
				1086.05	0.0461028	0.00289724	0.00320561
				1087.05	0.0461002	0.00289981	0.00320811
				1088.05	0.0460976	0.00290239	0.0032106
				1089.05	0.046095	0.00290496	0.00321309
				1090.05	0.0460925	0.00290754	0.00321559
				1091.05	0.0460899	0.00291011	0.00321808
				1092.05	0.0460873	0.00291269	0.00322057
				1093.05	0.0460847	0.00291526	0.00322306
				1094.05	0.0460822	0.00291783	0.00322555
				1095.05	0.0460796	0.00292041	0.00322804
				1096.05	0.046077	0.00292298	0.00323053
				1097.05	0.0460745	0.00292555	0.00323302
				1098.05	0.0460719	0.00292813	0.0032355
				1099.05	0.0460693	0.0029307	0.00323799
				1100.05	0.0460667	0.00293327	0.00324048
				1101.05	0.0460642	0.00293584	0.00324296
				1102.05	0.0460616	0.00293841	0.00324545
				1103.05	0.046059	0.00294098	0.00324793
				1104.05	0.0460564	0.00294355	0.00325041
				1105.05	0.0460539	0.00294613	0.0032529
				1106.05	0.0460513	0.0029487	0.00325538
				1107.05	0.0460487	0.00295127	0.00325786
				1108.05	0.0460462	0.00295384	0.00326034
				1109.05	0.0460436	0.00295641	0.00326282
				1110.05	0.046041	0.00295898	0.0032653
				1111.05	0.0460385	0.00296155	0.00326778
				1112.05	0.0460359	0.00296411	0.00327026
				1113.05	0.0460333	0.00296668	0.00327274
				1114.05	0.0460308	0.00296925	0.00327521
				1115.05	0.0460282	0.00297182	0.00327769
				1116.05	0.0460256	0.00297439	0.00328016
				1117.05	0.046023	0.00297696	0.00328264
				1118.05	0.0460205	0.00297952	0.00328511
				1119.05	0.0460179	0.00298209	0.00328759
				1120.05	0.0460153	0.00298466	0.00329006
				1121.05	0.0460128	0.00298722	0.00329253
				1122.05	0.0460102	0.00298979	0.003295
				1123.05	0.0460076	0.00299236	0.00329747
				1124.05	0.0460051	0.00299492	0.00329994
				1125.05	0.0460025	0.00299749	0.00330241
				1126.05	0.0459999	0.00300006	0.00330488
				1127.05	0.0459974	0.00300262	0.00330735
				1128.05	0.0459948	0.00300519	0.00330982
				1129.05	0.0459922	0.00300775	0.00331229
				1130.05	0.0459897	0.00301032	0.00331475
				1131.05	0.0459871	0.00301288	0.00331722
				1132.05	0.0459846	0.00301544	0.00331968
				1133.05	0.045982	0.00301801	0.00332215
				1134.05	0.0459794	0.00302057	0.00332461
				1135.05	0.0459769	0.00302314	0.00332707
				1136.05	0.0459743	0.0030257	0.00332954
				1137.05	0.0459717	0.00302826	0.003332
				1138.05	0.0459692	0.00303082	0.00333446
				1139.05	0.0459666	0.00303339	0.00333692
				1140.05	0.045964	0.00303595	0.00333938
				1141.05	0.0459615	0.00303851	0.00334184
				1142.05	0.0459589	0.00304107	0.0033443
				1143.05	0.0459564	0.00304364	0.00334676
				1144.05	0.0459538	0.0030462	0.00334921
				1145.05	0.0459512	0.00304876	0.00335167
				1146.05	0.0459487	0.00305132	0.00335412
				1147.05	0.0459461	0.00305388	0.00335658
				1148.05	0.0459436	0.00305644	0.00335903
				1149.05	0.045941	0.003059	0.00336149
				1150.05	0.0459384	0.00306156	0.00336394
				1151.05	0.0459359	0.00306412	0.00336639
				1152.05	0.0459333	0.00306668	0.00336885
				1153.05	0.0459308	0.00306924	0.0033713
				1154.05	0.0459282	0.0030718	0.00337375
				1155.05	0.0459256	0.00307435	0.0033762
				1156.05	0.0459231	0.00307691	0.00337865
				1157.05	0.0459205	0.00307947	0.0033811
				1158.05	0.045918	0.00308203	0.00338354
				1159.05	0.0459154	0.00308459	0.00338599
				1160.05	0.0459129	0.00308714	0.00338844
				1161.05	0.0459103	0.0030897	0.00339088
				1162.05	0.0459077	0.00309226	0.00339333
				1163.05	0.0459052	0.00309482	0.00339577
				1164.05	0.0459026	0.00309737	0.00339822
				1165.05	0.0459001	0.00309993	0.00340066
				1166.05	0.0458975	0.00310248	0.0034031
				1167.05	0.045895	0.00310504	0.00340555
				1168.05	0.0458924	0.0031076	0.00340799
				1169.05	0.0458899	0.00311015	0.00341043
				1170.05	0.0458873	0.00311271	0.00341287
				1171.05	0.0458847	0.00311526	0.00341531
				1172.05	0.0458822	0.00311782	0.00341775
				1173.05	0.0458796	0.00312037	0.00342018
				1174.05	0.0458771	0.00312292	0.00342262
				1175.05	0.0458745	0.00312548	0.00342506
				1176.05	0.045872	0.00312803	0.0034275
				1177.05	0.0458694	0.00313058	0.00342993
				1178.05	0.0458669	0.00313314	0.00343237
				1179.05	0.0458643	0.00313569	0.0034348
				1180.05	0.0458618	0.00313824	0.00343723
				1181.05	0.0458592	0.0031408	0.00343967
				1182.05	0.0458566	0.00314335	0.0034421
				1183.05	0.0458541	0.0031459	0.00344453
				1184.05	0.0458515	0.00314845	0.00344696
				1185.05	0.045849	0.003151	0.00344939
				1186.05	0.0458464	0.00315355	0.00345182
				1187.05	0.0458439	0.0031561	0.00345425
				1188.05	0.0458413	0.00315866	0.00345668
				1189.05	0.0458388	0.00316121	0.00345911
				1190.05	0.0458362	0.00316376	0.00346153
				1191.05	0.0458337	0.00316631	0.00346396
				1192.05	0.0458311	0.00316886	0.00346639
				1193.05	0.0458286	0.00317141	0.00346881
				1194.05	0.0458261	0.00317395	0.00347124
				1195.05	0.0458235	0.0031765	0.00347366
				1196.05	0.0458209	0.00317905	0.00347608
				1197.05	0.0458184	0.0031816	0.00347851
				1198.05	0.0458158	0.00318415	0.00348093
				1199.05	0.0458133	0.0031867	0.00348335
				1200.05	0.0458107	0.00318925	0.00348577
				1201.05	0.0458082	0.00319179	0.00348819
				1202.05	0.0458057	0.00319434	0.00349061
				1203.05	0.0458031	0.00319689	0.00349303
				1204.05	0.0458006	0.00319943	0.00349545
				1205.05	0.045798	0.00320198	0.00349786
				1206.05	0.0457955	0.00320453	0.00350028
				1207.05	0.0457929	0.00320707	0.0035027
				1208.05	0.0457904	0.00320962	0.00350511
				1209.05	0.0457878	0.00321217	0.00350753
				1210.05	0.0457853	0.00321471	0.00350994
				1211.05	0.0457827	0.00321726	0.00351235
				1212.05	0.0457802	0.0032198	0.00351477
				1213.05	0.0457777	0.00322235	0.00351718
				1214.05	0.0457751	0.00322489	0.00351959
				1215.05	0.0457726	0.00322743	0.003522
				1216.05	0.04577	0.00322998	0.00352441
				1217.05	0.0457675	0.00323252	0.00352682
				1218.05	0.0457649	0.00323507	0.00352923
				1219.05	0.0457624	0.00323761	0.00353164
				1220.05	0.0457598	0.00324015	0.00353405
				1221.05	0.0457573	0.00324269	0.00353646
				1222.05	0.0457548	0.00324524	0.00353886
				1223.05	0.0457522	0.00324778	0.00354127
				1224.05	0.0457497	0.00325032	0.00354367
				1225.05	0.0457471	0.00325286	0.00354608
				1226.05	0.0457446	0.00325541	0.00354848
				1227.05	0.045742	0.00325795	0.00355088
				1228.05	0.0457395	0.00326049	0.00355329
				1229.05	0.045737	0.00326303	0.00355569
				1230.05	0.0457344	0.00326557	0.00355809
				1231.05	0.0457319	0.00326811	0.00356049
				1232.05	0.0457294	0.00327065	0.00356289
				1233.05	0.0457268	0.00327319	0.00356529
				1234.05	0.0457243	0.00327573	0.00356769
				1235.05	0.0457217	0.00327827	0.00357009
				1236.05	0.0457192	0.00328081	0.00357248
				1237.05	0.0457166	0.00328335	0.00357488
				1238.05	0.0457141	0.00328589	0.00357728
				1239.05	0.0457116	0.00328842	0.00357967
				1240.05	0.045709	0.00329096	0.00358207
				1241.05	0.0457065	0.0032935	0.00358446
				1242.05	0.045704	0.00329604	0.00358686
				1243.05	0.0457014	0.00329858	0.00358925
				1244.05	0.0456989	0.00330111	0.00359164
				1245.05	0.0456963	0.00330365	0.00359403
				1246.05	0.0456938	0.00330619	0.00359642
				1247.05	0.0456913	0.00330872	0.00359882
				1248.05	0.0456887	0.00331126	0.0036012
				1249.05	0.0456862	0.0033138	0.00360359
				1250.05	0.0456837	0.00331633	0.00360598
				1251.05	0.0456811	0.00331887	0.00360837
				1252.05	0.0456786	0.0033214	0.00361076
				1253.05	0.0456761	0.00332394	0.00361314
				1254.05	0.0456735	0.00332647	0.00361553
				1255.05	0.045671	0.00332901	0.00361792
				1256.05	0.0456685	0.00333154	0.0036203
				1257.05	0.0456659	0.00333408	0.00362268
				1258.05	0.0456634	0.00333661	0.00362507
				1259.05	0.0456609	0.00333914	0.00362745
				1260.05	0.0456583	0.00334168	0.00362983
				1261.05	0.0456558	0.00334421	0.00363221
				1262.05	0.0456533	0.00334674	0.0036346
				1263.05	0.0456507	0.00334928	0.00363698
				1264.05	0.0456482	0.00335181	0.00363935
				1265.05	0.0456457	0.00335434	0.00364173
				1266.05	0.0456431	0.00335687	0.00364411
				1267.05	0.0456406	0.00335941	0.00364649
				1268.05	0.0456381	0.00336194	0.00364887
				1269.05	0.0456355	0.00336447	0.00365124
				1270.05	0.045633	0.003367	0.00365362
				1271.05	0.0456305	0.00336953	0.00365599
				1272.05	0.0456279	0.00337206	0.00365837
				1273.05	0.0456254	0.00337459	0.00366074
				1274.05	0.0456229	0.00337712	0.00366312
				1275.05	0.0456203	0.00337965	0.00366549
				1276.05	0.0456178	0.00338218	0.00366786
				1277.05	0.0456153	0.00338471	0.00367023
				1278.05	0.0456128	0.00338724	0.0036726
				1279.05	0.0456102	0.00338977	0.00367497
				1280.05	0.0456077	0.0033923	0.00367734
				1281.05	0.0456052	0.00339483	0.00367971
				1282.05	0.0456026	0.00339736	0.00368208
				1283.05	0.0456001	0.00339988	0.00368445
				1284.05	0.0455976	0.00340241	0.00368681
				1285.05	0.0455951	0.00340494	0.00368918
				1286.05	0.0455925	0.00340747	0.00369155
				1287.05	0.04559	0.00340999	0.00369391
				1288.05	0.0455875	0.00341252	0.00369627
				1289.05	0.0455849	0.00341505	0.00369864
				1290.05	0.0455824	0.00341757	0.003701
				1291.05	0.0455799	0.0034201	0.00370336
				1292.05	0.0455774	0.00342262	0.00370573
				1293.05	0.0455749	0.00342515	0.00370809
				1294.05	0.0455723	0.00342768	0.00371045
				1295.05	0.0455698	0.0034302	0.00371281
				1296.05	0.0455673	0.00343273	0.00371517
				1297.05	0.0455648	0.00343525	0.00371753
				1298.05	0.0455622	0.00343778	0.00371988
				1299.05	0.0455597	0.0034403	0.00372224
				1300.05	0.0455572	0.00344282	0.0037246
				1301.05	0.0455547	0.00344535	0.00372695
				1302.05	0.0455521	0.00344787	0.00372931
				1303.05	0.0455496	0.00345039	0.00373166
				1304.05	0.0455471	0.00345292	0.00373402
				1305.05	0.0455446	0.00345544	0.00373637
				1306.05	0.045542	0.00345796	0.00373872
				1307.05	0.0455395	0.00346049	0.00374108
				1308.05	0.045537	0.00346301	0.00374343
				1309.05	0.0455345	0.00346553	0.00374578
				1310.05	0.045532	0.00346805	0.00374813
				1311.05	0.0455294	0.00347057	0.00375048
				1312.05	0.0455269	0.00347309	0.00375283
				1313.05	0.0455244	0.00347561	0.00375518
				1314.05	0.0455219	0.00347814	0.00375753
				1315.05	0.0455193	0.00348066	0.00375987
				1316.05	0.0455168	0.00348318	0.00376222
				1317.05	0.0455143	0.0034857	0.00376457
				1318.05	0.0455118	0.00348822	0.00376691
				1319.05	0.0455093	0.00349074	0.00376926
				1320.05	0.0455067	0.00349325	0.0037716
				1321.05	0.0455042	0.00349577	0.00377394
				1322.05	0.0455017	0.00349829	0.00377629
				1323.05	0.0454992	0.00350081	0.00377863
				1324.05	0.0454967	0.00350333	0.00378097
				1325.05	0.0454941	0.00350585	0.00378331
				1326.05	0.0454916	0.00350837	0.00378565
				1327.05	0.0454891	0.00351088	0.00378799
				1328.05	0.0454866	0.0035134	0.00379033
				1329.05	0.0454841	0.00351592	0.00379267
				1330.05	0.0454816	0.00351843	0.00379501
				1331.05	0.0454791	0.00352095	0.00379734
				1332.05	0.0454765	0.00352347	0.00379968
				1333.05	0.045474	0.00352598	0.00380202
				1334.05	0.0454715	0.0035285	0.00380435
				1335.05	0.045469	0.00353102	0.00380669
				1336.05	0.0454665	0.00353353	0.00380902
				1337.05	0.045464	0.00353605	0.00381135
				1338.05	0.0454614	0.00353856	0.00381369
				1339.05	0.0454589	0.00354108	0.00381602
				1340.05	0.0454564	0.00354359	0.00381835
				1341.05	0.0454539	0.00354611	0.00382068
				1342.05	0.0454514	0.00354862	0.00382301
				1343.05	0.0454489	0.00355113	0.00382534
				1344.05	0.0454464	0.00355365	0.00382767
				1345.05	0.0454438	0.00355616	0.00383
				1346.05	0.0454413	0.00355867	0.00383233
				1347.05	0.0454388	0.00356119	0.00383466
				1348.05	0.0454363	0.0035637	0.00383698
				1349.05	0.0454338	0.00356621	0.00383931
				1350.05	0.0454313	0.00356872	0.00384163
				1351.05	0.0454288	0.00357124	0.00384396
				1352.05	0.0454263	0.00357375	0.00384628
				1353.05	0.0454237	0.00357626	0.00384861
				1354.05	0.0454212	0.00357877	0.00385093
				1355.05	0.0454187	0.00358128	0.00385325
				1356.05	0.0454162	0.00358379	0.00385557
				1357.05	0.0454137	0.0035863	0.00385789
				1358.05	0.0454112	0.00358881	0.00386021
				1359.05	0.0454087	0.00359132	0.00386253
				1360.05	0.0454062	0.00359383	0.00386485
				1361.05	0.0454037	0.00359634	0.00386717
				1362.05	0.0454012	0.00359885	0.00386949
				1363.05	0.0453986	0.00360136	0.00387181
				1364.05	0.0453961	0.00360387	0.00387412
				1365.05	0.0453936	0.00360638	0.00387644
				1366.05	0.0453911	0.00360889	0.00387875
				1367.05	0.0453886	0.0036114	0.00388107
				1368.05	0.0453861	0.0036139	0.00388338
				1369.05	0.0453836	0.00361641	0.0038857
				1370.05	0.0453811	0.00361892	0.00388801
				1371.05	0.0453786	0.00362143	0.00389032
				1372.05	0.0453761	0.00362393	0.00389263
				1373.05	0.0453736	0.00362644	0.00389494
				1374.05	0.0453711	0.00362895	0.00389726
				1375.05	0.0453686	0.00363145	0.00389956
				1376.05	0.045366	0.00363396	0.00390187
				1377.05	0.0453635	0.00363647	0.00390418
				1378.05	0.045361	0.00363897	0.00390649
				1379.05	0.0453585	0.00364148	0.0039088
				1380.05	0.045356	0.00364398	0.0039111
				1381.05	0.0453535	0.00364649	0.00391341
				1382.05	0.045351	0.00364899	0.00391572
				1383.05	0.0453485	0.0036515	0.00391802
				1384.05	0.045346	0.003654	0.00392033
				1385.05	0.0453435	0.0036565	0.00392263
				1386.05	0.045341	0.00365901	0.00392493
				1387.05	0.0453385	0.00366151	0.00392723
				1388.05	0.045336	0.00366402	0.00392954
				1389.05	0.0453335	0.00366652	0.00393184
				1390.05	0.045331	0.00366902	0.00393414
				1391.05	0.0453285	0.00367152	0.00393644
				1392.05	0.045326	0.00367403	0.00393874
				1393.05	0.0453235	0.00367653	0.00394104
				1394.05	0.045321	0.00367903	0.00394333
				1395.05	0.0453185	0.00368153	0.00394563
				1396.05	0.045316	0.00368403	0.00394793
				1397.05	0.0453135	0.00368653	0.00395022
				1398.05	0.045311	0.00368904	0.00395252
				1399.05	0.0453085	0.00369154	0.00395481
				1400.05	0.045306	0.00369404	0.00395711
				1401.05	0.0453035	0.00369654	0.0039594
				1402.05	0.045301	0.00369904	0.0039617
				1403.05	0.0452985	0.00370154	0.00396399
				1404.05	0.045296	0.00370404	0.00396628
				1405.05	0.0452935	0.00370654	0.00396857
				1406.05	0.045291	0.00370904	0.00397086
				1407.05	0.0452885	0.00371153	0.00397315
				1408.05	0.045286	0.00371403	0.00397544
				1409.05	0.0452835	0.00371653	0.00397773
				1410.05	0.045281	0.00371903	0.00398002
				1411.05	0.0452785	0.00372153	0.00398231
				1412.05	0.045276	0.00372403	0.00398459
				1413.05	0.0452735	0.00372652	0.00398688
				1414.05	0.045271	0.00372902	0.00398916
				1415.05	0.0452685	0.00373152	0.00399145
				1416.05	0.045266	0.00373401	0.00399373
				1417.05	0.0452635	0.00373651	0.00399602
				1418.05	0.045261	0.00373901	0.0039983
				1419.05	0.0452585	0.0037415	0.00400058
				1420.05	0.045256	0.003744	0.00400287
				1421.05	0.0452535	0.00374649	0.00400515
				1422.05	0.045251	0.00374899	0.00400743
				1423.05	0.0452485	0.00375148	0.00400971
				1424.05	0.045246	0.00375398	0.00401199
				1425.05	0.0452435	0.00375647	0.00401427
				1426.05	0.045241	0.00375897	0.00401655
				1427.05	0.0452385	0.00376146	0.00401882
				1428.05	0.045236	0.00376396	0.0040211
				1429.05	0.0452335	0.00376645	0.00402338
				1430.05	0.0452311	0.00376894	0.00402565
				1431.05	0.0452286	0.00377144	0.00402793
				1432.05	0.0452261	0.00377393	0.0040302
				1433.05	0.0452236	0.00377642	0.00403248
				1434.05	0.0452211	0.00377892	0.00403475
				1435.05	0.0452186	0.00378141	0.00403702
				1436.05	0.0452161	0.0037839	0.0040393
				1437.05	0.0452136	0.00378639	0.00404157
				1438.05	0.0452111	0.00378888	0.00404384
				1439.05	0.0452086	0.00379138	0.00404611
				1440.05	0.0452061	0.00379387	0.00404838
				1441.05	0.0452036	0.00379636	0.00405065
				1442.05	0.0452012	0.00379885	0.00405292
				1443.05	0.0451987	0.00380134	0.00405518
				1444.05	0.0451962	0.00380383	0.00405745
				1445.05	0.0451937	0.00380632	0.00405972
				1446.05	0.0451912	0.00380881	0.00406198
				1447.05	0.0451887	0.0038113	0.00406425
				1448.05	0.0451862	0.00381379	0.00406651
				1449.05	0.0451837	0.00381628	0.00406878
				1450.05	0.0451812	0.00381877	0.00407104
				1451.05	0.0451787	0.00382126	0.00407331
				1452.05	0.0451763	0.00382374	0.00407557
				1453.05	0.0451738	0.00382623	0.00407783
				1454.05	0.0451713	0.00382872	0.00408009
				1455.05	0.0451688	0.00383121	0.00408235
				1456.05	0.0451663	0.0038337	0.00408461
				1457.05	0.0451638	0.00383618	0.00408687
				1458.05	0.0451613	0.00383867	0.00408913
				1459.05	0.0451588	0.00384116	0.00409139
				1460.05	0.0451564	0.00384364	0.00409365
				1461.05	0.0451539	0.00384613	0.0040959
				1462.05	0.0451514	0.00384862	0.00409816
				1463.05	0.0451489	0.0038511	0.00410041
				1464.05	0.0451464	0.00385359	0.00410267
				1465.05	0.0451439	0.00385607	0.00410492
				1466.05	0.0451414	0.00385856	0.00410718
				1467.05	0.045139	0.00386104	0.00410943
				1468.05	0.0451365	0.00386353	0.00411168
				1469.05	0.045134	0.00386601	0.00411394
				1470.05	0.0451315	0.0038685	0.00411619
				1471.05	0.045129	0.00387098	0.00411844
				1472.05	0.0451265	0.00387346	0.00412069
				1473.05	0.045124	0.00387595	0.00412294
				1474.05	0.0451216	0.00387843	0.00412519
				1475.05	0.0451191	0.00388091	0.00412744
				1476.05	0.0451166	0.0038834	0.00412968
				1477.05	0.0451141	0.00388588	0.00413193
				1478.05	0.0451116	0.00388836	0.00413418
				1479.05	0.0451092	0.00389084	0.00413642
				1480.05	0.0451067	0.00389333	0.00413867
				1481.05	0.0451042	0.00389581	0.00414091
				1482.05	0.0451017	0.00389829	0.00414316
				1483.05	0.0450992	0.00390077	0.0041454
				1484.05	0.0450967	0.00390325	0.00414765
				1485.05	0.0450943	0.00390573	0.00414989
				1486.05	0.0450918	0.00390821	0.00415213
				1487.05	0.0450893	0.00391069	0.00415437
				1488.05	0.0450868	0.00391317	0.00415661
				1489.05	0.0450844	0.00391565	0.00415885
				1490.05	0.0450819	0.00391813	0.00416109
				1491.05	0.0450794	0.00392061	0.00416333
				1492.05	0.0450769	0.00392309	0.00416557
				1493.05	0.0450744	0.00392557	0.00416781
				1494.05	0.0450719	0.00392805	0.00417004
				1495.05	0.0450695	0.00393053	0.00417228
				1496.05	0.045067	0.00393301	0.00417451
				1497.05	0.0450645	0.00393549	0.00417675
				1498.05	0.045062	0.00393796	0.00417898
				1499.05	0.0450596	0.00394044	0.00418122
				1500.05	0.0450571	0.00394292	0.00418345
				1501.05	0.0450546	0.0039454	0.00418568
				1502.05	0.0450521	0.00394787	0.00418792
				1503.05	0.0450496	0.00395035	0.00419015
				1504.05	0.0450472	0.00395283	0.00419238
				1505.05	0.0450447	0.0039553	0.00419461
				1506.05	0.0450422	0.00395778	0.00419684
				1507.05	0.0450398	0.00396025	0.00419907
				1508.05	0.0450373	0.00396273	0.0042013
				1509.05	0.0450348	0.0039652	0.00420352
				1510.05	0.0450323	0.00396768	0.00420575
				1511.05	0.0450299	0.00397015	0.00420798
				1512.05	0.0450274	0.00397263	0.0042102
				1513.05	0.0450249	0.0039751	0.00421243
				1514.05	0.0450224	0.00397758	0.00421466
				1515.05	0.04502	0.00398005	0.00421688
				1516.05	0.0450175	0.00398252	0.0042191
				1517.05	0.045015	0.003985	0.00422133
				1518.05	0.0450125	0.00398747	0.00422355
				1519.05	0.0450101	0.00398994	0.00422577
				1520.05	0.0450076	0.00399242	0.00422799
				1521.05	0.0450051	0.00399489	0.00423021
				1522.05	0.0450026	0.00399736	0.00423243
				1523.05	0.0450002	0.00399983	0.00423465
				1524.05	0.0449977	0.00400231	0.00423687
				1525.05	0.0449952	0.00400478	0.00423909
				1526.05	0.0449927	0.00400725	0.00424131
				1527.05	0.0449903	0.00400972	0.00424352
				1528.05	0.0449878	0.00401219	0.00424574
				1529.05	0.0449853	0.00401466	0.00424796
				1530.05	0.0449829	0.00401713	0.00425017
				1531.05	0.0449804	0.0040196	0.00425239
				1532.05	0.0449779	0.00402207	0.0042546
[truncated: 63,468 more rows]

## Sheet: BuDABCOI_BuI_DMSO_70C
Measured and fit concentrations (molar) vs. time (seconds) for the reaction BuDABCOI + BuI ® Bu2-DABCO-I2 in DMSO-d6 at 70 C. The side reaction BuI + DMSO ® DMSO·BuI is also considered.
[truncated: 100,022 more rows]

[truncated: 14 more sheets: DABCO_BuI_MeOD_55C, DABCO_MeI_MeOD_30C, DABCO_MeI_MeOD_45C, DABCO_MeI_MeOD_55C, MeDABCOI_MeI_AcN_30C, MeDABCOI_MeI_AcN_50C, MeDABCOI_MeI_AcN_77C, MeDABCOI_MeI_DMSO_30C, MeDABCOI_MeI_DMSO_50C, MeDABCOI_MeI_DMSO_70C, MeDABCOI_MeI_MeOD_30C, MeDABCOI_MeI_MeOD_45C, MeDABCOI_MeI_MeOD_55C, DABCO_MeI_CH3OH_55C]
