# Supplementary figures and images for: An experimental, computational, and uncertainty analysis study of the rates of iodoalkane trapping by DABCO in solution phase organic media
Source: Royal Society of Chemistry journal article supplement (doi:10.1039/d2cp05286e), 2023-01-01

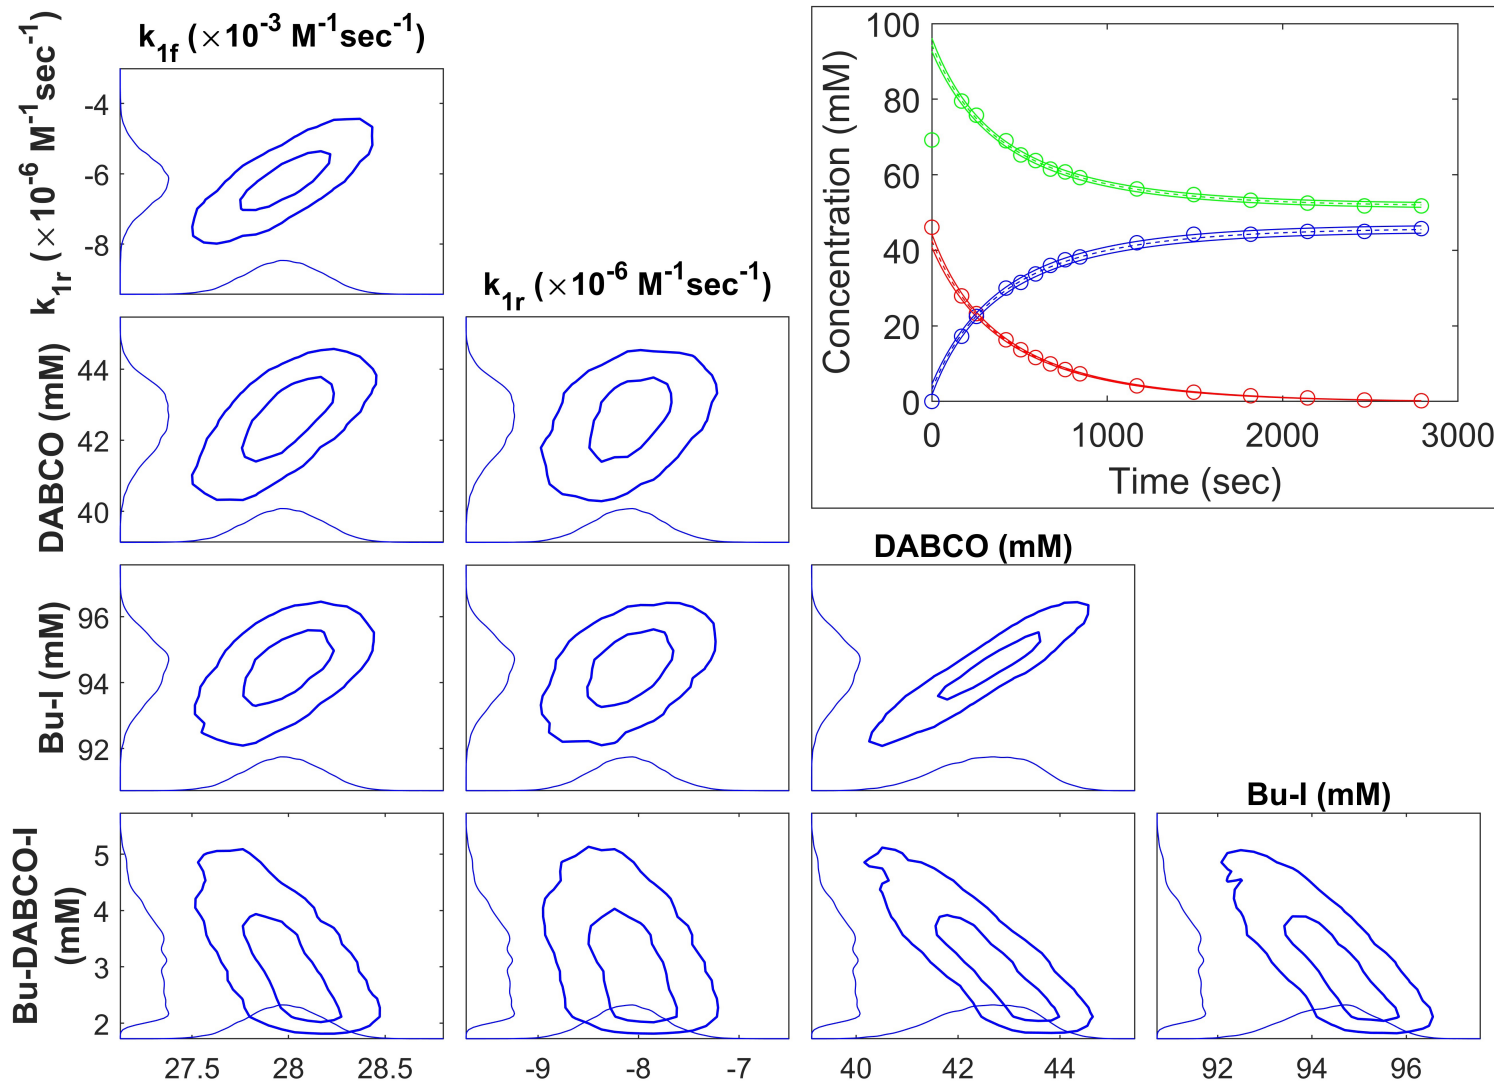

Supplement: d2cp05286e1.pdf [file d2cp05286e1.pdf]
